# Supplementary material for: Deep metagenomic characterization of gut microbial community and function in preeclampsia
Source: Front Cell Infect Microbiol. 2022 Sep 14;12:933523. doi: 10.3389/fcimb.2022.933523 (PMC9515455; doi:10.3389/fcimb.2022.933523)
Supplement: Supplementary file 1 [file Table_1.xlsx]

## Sheet: ST1
Table S1| Sequencing summary and assembly information of 77 fecal samples used in this study.
Sample ID	Type	Age	Gestational week	Number of sequencing reads	Data size (Gb)	Number of assembled contigs (>2kb)	Total length of the contigs (bp)	Maximum length of the contigs (bp)	N50 length of the contigs (bp)	G+C content (%)
CN01	Healthy	34	39+6	40229824	6.03	10832	90980658	692054	16620	48.62
CN02	Healthy	21	40+1	64456336	9.67	17186	161576818	379863	20841	48.38
CN03	Healthy	34	39+2	56799018	8.52	16523	161240850	483729	23867	47.17
CN04	Healthy	37	39+5	69384184	10.41	14742	137537156	410973	21030	45.17
CN05	Healthy	32	36+3	74630400	11.19	20331	169261310	289035	17355	51.38
CN06	Healthy	34	40+4	92728176	13.91	27508	203852443	747084	12833	50.13
CN07	Healthy	35	39+2	52095306	7.81	20183	134391652	259904	9764	48.57
CN08	Healthy	38	38+2	43083728	6.46	17324	139091064	417183	14706	50.3
CN09	Healthy	32	35+1	37721218	5.66	10037	88465358	980009	19262	52.83
CN18	Healthy	26	40+3	43638294	6.55	14560	76977248	160244	6453	49.54
CN19	Healthy	29	32+4	58345808	8.75	19703	137500026	312671	10863	49.6
CN20	Healthy	30	38+5	90623414	13.59	13471	142846199	544432	27328	47.58
CN21	Healthy	29	40+0	55092558	8.26	22783	196839491	864078	17150	47.57
CN22	Healthy	26	37+5	75826214	11.37	22271	150671587	343508	10751	49.15
CN23	Healthy	32	38+6	66599756	9.99	5778	58270503	521715	28936	48.77
CN24	Healthy	24	38+0	92256540	13.84	14660	115484430	996703	14072	52.08
CN25	Healthy	24	39+1	93144820	13.97	20089	183917629	677178	22655	45.5
CN26	Healthy	26	39+2	77198036	11.58	15144	176937493	730512	37876	47
CN27	Healthy	31	38+0	56829410	8.52	25621	226816304	403426	17201	46.15
CN28	Healthy	31	40+1	91134646	13.67	20743	174019064	666559	16301	51.58
CN29	Healthy	26	40+3	74444722	11.17	25240	225805357	632890	21784	52.15
CN30	Healthy	28	39+0	40266024	6.04	7233	66580645	437319	19789	44.84
CN31	Healthy	23	40+1	84585594	12.69	19505	197065156	563457	24033	47.84
CN32	Healthy	33	39+1	41877886	6.28	11721	88247612	464137	12913	53.24
CN33	Healthy	37	39+3	70571158	10.59	10583	99405763	641787	23567	48.81
CN34	Healthy	25	40+2	78754780	11.81	24346	238972223	785743	25485	47.64
CN35	Healthy	30	39+1	43802100	6.57	14555	151116636	732414	24405	45.1
CN36	Healthy	29	40+2	78083252	11.71	21035	189066801	734509	21007	46.84
CN37	Healthy	32	40+1	74210018	11.13	10598	133891125	978130	44995	45.44
PE01	Preeclampsia	28	35+4	78594066	11.79	16133	134367892	339399	16470	48.28
PE02	Preeclampsia	28	39+2	73886240	11.08	13416	139106501	469809	25896	49.48
PE03	Preeclampsia	29	38+6	39202928	5.88	13253	113589095	834470	19076	46.93
PE04	Preeclampsia	28	39+3	49491432	7.42	28436	219434078	662907	14483	47.17
PE05	Preeclampsia	40	34+5	48687970	7.3	17384	178465628	552142	25474	44.59
PE06	Preeclampsia	25	33+5	65299150	9.79	19698	138204627	357893	10826	53.17
PE07	Preeclampsia	38	35+0	47265868	7.09	21479	153284228	519251	12131	52.74
PE08	Preeclampsia	32	37+4	56290238	8.44	18603	184156585	716159	29017	47.79
PE09	Preeclampsia	25	30+4	81851500	12.28	24664	211632247	574645	19007	50.33
PE10	Preeclampsia	33	32+5	92517720	13.88	13425	106553134	417302	15186	49.64
PE11	Preeclampsia	31	34+6	68324600	10.25	5834	61646317	540701	33623	48.35
PE12	Preeclampsia	39	31+5	69384474	10.41	16032	134443089	731957	15270	48.21
PE13	Preeclampsia	35	37+1	62069042	9.31	9290	87343663	560520	22573	47.21
PE14	Preeclampsia	30	39+0	118528336	17.78	13639	122804957	710112	17541	48.97
PE15	Preeclampsia	31	36+5	60710918	9.11	7066	76621172	575803	29103	45.04
PE16	Preeclampsia	33	35+3	60365544	9.05	7539	57587713	604267	13433	49.73
PE17	Preeclampsia	28	30+4	60576810	9.09	24343	160358267	324442	10490	52.06
PE18	Preeclampsia	28	39+6	47000220	7.05	6300	74982026	679676	29252	44.42
PE19	Preeclampsia	24	38+2	46200672	6.93	18715	132343454	479192	11909	48.75
PE20	Preeclampsia	22	32+1	74339376	11.15	8601	69267619	616441	16754	47.68
PE21	Preeclampsia	23	39+1	88759698	13.31	12056	101710173	643431	16982	50.49
PE22	Preeclampsia	34	29+5	86478282	12.97	10918	90105209	356640	16902	48.53
PE23	Preeclampsia	38	33+2	65959524	9.89	20645	157849792	706759	14094	51.83
PE24	Preeclampsia	34	32+2	98922834	14.84	14283	101059018	308988	13260	48.93
PE25	Preeclampsia	31	37+1	58804004	8.82	7173	61321756	447928	16923	49.59
PE26	Preeclampsia	29	39+6	49032744	7.35	19340	166407560	602385	16496	48.43
PE27	Preeclampsia	40	29+6	64574020	9.69	12699	127204465	566795	27791	46.59
PE28	Preeclampsia	34	38+5	71813392	10.77	21096	209035764	487489	23434	48.84
PE29	Preeclampsia	38	39+1	73711602	11.06	28866	248041658	716015	16069	49.35
PE30	Preeclampsia	32	30+5	96415740	14.46	21495	149171291	478718	10557	52.05
PE31	Preeclampsia	23	37+0	72494172	10.87	12189	136937252	640795	29098	44.96
PE32	Preeclampsia	37	37+2	49728984	7.46	11019	100793920	367693	22709	44.84
PE33	Preeclampsia	32	30+3	48054994	7.21	18947	148200458	455265	14964	49.44
PE34	Preeclampsia	31	28+3	51538362	7.73	9345	85816237	1059877	22732	46.22
PE35	Preeclampsia	32	35+5	75239136	11.29	26072	224274943	1061187	15319	47.86
PE36	Preeclampsia	37	39+2	74827232	11.22	19987	184978684	454202	18940	49.32
PE37	Preeclampsia	27	36+3	88941578	13.34	5363	68279220	562782	33476	46.04
PE38	Preeclampsia	36	30+6	95812050	14.37	17773	152090646	740972	17184	50.44
PE39	Preeclampsia	26	36+0	60845038	9.13	11438	63750575	202666	7179	45.43
PE40	Preeclampsia	35	29+6	73412056	11.01	9200	95201361	582716	25522	46.53
