# Supplementary material for: Deep metagenomic characterization of gut microbial community and function in preeclampsia
Source: Front Cell Infect Microbiol. 2022 Sep 14;12:933523. doi: 10.3389/fcimb.2022.933523 (PMC9515455; doi:10.3389/fcimb.2022.933523)
Supplement: Supplementary file 2 [file Table_2.xlsx]

## Sheet: ST2
Table S2| Detailed information of 1,750 metagenome-assembled genomes.
MAGs_ID	Cluster ID	Number of contigs	Genome size	Length of N50	Length of N90	Maximum length	G+C content (%)	Sequencing depth in sample	% Completeness	% Contamination	Quality score	Domain	Phylum	Class	Order	Famiy	Genus	Species
CN34.bin.2	clu_1	71	2765137	68536	19869	222876	46.33	13.42	94.93	0	94.93	Bacteria	Firmicutes	Bacilli	Lactobacillales	Lactobacillaceae	Lacticaseibacillus	Lacticaseibacillus paracasei
CN06.bin.20	clu_1	41	2776877	158015	29944	331447	46.47	26.34	99.46	0.54	96.76	Bacteria	Firmicutes	Bacilli	Lactobacillales	Lactobacillaceae	Lacticaseibacillus	Lacticaseibacillus paracasei
PE08.bin.34	clu_1	92	2890487	58319	17232	222877	46.32	15.63	99.4	0	99.4	Bacteria	Firmicutes	Bacilli	Lactobacillales	Lactobacillaceae	Lacticaseibacillus	Lacticaseibacillus paracasei
CN31.bin.22	clu_1	40	2881068	153855	33843	434779	46.32	54.84	99.46	0	99.46	Bacteria	Firmicutes	Bacilli	Lactobacillales	Lactobacillaceae	Lacticaseibacillus	Lacticaseibacillus paracasei
CN04.bin.62	clu_1	104	2728405	42261	11165	222876	46.53	11.16	97.09	0.33	95.44	Bacteria	Firmicutes	Bacilli	Lactobacillales	Lactobacillaceae	Lacticaseibacillus	Lacticaseibacillus paracasei
PE35.bin.4	clu_1	314	2367040	9812	3660	42246	46.7	10.4	82.81	0.14	82.11	Bacteria	Firmicutes	Bacilli	Lactobacillales	Lactobacillaceae	Lacticaseibacillus	Lacticaseibacillus paracasei
PE34.bin.19	clu_1	28	2495145	237021	34725	327258	46.42	156.93	87.77	0	87.77	Bacteria	Firmicutes	Bacilli	Lactobacillales	Lactobacillaceae	Lacticaseibacillus	Lacticaseibacillus paracasei
PE15.bin.8	clu_1	361	2225984	7371	3244	30034	46.96	8.28	85.94	0.12	85.34	Bacteria	Firmicutes	Bacilli	Lactobacillales	Lactobacillaceae	Lacticaseibacillus	Lacticaseibacillus paracasei
CN24.bin.30	clu_2	222	2711079	16999	5741	55716	46.83	9.56	95.07	0.2	94.07	Bacteria	Firmicutes	Bacilli	Lactobacillales	Lactobacillaceae	Lacticaseibacillus	Lacticaseibacillus rhamnosus
PE24.bin.1	clu_3	158	1714325	16712	5217	43181	40.38	21.97	95.24	1.54	87.54	Bacteria	Firmicutes	Bacilli	Lactobacillales	Lactobacillaceae	Limosilactobacillus	Limosilactobacillus vaginalis
PE24.bin.10	clu_4	87	3365087	60563	17653	240592	46.75	41.55	98.77	2.01	88.72	Bacteria	Firmicutes	Bacilli	Lactobacillales	Lactobacillaceae	Lactiplantibacillus	Lactiplantibacillus pentosus
PE10.bin.29	clu_5	48	1839981	53741	20463	162616	52.81	115.05	98.09	0	98.09	Bacteria	Firmicutes	Bacilli	Lactobacillales	Lactobacillaceae	Limosilactobacillus	Limosilactobacillus fermentum
PE24.bin.2	clu_5	133	1725833	16630	6293	65409	53.15	120.69	95.36	0.82	91.26	Bacteria	Firmicutes	Bacilli	Lactobacillales	Lactobacillaceae	Limosilactobacillus	Limosilactobacillus fermentum
CN13.bin.25	clu_5	77	1620000	29533	9786	78555	53.27	15.66	88.41	0.55	85.66	Bacteria	Firmicutes	Bacilli	Lactobacillales	Lactobacillaceae	Limosilactobacillus	Limosilactobacillus fermentum
CN02.bin.1	clu_5	238	1416055	7016	2967	37042	53.89	9.13	83.56	1	78.56	Bacteria	Firmicutes	Bacilli	Lactobacillales	Lactobacillaceae	Limosilactobacillus	Limosilactobacillus fermentum
PE27.bin.47	clu_5	208	1385681	8118	3376	37010	53.97	10.88	85.43	0.27	84.08	Bacteria	Firmicutes	Bacilli	Lactobacillales	Lactobacillaceae	Limosilactobacillus	Limosilactobacillus fermentum
PE13.bin.49	clu_6	35	1822428	86180	25827	200866	47.1	20.43	99.18	0	99.18	Bacteria	Firmicutes	Bacilli	Lactobacillales	Lactobacillaceae	Limosilactobacillus	Limosilactobacillus mucosae
PE24.bin.29	clu_7	197	1166362	6914	3067	19047	55.36	8.6	77.08	0.11	76.53	Bacteria	Firmicutes	Bacilli	Lactobacillales	Lactobacillaceae	Limosilactobacillus	Limosilactobacillus pontis
PE31.bin.13	clu_8	23	1955501	197215	61604	427062	38.72	25.39	99.62	0.38	97.72	Bacteria	Firmicutes	Bacilli	Lactobacillales	Streptococcaceae	Lactococcus	Lactococcus lactis
PE37.bin.32	clu_9	256	1911110	9680	3337	35999	35.79	15.77	93.26	1.7	84.76	Bacteria	Firmicutes	Bacilli	Lactobacillales	Streptococcaceae	Lactococcus	Lactococcus lactis
CN25.bin.36	clu_10	67	1945784	49033	12646	149623	38.15	21.79	93.51	1.72	84.91	Bacteria	Firmicutes	Bacilli	Lactobacillales	Streptococcaceae	Lactococcus	Lactococcus garvieae
CN37.bin.56	clu_11	59	1846670	49830	17299	195003	37.37	51.99	94.1	0.19	93.15	Bacteria	Firmicutes	Bacilli	Lactobacillales	Streptococcaceae	Streptococcus	Streptococcus pasteurianus
PE18.bin.29	clu_11	24	2019776	93581	46352	679676	37.1	196.66	99.86	0.75	96.11	Bacteria	Firmicutes	Bacilli	Lactobacillales	Streptococcaceae	Streptococcus	Streptococcus pasteurianus
PE24.bin.36	clu_11	31	1934247	112899	40998	231204	37.29	95.76	99.71	1.12	94.11	Bacteria	Firmicutes	Bacilli	Lactobacillales	Streptococcaceae	Streptococcus	Streptococcus pasteurianus
CN29.bin.5	clu_11	35	1762623	105567	24620	187715	37.6	16.45	99.87	0.89	95.42	Bacteria	Firmicutes	Bacilli	Lactobacillales	Streptococcaceae	Streptococcus	Streptococcus macedonicus
CN24.bin.20	clu_11	206	1812024	11442	4034	45397	37.28	8.8	91.35	2.12	80.75	Bacteria	Firmicutes	Bacilli	Lactobacillales	Streptococcaceae	Streptococcus	Streptococcus pasteurianus
CN26.bin.84	clu_11	30	2042645	152999	31365	379636	37.22	25.87	99.11	0.19	98.16	Bacteria	Firmicutes	Bacilli	Lactobacillales	Streptococcaceae	Streptococcus	Streptococcus pasteurianus
PE03.bin.10	clu_11	15	1718685	165563	55828	582699	37.19	25.51	90.26	0	90.26	Bacteria	Firmicutes	Bacilli	Lactobacillales	Streptococcaceae	Streptococcus	Streptococcus pasteurianus
PE09.bin.107	clu_12	26	1746171	120933	35069	287864	37.58	155.24	94.01	0.09	93.56	Bacteria	Firmicutes	Bacilli	Lactobacillales	Streptococcaceae	Streptococcus	Streptococcus infantarius
PE10.bin.21	clu_12	74	1786663	38116	12298	99665	37.58	216.41	96.66	2.62	83.56	Bacteria	Firmicutes	Bacilli	Lactobacillales	Streptococcaceae	Streptococcus	Streptococcus lutetiensis
PE27.bin.57	clu_13	194	1375518	9269	3450	38733	41.15	9.86	89.38	3.58	71.48	Bacteria	Firmicutes	Bacilli	Lactobacillales	Streptococcaceae	Streptococcus	Unknown
CN02.bin.34	clu_14	230	1382563	7623	2914	45867	42.84	18	72.55	2.78	58.65	Bacteria	Firmicutes	Bacilli	Lactobacillales	Streptococcaceae	Streptococcus	Streptococcus parasanguinis
PE31.bin.21	clu_14	189	1653103	14441	3786	46804	42.49	13.2	82.72	3.76	63.92	Bacteria	Firmicutes	Bacilli	Lactobacillales	Streptococcaceae	Streptococcus	Streptococcus parasanguinis
PE34.bin.11	clu_14	265	1675061	7884	3187	23714	42.62	16.77	83.23	3.25	66.98	Bacteria	Firmicutes	Bacilli	Lactobacillales	Streptococcaceae	Streptococcus	Streptococcus parasanguinis
PE37.bin.30	clu_15	65	1750899	52147	14056	118741	39.13	89.45	99.45	0.15	98.7	Bacteria	Firmicutes	Bacilli	Lactobacillales	Streptococcaceae	Streptococcus	Streptococcus thermophilus
CN08.bin.19	clu_15	46	1755511	66039	19177	132481	38.99	77.95	99.53	0.58	96.63	Bacteria	Firmicutes	Bacilli	Lactobacillales	Streptococcaceae	Streptococcus	Streptococcus thermophilus
CN03.bin.55	clu_15	79	1694565	32460	10144	102053	39.03	25.79	98.29	0.69	94.84	Bacteria	Firmicutes	Bacilli	Lactobacillales	Streptococcaceae	Streptococcus	Streptococcus thermophilus
CN07.bin.56	clu_15	102	1530351	21041	7556	89889	39.28	34.73	85.74	2.85	71.49	Bacteria	Firmicutes	Bacilli	Lactobacillales	Streptococcaceae	Streptococcus	Streptococcus thermophilus
CN32.bin.27	clu_16	312	1504681	5425	2539	19611	39.97	9.84	76.56	3.05	61.31	Bacteria	Firmicutes	Bacilli	Lactobacillales	Streptococcaceae	Streptococcus	Streptococcus salivarius
PE02.bin.35	clu_16	148	1895451	19028	5945	59436	40.02	12.98	95.42	2.56	82.62	Bacteria	Firmicutes	Bacilli	Lactobacillales	Streptococcaceae	Streptococcus	Streptococcus salivarius
PE39.bin.12	clu_16	224	2027191	12646	4685	33131	39.67	188.82	93.81	4.88	69.41	Bacteria	Firmicutes	Bacilli	Lactobacillales	Streptococcaceae	Streptococcus	Streptococcus salivarius
PE12.bin.4	clu_16	119	1941007	25362	7635	72542	39.85	26.01	90.68	2.44	78.48	Bacteria	Firmicutes	Bacilli	Lactobacillales	Streptococcaceae	Streptococcus	Streptococcus salivarius
PE19.bin.62	clu_16	56	2091979	66085	17245	197972	39.93	57.73	98.57	1.95	88.82	Bacteria	Firmicutes	Bacilli	Lactobacillales	Streptococcaceae	Streptococcus	Streptococcus salivarius
CN17.bin.47	clu_16	256	1680809	8494	3157	34060	40.23	50.29	78	3.5	60.5	Bacteria	Firmicutes	Bacilli	Lactobacillales	Streptococcaceae	Streptococcus	Streptococcus salivarius
PE30.bin.7	clu_16	59	1601401	39106	13340	133951	39.88	34.68	77.72	1.53	70.07	Bacteria	Firmicutes	Bacilli	Lactobacillales	Streptococcaceae	Streptococcus	Streptococcus salivarius
PE07.bin.7	clu_16	227	1674901	9939	3487	53338	40.2	12.64	84.95	0.64	81.75	Bacteria	Firmicutes	Bacilli	Lactobacillales	Streptococcaceae	Streptococcus	Streptococcus salivarius
PE09.bin.20	clu_17	161	1734672	15644	4725	84737	45.18	14.51	91.67	0.92	87.07	Bacteria	Firmicutes	Bacilli	Lactobacillales	Lactobacillaceae	Weissella	Weissella confusa
PE10.bin.4	clu_17	156	1869342	22837	5003	64690	45.08	22.11	95.09	0.37	93.24	Bacteria	Firmicutes	Bacilli	Lactobacillales	Lactobacillaceae	Weissella	Weissella confusa
PE31.bin.62	clu_17	45	1995978	70611	24887	228781	44.83	13.29	97.85	0	97.85	Bacteria	Firmicutes	Bacilli	Lactobacillales	Lactobacillaceae	Weissella	Weissella confusa
PE02.bin.31	clu_17	67	2018549	40953	17372	132782	44.76	250.16	90.63	0.98	85.73	Bacteria	Firmicutes	Bacilli	Lactobacillales	Lactobacillaceae	Weissella	Weissella confusa
PE32.bin.45	clu_18	33	2247699	126916	39740	363638	45.14	13.66	92.64	0.61	89.59	Bacteria	Firmicutes	Bacilli	Lactobacillales	Lactobacillaceae	Weissella	Weissella cibaria
PE02.bin.50	clu_18	128	2060100	24821	7287	85556	45.01	69.44	88.97	0.61	85.92	Bacteria	Firmicutes	Bacilli	Lactobacillales	Lactobacillaceae	Weissella	Weissella cibaria
PE02.bin.55	clu_19	18	1915473	169207	61834	335144	42.28	70.96	99.38	0	99.38	Bacteria	Firmicutes	Bacilli	Lactobacillales	Lactobacillaceae	Pediococcus	Pediococcus acidilactici
PE06.bin.12	clu_20	86	1432051	23689	8371	80034	44.19	18.7	97.05	0	97.05	Bacteria	Firmicutes	Bacilli	Lactobacillales	Lactobacillaceae	Leuconostoc	Leuconostoc lactis
CN13.bin.1	clu_21	195	1567833	10520	3941	36015	37.04	12.42	81.37	0.38	79.47	Bacteria	Firmicutes	Bacilli	Lactobacillales	Lactobacillaceae	Pediococcus	Pediococcus pentosaceus
CN13.bin.2	clu_22	78	1939572	49329	12522	107456	37.97	185.46	93.71	2.35	81.96	Bacteria	Firmicutes	Bacilli	Lactobacillales	Lactobacillaceae	Weissella	Weissella paramesenteroides
CN30.bin.28	clu_23	54	2965684	86313	26762	347372	37.18	259.7	96.03	2.54	83.33	Bacteria	Firmicutes	Bacilli	Bacillales	Planococcaceae	Sporosarcina	Unknown
PE31.bin.5	clu_24	459	3029599	8235	3110	38336	30.73	9.34	96.07	3.37	79.22	Bacteria	Firmicutes	Fusobacteriia	Fusobacteriales	Fusobacteriaceae	Fusobacterium	Fusobacterium ulcerans
PE15.bin.19	clu_25	79	2327663	41062	15948	145908	45.28	18.51	98.88	2.06	88.58	Bacteria	Firmicutes	Bacilli	Lactobacillales	Enterococcaceae	Enterococcus	Enterococcus asini
PE31.bin.45	clu_25	294	2049732	8574	3619	31619	45.37	7.92	87.11	2.71	73.56	Bacteria	Firmicutes	Bacilli	Lactobacillales	Enterococcaceae	Enterococcus	Enterococcus asini
CN17.bin.25	clu_26	396	2230516	6538	2829	40066	45.75	9.68	82.58	4.09	62.13	Bacteria	Firmicutes	Clostridia	Oscillospirales	Ruminococcaceae	Negativibacillus	Negativibacillus massiliensis
PE40.bin.8	clu_27	37	2822090	138117	41786	513239	37.36	22.42	98.88	0	98.88	Bacteria	Firmicutes	Bacilli	Lactobacillales	Enterococcaceae	Enterococcus	Enterococcus faecalis
PE15.bin.23	clu_27	61	2407877	62466	21139	133867	37.92	16.27	96.07	0.5	93.57	Bacteria	Firmicutes	Bacilli	Lactobacillales	Enterococcaceae	Enterococcus	Enterococcus faecalis
PE40.bin.12	clu_28	71	2589862	70156	20205	193128	38.35	14.9	99.25	2.68	85.85	Bacteria	Firmicutes	Bacilli	Lactobacillales	Enterococcaceae	Enterococcus	Enterococcus faecium
CN17.bin.85	clu_28	446	1938555	4633	2470	17646	38.99	8.26	73.76	2.01	63.71	Bacteria	Firmicutes	Bacilli	Lactobacillales	Enterococcaceae	Enterococcus	Enterococcus faecium
CN28.bin.1	clu_29	359	1673660	5104	2574	24132	38.77	8.31	81.06	3.2	65.06	Bacteria	Firmicutes	Bacilli	Lactobacillales	Enterococcaceae	Enterococcus	Unknown
CN30.bin.12	clu_30	162	2975511	27495	9227	116754	36.54	457.93	97	1.51	89.45	Bacteria	Firmicutes	Bacilli	Lactobacillales	Enterococcaceae	Enterococcus	Enterococcus hirae
CN24.bin.11	clu_31	35	3114814	183589	66782	318528	40.7	18.27	99.25	3.4	82.25	Bacteria	Firmicutes	Bacilli	Lactobacillales	Enterococcaceae	Enterococcus	Enterococcus gallinarum
PE15.bin.21	clu_31	46	2781013	106394	35113	303599	41.03	20.58	92.45	0	92.45	Bacteria	Firmicutes	Bacilli	Lactobacillales	Enterococcaceae	Enterococcus	Enterococcus gallinarum
PE15.bin.7	clu_32	105	1861510	42813	6444	145857	34.33	19.56	97.09	1.77	88.24	Bacteria	Firmicutes	Bacilli	Lactobacillales	Lactobacillaceae	Lactobacillus	Lactobacillus johnsonii
PE34.bin.55	clu_33	87	1821817	32715	9431	138665	34.69	12.38	98.12	1.29	91.67	Bacteria	Firmicutes	Bacilli	Lactobacillales	Lactobacillaceae	Lactobacillus	Lactobacillus paragasseri
CN02.bin.72	clu_34	240	1743921	9163	3503	74576	38.76	13.51	91.92	3.47	74.57	Bacteria	Firmicutes	Negativicutes	Veillonellales	Veillonellaceae	Veillonella	Veillonella parvula
CN27.bin.3	clu_35	144	2518998	26378	7542	71704	47.12	70.51	72.81	2.63	59.66	Bacteria	Firmicutes	Clostridia	Lachnospirales	Lachnospiraceae	Acetatifactor	Unknown
CN34.bin.37	clu_35	106	2870833	37235	14047	131781	46.7	13.82	95.13	1.98	85.23	Bacteria	Firmicutes	Clostridia	Lachnospirales	Lachnospiraceae	Acetatifactor	Unknown
CN19.bin.12	clu_35	213	2247072	13515	5266	46522	47.51	17.23	84.39	3.27	68.04	Bacteria	Firmicutes	Clostridia	Lachnospirales	Lachnospiraceae	Acetatifactor	Unknown
PE09.bin.43	clu_35	321	2463671	10423	3581	42640	47.87	11.07	81.09	4.93	56.44	Bacteria	Firmicutes	Clostridia	Lachnospirales	Lachnospiraceae	Acetatifactor	Unknown
PE28.bin.52	clu_36	286	2151456	9419	3756	42255	48.23	9.83	72.36	1.67	64.01	Bacteria	Firmicutes	Clostridia	Lachnospirales	Lachnospiraceae	Acetatifactor	Unknown
CN35.bin.51	clu_36	74	3421721	71297	22489	167862	46.57	28.37	95.17	4.11	74.62	Bacteria	Firmicutes	Clostridia	Lachnospirales	Lachnospiraceae	Acetatifactor	Unknown
PE05.bin.28	clu_36	296	2829140	12586	4486	66650	47.47	11.46	86.82	4.32	65.22	Bacteria	Firmicutes	Clostridia	Lachnospirales	Lachnospiraceae	Acetatifactor	Unknown
CN17.bin.79	clu_37	26	2657716	201079	54531	303489	41.19	26.01	99.33	0	99.33	Bacteria	Firmicutes	Clostridia	Lachnospirales	Lachnospiraceae	Coprococcus	Unknown
CN21.bin.62	clu_37	38	2615498	131539	51155	235512	41.35	57.66	99.33	0	99.33	Bacteria	Firmicutes	Clostridia	Lachnospirales	Lachnospiraceae	Coprococcus	Unknown
CN18.bin.11	clu_37	518	2179875	4516	2487	15333	41.78	30.45	73.42	4.87	49.07	Bacteria	Firmicutes	Clostridia	Lachnospirales	Lachnospiraceae	Coprococcus	Unknown
PE08.bin.14	clu_38	115	2616660	35642	10930	235839	43.4	14.65	92.95	0	92.95	Bacteria	Firmicutes	Clostridia	Lachnospirales	Lachnospiraceae	Coprococcus	Coprococcus eutactus
PE04.bin.78	clu_38	20	2818590	210101	71839	468453	43.02	23.39	99.33	2.68	85.93	Bacteria	Firmicutes	Clostridia	Lachnospirales	Lachnospiraceae	Coprococcus	Coprococcus eutactus
PE07.bin.11	clu_39	52	2630570	84613	25076	266189	44.16	41.47	97.32	0.34	95.62	Bacteria	Firmicutes	Clostridia	Lachnospirales	Lachnospiraceae	Coprococcus	Coprococcus eutactus
CN11.bin.66	clu_39	185	2512512	21444	5950	82972	44.61	11.39	92.3	2.01	82.25	Bacteria	Firmicutes	Clostridia	Lachnospirales	Lachnospiraceae	Coprococcus	Coprococcus eutactus
PE23.bin.45	clu_39	164	2341885	20158	7190	100921	44.58	15.52	91.69	2.01	81.64	Bacteria	Firmicutes	Clostridia	Lachnospirales	Lachnospiraceae	Coprococcus	Coprococcus eutactus
CN29.bin.88	clu_40	151	2296677	22259	6843	80191	42.69	12.1	87.79	0.67	84.44	Bacteria	Firmicutes	Clostridia	Lachnospirales	Lachnospiraceae	TF01-11	Unknown
PE22.bin.6	clu_40	218	2227690	15098	4904	67981	42.99	26.43	89.57	0.68	86.17	Bacteria	Firmicutes	Clostridia	Lachnospirales	Lachnospiraceae	TF01-11	Unknown
CN06.bin.27	clu_40	81	2673081	80551	16074	208656	42.24	57.04	96.64	0	96.64	Bacteria	Firmicutes	Clostridia	Lachnospirales	Lachnospiraceae	TF01-11	Unknown
PE09.bin.16	clu_41	41	2422095	86187	28597	184908	44.92	21.62	96.35	0.34	94.65	Bacteria	Firmicutes	Clostridia	Lachnospirales	Lachnospiraceae	CAG-127	Unknown
CN11.bin.9	clu_41	198	2293560	17263	5763	47347	45.17	10.93	87.95	2.7	74.45	Bacteria	Firmicutes	Clostridia	Lachnospirales	Lachnospiraceae	CAG-127	Unknown
CN17.bin.91	clu_41	228	2386289	15138	4936	51737	44.99	11.16	90.94	1.34	84.24	Bacteria	Firmicutes	Clostridia	Lachnospirales	Lachnospiraceae	CAG-127	Unknown
CN03.bin.52	clu_42	70	2437750	54651	17170	239436	48.78	15.25	93.04	2.59	80.09	Bacteria	Firmicutes	Clostridia	Lachnospirales	Lachnospiraceae	Clostridium	Unknown
CN36.bin.44	clu_42	45	2572920	101092	23533	191772	48.99	26.72	98.1	0	98.1	Bacteria	Firmicutes	Clostridia	Lachnospirales	Lachnospiraceae	Clostridium	Unknown
PE10.bin.1	clu_42	130	2478461	24356	10721	99699	49.59	16.55	98.42	0.63	95.27	Bacteria	Firmicutes	Clostridia	Lachnospirales	Lachnospiraceae	Clostridium	Unknown
CN14.bin.28	clu_43	102	2769886	43341	12954	140299	49.02	14.32	97.47	0.95	92.72	Bacteria	Firmicutes	Clostridia	Lachnospirales	Lachnospiraceae	UBA9502	Unknown
CN20.bin.37	clu_44	35	1999323	73529	31425	294493	45.21	79.3	86.71	0	86.71	Bacteria	Firmicutes	Clostridia	Lachnospirales	Lachnospiraceae	UMGS1375	Unknown
CN34.bin.86	clu_44	62	2492697	53661	18240	334400	44.64	20.87	98.1	0.63	94.95	Bacteria	Firmicutes	Clostridia	Lachnospirales	Lachnospiraceae	UMGS1375	Unknown
PE23.bin.19	clu_44	221	2392203	15260	4989	55440	44.79	23.97	78.21	2.11	67.66	Bacteria	Firmicutes	Clostridia	Lachnospirales	Lachnospiraceae	UMGS1375	Unknown
CN27.bin.46	clu_44	214	1864446	12586	4130	54535	45.27	9.62	74.76	1.27	68.41	Bacteria	Firmicutes	Clostridia	Lachnospirales	Lachnospiraceae	UMGS1375	Unknown
PE26.bin.51	clu_44	100	1743970	26543	9418	70533	45.45	13.22	80.14	2.04	69.94	Bacteria	Firmicutes	Clostridia	Lachnospirales	Lachnospiraceae	UMGS1375	Unknown
PE11.bin.2	clu_45	33	2288100	92691	42645	194835	48.14	35.88	73.42	0.63	70.27	Bacteria	Firmicutes	Clostridia	Lachnospirales	Lachnospiraceae	Fusicatenibacter	Fusicatenibacter saccharivorans
PE18.bin.6	clu_45	30	2863270	150126	49195	413263	47.7	458.65	84.39	3.8	65.39	Bacteria	Firmicutes	Clostridia	Lachnospirales	Lachnospiraceae	Fusicatenibacter	Fusicatenibacter saccharivorans
CN14.bin.31	clu_45	118	2139260	28579	8170	70826	49.27	113.64	82.81	1.27	76.46	Bacteria	Firmicutes	Clostridia	Lachnospirales	Lachnospiraceae	Fusicatenibacter	Fusicatenibacter saccharivorans
CN31.bin.47	clu_45	227	2379005	16281	4917	70778	49.08	24.44	92.62	1.79	83.67	Bacteria	Firmicutes	Clostridia	Lachnospirales	Lachnospiraceae	Fusicatenibacter	Fusicatenibacter saccharivorans
PE34.bin.38	clu_45	46	2704795	80148	31907	240774	48.16	16.76	94.94	0.63	91.79	Bacteria	Firmicutes	Clostridia	Lachnospirales	Lachnospiraceae	Fusicatenibacter	Fusicatenibacter saccharivorans
CN17.bin.14	clu_45	51	2715778	85089	30777	175625	48.27	24.75	90.72	1.29	84.27	Bacteria	Firmicutes	Clostridia	Lachnospirales	Lachnospiraceae	Fusicatenibacter	Fusicatenibacter saccharivorans
CN16.bin.13	clu_45	39	2868822	110978	46459	245726	48.23	21.35	97.05	0.63	93.9	Bacteria	Firmicutes	Clostridia	Lachnospirales	Lachnospiraceae	Fusicatenibacter	Fusicatenibacter saccharivorans
PE08.bin.11	clu_45	42	2925163	88088	36182	336493	48.24	32.49	98.95	0.63	95.8	Bacteria	Firmicutes	Clostridia	Lachnospirales	Lachnospiraceae	Fusicatenibacter	Fusicatenibacter saccharivorans
PE28.bin.15	clu_45	46	3095570	101745	36828	246007	48.11	125.91	98.95	3.8	79.95	Bacteria	Firmicutes	Clostridia	Lachnospirales	Lachnospiraceae	Fusicatenibacter	Fusicatenibacter saccharivorans
PE25.bin.14	clu_45	39	2740986	105108	39480	199812	48.46	32.32	95.78	0.63	92.63	Bacteria	Firmicutes	Clostridia	Lachnospirales	Lachnospiraceae	Fusicatenibacter	Fusicatenibacter saccharivorans
PE36.bin.27	clu_45	27	2772760	151463	58786	347083	48.37	91.05	95.78	1.27	89.43	Bacteria	Firmicutes	Clostridia	Lachnospirales	Lachnospiraceae	Fusicatenibacter	Fusicatenibacter saccharivorans
CN06.bin.37	clu_45	73	2830804	65849	19298	188405	48.47	24.24	98.31	0.81	94.26	Bacteria	Firmicutes	Clostridia	Lachnospirales	Lachnospiraceae	Fusicatenibacter	Fusicatenibacter saccharivorans
PE37.bin.31	clu_45	33	2869390	117187	46623	420979	48.17	394.15	95.57	2.11	85.02	Bacteria	Firmicutes	Clostridia	Lachnospirales	Lachnospiraceae	Fusicatenibacter	Fusicatenibacter saccharivorans
PE35.bin.57	clu_45	38	2726213	88499	44580	252041	48.26	53.43	92.62	0.84	88.42	Bacteria	Firmicutes	Clostridia	Lachnospirales	Lachnospiraceae	Fusicatenibacter	Fusicatenibacter saccharivorans
PE26.bin.25	clu_45	45	2790322	87495	32911	349904	48.41	29.18	93.88	1.27	87.53	Bacteria	Firmicutes	Clostridia	Lachnospirales	Lachnospiraceae	Fusicatenibacter	Fusicatenibacter saccharivorans
PE13.bin.16	clu_45	42	2865944	105996	33288	262287	48.21	27.01	97.05	1.27	90.7	Bacteria	Firmicutes	Clostridia	Lachnospirales	Lachnospiraceae	Fusicatenibacter	Fusicatenibacter saccharivorans
PE33.bin.49	clu_45	50	2730143	66967	26084	248916	48.61	60.01	98.31	1.54	90.61	Bacteria	Firmicutes	Clostridia	Lachnospirales	Lachnospiraceae	Fusicatenibacter	Fusicatenibacter saccharivorans
CN07.bin.60	clu_45	266	2491938	12927	4391	78383	49.03	26.69	86.5	4.08	66.1	Bacteria	Firmicutes	Clostridia	Lachnospirales	Lachnospiraceae	Fusicatenibacter	Fusicatenibacter saccharivorans
CN20.bin.39	clu_45	23	2654160	147874	71997	373605	48.36	47.41	88.19	0	88.19	Bacteria	Firmicutes	Clostridia	Lachnospirales	Lachnospiraceae	Fusicatenibacter	Fusicatenibacter saccharivorans
CN21.bin.59	clu_45	165	2716398	24564	7533	117350	48.82	20.73	96.41	1.27	90.06	Bacteria	Firmicutes	Clostridia	Lachnospirales	Lachnospiraceae	Fusicatenibacter	Fusicatenibacter saccharivorans
PE06.bin.5	clu_45	139	2583008	26869	8552	90059	48.95	41.76	95.72	4.01	75.67	Bacteria	Firmicutes	Clostridia	Lachnospirales	Lachnospiraceae	Fusicatenibacter	Fusicatenibacter saccharivorans
CN09.bin.14	clu_45	181	2469450	21164	6210	71235	49.2	14.42	90.24	1.34	83.54	Bacteria	Firmicutes	Clostridia	Lachnospirales	Lachnospiraceae	Fusicatenibacter	Fusicatenibacter saccharivorans
CN05.bin.9	clu_45	260	2368317	13303	4265	51193	49.18	16.92	84.53	1.11	78.98	Bacteria	Firmicutes	Clostridia	Lachnospirales	Lachnospiraceae	Fusicatenibacter	Fusicatenibacter saccharivorans
PE07.bin.8	clu_45	78	2859592	50856	20148	174992	48.33	58.12	97.68	1.51	90.13	Bacteria	Firmicutes	Clostridia	Lachnospirales	Lachnospiraceae	Fusicatenibacter	Fusicatenibacter saccharivorans
PE09.bin.110	clu_45	208	2349682	17825	4593	64350	49.43	12.41	90.81	4.43	68.66	Bacteria	Firmicutes	Clostridia	Lachnospirales	Lachnospiraceae	Fusicatenibacter	Fusicatenibacter saccharivorans
PE21.bin.47	clu_45	314	2074579	8625	3129	32202	49.77	10.22	78.69	4.11	58.14	Bacteria	Firmicutes	Clostridia	Lachnospirales	Lachnospiraceae	Fusicatenibacter	Fusicatenibacter saccharivorans
PE06.bin.48	clu_46	300	2312619	10524	3584	41254	50.82	14.07	82.39	2.22	71.29	Bacteria	Firmicutes	Clostridia	Lachnospirales	Lachnospiraceae	UBA7160	Unknown
PE30.bin.70	clu_46	282	2253723	10479	4032	34376	50.79	22.74	73.33	0	73.33	Bacteria	Firmicutes	Clostridia	Lachnospirales	Lachnospiraceae	UBA7160	Unknown
PE36.bin.86	clu_47	111	3055663	38165	15684	135920	48.31	23.62	93.04	1.9	83.54	Bacteria	Firmicutes	Clostridia	Lachnospirales	Lachnospiraceae	UBA7160	Unknown
CN07.bin.1	clu_48	72	2608538	58476	22704	160410	37.04	135.39	91.95	3.36	75.15	Bacteria	Firmicutes	Clostridia	Lachnospirales	Lachnospiraceae	Anaerostipes	Anaerostipes hadrus
CN09.bin.44	clu_48	336	1906284	6917	2856	44433	37.97	8.89	83.8	1.4	76.8	Bacteria	Firmicutes	Clostridia	Lachnospirales	Lachnospiraceae	Anaerostipes	Anaerostipes hadrus
PE19.bin.37	clu_48	180	2457300	18999	6246	64450	37.27	27.49	96.72	2.68	83.32	Bacteria	Firmicutes	Clostridia	Lachnospirales	Lachnospiraceae	Anaerostipes	Anaerostipes hadrus
PE37.bin.28	clu_48	118	2746375	35168	11454	131271	37.19	43.36	97.99	4.05	77.74	Bacteria	Firmicutes	Clostridia	Lachnospirales	Lachnospiraceae	Anaerostipes	Anaerostipes hadrus
CN27.bin.18	clu_48	109	2521203	41089	10823	139310	37.38	88.92	97.32	2.01	87.27	Bacteria	Firmicutes	Clostridia	Lachnospirales	Lachnospiraceae	Anaerostipes	Anaerostipes hadrus
PE39.bin.10	clu_48	149	2657019	28017	7739	103498	37.11	42.72	92.84	4.36	71.04	Bacteria	Firmicutes	Clostridia	Lachnospirales	Lachnospiraceae	Anaerostipes	Anaerostipes hadrus
PE21.bin.40	clu_48	608	3721698	8114	2670	94403	36.9	9.19	95.75	3.58	77.85	Bacteria	Firmicutes	Clostridia	Lachnospirales	Lachnospiraceae	Anaerostipes	Anaerostipes hadrus
PE04.bin.28	clu_48	63	2384249	57735	19374	161520	37.02	24.6	90.6	1.34	83.9	Bacteria	Firmicutes	Clostridia	Lachnospirales	Lachnospiraceae	Anaerostipes	Anaerostipes hadrus
PE13.bin.13	clu_48	56	2588486	62531	27291	112175	37.12	107.84	95.3	1.34	88.6	Bacteria	Firmicutes	Clostridia	Lachnospirales	Lachnospiraceae	Anaerostipes	Anaerostipes hadrus
CN03.bin.72	clu_48	61	2506627	80912	20633	159725	36.97	52.65	82.55	0.67	79.2	Bacteria	Firmicutes	Clostridia	Lachnospirales	Lachnospiraceae	Anaerostipes	Anaerostipes hadrus
PE32.bin.54	clu_48	108	2822626	49202	12019	141653	36.86	19.38	94.63	1.34	87.93	Bacteria	Firmicutes	Clostridia	Lachnospirales	Lachnospiraceae	Anaerostipes	Anaerostipes hadrus
PE27.bin.17	clu_48	60	2836258	80871	26536	175094	36.94	144.64	99.33	1.34	92.63	Bacteria	Firmicutes	Clostridia	Lachnospirales	Lachnospiraceae	Anaerostipes	Anaerostipes hadrus
PE08.bin.6	clu_48	139	2385964	30188	7440	73521	37.47	14.9	94.63	1.34	87.93	Bacteria	Firmicutes	Clostridia	Lachnospirales	Lachnospiraceae	Anaerostipes	Anaerostipes hadrus
CN02.bin.18	clu_48	185	2503812	19620	6801	86937	37.44	38.01	96.98	1.57	89.13	Bacteria	Firmicutes	Clostridia	Lachnospirales	Lachnospiraceae	Anaerostipes	Anaerostipes hadrus
PE38.bin.78	clu_48	75	2751988	65767	19583	150834	36.95	61.45	96.64	1.34	89.94	Bacteria	Firmicutes	Clostridia	Lachnospirales	Lachnospiraceae	Anaerostipes	Anaerostipes hadrus
PE20.bin.7	clu_48	82	2678166	46205	19491	178292	36.98	16.4	95.3	1.34	88.6	Bacteria	Firmicutes	Clostridia	Lachnospirales	Lachnospiraceae	Anaerostipes	Anaerostipes hadrus
CN28.bin.7	clu_48	291	2304682	10741	3815	55246	37.41	12.54	87	3.24	70.8	Bacteria	Firmicutes	Clostridia	Lachnospirales	Lachnospiraceae	Anaerostipes	Anaerostipes hadrus
CN15.bin.23	clu_48	48	2403111	82108	31498	167593	37.05	83.09	93.96	1.34	87.26	Bacteria	Firmicutes	Clostridia	Lachnospirales	Lachnospiraceae	Anaerostipes	Anaerostipes hadrus
PE36.bin.8	clu_48	168	2019511	17614	5504	95191	37.66	36.95	74.56	3.51	57.01	Bacteria	Firmicutes	Clostridia	Lachnospirales	Lachnospiraceae	Anaerostipes	Anaerostipes hadrus
PE40.bin.20	clu_48	67	2576844	67149	20167	315521	37.22	30.59	97.32	1.34	90.62	Bacteria	Firmicutes	Clostridia	Lachnospirales	Lachnospiraceae	Anaerostipes	Anaerostipes hadrus
PE01.bin.38	clu_48	438	2152828	5900	2454	34479	37.28	8.72	71.22	2.91	56.67	Bacteria	Firmicutes	Clostridia	Lachnospirales	Lachnospiraceae	Anaerostipes	Anaerostipes hadrus
PE22.bin.19	clu_48	64	2638346	70245	21914	196742	37.23	74.4	96.31	2.01	86.26	Bacteria	Firmicutes	Clostridia	Lachnospirales	Lachnospiraceae	Anaerostipes	Anaerostipes hadrus
CN21.bin.52	clu_48	158	2348949	21759	7332	72253	37.36	43.91	92.62	0.67	89.27	Bacteria	Firmicutes	Clostridia	Lachnospirales	Lachnospiraceae	Anaerostipes	Anaerostipes hadrus
CN32.bin.18	clu_48	259	2047414	10576	3679	42626	37.67	12.79	86.53	2.68	73.13	Bacteria	Firmicutes	Clostridia	Lachnospirales	Lachnospiraceae	Anaerostipes	Anaerostipes hadrus
CN35.bin.27	clu_48	133	2129941	28072	7352	103526	37.36	197.57	92.62	0.67	89.27	Bacteria	Firmicutes	Clostridia	Lachnospirales	Lachnospiraceae	Anaerostipes	Anaerostipes hadrus
CN08.bin.31	clu_48	270	2015015	9772	3452	50287	37.65	13.07	83.05	3.94	63.35	Bacteria	Firmicutes	Clostridia	Lachnospirales	Lachnospiraceae	Anaerostipes	Anaerostipes hadrus
CN06.bin.71	clu_48	196	2379527	19659	5544	53026	37.35	18.29	94.96	3.02	79.86	Bacteria	Firmicutes	Clostridia	Lachnospirales	Lachnospiraceae	Anaerostipes	Anaerostipes hadrus
CN22.bin.51	clu_48	103	2662406	39722	14909	102931	37.24	133.32	96.68	3.36	79.88	Bacteria	Firmicutes	Clostridia	Lachnospirales	Lachnospiraceae	Anaerostipes	Anaerostipes hadrus
PE26.bin.12	clu_48	297	2211555	9564	3629	54879	37.56	9.81	87.91	3.36	71.11	Bacteria	Firmicutes	Clostridia	Lachnospirales	Lachnospiraceae	Anaerostipes	Anaerostipes hadrus
CN34.bin.13	clu_48	47	2370681	76902	31009	200674	37.14	191.64	89.93	2.01	79.88	Bacteria	Firmicutes	Clostridia	Lachnospirales	Lachnospiraceae	Anaerostipes	Anaerostipes hadrus
CN10.bin.29	clu_48	331	2300701	8568	3466	46634	37.43	28.25	89.62	4.48	67.22	Bacteria	Firmicutes	Clostridia	Lachnospirales	Lachnospiraceae	Anaerostipes	Anaerostipes hadrus
PE16.bin.12	clu_48	400	2305919	7693	2589	60163	37.24	12.56	77.56	4.75	53.81	Bacteria	Firmicutes	Clostridia	Lachnospirales	Lachnospiraceae	Anaerostipes	Anaerostipes hadrus
PE27.bin.43	clu_49	82	3043104	62687	16997	197599	37.88	126.87	95.97	1.34	89.27	Bacteria	Firmicutes	Clostridia	Lachnospirales	Lachnospiraceae	Anaerobutyricum	Anaerobutyricum hallii
PE36.bin.65	clu_49	77	2866116	59215	21529	299480	37.97	115.88	95.3	1.34	88.6	Bacteria	Firmicutes	Clostridia	Lachnospirales	Lachnospiraceae	Anaerobutyricum	Anaerobutyricum hallii
CN02.bin.54	clu_49	82	3140229	68252	22147	182357	37.8	87.43	97.99	1.34	91.29	Bacteria	Firmicutes	Clostridia	Lachnospirales	Lachnospiraceae	Anaerobutyricum	Anaerobutyricum hallii
CN08.bin.6	clu_49	236	3353339	23580	5624	124778	37.64	40.17	89.93	3.58	72.03	Bacteria	Firmicutes	Clostridia	Lachnospirales	Lachnospiraceae	Anaerobutyricum	Anaerobutyricum hallii
CN35.bin.56	clu_49	166	2573343	25815	6883	145414	37.74	20.36	75.61	3.51	58.06	Bacteria	Firmicutes	Clostridia	Lachnospirales	Lachnospiraceae	Anaerobutyricum	Anaerobutyricum hallii
PE37.bin.23	clu_50	228	3424549	24107	6878	174888	38.4	22.12	95.97	4.7	72.47	Bacteria	Firmicutes	Clostridia	Lachnospirales	Lachnospiraceae	Anaerobutyricum	Anaerobutyricum hallii
PE08.bin.31	clu_50	135	3293508	46039	11781	171418	38.21	30.41	97.99	1.34	91.29	Bacteria	Firmicutes	Clostridia	Lachnospirales	Lachnospiraceae	Anaerobutyricum	Anaerobutyricum hallii
CN14.bin.1	clu_50	117	3089007	49367	13297	172442	38.19	80.15	92.62	2.35	80.87	Bacteria	Firmicutes	Clostridia	Lachnospirales	Lachnospiraceae	Anaerobutyricum	Anaerobutyricum hallii
PE21.bin.39	clu_50	120	3035875	40334	14531	125164	38.2	50.99	97.99	0.67	94.64	Bacteria	Firmicutes	Clostridia	Lachnospirales	Lachnospiraceae	Anaerobutyricum	Anaerobutyricum hallii
PE28.bin.77	clu_50	122	2930222	44984	11248	147196	38.21	15.75	95.97	0.67	92.62	Bacteria	Firmicutes	Clostridia	Lachnospirales	Lachnospiraceae	Anaerobutyricum	Anaerobutyricum hallii
CN03.bin.10	clu_50	188	2640101	27295	5815	120406	38.49	39.61	73.91	1.01	68.86	Bacteria	Firmicutes	Clostridia	Lachnospirales	Lachnospiraceae	Anaerobutyricum	Anaerobutyricum hallii
PE05.bin.55	clu_50	94	3265771	81792	16779	170103	38.14	78.72	95.97	1.34	89.27	Bacteria	Firmicutes	Clostridia	Lachnospirales	Lachnospiraceae	Anaerobutyricum	Anaerobutyricum hallii
CN20.bin.58	clu_50	72	2857511	86491	17334	209775	38.42	252.49	92.62	0.67	89.27	Bacteria	Firmicutes	Clostridia	Lachnospirales	Lachnospiraceae	Anaerobutyricum	Anaerobutyricum hallii
PE30.bin.54	clu_50	244	3357894	24993	6164	77041	38.2	110.08	97.34	3.19	81.39	Bacteria	Firmicutes	Clostridia	Lachnospirales	Lachnospiraceae	Anaerobutyricum	Anaerobutyricum hallii
CN26.bin.48	clu_50	112	2856921	48554	11750	181391	38.25	57.57	77.18	0.67	73.83	Bacteria	Firmicutes	Clostridia	Lachnospirales	Lachnospiraceae	Anaerobutyricum	Anaerobutyricum hallii
CN15.bin.50	clu_50	86	3001844	61545	17282	156384	38.46	77.71	94.63	2.01	84.58	Bacteria	Firmicutes	Clostridia	Lachnospirales	Lachnospiraceae	Anaerobutyricum	Anaerobutyricum hallii
PE20.bin.18	clu_50	183	4310283	47108	10515	175065	38.23	55.46	95.97	4.7	72.47	Bacteria	Firmicutes	Clostridia	Lachnospirales	Lachnospiraceae	Anaerobutyricum	Anaerobutyricum hallii
PE09.bin.19	clu_50	108	2898336	61576	15656	177858	38.26	84.93	93.96	1.74	85.26	Bacteria	Firmicutes	Clostridia	Lachnospirales	Lachnospiraceae	Anaerobutyricum	Anaerobutyricum hallii
PE13.bin.21	clu_50	248	4323001	39488	6721	162094	38	87.51	95.97	4.03	75.82	Bacteria	Firmicutes	Clostridia	Lachnospirales	Lachnospiraceae	Anaerobutyricum	Anaerobutyricum hallii
CN31.bin.2	clu_50	296	2482086	11215	3814	69147	38.64	10.89	72.85	2.63	59.7	Bacteria	Firmicutes	Clostridia	Lachnospirales	Lachnospiraceae	Anaerobutyricum	Anaerobutyricum hallii
CN36.bin.45	clu_51	284	3212765	17128	4766	61642	41.15	23.44	84.21	0	84.21	Bacteria	Firmicutes	Clostridia	Lachnospirales	Lachnospiraceae	KLE1615	Unknown
CN25.bin.103	clu_51	372	4247231	15605	5550	89359	40.35	12.5	87.42	4.66	64.12	Bacteria	Firmicutes	Clostridia	Lachnospirales	Lachnospiraceae	KLE1615	Unknown
CN03.bin.35	clu_52	66	2308749	51430	21321	131963	41.86	16.05	93.96	0.19	93.01	Bacteria	Firmicutes	Clostridia	Lachnospirales	Lachnospiraceae	Mediterraneibacter	Mediterraneibacter torques
CN02.bin.33	clu_52	66	2412965	54140	16390	213601	41.68	61.33	91.23	1.17	85.38	Bacteria	Firmicutes	Clostridia	Lachnospirales	Lachnospiraceae	Mediterraneibacter	Mediterraneibacter torques
CN27.bin.62	clu_52	89	2315373	37547	13879	108296	41.98	13.9	93.47	0.58	90.57	Bacteria	Firmicutes	Clostridia	Lachnospirales	Lachnospiraceae	Mediterraneibacter	Mediterraneibacter torques
CN36.bin.58	clu_52	76	2242639	43850	15080	121060	41.68	16.4	92.98	0	92.98	Bacteria	Firmicutes	Clostridia	Lachnospirales	Lachnospiraceae	Mediterraneibacter	Mediterraneibacter torques
PE05.bin.45	clu_52	57	2364721	82091	17564	181836	41.73	21.82	95.91	0.58	93.01	Bacteria	Firmicutes	Clostridia	Lachnospirales	Lachnospiraceae	Mediterraneibacter	Mediterraneibacter torques
CN14.bin.43	clu_52	175	2276649	18349	5752	73475	41.89	11.36	97.47	2.29	86.02	Bacteria	Firmicutes	Clostridia	Lachnospirales	Lachnospiraceae	Mediterraneibacter	Mediterraneibacter torques
PE28.bin.36	clu_52	55	2078261	67227	19438	104973	42.18	44.78	83.82	0	83.82	Bacteria	Firmicutes	Clostridia	Lachnospirales	Lachnospiraceae	Mediterraneibacter	Mediterraneibacter torques
PE26.bin.53	clu_52	39	1754447	58385	23464	182502	42.72	29.57	70.76	0.58	67.86	Bacteria	Firmicutes	Clostridia	Lachnospirales	Lachnospiraceae	Mediterraneibacter	Mediterraneibacter torques
CN17.bin.95	clu_52	60	2427557	70326	17848	213393	41.71	26.36	98.83	0	98.83	Bacteria	Firmicutes	Clostridia	Lachnospirales	Lachnospiraceae	Mediterraneibacter	Mediterraneibacter torques
CN25.bin.53	clu_52	46	1988268	61962	23261	304073	42.29	19.17	79.14	0.58	76.24	Bacteria	Firmicutes	Clostridia	Lachnospirales	Lachnospiraceae	Mediterraneibacter	Mediterraneibacter torques
CN04.bin.2	clu_52	264	1858831	8890	3543	35349	42.55	8.49	79.85	1.17	74	Bacteria	Firmicutes	Clostridia	Lachnospirales	Lachnospiraceae	Mediterraneibacter	Mediterraneibacter torques
PE12.bin.59	clu_52	217	2071350	13877	4555	47613	42.33	21.59	89.43	2.76	75.63	Bacteria	Firmicutes	Clostridia	Lachnospirales	Lachnospiraceae	Mediterraneibacter	Mediterraneibacter torques
CN07.bin.15	clu_52	359	1736972	5609	2649	17584	42.23	18.86	80.78	0.7	77.28	Bacteria	Firmicutes	Clostridia	Lachnospirales	Lachnospiraceae	Mediterraneibacter	Mediterraneibacter torques
CN15.bin.24	clu_52	313	1847752	7098	3163	23191	42.08	8.51	81.66	0.19	80.71	Bacteria	Firmicutes	Clostridia	Lachnospirales	Lachnospiraceae	Mediterraneibacter	Mediterraneibacter torques
CN31.bin.3	clu_52	39	2299199	102141	25448	294406	41.86	343.95	93.57	0	93.57	Bacteria	Firmicutes	Clostridia	Lachnospirales	Lachnospiraceae	Mediterraneibacter	Mediterraneibacter torques
CN04.bin.4	clu_53	178	2602987	24447	7289	78087	46.35	16.37	94.74	1.27	88.39	Bacteria	Firmicutes	Clostridia	Lachnospirales	Lachnospiraceae	Schaedlerella	Schaedlerella glycyrrhizinilyticum
CN34.bin.63	clu_53	59	2880225	93626	25831	259318	45.98	13.05	97.95	0.58	95.05	Bacteria	Firmicutes	Clostridia	Lachnospirales	Lachnospiraceae	Schaedlerella	Schaedlerella glycyrrhizinilyticum
CN26.bin.30	clu_54	23	2931974	221013	72973	607256	45.12	24.08	94.15	1.66	85.85	Bacteria	Firmicutes	Clostridia	Lachnospirales	Lachnospiraceae	Sellimonas	Sellimonas intestinalis
CN01.bin.2	clu_54	38	2996699	103641	48867	315214	45.45	43.06	98.64	1.85	89.39	Bacteria	Firmicutes	Clostridia	Lachnospirales	Lachnospiraceae	Sellimonas	Sellimonas intestinalis
PE28.bin.95	clu_54	23	3101379	189020	85597	415486	45.15	22.95	98.83	0.88	94.43	Bacteria	Firmicutes	Clostridia	Lachnospirales	Lachnospiraceae	Sellimonas	Sellimonas intestinalis
CN17.bin.42	clu_54	38	2306582	78261	36691	214990	46.5	20.55	87.72	0.88	83.32	Bacteria	Firmicutes	Clostridia	Lachnospirales	Lachnospiraceae	Sellimonas	Sellimonas intestinalis
PE32.bin.22	clu_54	160	2582290	24404	7301	91288	46.22	10.72	89.58	0.78	85.68	Bacteria	Firmicutes	Clostridia	Lachnospirales	Lachnospiraceae	Sellimonas	Sellimonas intestinalis
CN20.bin.66	clu_54	358	2285193	7393	3429	22248	46.4	8.56	79.11	2.44	66.91	Bacteria	Firmicutes	Clostridia	Lachnospirales	Lachnospiraceae	Sellimonas	Sellimonas intestinalis
PE26.bin.43	clu_55	45	2432462	92653	38669	237661	38.56	33.23	82.8	0	82.8	Bacteria	Firmicutes	Clostridia	Lachnospirales	Lachnospiraceae	Blautia	Unknown
PE18.bin.10	clu_55	98	3214530	88959	13996	445107	38.32	130.11	96.18	1.11	90.63	Bacteria	Firmicutes	Clostridia	Lachnospirales	Lachnospiraceae	Blautia	Unknown
CN21.bin.63	clu_55	93	2101734	44068	10824	153841	38.57	14.97	85.51	2.6	72.51	Bacteria	Firmicutes	Clostridia	Lachnospirales	Lachnospiraceae	Blautia	Unknown
CN25.bin.2	clu_56	69	2454048	88456	15515	256778	42.08	14.76	90.19	0.63	87.04	Bacteria	Firmicutes	Clostridia	Lachnospirales	Lachnospiraceae	Faecalimonas	Faecalimonas umbilicata
CN04.bin.77	clu_56	120	2688438	46177	8780	163093	41.97	15.39	85.44	1.9	75.94	Bacteria	Firmicutes	Clostridia	Lachnospirales	Lachnospiraceae	Faecalimonas	Faecalimonas umbilicata
PE37.bin.39	clu_56	40	2191990	81101	32172	224873	42.19	36.15	86.71	0	86.71	Bacteria	Firmicutes	Clostridia	Lachnospirales	Lachnospiraceae	Faecalimonas	Faecalimonas umbilicata
PE11.bin.9	clu_56	37	2658892	123864	31249	298279	41.89	88.67	99.23	0	99.23	Bacteria	Firmicutes	Clostridia	Lachnospirales	Lachnospiraceae	Faecalimonas	Faecalimonas umbilicata
PE24.bin.18	clu_56	70	2344566	53454	15999	124135	42.26	235.02	94.62	0.63	91.47	Bacteria	Firmicutes	Clostridia	Lachnospirales	Lachnospiraceae	Faecalimonas	Faecalimonas umbilicata
PE10.bin.8	clu_56	31	2168336	126215	51692	242617	42.41	91.48	85.44	0.63	82.29	Bacteria	Firmicutes	Clostridia	Lachnospirales	Lachnospiraceae	Faecalimonas	Faecalimonas umbilicata
CN37.bin.59	clu_56	187	1920293	14603	4507	88194	42.7	10.53	86.62	1.58	78.72	Bacteria	Firmicutes	Clostridia	Lachnospirales	Lachnospiraceae	Faecalimonas	Faecalimonas umbilicata
PE39.bin.26	clu_56	243	2076406	11316	4191	48684	42.67	24.6	87.95	4.17	67.1	Bacteria	Firmicutes	Clostridia	Lachnospirales	Lachnospiraceae	Faecalimonas	Faecalimonas umbilicata
CN04.bin.53	clu_57	192	2679189	21507	6625	71602	47.57	12.58	92.84	2.34	81.14	Bacteria	Firmicutes	Clostridia	Lachnospirales	Lachnospiraceae	Dorea	Dorea scindens
CN26.bin.56	clu_57	265	2248198	11250	4158	60640	48.16	9.63	86.85	0.71	83.3	Bacteria	Firmicutes	Clostridia	Lachnospirales	Lachnospiraceae	Dorea	Dorea scindens
CN01.bin.1	clu_58	15	3864820	301997	156883	692054	47.44	28.42	98.83	0	98.83	Bacteria	Firmicutes	Clostridia	Lachnospirales	Lachnospiraceae	Dorea	Unknown
CN14.bin.29	clu_58	117	3548847	45284	14620	189995	47.87	11.85	94.93	0.58	92.03	Bacteria	Firmicutes	Clostridia	Lachnospirales	Lachnospiraceae	Dorea	Unknown
CN34.bin.43	clu_58	308	3368219	14796	5300	52506	48.15	8.92	92.9	1.66	84.6	Bacteria	Firmicutes	Clostridia	Lachnospirales	Lachnospiraceae	Dorea	Unknown
PE38.bin.49	clu_58	184	2334711	16096	6713	48260	49.07	15.05	71.16	0	71.16	Bacteria	Firmicutes	Clostridia	Lachnospirales	Lachnospiraceae	Dorea	Unknown
PE27.bin.10	clu_58	19	3846443	279120	100966	566795	47.61	35.78	98.83	0.1	98.33	Bacteria	Firmicutes	Clostridia	Lachnospirales	Lachnospiraceae	Dorea	Unknown
PE37.bin.36	clu_58	175	3149506	31190	7286	140220	48.5	12.38	86.95	0.78	83.05	Bacteria	Firmicutes	Clostridia	Lachnospirales	Lachnospiraceae	Dorea	Unknown
CN08.bin.36	clu_58	454	3057302	8374	3285	29198	48.63	10.89	86.52	0.88	82.12	Bacteria	Firmicutes	Clostridia	Lachnospirales	Lachnospiraceae	Dorea	Unknown
CN37.bin.60	clu_59	41	2568424	128157	30100	323951	40.47	41.05	93.67	0	93.67	Bacteria	Firmicutes	Clostridia	Lachnospirales	Lachnospiraceae	Faecalimonas	Faecalimonas nexilis
CN33.bin.18	clu_59	56	2373976	84788	26257	211080	40.37	32.79	92.41	0.95	87.66	Bacteria	Firmicutes	Clostridia	Lachnospirales	Lachnospiraceae	Faecalimonas	Faecalimonas nexilis
PE32.bin.31	clu_59	46	2299416	111739	25548	182963	40.56	28.54	91.77	0.63	88.62	Bacteria	Firmicutes	Clostridia	Lachnospirales	Lachnospiraceae	Faecalimonas	Faecalimonas nexilis
PE25.bin.16	clu_59	236	3152078	29931	4804	127880	40.23	19.4	97.47	1.27	91.12	Bacteria	Firmicutes	Clostridia	Lachnospirales	Lachnospiraceae	Faecalimonas	Faecalimonas nexilis
PE10.bin.34	clu_59	153	2297469	26402	7702	86400	40.92	23.26	95.59	1.9	86.09	Bacteria	Firmicutes	Clostridia	Lachnospirales	Lachnospiraceae	Faecalimonas	Faecalimonas nexilis
CN34.bin.72	clu_60	24	1971376	131430	39479	222667	42.14	27.52	80.7	0	80.7	Bacteria	Firmicutes	Clostridia	Lachnospirales	Lachnospiraceae	Dorea	Unknown
PE27.bin.16	clu_60	49	1490865	48364	15508	123366	42.56	14.71	76.94	0.19	75.99	Bacteria	Firmicutes	Clostridia	Lachnospirales	Lachnospiraceae	Dorea	Unknown
PE22.bin.27	clu_61	87	2117566	39086	12218	94520	43.29	129.24	94.15	2.34	82.45	Bacteria	Firmicutes	Clostridia	Lachnospirales	Lachnospiraceae	Mediterraneibacter	Mediterraneibacter lactaris
CN14.bin.23	clu_61	69	2097956	45878	14473	110192	43.05	33.17	92.8	0	92.8	Bacteria	Firmicutes	Clostridia	Lachnospirales	Lachnospiraceae	Mediterraneibacter	Mediterraneibacter lactaris
CN21.bin.24	clu_61	78	1948520	39274	12643	145299	43.49	19.82	91.55	0.92	86.95	Bacteria	Firmicutes	Clostridia	Lachnospirales	Lachnospiraceae	Mediterraneibacter	Mediterraneibacter lactaris
CN04.bin.28	clu_61	97	2381982	39109	12562	129319	42.78	90.2	92.4	0.58	89.5	Bacteria	Firmicutes	Clostridia	Lachnospirales	Lachnospiraceae	Mediterraneibacter	Mediterraneibacter lactaris
PE14.bin.7	clu_61	136	1648841	15390	5991	48846	44.13	13.53	83.37	2.92	68.77	Bacteria	Firmicutes	Clostridia	Lachnospirales	Lachnospiraceae	Mediterraneibacter	Mediterraneibacter lactaris
CN09.bin.31	clu_62	89	2101218	31392	12706	173954	41.41	16.22	87.43	0.58	84.53	Bacteria	Firmicutes	Clostridia	Lachnospirales	Lachnospiraceae	Mediterraneibacter	Mediterraneibacter faecis
CN07.bin.44	clu_62	64	1890531	47906	16619	93369	41.19	79.97	76.32	0.88	71.92	Bacteria	Firmicutes	Clostridia	Lachnospirales	Lachnospiraceae	Mediterraneibacter	Mediterraneibacter faecis
PE03.bin.50	clu_62	61	2501463	97349	18364	350428	40.88	40.14	89.18	1.75	80.43	Bacteria	Firmicutes	Clostridia	Lachnospirales	Lachnospiraceae	Mediterraneibacter	Mediterraneibacter faecis
CN31.bin.25	clu_62	59	2534959	82558	23157	194726	41	38.96	89.18	1.2	83.18	Bacteria	Firmicutes	Clostridia	Lachnospirales	Lachnospiraceae	Mediterraneibacter	Mediterraneibacter faecis
CN17.bin.104	clu_62	74	2587352	61705	16747	148837	40.95	29.87	90.96	1.75	82.21	Bacteria	Firmicutes	Clostridia	Lachnospirales	Lachnospiraceae	Mediterraneibacter	Mediterraneibacter faecis
CN04.bin.48	clu_63	53	2292313	78320	20941	176031	33.97	13.08	93.96	0.22	92.86	Bacteria	Firmicutes	Clostridia	Lachnospirales	Lachnospiraceae	Eubacterium	Eubacterium ventriosum
PE28.bin.81	clu_63	69	2727289	118233	22585	211826	34.09	59.03	99.33	0.67	95.98	Bacteria	Firmicutes	Clostridia	Lachnospirales	Lachnospiraceae	Eubacterium	Eubacterium ventriosum
CN27.bin.24	clu_63	26	2442481	136481	64077	366082	34.17	24.33	98.66	0	98.66	Bacteria	Firmicutes	Clostridia	Lachnospirales	Lachnospiraceae	Eubacterium	Eubacterium ventriosum
PE02.bin.48	clu_63	97	2440988	44315	12772	195099	33.92	15.08	93.29	1.36	86.49	Bacteria	Firmicutes	Clostridia	Lachnospirales	Lachnospiraceae	Eubacterium	Eubacterium ventriosum
CN25.bin.12	clu_63	16	2228984	166717	100366	255239	34.14	48.16	99.33	0	99.33	Bacteria	Firmicutes	Clostridia	Lachnospirales	Lachnospiraceae	Eubacterium	Eubacterium ventriosum
CN34.bin.19	clu_63	31	2436050	124721	39618	364887	34.11	27.64	99.33	0.67	95.98	Bacteria	Firmicutes	Clostridia	Lachnospirales	Lachnospiraceae	Eubacterium	Eubacterium ventriosum
CN36.bin.34	clu_63	101	2380791	37467	12617	150347	34.02	17.77	95.23	0	95.23	Bacteria	Firmicutes	Clostridia	Lachnospirales	Lachnospiraceae	Eubacterium	Eubacterium ventriosum
CN03.bin.34	clu_64	590	2981903	5941	2566	46571	33.43	8.01	73.33	1.75	64.58	Bacteria	Firmicutes	Clostridia	Lachnospirales	Lachnospiraceae	Eubacterium	Unknown
PE05.bin.37	clu_65	94	2461203	38336	12641	182329	38.86	12.46	90.35	0.34	88.65	Bacteria	Firmicutes	Clostridia	Lachnospirales	Lachnospiraceae	TF01-11	Unknown
PE04.bin.82	clu_66	140	3443330	49331	9457	272745	41.76	23.02	95.07	2.99	80.12	Bacteria	Firmicutes	Clostridia	Lachnospirales	Lachnospiraceae	Roseburia	Roseburia inulinivorans
PE05.bin.24	clu_66	103	3282962	64454	13950	127435	41.62	20.93	97.91	4.28	76.51	Bacteria	Firmicutes	Clostridia	Lachnospirales	Lachnospiraceae	Roseburia	Roseburia inulinivorans
PE29.bin.43	clu_66	103	2418093	35142	13276	96634	42.47	19.38	78.61	1.45	71.36	Bacteria	Firmicutes	Clostridia	Lachnospirales	Lachnospiraceae	Roseburia	Unknown
CN14.bin.72	clu_67	168	2905166	27924	7477	100083	42.75	22.03	77.19	0	77.19	Bacteria	Firmicutes	Clostridia	Lachnospirales	Lachnospiraceae	Eubacterium	Eubacterium ramulus
PE22.bin.26	clu_67	216	2860979	19737	6273	79100	42.94	77.41	95.21	2.01	85.16	Bacteria	Firmicutes	Clostridia	Lachnospirales	Lachnospiraceae	Eubacterium	Eubacterium ramulus
PE27.bin.22	clu_67	133	2673963	37178	9161	113867	42.85	39.81	91	1.44	83.8	Bacteria	Firmicutes	Clostridia	Lachnospirales	Lachnospiraceae	Eubacterium	Eubacterium ramulus
CN35.bin.42	clu_67	186	2899845	21987	7323	104168	42.79	50.94	88.53	3.24	72.33	Bacteria	Firmicutes	Clostridia	Lachnospirales	Lachnospiraceae	Eubacterium	Eubacterium ramulus
CN35.bin.52	clu_68	203	2601448	24703	5499	66431	43.55	11.73	74.49	0	74.49	Bacteria	Firmicutes	Clostridia	Lachnospirales	Lachnospiraceae	Eubacterium	Eubacterium ramulus
CN34.bin.22	clu_69	28	2153073	123046	48147	266276	43.42	19.76	91.72	2.92	77.12	Bacteria	Firmicutes	Clostridia	Lachnospirales	Lachnospiraceae	Dorea	Unknown
PE29.bin.89	clu_69	75	2136291	45790	14456	152150	43.76	18.75	85.54	1.75	76.79	Bacteria	Firmicutes	Clostridia	Lachnospirales	Lachnospiraceae	Dorea	Unknown
PE21.bin.11	clu_70	119	2222226	34843	8724	90803	40.36	14.1	78.41	0.7	74.91	Bacteria	Firmicutes	Clostridia	Lachnospirales	Lachnospiraceae	Dorea	Dorea formicigenerans
PE31.bin.20	clu_70	98	3224366	74491	15731	258551	40.51	21.11	91.23	0.58	88.33	Bacteria	Firmicutes	Clostridia	Lachnospirales	Lachnospiraceae	Dorea	Dorea formicigenerans
PE26.bin.31	clu_70	139	1987861	26921	5696	103306	40.57	12.95	70.02	2.1	59.52	Bacteria	Firmicutes	Clostridia	Lachnospirales	Lachnospiraceae	Dorea	Dorea formicigenerans
PE13.bin.31	clu_70	54	2658135	90948	25003	560520	40.98	49.07	98.68	2.92	84.08	Bacteria	Firmicutes	Clostridia	Lachnospirales	Lachnospiraceae	Dorea	Dorea formicigenerans
PE25.bin.22	clu_70	244	2474085	16301	3905	68519	41.29	12.31	93.33	1.6	85.33	Bacteria	Firmicutes	Clostridia	Lachnospirales	Lachnospiraceae	Dorea	Dorea formicigenerans
PE03.bin.45	clu_70	186	3030916	39574	5782	155406	40.29	16.6	89.47	2.99	74.52	Bacteria	Firmicutes	Clostridia	Lachnospirales	Lachnospiraceae	Dorea	Dorea formicigenerans
PE20.bin.13	clu_71	118	2560380	31627	10273	156288	42.9	12.54	94.74	0.61	91.69	Bacteria	Firmicutes	Clostridia	Lachnospirales	Lachnospiraceae	Bariatricus	Bariatricus comes
PE35.bin.8	clu_71	65	2209338	58534	18413	164950	42.59	44.93	82.07	0.03	81.92	Bacteria	Firmicutes	Clostridia	Lachnospirales	Lachnospiraceae	Bariatricus	Bariatricus comes
CN34.bin.100	clu_71	68	2802868	69036	21854	174445	42.67	41.05	92.98	4.68	69.58	Bacteria	Firmicutes	Clostridia	Lachnospirales	Lachnospiraceae	Bariatricus	Bariatricus comes
CN25.bin.89	clu_71	203	2830679	20267	6304	66881	42.67	12.73	94.04	4.39	72.09	Bacteria	Firmicutes	Clostridia	Lachnospirales	Lachnospiraceae	Bariatricus	Bariatricus comes
CN20.bin.1	clu_71	78	2813371	69590	18462	358550	42.31	36.41	87.13	4.09	66.68	Bacteria	Firmicutes	Clostridia	Lachnospirales	Lachnospiraceae	Bariatricus	Bariatricus comes
CN21.bin.76	clu_72	57	2460514	74945	29185	180394	41.83	35.97	95.53	2.23	84.38	Bacteria	Firmicutes	Clostridia	Lachnospirales	Lachnospiraceae	Dorea	Dorea longicatena
PE25.bin.6	clu_72	72	2328254	53505	14564	140727	42.15	28.25	94.58	0	94.58	Bacteria	Firmicutes	Clostridia	Lachnospirales	Lachnospiraceae	Dorea	Dorea longicatena
PE05.bin.47	clu_72	70	2508022	64659	21768	139383	41.61	47.08	87.13	0	87.13	Bacteria	Firmicutes	Clostridia	Lachnospirales	Lachnospiraceae	Dorea	Dorea longicatena
CN05.bin.13	clu_72	86	2109721	39309	12645	140058	41.76	30.64	83.72	2.05	73.47	Bacteria	Firmicutes	Clostridia	Lachnospirales	Lachnospiraceae	Dorea	Dorea longicatena
PE01.bin.72	clu_72	180	2215529	19112	5478	70906	41.96	42.61	91.11	2.83	76.96	Bacteria	Firmicutes	Clostridia	Lachnospirales	Lachnospiraceae	Dorea	Dorea longicatena
PE34.bin.23	clu_73	349	3128472	12616	4137	66426	41.36	16.69	91.3	2.19	80.35	Bacteria	Firmicutes	Clostridia	Lachnospirales	Lachnospiraceae	Dorea	Dorea longicatena
PE13.bin.30	clu_73	57	2031142	58708	18031	163228	41.91	148.81	82.89	0	82.89	Bacteria	Firmicutes	Clostridia	Lachnospirales	Lachnospiraceae	Dorea	Dorea longicatena
CN03.bin.43	clu_73	132	2656561	32730	9110	150702	42.11	21.13	97.95	3.9	78.45	Bacteria	Firmicutes	Clostridia	Lachnospirales	Lachnospiraceae	Dorea	Dorea longicatena
PE36.bin.63	clu_73	55	2022338	48232	22711	107714	42.28	47.8	83.67	4.97	58.82	Bacteria	Firmicutes	Clostridia	Lachnospirales	Lachnospiraceae	Dorea	Dorea longicatena
PE35.bin.5	clu_73	68	2300780	48871	18298	134923	42.17	29.2	94.58	1.97	84.73	Bacteria	Firmicutes	Clostridia	Lachnospirales	Lachnospiraceae	Dorea	Dorea longicatena
CN25.bin.40	clu_73	91	2639202	50424	18870	138249	42.14	46.02	94.29	3.51	76.74	Bacteria	Firmicutes	Clostridia	Lachnospirales	Lachnospiraceae	Dorea	Dorea longicatena
PE38.bin.46	clu_73	74	2361935	52162	17665	93112	42.15	74.99	86.42	1.17	80.57	Bacteria	Firmicutes	Clostridia	Lachnospirales	Lachnospiraceae	Dorea	Dorea longicatena
CN27.bin.27	clu_73	51	1862900	66854	19891	138090	41.99	14.24	70.24	0.58	67.34	Bacteria	Firmicutes	Clostridia	Lachnospirales	Lachnospiraceae	Dorea	Dorea longicatena
CN07.bin.40	clu_73	104	2193541	31572	10706	70863	42.36	40.62	87.86	0.8	83.86	Bacteria	Firmicutes	Clostridia	Lachnospirales	Lachnospiraceae	Dorea	Dorea longicatena
PE14.bin.43	clu_73	116	1775689	21440	7810	64387	42.89	31.44	74.23	3.51	56.68	Bacteria	Firmicutes	Clostridia	Lachnospirales	Lachnospiraceae	Dorea	Dorea longicatena
CN30.bin.17	clu_73	231	2560116	16396	5116	55771	42	18.26	90.04	3.93	70.39	Bacteria	Firmicutes	Clostridia	Lachnospirales	Lachnospiraceae	Dorea	Dorea longicatena
CN23.bin.7	clu_74	61	1859740	34212	18366	107504	44.36	20.37	76.32	0	76.32	Bacteria	Firmicutes	Clostridia	Lachnospirales	Lachnospiraceae	Ruminococcus	Ruminococcus gnavus
CN25.bin.24	clu_74	78	2168342	54275	13417	181903	43.93	32.11	90.16	1.17	84.31	Bacteria	Firmicutes	Clostridia	Lachnospirales	Lachnospiraceae	Ruminococcus	Ruminococcus gnavus
PE37.bin.37	clu_74	118	3404544	53762	12717	193248	42.7	219.91	99.3	1.17	93.45	Bacteria	Firmicutes	Clostridia	Lachnospirales	Lachnospiraceae	Ruminococcus	Ruminococcus gnavus
CN20.bin.18	clu_74	36	2478819	116265	45318	211600	43.6	22.98	91.23	1.17	85.38	Bacteria	Firmicutes	Clostridia	Lachnospirales	Lachnospiraceae	Ruminococcus	Ruminococcus gnavus
PE25.bin.20	clu_74	127	2660403	40913	8958	145837	43.53	88.79	92.69	0.03	92.54	Bacteria	Firmicutes	Clostridia	Lachnospirales	Lachnospiraceae	Ruminococcus	Ruminococcus gnavus
CN36.bin.40	clu_74	96	2559736	51538	12768	181557	43.58	15.18	92.22	1.36	85.42	Bacteria	Firmicutes	Clostridia	Lachnospirales	Lachnospiraceae	Ruminococcus	Ruminococcus gnavus
CN08.bin.10	clu_74	77	2241429	50031	15150	100196	43.57	55.65	77.4	0	77.4	Bacteria	Firmicutes	Clostridia	Lachnospirales	Lachnospiraceae	Ruminococcus	Ruminococcus gnavus
CN33.bin.46	clu_74	52	2698933	81467	23045	200462	43.31	158.07	86.55	0	86.55	Bacteria	Firmicutes	Clostridia	Lachnospirales	Lachnospiraceae	Ruminococcus	Ruminococcus gnavus
PE27.bin.40	clu_74	45	2603137	113111	39753	231492	43.36	538.19	91.81	2.51	79.26	Bacteria	Firmicutes	Clostridia	Lachnospirales	Lachnospiraceae	Ruminococcus	Ruminococcus gnavus
PE39.bin.7	clu_74	87	2669362	49864	15872	141215	43.38	144.02	89.61	2.14	78.91	Bacteria	Firmicutes	Clostridia	Lachnospirales	Lachnospiraceae	Ruminococcus	Ruminococcus gnavus
CN31.bin.21	clu_74	82	2170697	42582	13355	136347	43.75	14.83	84.8	0.58	81.9	Bacteria	Firmicutes	Clostridia	Lachnospirales	Lachnospiraceae	Ruminococcus	Ruminococcus gnavus
PE19.bin.26	clu_74	90	1759009	29119	10665	93883	44.13	42.34	73.83	0.12	73.23	Bacteria	Firmicutes	Clostridia	Lachnospirales	Lachnospiraceae	Ruminococcus	Ruminococcus gnavus
CN15.bin.33	clu_74	187	1958650	15040	5161	48562	43.95	52.76	86.65	0	86.65	Bacteria	Firmicutes	Clostridia	Lachnospirales	Lachnospiraceae	Ruminococcus	Ruminococcus gnavus
PE24.bin.25	clu_74	303	3251567	15986	4864	79377	42.87	103.65	90.84	3.51	73.29	Bacteria	Firmicutes	Clostridia	Lachnospirales	Lachnospiraceae	Ruminococcus	Ruminococcus gnavus
PE31.bin.23	clu_74	108	2332176	39326	11066	132835	43.7	125.57	97.37	0	97.37	Bacteria	Firmicutes	Clostridia	Lachnospirales	Lachnospiraceae	Ruminococcus	Ruminococcus gnavus
PE15.bin.24	clu_74	34	2543238	113328	47217	259117	43.25	175.53	94.15	0	94.15	Bacteria	Firmicutes	Clostridia	Lachnospirales	Lachnospiraceae	Ruminococcus	Ruminococcus gnavus
CN07.bin.21	clu_74	139	2258578	23064	7768	91502	43.67	44.27	83.61	1.1	78.11	Bacteria	Firmicutes	Clostridia	Lachnospirales	Lachnospiraceae	Ruminococcus	Ruminococcus gnavus
PE34.bin.12	clu_74	60	2250334	67886	18114	266877	42.82	124.1	83.04	4.68	59.64	Bacteria	Firmicutes	Clostridia	Lachnospirales	Lachnospiraceae	Ruminococcus	Ruminococcus gnavus
CN26.bin.86	clu_74	29	2314843	96234	50110	301618	43.77	18.44	90.06	0.58	87.16	Bacteria	Firmicutes	Clostridia	Lachnospirales	Lachnospiraceae	Ruminococcus	Ruminococcus gnavus
PE40.bin.26	clu_74	36	2418745	123373	39113	266009	43.58	46.24	90.06	0.29	88.61	Bacteria	Firmicutes	Clostridia	Lachnospirales	Lachnospiraceae	Ruminococcus	Ruminococcus gnavus
CN37.bin.1	clu_75	12	3297449	864115	146486	978130	44.23	132.67	99.33	4.03	79.18	Bacteria	Firmicutes	Clostridia	Lachnospirales	Lachnospiraceae	Anaerostipes	Anaerostipes caccae
CN34.bin.30	clu_76	46	2463336	89805	28664	606462	44.78	18.01	96.64	0	96.64	Bacteria	Firmicutes	Clostridia	Lachnospirales	Lachnospiraceae	Frisingicoccus	Unknown
PE05.bin.29	clu_76	124	2198902	26119	8862	106512	44.91	11.93	95.42	0.67	92.07	Bacteria	Firmicutes	Clostridia	Lachnospirales	Lachnospiraceae	Frisingicoccus	Unknown
PE14.bin.47	clu_77	156	2455639	22957	7747	142257	44.47	14.66	85.68	1.57	77.83	Bacteria	Firmicutes	Clostridia	Lachnospirales	Lachnospiraceae	Coprococcus	Coprococcus catus
PE28.bin.22	clu_78	32	2828118	137106	50476	259614	37.44	33.18	96.64	0	96.64	Bacteria	Firmicutes	Clostridia	Lachnospirales	Lachnospiraceae	Lachnospira	Lachnospira eligens
CN34.bin.4	clu_78	45	2853393	117531	34976	343145	37.49	58.37	97.99	0	97.99	Bacteria	Firmicutes	Clostridia	Lachnospirales	Lachnospiraceae	Lachnospira	Lachnospira eligens
PE35.bin.64	clu_78	42	2711335	94120	35524	262029	37.35	54.79	95.97	0.22	94.87	Bacteria	Firmicutes	Clostridia	Lachnospirales	Lachnospiraceae	Lachnospira	Lachnospira eligens
CN27.bin.82	clu_78	34	2647629	134741	50520	302511	37.29	59.67	96.64	0.34	94.94	Bacteria	Firmicutes	Clostridia	Lachnospirales	Lachnospiraceae	Lachnospira	Lachnospira eligens
CN14.bin.25	clu_78	36	2507214	102354	35539	362117	37.54	112	97.32	0	97.32	Bacteria	Firmicutes	Clostridia	Lachnospirales	Lachnospiraceae	Lachnospira	Lachnospira eligens
PE05.bin.61	clu_78	226	2419723	13148	5422	48423	37.45	11.37	93.35	0.34	91.65	Bacteria	Firmicutes	Clostridia	Lachnospirales	Lachnospiraceae	Lachnospira	Lachnospira eligens
CN11.bin.19	clu_78	287	2202787	10302	4005	33193	37.9	8.84	85.94	2.24	74.74	Bacteria	Firmicutes	Clostridia	Lachnospirales	Lachnospiraceae	Lachnospira	Lachnospira eligens
CN36.bin.89	clu_78	50	2432092	67742	29572	229802	37.55	15.64	97.82	0	97.82	Bacteria	Firmicutes	Clostridia	Lachnospirales	Lachnospiraceae	Lachnospira	Unknown
PE04.bin.35	clu_79	251	2305376	12627	4422	62867	36.08	10.16	91.32	0.24	90.12	Bacteria	Firmicutes	Clostridia	Lachnospirales	Lachnospiraceae	Lachnospira	Lachnospira rogosae
PE05.bin.32	clu_79	22	2578859	192068	58257	378126	35.87	35.74	97.36	0	97.36	Bacteria	Firmicutes	Clostridia	Lachnospirales	Lachnospiraceae	Lachnospira	Lachnospira rogosae
CN36.bin.38	clu_80	32	2534644	136645	34436	268493	37.18	41.87	93.04	0	93.04	Bacteria	Firmicutes	Clostridia	Lachnospirales	Lachnospiraceae	Lachnospira	Unknown
PE32.bin.24	clu_81	34	2631492	142642	46045	282615	44.91	99.95	76.9	0	76.9	Bacteria	Firmicutes	Clostridia	Lachnospirales	Lachnospiraceae	Blautia	Unknown
CN28.bin.8	clu_81	60	2634346	71835	23626	186218	44.95	23.26	87.18	1.27	80.83	Bacteria	Firmicutes	Clostridia	Lachnospirales	Lachnospiraceae	Blautia	Unknown
CN20.bin.13	clu_82	44	2855697	111767	27376	308003	44.94	63.97	97.47	0.32	95.87	Bacteria	Firmicutes	Clostridia	Lachnospirales	Lachnospiraceae	Blautia	Blautia massiliensis
PE26.bin.15	clu_82	33	2098557	96335	45777	235656	45.2	28.82	79.77	0.32	78.17	Bacteria	Firmicutes	Clostridia	Lachnospirales	Lachnospiraceae	Blautia	Blautia massiliensis
PE21.bin.28	clu_82	137	2171173	23187	7997	55244	45.42	18.39	76.48	1.6	68.48	Bacteria	Firmicutes	Clostridia	Lachnospirales	Lachnospiraceae	Blautia	Blautia massiliensis
CN02.bin.15	clu_82	44	3069951	110386	45235	264837	44.59	44.37	93.67	0.95	88.92	Bacteria	Firmicutes	Clostridia	Lachnospirales	Lachnospiraceae	Blautia	Blautia massiliensis
PE35.bin.10	clu_82	48	2603285	83318	32549	217861	45.01	43.04	89.24	0.34	87.54	Bacteria	Firmicutes	Clostridia	Lachnospirales	Lachnospiraceae	Blautia	Blautia massiliensis
CN25.bin.10	clu_82	32	2361688	123639	44314	176583	45.18	32.03	84.18	0.34	82.48	Bacteria	Firmicutes	Clostridia	Lachnospirales	Lachnospiraceae	Blautia	Blautia massiliensis
PE05.bin.3	clu_82	48	2986212	122683	29025	225264	44.83	39.36	99.23	2.22	88.13	Bacteria	Firmicutes	Clostridia	Lachnospirales	Lachnospiraceae	Blautia	Blautia massiliensis
CN21.bin.22	clu_82	38	2438382	118708	38982	170019	44.62	38.51	82.91	1.7	74.41	Bacteria	Firmicutes	Clostridia	Lachnospirales	Lachnospiraceae	Blautia	Blautia massiliensis
CN15.bin.4	clu_82	32	2877701	136733	43969	321800	44.72	34.25	96.2	0.95	91.45	Bacteria	Firmicutes	Clostridia	Lachnospirales	Lachnospiraceae	Blautia	Blautia massiliensis
PE22.bin.14	clu_82	140	2384287	23727	8117	111210	45.45	25.81	81.43	0.32	79.83	Bacteria	Firmicutes	Clostridia	Lachnospirales	Lachnospiraceae	Blautia	Blautia massiliensis
CN36.bin.74	clu_82	193	2570739	21362	6031	67179	45.06	20.6	70.09	3.59	52.14	Bacteria	Firmicutes	Clostridia	Lachnospirales	Lachnospiraceae	Blautia	Blautia massiliensis
PE28.bin.14	clu_82	30	2182707	99901	48928	264553	44.78	49.42	81.01	0.34	79.31	Bacteria	Firmicutes	Clostridia	Lachnospirales	Lachnospiraceae	Blautia	Blautia massiliensis
CN35.bin.61	clu_82	225	1941318	11178	4150	45948	45.61	22.31	72.99	3.16	57.19	Bacteria	Firmicutes	Clostridia	Lachnospirales	Lachnospiraceae	Blautia	Blautia massiliensis
PE13.bin.2	clu_82	39	2738291	119964	31141	207774	44.94	195.09	91.14	1.57	83.29	Bacteria	Firmicutes	Clostridia	Lachnospirales	Lachnospiraceae	Blautia	Blautia massiliensis
PE38.bin.58	clu_82	91	1867276	36250	11018	96569	45.12	72.82	70.2	0.95	65.45	Bacteria	Firmicutes	Clostridia	Lachnospirales	Lachnospiraceae	Blautia	Blautia massiliensis
PE16.bin.20	clu_82	114	2360432	30870	10883	159699	45.65	44.43	71.33	0.95	66.58	Bacteria	Firmicutes	Clostridia	Lachnospirales	Lachnospiraceae	Blautia	Blautia massiliensis
PE27.bin.24	clu_83	113	3219251	54025	14771	175515	43.31	31.85	89.38	0.63	86.23	Bacteria	Firmicutes	Clostridia	Lachnospirales	Lachnospiraceae	Blautia	Unknown
PE36.bin.43	clu_83	95	3197554	64157	17503	183884	43.25	84.34	86.71	0.02	86.61	Bacteria	Firmicutes	Clostridia	Lachnospirales	Lachnospiraceae	Blautia	Unknown
CN34.bin.109	clu_83	163	3054178	29810	8078	141758	43.6	30.84	92.41	3.59	74.46	Bacteria	Firmicutes	Clostridia	Lachnospirales	Lachnospiraceae	Blautia	Unknown
PE13.bin.18	clu_83	227	3490892	23621	7092	82777	43.12	59.17	88.19	1.74	79.49	Bacteria	Firmicutes	Clostridia	Lachnospirales	Lachnospiraceae	Blautia	Unknown
CN14.bin.8	clu_83	122	3463392	53861	14076	164634	43.03	26.41	92.25	3.16	76.45	Bacteria	Firmicutes	Clostridia	Lachnospirales	Lachnospiraceae	Blautia	Unknown
PE18.bin.7	clu_83	138	3102520	36962	10048	108469	43.31	19.89	91.23	4.63	68.08	Bacteria	Firmicutes	Clostridia	Lachnospirales	Lachnospiraceae	Blautia	Unknown
CN08.bin.46	clu_83	253	2614014	14965	4526	51976	44.07	14.64	80.34	4.11	59.79	Bacteria	Firmicutes	Clostridia	Lachnospirales	Lachnospiraceae	Blautia	Unknown
CN27.bin.44	clu_83	209	2754541	19887	5952	62292	43.82	10.77	82.8	1.9	73.3	Bacteria	Firmicutes	Clostridia	Lachnospirales	Lachnospiraceae	Blautia	Unknown
PE25.bin.12	clu_83	426	2410841	6738	2956	28023	43.98	8.62	77.15	0.11	76.6	Bacteria	Firmicutes	Clostridia	Lachnospirales	Lachnospiraceae	Blautia	Unknown
CN25.bin.27	clu_83	233	3405456	21119	7143	72918	43.29	16.22	88.88	2.22	77.78	Bacteria	Firmicutes	Clostridia	Lachnospirales	Lachnospiraceae	Blautia	Unknown
CN35.bin.45	clu_83	428	2793848	7338	3528	81459	43.56	8.59	78.55	2.22	67.45	Bacteria	Firmicutes	Clostridia	Lachnospirales	Lachnospiraceae	Blautia	Unknown
PE22.bin.21	clu_83	468	2160855	5012	2606	18200	44.42	10.83	74.28	0.63	71.13	Bacteria	Firmicutes	Clostridia	Lachnospirales	Lachnospiraceae	Blautia	Unknown
PE16.bin.21	clu_84	280	2304953	11692	3764	40721	44.55	25.46	86.95	1.12	81.35	Bacteria	Firmicutes	Clostridia	Lachnospirales	Lachnospiraceae	Blautia	Unknown
PE37.bin.16	clu_84	62	2796233	77415	22072	171961	44.11	16.84	94.94	0.63	91.79	Bacteria	Firmicutes	Clostridia	Lachnospirales	Lachnospiraceae	Blautia	Unknown
CN26.bin.28	clu_84	25	3006471	230753	63529	369203	43.73	23.24	98.73	0	98.73	Bacteria	Firmicutes	Clostridia	Lachnospirales	Lachnospiraceae	Blautia	Unknown
CN08.bin.48	clu_84	76	2337505	47783	15055	112266	44.34	21.19	83.54	1.27	77.19	Bacteria	Firmicutes	Clostridia	Lachnospirales	Lachnospiraceae	Blautia	Unknown
CN12.bin.11	clu_84	83	2886485	54023	18892	129161	43.85	22	94.58	3.8	75.58	Bacteria	Firmicutes	Clostridia	Lachnospirales	Lachnospiraceae	Blautia	Unknown
PE02.bin.33	clu_84	414	2794809	9217	3142	42353	43.8	9.73	85.58	0.44	83.38	Bacteria	Firmicutes	Clostridia	Lachnospirales	Lachnospiraceae	Blautia	Unknown
PE34.bin.33	clu_85	31	2259659	106372	49050	284698	43	42.9	89.24	1.27	82.89	Bacteria	Firmicutes	Clostridia	Lachnospirales	Lachnospiraceae	Blautia	Unknown
PE24.bin.12	clu_86	117	3844660	58384	15359	198528	41.07	323.12	96.84	0.95	92.09	Bacteria	Firmicutes	Clostridia	Lachnospirales	Lachnospiraceae	Blautia	Unknown
CN26.bin.44	clu_86	116	3687635	69304	14786	161239	41.1	39.06	93.67	0	93.67	Bacteria	Firmicutes	Clostridia	Lachnospirales	Lachnospiraceae	Blautia	Unknown
PE03.bin.21	clu_86	190	3217441	28506	7919	72831	41.15	299.99	85.37	1.27	79.02	Bacteria	Firmicutes	Clostridia	Lachnospirales	Lachnospiraceae	Blautia	Unknown
CN04.bin.20	clu_87	72	2564945	48194	22098	147531	41.76	203.05	82.91	0	82.91	Bacteria	Firmicutes	Clostridia	Lachnospirales	Lachnospiraceae	Blautia	Blautia wexlerae
CN03.bin.63	clu_87	228	3050551	19293	5895	81922	41.7	167.19	83.33	3.16	67.53	Bacteria	Firmicutes	Clostridia	Lachnospirales	Lachnospiraceae	Blautia	Blautia wexlerae
PE28.bin.3	clu_87	204	2751992	19652	6209	105213	41.93	16.04	88.5	0.63	85.35	Bacteria	Firmicutes	Clostridia	Lachnospirales	Lachnospiraceae	Blautia	Blautia wexlerae
PE05.bin.26	clu_87	233	2276718	13193	4859	62183	42.09	166.47	76.42	1.31	69.87	Bacteria	Firmicutes	Clostridia	Lachnospirales	Lachnospiraceae	Blautia	Unknown
PE21.bin.26	clu_87	138	3309435	36510	12702	121793	41.5	157.93	92.3	2.53	79.65	Bacteria	Firmicutes	Clostridia	Lachnospirales	Lachnospiraceae	Blautia	Blautia wexlerae
PE37.bin.7	clu_87	199	3868493	29070	9440	115850	41.18	696.99	96.84	0.17	95.99	Bacteria	Firmicutes	Clostridia	Lachnospirales	Lachnospiraceae	Blautia	Blautia wexlerae
PE09.bin.81	clu_87	303	2503825	12779	3714	71037	42.27	113.01	77.45	3.16	61.65	Bacteria	Firmicutes	Clostridia	Lachnospirales	Lachnospiraceae	Blautia	Unknown
CN02.bin.23	clu_87	98	2731600	45203	14971	114402	41.6	455.36	75.32	0	75.32	Bacteria	Firmicutes	Clostridia	Lachnospirales	Lachnospiraceae	Blautia	Unknown
PE04.bin.30	clu_87	377	2655026	9454	3417	54248	41.49	52.02	76.26	4.43	54.11	Bacteria	Firmicutes	Clostridia	Lachnospirales	Lachnospiraceae	Blautia	Unknown
CN17.bin.105	clu_87	203	2221332	14636	5379	62285	42.26	88.24	77.37	0.95	72.62	Bacteria	Firmicutes	Clostridia	Lachnospirales	Lachnospiraceae	Blautia	Unknown
CN34.bin.20	clu_87	193	2399397	18029	5808	53843	41.75	165.55	84.76	0.4	82.76	Bacteria	Firmicutes	Clostridia	Lachnospirales	Lachnospiraceae	Blautia	Unknown
PE26.bin.63	clu_87	348	2238411	7539	3289	45420	41.86	100.47	73.64	0.21	72.59	Bacteria	Firmicutes	Clostridia	Lachnospirales	Lachnospiraceae	Blautia	Unknown
PE20.bin.11	clu_87	92	3196058	49827	18498	117546	41.73	63.53	92.41	0	92.41	Bacteria	Firmicutes	Clostridia	Lachnospirales	Lachnospiraceae	Blautia	Unknown
CN21.bin.20	clu_87	279	2142237	10349	3633	63633	42.41	65.53	73.09	1.05	67.84	Bacteria	Firmicutes	Clostridia	Lachnospirales	Lachnospiraceae	Blautia	Unknown
CN27.bin.8	clu_87	298	3133333	14944	4537	72336	41.78	73.22	83.98	4.43	61.83	Bacteria	Firmicutes	Clostridia	Lachnospirales	Lachnospiraceae	Blautia	Unknown
CN23.bin.23	clu_88	87	2879922	55403	15771	144452	45.21	31.29	98.1	0	98.1	Bacteria	Firmicutes	Clostridia	Lachnospirales	Lachnospiraceae	Blautia	Unknown
PE09.bin.56	clu_88	67	2431033	71901	20424	197296	45.27	83.12	80.54	0.95	75.79	Bacteria	Firmicutes	Clostridia	Lachnospirales	Lachnospiraceae	Blautia	Unknown
CN21.bin.58	clu_88	85	2812871	59602	16136	140645	45.07	22.45	84.93	3.11	69.38	Bacteria	Firmicutes	Clostridia	Lachnospirales	Lachnospiraceae	Blautia	Unknown
PE14.bin.46	clu_88	88	2438880	45999	14994	138700	45.61	22.19	91.83	0.32	90.23	Bacteria	Firmicutes	Clostridia	Lachnospirales	Lachnospiraceae	Blautia	Unknown
PE40.bin.50	clu_88	111	2765095	44784	11625	164065	44.73	15.31	85.69	0.53	83.04	Bacteria	Firmicutes	Clostridia	Lachnospirales	Lachnospiraceae	Blautia	Unknown
PE19.bin.55	clu_88	44	2123752	90222	25708	184633	45.27	118.58	83.77	1.29	77.32	Bacteria	Firmicutes	Clostridia	Lachnospirales	Lachnospiraceae	Blautia	Unknown
PE35.bin.88	clu_88	58	1814699	51502	16370	136121	45.89	26.13	72.96	1.64	64.76	Bacteria	Firmicutes	Clostridia	Lachnospirales	Lachnospiraceae	Blautia	Unknown
CN12.bin.45	clu_89	68	3270708	101853	25663	308757	41.74	47.65	97.8	1.32	91.2	Bacteria	Firmicutes	Clostridia	Lachnospirales	Lachnospiraceae	Blautia	Blautia obeum
CN20.bin.69	clu_89	218	2479137	19001	4607	74756	42.23	13.5	90.64	0.97	85.79	Bacteria	Firmicutes	Clostridia	Lachnospirales	Lachnospiraceae	Blautia	Blautia obeum
PE13.bin.9	clu_90	434	2852938	7719	3303	44131	42.62	11.93	87.05	1.9	77.55	Bacteria	Firmicutes	Clostridia	Lachnospirales	Lachnospiraceae	Blautia	Unknown
PE05.bin.21	clu_91	597	5743383	13643	4450	138625	48.52	9.95	89.8	4.89	65.35	Bacteria	Firmicutes	Clostridia	Lachnospirales	Lachnospiraceae	Eisenbergiella	Eisenbergiella massiliensis
PE10.bin.22	clu_91	532	5443136	15337	4484	68779	49.43	12.37	88.92	1.26	82.62	Bacteria	Firmicutes	Clostridia	Lachnospirales	Lachnospiraceae	Eisenbergiella	Eisenbergiella massiliensis
CN19.bin.22	clu_92	247	2400990	13840	4521	47368	49.34	13.67	88.16	0.84	83.96	Bacteria	Firmicutes	Clostridia	Lachnospirales	Lachnospiraceae	Eisenbergiella	Unknown
PE37.bin.19	clu_93	64	2522247	64860	23426	153018	43.69	19.97	87.97	1.58	80.07	Bacteria	Firmicutes	Clostridia	Lachnospirales	Lachnospiraceae	Ruminococcus	Unknown
PE27.bin.38	clu_93	272	2228289	11355	3880	60182	44.3	10.36	89	3.29	72.55	Bacteria	Firmicutes	Clostridia	Lachnospirales	Lachnospiraceae	Ruminococcus	Unknown
CN04.bin.46	clu_94	52	2778740	127491	30971	298189	45.75	40.89	92.41	0.63	89.26	Bacteria	Firmicutes	Clostridia	Lachnospirales	Lachnospiraceae	Ruminococcus	Unknown
PE21.bin.48	clu_94	64	2778448	80224	23903	187730	46.07	20.45	96.62	0.63	93.47	Bacteria	Firmicutes	Clostridia	Lachnospirales	Lachnospiraceae	Ruminococcus	Unknown
CN35.bin.36	clu_94	55	2678167	67624	26818	212670	46.06	27.95	94.94	0.63	91.79	Bacteria	Firmicutes	Clostridia	Lachnospirales	Lachnospiraceae	Ruminococcus	Unknown
PE36.bin.66	clu_94	147	2397591	26206	7644	128215	46.54	14.45	88.11	2.43	75.96	Bacteria	Firmicutes	Clostridia	Lachnospirales	Lachnospiraceae	Ruminococcus	Unknown
PE01.bin.50	clu_95	74	2796744	64213	23553	125995	44.86	32.72	90.51	1.69	82.06	Bacteria	Firmicutes	Clostridia	Lachnospirales	Lachnospiraceae	Ruminococcus	Unknown
CN07.bin.36	clu_95	99	2360660	36004	11587	84870	45	38.65	78.61	1.27	72.26	Bacteria	Firmicutes	Clostridia	Lachnospirales	Lachnospiraceae	Ruminococcus	Unknown
CN04.bin.3	clu_96	60	2921149	114154	24448	295421	43.45	37.37	96.14	3.14	80.44	Bacteria	Firmicutes	Clostridia	Lachnospirales	Lachnospiraceae	Agathobacter	Agathobacter faecis
CN20.bin.64	clu_96	53	2844756	125650	21167	407087	43.48	85.62	98.73	1.28	92.33	Bacteria	Firmicutes	Clostridia	Lachnospirales	Lachnospiraceae	Agathobacter	Agathobacter faecis
CN15.bin.8	clu_96	59	2903080	113997	21470	337744	43.4	25.79	93.96	1.33	87.31	Bacteria	Firmicutes	Clostridia	Lachnospirales	Lachnospiraceae	Agathobacter	Agathobacter faecis
CN27.bin.28	clu_96	41	2656787	151355	53905	308457	43.79	27.86	95.33	2.12	84.73	Bacteria	Firmicutes	Clostridia	Lachnospirales	Lachnospiraceae	Agathobacter	Agathobacter faecis
CN21.bin.34	clu_96	43	2686645	99160	34246	393334	43.91	24.82	96.38	2.16	85.58	Bacteria	Firmicutes	Clostridia	Lachnospirales	Lachnospiraceae	Agathobacter	Agathobacter faecis
PE35.bin.76	clu_96	74	2949074	60187	21872	271229	43.59	24.51	95.79	3.23	79.64	Bacteria	Firmicutes	Clostridia	Lachnospirales	Lachnospiraceae	Agathobacter	Agathobacter faecis
CN14.bin.73	clu_96	23	2095291	118725	62886	194247	44.12	54	79.47	1.21	73.42	Bacteria	Firmicutes	Clostridia	Lachnospirales	Lachnospiraceae	Agathobacter	Agathobacter faecis
CN26.bin.61	clu_96	14	1821389	263277	97280	484734	43.73	82.26	78.26	1.52	70.66	Bacteria	Firmicutes	Clostridia	Lachnospirales	Lachnospiraceae	Agathobacter	Agathobacter faecis
CN31.bin.43	clu_96	84	2424602	47904	15006	200203	44.45	12.62	86.55	4.61	63.5	Bacteria	Firmicutes	Clostridia	Lachnospirales	Lachnospiraceae	Agathobacter	Agathobacter faecis
PE05.bin.12	clu_96	35	2704597	126835	40170	314646	43.72	21.76	93.96	1.28	87.56	Bacteria	Firmicutes	Clostridia	Lachnospirales	Lachnospiraceae	Agathobacter	Agathobacter faecis
PE01.bin.8	clu_97	68	2589474	52670	21432	149109	41.86	18.25	96.86	0.3	95.36	Bacteria	Firmicutes	Clostridia	Lachnospirales	Lachnospiraceae	Agathobacter	Agathobacter rectalis
PE38.bin.20	clu_97	63	2730296	60109	21433	266676	41.59	132.46	97.58	0.97	92.73	Bacteria	Firmicutes	Clostridia	Lachnospirales	Lachnospiraceae	Agathobacter	Agathobacter rectalis
CN08.bin.26	clu_97	94	2534173	34566	14143	121603	41.83	18.7	96.04	0.03	95.89	Bacteria	Firmicutes	Clostridia	Lachnospirales	Lachnospiraceae	Agathobacter	Agathobacter rectalis
PE35.bin.92	clu_97	45	2763124	111042	32194	264995	41.6	129.65	97.42	2.42	85.32	Bacteria	Firmicutes	Clostridia	Lachnospirales	Lachnospiraceae	Agathobacter	Agathobacter rectalis
PE17.bin.9	clu_97	134	2310409	25662	9644	85336	42.1	31.22	92.79	2.09	82.34	Bacteria	Firmicutes	Clostridia	Lachnospirales	Lachnospiraceae	Agathobacter	Agathobacter rectalis
CN20.bin.38	clu_97	48	2420888	87967	27896	341709	41.67	95.36	91.55	0	91.55	Bacteria	Firmicutes	Clostridia	Lachnospirales	Lachnospiraceae	Agathobacter	Agathobacter rectalis
CN06.bin.19	clu_97	84	2626896	50083	16555	181926	41.72	29.12	97.4	0.89	92.95	Bacteria	Firmicutes	Clostridia	Lachnospirales	Lachnospiraceae	Agathobacter	Agathobacter rectalis
PE23.bin.31	clu_97	199	2468388	18814	5580	68223	42.06	13.81	93.15	2.51	80.6	Bacteria	Firmicutes	Clostridia	Lachnospirales	Lachnospiraceae	Agathobacter	Agathobacter rectalis
CN31.bin.33	clu_97	239	2292846	12892	4432	50981	42.18	9.32	88.54	0.72	84.94	Bacteria	Firmicutes	Clostridia	Lachnospirales	Lachnospiraceae	Agathobacter	Agathobacter rectalis
CN29.bin.36	clu_97	103	2434695	32931	12920	121091	42.05	14.7	91.41	0.6	88.41	Bacteria	Firmicutes	Clostridia	Lachnospirales	Lachnospiraceae	Agathobacter	Agathobacter rectalis
PE08.bin.55	clu_97	44	2699359	96946	27651	255853	41.92	81.55	99.52	0	99.52	Bacteria	Firmicutes	Clostridia	Lachnospirales	Lachnospiraceae	Agathobacter	Agathobacter rectalis
CN34.bin.34	clu_97	45	2511923	92998	30017	342227	41.91	20.58	97.1	0	97.1	Bacteria	Firmicutes	Clostridia	Lachnospirales	Lachnospiraceae	Agathobacter	Agathobacter rectalis
CN09.bin.15	clu_97	42	2671857	83697	31837	262983	41.59	22.83	97.58	0	97.58	Bacteria	Firmicutes	Clostridia	Lachnospirales	Lachnospiraceae	Agathobacter	Agathobacter rectalis
PE29.bin.36	clu_97	46	2527633	75152	29908	197876	41.82	40.21	96.14	0	96.14	Bacteria	Firmicutes	Clostridia	Lachnospirales	Lachnospiraceae	Agathobacter	Agathobacter rectalis
PE36.bin.81	clu_97	38	2147398	106811	29345	337705	41.31	66.98	82.85	0	82.85	Bacteria	Firmicutes	Clostridia	Lachnospirales	Lachnospiraceae	Agathobacter	Agathobacter rectalis
CN35.bin.32	clu_97	94	2287923	35899	10976	120561	41.97	11.92	96.74	0	96.74	Bacteria	Firmicutes	Clostridia	Lachnospirales	Lachnospiraceae	Agathobacter	Agathobacter rectalis
CN27.bin.35	clu_97	165	2439295	20985	7661	80637	42.06	11.03	96.58	1.84	87.38	Bacteria	Firmicutes	Clostridia	Lachnospirales	Lachnospiraceae	Agathobacter	Agathobacter rectalis
PE04.bin.15	clu_97	41	2590379	103904	34899	399337	41.72	75.92	94.77	0	94.77	Bacteria	Firmicutes	Clostridia	Lachnospirales	Lachnospiraceae	Agathobacter	Agathobacter rectalis
PE06.bin.47	clu_97	67	2512254	55712	18986	157711	41.89	37.9	95.05	0.48	92.65	Bacteria	Firmicutes	Clostridia	Lachnospirales	Lachnospiraceae	Agathobacter	Agathobacter rectalis
PE30.bin.13	clu_97	146	2846159	34005	8977	104001	41.32	22.69	94.08	0.46	91.78	Bacteria	Firmicutes	Clostridia	Lachnospirales	Lachnospiraceae	Agathobacter	Agathobacter rectalis
CN22.bin.37	clu_97	84	2749933	48910	15623	161765	41.92	208.64	88.95	3.74	70.25	Bacteria	Firmicutes	Clostridia	Lachnospirales	Lachnospiraceae	Agathobacter	Agathobacter rectalis
CN17.bin.10	clu_97	55	2503643	65731	23688	151084	41.7	18.21	97.58	0.48	95.18	Bacteria	Firmicutes	Clostridia	Lachnospirales	Lachnospiraceae	Agathobacter	Agathobacter rectalis
PE11.bin.21	clu_97	71	2606085	102233	15434	438059	40.3	36.34	80.19	0.81	76.14	Bacteria	Firmicutes	Clostridia	Lachnospirales	Lachnospiraceae	Agathobacter	Agathobacter rectalis
PE22.bin.12	clu_97	60	2745075	58924	24441	158498	41.57	552.41	98.07	3.38	81.17	Bacteria	Firmicutes	Clostridia	Lachnospirales	Lachnospiraceae	Agathobacter	Agathobacter rectalis
CN19.bin.30	clu_97	223	2238692	12806	5015	51333	42.48	14.6	95.96	1.17	90.11	Bacteria	Firmicutes	Clostridia	Lachnospirales	Lachnospiraceae	Agathobacter	Agathobacter rectalis
CN05.bin.22	clu_97	59	2837023	68795	31944	289035	41.74	170.3	89	1.06	83.7	Bacteria	Firmicutes	Clostridia	Lachnospirales	Lachnospiraceae	Agathobacter	Agathobacter rectalis
CN10.bin.45	clu_97	97	1982668	27602	12312	70273	42.31	49.17	83.89	2.56	71.09	Bacteria	Firmicutes	Clostridia	Lachnospirales	Lachnospiraceae	Agathobacter	Agathobacter rectalis
PE33.bin.17	clu_97	56	2856234	84892	26480	221626	41.65	49.01	97.34	1.85	88.09	Bacteria	Firmicutes	Clostridia	Lachnospirales	Lachnospiraceae	Agathobacter	Agathobacter rectalis
PE07.bin.13	clu_97	88	2302717	37876	13775	103359	42.22	35.13	91.74	0.89	87.29	Bacteria	Firmicutes	Clostridia	Lachnospirales	Lachnospiraceae	Agathobacter	Agathobacter rectalis
PE05.bin.52	clu_97	42	2563601	98003	32441	246118	41.87	109.74	96.86	0	96.86	Bacteria	Firmicutes	Clostridia	Lachnospirales	Lachnospiraceae	Agathobacter	Agathobacter rectalis
PE14.bin.26	clu_97	51	2659910	76276	30788	271803	41.69	149.72	82.45	4.83	58.3	Bacteria	Firmicutes	Clostridia	Lachnospirales	Lachnospiraceae	Agathobacter	Agathobacter rectalis
PE09.bin.73	clu_97	64	2301833	53761	19698	143898	42.49	22.52	95.21	0	95.21	Bacteria	Firmicutes	Clostridia	Lachnospirales	Lachnospiraceae	Agathobacter	Agathobacter rectalis
PE19.bin.59	clu_97	241	1572492	8120	3280	39641	42.59	10.36	72.24	0.65	68.99	Bacteria	Firmicutes	Clostridia	Lachnospirales	Lachnospiraceae	Agathobacter	Agathobacter rectalis
CN11.bin.99	clu_98	62	2710900	72822	31694	236601	40.98	20.66	97.64	4.41	75.59	Bacteria	Firmicutes	Clostridia	Lachnospirales	Lachnospiraceae	CAG-45	Unknown
PE10.bin.36	clu_99	275	5508586	35570	9310	141414	46.38	17.04	88.55	0.85	84.3	Bacteria	Firmicutes	Clostridia	Lachnospirales	Lachnospiraceae	Blautia	Blautia coccoides
CN01.bin.25	clu_99	441	5514398	19141	5384	125314	46.18	10.94	95.57	0.85	91.32	Bacteria	Firmicutes	Clostridia	Lachnospirales	Lachnospiraceae	Blautia	Blautia coccoides
PE31.bin.39	clu_100	55	4836980	179434	43355	388411	47.11	30.95	89.81	0	89.81	Bacteria	Firmicutes	Clostridia	Lachnospirales	Lachnospiraceae	Blautia	Unknown
CN26.bin.1	clu_100	573	6245719	18172	4456	117710	46.56	10.97	90.22	3.82	71.12	Bacteria	Firmicutes	Clostridia	Lachnospirales	Lachnospiraceae	Blautia	Unknown
PE27.bin.32	clu_101	308	3133109	16532	4302	76181	41.13	11.6	92.25	1.4	85.25	Bacteria	Firmicutes	Clostridia	Lachnospirales	Lachnospiraceae	Blautia	Unknown
PE31.bin.68	clu_101	497	2954924	7381	2908	40506	40.99	8.22	80.15	1.59	72.2	Bacteria	Firmicutes	Clostridia	Lachnospirales	Lachnospiraceae	Blautia	Unknown
PE11.bin.29	clu_102	42	2445967	85715	36332	238943	44.27	36.09	84.08	0	84.08	Bacteria	Firmicutes	Clostridia	Lachnospirales	Lachnospiraceae	Blautia	Unknown
PE05.bin.14	clu_102	236	2694972	16525	5165	56674	44.3	10.93	89.81	1.93	80.16	Bacteria	Firmicutes	Clostridia	Lachnospirales	Lachnospiraceae	Blautia	Unknown
CN14.bin.38	clu_102	308	2610888	11282	4014	94450	43.99	9.64	87.03	2.23	75.88	Bacteria	Firmicutes	Clostridia	Lachnospirales	Lachnospiraceae	Blautia	Unknown
PE16.bin.25	clu_102	223	2389180	15765	4807	64665	44.93	30.52	89.22	0.64	86.02	Bacteria	Firmicutes	Clostridia	Lachnospirales	Lachnospiraceae	Blautia	Unknown
CN15.bin.18	clu_102	58	2948012	84340	27666	181394	43.93	27.58	97.71	2.07	87.36	Bacteria	Firmicutes	Clostridia	Lachnospirales	Lachnospiraceae	Blautia	Unknown
CN04.bin.19	clu_102	42	2751293	96996	34076	305200	44.15	24.78	96.44	0	96.44	Bacteria	Firmicutes	Clostridia	Lachnospirales	Lachnospiraceae	Blautia	Unknown
CN08.bin.42	clu_102	387	2339863	7970	2829	36442	44.79	10.25	77.01	3.5	59.51	Bacteria	Firmicutes	Clostridia	Lachnospirales	Lachnospiraceae	Blautia	Unknown
PE27.bin.66	clu_102	44	2321172	87127	28681	180591	44.31	48.32	83.77	0.48	81.37	Bacteria	Firmicutes	Clostridia	Lachnospirales	Lachnospiraceae	Blautia	Unknown
PE24.bin.9	clu_102	96	2518913	47370	13110	131058	44.34	30.66	83.76	0.42	81.66	Bacteria	Firmicutes	Clostridia	Lachnospirales	Lachnospiraceae	Blautia	Unknown
CN16.bin.21	clu_103	366	1798020	5836	2562	23121	39.07	8.16	71.16	1.27	64.81	Bacteria	Firmicutes	Clostridia	Lachnospirales	Lachnospiraceae	Blautia	Blautia hansenii
PE27.bin.35	clu_103	39	2469841	129200	47606	444026	38.57	68.01	85.91	0.31	84.36	Bacteria	Firmicutes	Clostridia	Lachnospirales	Lachnospiraceae	Blautia	Blautia hansenii
PE32.bin.63	clu_103	39	2377610	85721	37124	190265	38.94	53.16	92.99	0	92.99	Bacteria	Firmicutes	Clostridia	Lachnospirales	Lachnospiraceae	Blautia	Blautia hansenii
CN15.bin.17	clu_103	481	2922292	7159	3058	31400	38.36	9.11	88.06	2.62	74.96	Bacteria	Firmicutes	Clostridia	Lachnospirales	Lachnospiraceae	Blautia	Blautia hansenii
CN02.bin.27	clu_104	394	2693724	8488	3343	42036	47.83	9.04	88.89	3.43	71.74	Bacteria	Firmicutes	Clostridia	Peptostreptococcales	Anaerovoracaceae	Unknown	Unknown
CN31.bin.19	clu_105	53	6632363	208445	70385	472216	49.49	63.8	99.35	1.58	91.45	Bacteria	Firmicutes	Clostridia	Lachnospirales	Lachnospiraceae	Hungatella	Hungatella effluvii
CN26.bin.26	clu_106	34	3040656	103222	52217	417729	48.96	26.59	97.47	0	97.47	Bacteria	Firmicutes	Clostridia	Lachnospirales	Lachnospiraceae	CAG-81	Unknown
PE28.bin.54	clu_107	238	2347603	13219	4778	45130	53.78	11.44	86.05	1.27	79.7	Bacteria	Firmicutes	Clostridia	Lachnospirales	Lachnospiraceae	CAG-81	Unknown
PE40.bin.44	clu_108	18	2100123	193013	66512	582716	49.44	22.77	81.65	0	81.65	Bacteria	Firmicutes	Clostridia	Lachnospirales	Lachnospiraceae	Clostridium	Unknown
CN31.bin.51	clu_109	238	5652620	45366	10354	140264	49.89	13.87	91.89	0	91.89	Bacteria	Firmicutes	Clostridia	Lachnospirales	Lachnospiraceae	Enterocloster	Enterocloster bolteae
CN26.bin.80	clu_109	578	5483779	14622	3857	87691	50.15	15.72	87.07	2.83	72.92	Bacteria	Firmicutes	Clostridia	Lachnospirales	Lachnospiraceae	Enterocloster	Enterocloster bolteae
CN37.bin.64	clu_109	98	5327249	96617	23783	414397	49.86	14.94	93.7	0	93.7	Bacteria	Firmicutes	Clostridia	Lachnospirales	Lachnospiraceae	Enterocloster	Enterocloster bolteae
PE28.bin.64	clu_109	703	4570002	7583	3320	52954	50.43	9.3	73.45	0.56	70.65	Bacteria	Firmicutes	Clostridia	Lachnospirales	Lachnospiraceae	Enterocloster	Enterocloster bolteae
PE31.bin.36	clu_110	149	3718831	38873	12359	93424	50.34	13.22	94.8	1.55	87.05	Bacteria	Firmicutes	Clostridia	Lachnospirales	Lachnospiraceae	Enterocloster	Enterocloster clostridioformis
CN31.bin.78	clu_111	231	5110815	38159	9403	140533	50.75	32.04	93.77	4.01	73.72	Bacteria	Firmicutes	Clostridia	Lachnospirales	Lachnospiraceae	Enterocloster	Enterocloster aldenensis
PE31.bin.48	clu_112	696	4745522	8279	3372	50859	50.43	8.26	79.45	0	79.45	Bacteria	Firmicutes	Clostridia	Lachnospirales	Lachnospiraceae	Enterocloster	Enterocloster citroniae
PE15.bin.10	clu_113	172	3262649	28393	8874	112531	44.12	11.78	99.29	1.9	89.79	Bacteria	Firmicutes	Clostridia	Lachnospirales	Lachnospiraceae	Enterocloster	Unknown
PE05.bin.46	clu_113	127	2968185	41073	10555	275920	44.18	14.37	87.72	4.63	64.57	Bacteria	Firmicutes	Clostridia	Lachnospirales	Lachnospiraceae	Enterocloster	Unknown
CN03.bin.16	clu_113	360	2574068	9150	3407	77404	44.39	9.08	77.11	0.84	72.91	Bacteria	Firmicutes	Clostridia	Lachnospirales	Lachnospiraceae	Enterocloster	Unknown
CN37.bin.35	clu_114	104	3101779	46408	16095	110549	43.01	18.31	95.02	0	95.02	Bacteria	Firmicutes	Clostridia	Lachnospirales	Lachnospiraceae	Enterocloster	Unknown
CN37.bin.63	clu_115	49	2820176	81386	32764	198485	47.3	22.29	98.18	0	98.18	Bacteria	Firmicutes	Clostridia	Lachnospirales	Lachnospiraceae	Enterocloster	Unknown
PE39.bin.24	clu_115	95	2835677	51117	13950	193190	47.27	57.45	94.47	2.32	82.87	Bacteria	Firmicutes	Clostridia	Lachnospirales	Lachnospiraceae	Enterocloster	Unknown
PE40.bin.48	clu_115	107	2709620	37140	13057	92734	47.36	12.91	93.69	0.63	90.54	Bacteria	Firmicutes	Clostridia	Lachnospirales	Lachnospiraceae	Enterocloster	Unknown
CN26.bin.82	clu_116	68	2797138	64066	19893	157319	49.02	35.15	91.05	0	91.05	Bacteria	Firmicutes	Clostridia	Lachnospirales	Lachnospiraceae	Enterocloster	Unknown
CN32.bin.1	clu_117	308	2438714	10624	3792	39583	39.69	11.07	93.29	1.29	86.84	Bacteria	Firmicutes	Clostridia	Oscillospirales	Ruminococcaceae	UBA1394	Unknown
PE26.bin.19	clu_118	138	2940748	31803	10130	142611	54.68	12.79	95.64	0.67	92.29	Bacteria	Firmicutes	Clostridia	Oscillospirales	Oscillospiraceae	Unknown	Unknown
CN29.bin.26	clu_119	115	2214872	29456	9272	118268	60.72	16.17	94.72	0	94.72	Bacteria	Firmicutes	Clostridia	Oscillospirales	CAG-382	UCG-010	Unknown
CN34.bin.94	clu_120	281	1355887	5296	2932	17750	46.41	6.76	75.73	0.75	71.98	Bacteria	Firmicutes	Clostridia	Peptostreptococcales	Anaerovoracaceae	Mogibacterium	Unknown
CN02.bin.28	clu_121	140	2291997	24230	8209	82044	52.49	11.63	84	3.92	64.4	Bacteria	Firmicutes	Clostridia	Lachnospirales	Lachnospiraceae	Dorea	Dorea phocaeensis
CN17.bin.57	clu_121	391	1987369	5858	2787	25839	52.58	8.1	71.28	3.24	55.08	Bacteria	Firmicutes	Clostridia	Lachnospirales	Lachnospiraceae	Dorea	Dorea phocaeensis
CN34.bin.52	clu_122	354	2039364	6788	3065	22066	55.44	7.67	78.76	2.75	65.01	Bacteria	Firmicutes	Clostridia	Lachnospirales	Lachnospiraceae	Dorea	Unknown
CN17.bin.71	clu_123	82	2121660	41105	12816	110796	52.76	15.31	92.98	0	92.98	Bacteria	Firmicutes	Clostridia	Lachnospirales	Lachnospiraceae	Dorea	Unknown
PE21.bin.31	clu_123	36	2229390	102407	27799	334937	52.29	26.25	95.91	0.29	94.46	Bacteria	Firmicutes	Clostridia	Lachnospirales	Lachnospiraceae	Dorea	Unknown
CN16.bin.38	clu_124	109	2567797	39839	10677	171122	48.24	12.38	93.57	1.17	87.72	Bacteria	Firmicutes	Clostridia	Lachnospirales	Lachnospiraceae	Dorea	Dorea faecis
PE31.bin.64	clu_125	42	2259202	91929	21395	223103	53.72	65.87	95.94	1.8	86.94	Bacteria	Firmicutes	Negativicutes	Acidaminococcales	Acidaminococcaceae	Acidaminococcus	Acidaminococcus provencensis
CN02.bin.30	clu_125	287	1691961	6563	3090	28313	54.7	9.22	77.84	2.45	65.59	Bacteria	Firmicutes	Negativicutes	Acidaminococcales	Acidaminococcaceae	Acidaminococcus	Acidaminococcus provencensis
PE12.bin.28	clu_125	78	2231241	46641	12153	182215	53.88	19.3	96.88	1.2	90.88	Bacteria	Firmicutes	Negativicutes	Acidaminococcales	Acidaminococcaceae	Acidaminococcus	Acidaminococcus provencensis
CN17.bin.11	clu_126	160	1986437	17377	6186	50307	50.36	11.72	95.21	0.22	94.11	Bacteria	Firmicutes	Negativicutes	Acidaminococcales	Acidaminococcaceae	Acidaminococcus	Acidaminococcus intestini
PE09.bin.26	clu_127	54	3770389	94105	36403	344280	48.27	22.78	92.96	0	92.96	Bacteria	Firmicutes	Clostridia	Eubacteriales	Eubacteriaceae	Eubacterium	Eubacterium limosum
PE10.bin.43	clu_127	87	3437051	52626	20788	225585	48.29	21.59	86.6	0	86.6	Bacteria	Firmicutes	Clostridia	Eubacteriales	Eubacteriaceae	Eubacterium	Eubacterium limosum
CN29.bin.73	clu_128	18	1548231	103605	58001	254306	50.27	134.2	75.5	0.7	72	Bacteria	Firmicutes	Clostridia	Christensenellales	CAG-138	PeH17	Unknown
PE29.bin.108	clu_128	78	1834593	41915	11224	96986	49.71	14.63	92.26	1.34	85.56	Bacteria	Firmicutes	Clostridia	Christensenellales	CAG-138	PeH17	Unknown
CN21.bin.23	clu_129	298	2022012	8151	3554	35314	45.52	8.91	87.37	0	87.37	Bacteria	Firmicutes	Clostridia	Oscillospirales	Ruminococcaceae	Ruminiclostridium	Ruminiclostridium siraeum
PE04.bin.67	clu_129	44	2711213	96148	32537	219379	45.27	43.4	98.83	0.67	95.48	Bacteria	Firmicutes	Clostridia	Oscillospirales	Ruminococcaceae	Ruminiclostridium	Ruminiclostridium siraeum
PE08.bin.21	clu_129	40	2604644	127920	31814	288436	45	85.7	98.32	0	98.32	Bacteria	Firmicutes	Clostridia	Oscillospirales	Ruminococcaceae	Ruminiclostridium	Ruminiclostridium siraeum
CN11.bin.34	clu_130	34	1818232	87347	30727	133769	53.48	65.55	82.66	0	82.66	Bacteria	Firmicutes	Clostridia	Christensenellales	CAG-138	Phil1	Unknown
PE35.bin.68	clu_131	19	1567312	184584	37638	299253	37.35	38.13	77.85	0	77.85	Bacteria	Firmicutes	Clostridia	Oscillospirales	Acutalibacteraceae	Eubacterium	Unknown
PE33.bin.66	clu_131	245	1465221	7922	2931	50650	38.65	12.53	79.84	0.24	78.64	Bacteria	Firmicutes	Clostridia	Oscillospirales	Acutalibacteraceae	Eubacterium	Unknown
CN22.bin.38	clu_131	31	1934893	87371	35606	198960	38.01	84.57	96.22	0.69	92.77	Bacteria	Firmicutes	Clostridia	Oscillospirales	Acutalibacteraceae	Eubacterium	Unknown
PE27.bin.34	clu_131	18	1792655	235597	49601	459124	38.05	25.85	95.97	0	95.97	Bacteria	Firmicutes	Clostridia	Oscillospirales	Acutalibacteraceae	Eubacterium	Unknown
PE28.bin.8	clu_131	12	1943819	251079	69551	487489	37.98	22.27	97.99	0	97.99	Bacteria	Firmicutes	Clostridia	Oscillospirales	Acutalibacteraceae	Eubacterium	Unknown
PE26.bin.44	clu_131	30	1936444	137165	23382	367836	38.08	22.25	98.66	0	98.66	Bacteria	Firmicutes	Clostridia	Oscillospirales	Acutalibacteraceae	Eubacterium	Unknown
PE07.bin.56	clu_132	592	2596328	4990	2322	27481	35.34	9.36	83.38	4.97	58.53	Bacteria	Firmicutes	Clostridia	Oscillospirales	Acutalibacteraceae	Eubacterium	Unknown
CN14.bin.37	clu_132	187	1780971	13757	4421	46520	36.41	11.33	91.7	0.67	88.35	Bacteria	Firmicutes	Clostridia	Oscillospirales	Acutalibacteraceae	Eubacterium	Unknown
PE17.bin.3	clu_132	23	1745845	135991	41991	250081	36.6	35.91	95.3	0	95.3	Bacteria	Firmicutes	Clostridia	Oscillospirales	Acutalibacteraceae	Eubacterium	Unknown
PE04.bin.79	clu_132	58	1726449	50290	14084	127708	36.37	13.27	96.64	0	96.64	Bacteria	Firmicutes	Clostridia	Oscillospirales	Acutalibacteraceae	Eubacterium	Unknown
CN10.bin.51	clu_133	131	1823637	18884	6721	96254	43.89	26.8	92.3	1.17	86.45	Bacteria	Firmicutes	Clostridia	Oscillospirales	Acutalibacteraceae	Eubacterium	Unknown
CN21.bin.2	clu_134	248	1811621	9568	3279	59941	34.09	9.43	80.49	3.36	63.69	Bacteria	Firmicutes	Clostridia	Lachnospirales	CAG-274	CAG-274	Unknown
CN04.bin.22	clu_134	115	2138693	30022	7678	235805	33.75	10.76	93.74	2.24	82.54	Bacteria	Firmicutes	Clostridia	Lachnospirales	CAG-274	CAG-274	Unknown
PE17.bin.67	clu_135	340	1773222	5947	2772	22637	36.38	11.03	83.5	3.43	66.35	Bacteria	Firmicutes	Clostridia	Oscillospirales	Acutalibacteraceae	GCA-900066995	Unknown
CN17.bin.102	clu_135	35	2129903	123223	30335	286882	36.49	29.41	98.66	0.34	96.96	Bacteria	Firmicutes	Clostridia	Oscillospirales	Acutalibacteraceae	GCA-900066995	Unknown
PE36.bin.31	clu_136	267	1597579	8026	2891	23895	39.02	9.54	79.87	3.02	64.77	Bacteria	Firmicutes	Clostridia	Monoglobales	UBA1381	CAG-41	Unknown
PE12.bin.51	clu_136	300	1276117	4528	2520	20636	38.94	10.94	70.1	0.17	69.25	Bacteria	Firmicutes	Clostridia	Monoglobales	UBA1381	CAG-41	Unknown
PE28.bin.94	clu_136	29	1954525	98364	41543	191379	37.85	45.98	75	1.01	69.95	Bacteria	Firmicutes	Clostridia	Monoglobales	UBA1381	CAG-41	Unknown
PE20.bin.10	clu_136	351	1959322	6615	2777	35583	38.5	8.21	79.17	1.68	70.77	Bacteria	Firmicutes	Clostridia	Monoglobales	UBA1381	CAG-41	Unknown
PE05.bin.1	clu_136	20	1616827	124244	45479	215272	38.77	35.58	70.81	0	70.81	Bacteria	Firmicutes	Clostridia	Monoglobales	UBA1381	CAG-41	Unknown
PE09.bin.24	clu_136	191	1538955	11854	3510	56025	39.26	11.38	72.9	0	72.9	Bacteria	Firmicutes	Clostridia	Monoglobales	UBA1381	CAG-41	Unknown
PE25.bin.28	clu_136	263	1754041	8578	3180	52207	39.05	9.12	79.65	1.12	74.05	Bacteria	Firmicutes	Clostridia	Monoglobales	UBA1381	CAG-41	Unknown
PE38.bin.44	clu_136	186	2450163	19174	6127	76522	38.08	21.3	89.93	2.35	78.18	Bacteria	Firmicutes	Clostridia	Monoglobales	UBA1381	CAG-41	Unknown
CN27.bin.34	clu_136	248	2239020	12032	4443	50224	38.31	9.33	91.88	2.68	78.48	Bacteria	Firmicutes	Clostridia	Monoglobales	UBA1381	CAG-41	Unknown
CN35.bin.48	clu_136	175	2048683	17647	4977	66312	38.32	9.64	89.29	1.79	80.34	Bacteria	Firmicutes	Clostridia	Monoglobales	UBA1381	CAG-41	Unknown
CN04.bin.18	clu_136	290	2002218	8849	3358	43286	38.36	7.94	86.45	1.01	81.4	Bacteria	Firmicutes	Clostridia	Monoglobales	UBA1381	CAG-41	Unknown
PE14.bin.32	clu_136	143	1999979	26735	5975	63192	38.8	23.17	93.96	1.01	88.91	Bacteria	Firmicutes	Clostridia	Monoglobales	UBA1381	CAG-41	Unknown
PE02.bin.51	clu_136	34	2461987	117792	39594	297643	38.39	24.76	92.53	0.67	89.18	Bacteria	Firmicutes	Clostridia	Monoglobales	UBA1381	CAG-41	Unknown
PE37.bin.34	clu_136	110	2277759	33916	8892	163250	38.66	17.18	95.3	0.5	92.8	Bacteria	Firmicutes	Clostridia	Monoglobales	UBA1381	CAG-41	Unknown
CN36.bin.24	clu_136	29	2436341	136782	50365	387300	38.53	31.76	96.64	0.67	93.29	Bacteria	Firmicutes	Clostridia	Monoglobales	UBA1381	CAG-41	Unknown
PE32.bin.48	clu_136	39	2571897	107588	35997	265264	38.24	15.24	96.64	0.67	93.29	Bacteria	Firmicutes	Clostridia	Monoglobales	UBA1381	CAG-41	Unknown
CN20.bin.53	clu_136	76	2625710	55807	17642	157773	37.99	15.05	97.32	0.67	93.97	Bacteria	Firmicutes	Clostridia	Monoglobales	UBA1381	CAG-41	Unknown
PE39.bin.14	clu_136	308	2175386	9019	3507	52764	38.32	19.07	88.34	2.47	75.99	Bacteria	Firmicutes	Clostridia	Monoglobales	UBA1381	CAG-41	Unknown
PE17.bin.77	clu_137	80	2157737	50263	12070	166359	33.8	34.86	97.99	0	97.99	Bacteria	Firmicutes	Clostridia	Oscillospirales	Acutalibacteraceae	Ruminococcus	Unknown
PE22.bin.35	clu_137	120	1994469	22912	7707	103482	33.63	26.75	95.3	0.02	95.2	Bacteria	Firmicutes	Clostridia	Oscillospirales	Acutalibacteraceae	Ruminococcus	Unknown
CN07.bin.10	clu_138	32	2097401	113654	36061	259904	40.84	43.94	99.33	1.01	94.28	Bacteria	Firmicutes	Clostridia	Oscillospirales	Acutalibacteraceae	Ruminococcus	Ruminococcus bromii
CN30.bin.29	clu_138	72	1948163	36465	14374	117870	40.95	18.12	97.48	1.68	89.08	Bacteria	Firmicutes	Clostridia	Oscillospirales	Acutalibacteraceae	Ruminococcus	Ruminococcus bromii
CN06.bin.18	clu_138	24	1765616	120283	49342	397891	41.05	84.01	89.26	1.34	82.56	Bacteria	Firmicutes	Clostridia	Oscillospirales	Acutalibacteraceae	Ruminococcus	Ruminococcus bromii
CN17.bin.12	clu_138	23	2030305	104183	35724	519040	40.95	494.82	98.32	0.67	94.97	Bacteria	Firmicutes	Clostridia	Oscillospirales	Acutalibacteraceae	Ruminococcus	Ruminococcus bromii
PE04.bin.5	clu_138	37	1963155	119396	29088	198711	40.94	15.2	99.33	1.01	94.28	Bacteria	Firmicutes	Clostridia	Oscillospirales	Acutalibacteraceae	Ruminococcus	Ruminococcus bromii
CN29.bin.75	clu_138	142	1881880	25467	5129	153718	41.24	10.79	89.6	0.89	85.15	Bacteria	Firmicutes	Clostridia	Oscillospirales	Acutalibacteraceae	Ruminococcus	Ruminococcus bromii
CN14.bin.66	clu_138	15	2008960	212756	74968	711004	40.95	93.93	95.3	0.67	91.95	Bacteria	Firmicutes	Clostridia	Oscillospirales	Acutalibacteraceae	Ruminococcus	Ruminococcus bromii
PE13.bin.1	clu_138	14	2010695	188390	108616	531070	41.06	341.63	99.33	1.01	94.28	Bacteria	Firmicutes	Clostridia	Oscillospirales	Acutalibacteraceae	Ruminococcus	Ruminococcus bromii
CN16.bin.1	clu_138	16	1828676	210306	75842	313857	40.77	73.29	78.52	1.01	73.47	Bacteria	Firmicutes	Clostridia	Oscillospirales	Acutalibacteraceae	Ruminococcus	Ruminococcus bromii
PE08.bin.17	clu_138	38	2100936	87276	29671	250225	40.77	37.3	98.66	1.01	93.61	Bacteria	Firmicutes	Clostridia	Oscillospirales	Acutalibacteraceae	Ruminococcus	Ruminococcus bromii
CN27.bin.11	clu_138	19	1847560	175692	39586	374358	41.15	97.66	98.66	0.67	95.31	Bacteria	Firmicutes	Clostridia	Oscillospirales	Acutalibacteraceae	Ruminococcus	Ruminococcus bromii
PE30.bin.16	clu_138	15	1940767	311811	64552	441854	40.73	68.41	97.32	0.34	95.62	Bacteria	Firmicutes	Clostridia	Oscillospirales	Acutalibacteraceae	Ruminococcus	Ruminococcus bromii
CN12.bin.25	clu_138	38	2112117	161084	27549	379846	41.4	61.97	76.51	0.67	73.16	Bacteria	Firmicutes	Clostridia	Oscillospirales	Acutalibacteraceae	Ruminococcus	Ruminococcus bromii
PE16.bin.24	clu_138	21	1803585	159174	41454	604267	40.74	152.18	88.59	4.7	65.09	Bacteria	Firmicutes	Clostridia	Oscillospirales	Acutalibacteraceae	Ruminococcus	Ruminococcus bromii
PE05.bin.20	clu_138	20	2107835	249787	54851	456606	40.77	89.64	99.33	0.67	95.98	Bacteria	Firmicutes	Clostridia	Oscillospirales	Acutalibacteraceae	Ruminococcus	Ruminococcus bromii
PE38.bin.4	clu_138	19	1919629	155962	80148	268926	40.88	101.12	83.22	1.01	78.17	Bacteria	Firmicutes	Clostridia	Oscillospirales	Acutalibacteraceae	Ruminococcus	Ruminococcus bromii
PE35.bin.16	clu_138	8	1910711	1061187	123557	1061187	40.84	105.94	96.64	0.67	93.29	Bacteria	Firmicutes	Clostridia	Oscillospirales	Acutalibacteraceae	Ruminococcus	Ruminococcus bromii
PE21.bin.12	clu_138	11	2091645	304472	162403	464151	41.07	33.54	99.33	0.67	95.98	Bacteria	Firmicutes	Clostridia	Oscillospirales	Acutalibacteraceae	Ruminococcus	Ruminococcus bromii
PE33.bin.26	clu_138	179	1736992	15195	4026	78851	41.52	15.79	91	0.67	87.65	Bacteria	Firmicutes	Clostridia	Oscillospirales	Acutalibacteraceae	Ruminococcus	Ruminococcus bromii
PE20.bin.22	clu_138	10	1932528	212268	124626	465663	40.77	24.42	97.99	0	97.99	Bacteria	Firmicutes	Clostridia	Oscillospirales	Acutalibacteraceae	Ruminococcus	Ruminococcus bromii
PE06.bin.2	clu_138	229	1301882	7176	2843	28517	42.51	14.42	74.25	1.34	67.55	Bacteria	Firmicutes	Clostridia	Oscillospirales	Acutalibacteraceae	Ruminococcus	Ruminococcus bromii
PE01.bin.11	clu_138	27	1839697	128399	30512	240039	40.73	22.46	77.18	0.67	73.83	Bacteria	Firmicutes	Clostridia	Oscillospirales	Acutalibacteraceae	Ruminococcus	Ruminococcus bromii
CN20.bin.71	clu_138	13	1904363	274043	69327	424745	41.06	200.17	93.96	1.01	88.91	Bacteria	Firmicutes	Clostridia	Oscillospirales	Acutalibacteraceae	Ruminococcus	Ruminococcus bromii
CN22.bin.3	clu_138	35	1842234	81492	24052	187012	41.2	288.47	81.54	2.01	71.49	Bacteria	Firmicutes	Clostridia	Oscillospirales	Acutalibacteraceae	Ruminococcus	Ruminococcus bromii
PE14.bin.45	clu_139	61	1843714	49833	17739	139296	39.11	62.89	91.95	0.34	90.25	Bacteria	Firmicutes	Clostridia	Oscillospirales	Acutalibacteraceae	Ruminococcus	Unknown
PE08.bin.69	clu_139	52	2065104	70011	19774	205254	38.79	157.41	98.32	0.34	96.62	Bacteria	Firmicutes	Clostridia	Oscillospirales	Acutalibacteraceae	Ruminococcus	Unknown
CN06.bin.28	clu_139	85	2229351	41174	14561	104157	38.38	31.25	97.99	2.35	86.24	Bacteria	Firmicutes	Clostridia	Oscillospirales	Acutalibacteraceae	Ruminococcus	Unknown
PE19.bin.42	clu_139	46	1961070	56959	19505	224222	38.8	53.12	97.99	0.34	96.29	Bacteria	Firmicutes	Clostridia	Oscillospirales	Acutalibacteraceae	Ruminococcus	Unknown
CN19.bin.55	clu_139	142	2002075	20768	6608	75463	38.82	16.91	96.48	0.56	93.68	Bacteria	Firmicutes	Clostridia	Oscillospirales	Acutalibacteraceae	Ruminococcus	Unknown
CN28.bin.60	clu_139	59	1963755	45553	19787	144187	38.8	32.5	92.28	1.01	87.23	Bacteria	Firmicutes	Clostridia	Oscillospirales	Acutalibacteraceae	Ruminococcus	Unknown
PE26.bin.49	clu_139	38	1995483	72181	22953	305478	38.93	23.28	98.66	0.34	96.96	Bacteria	Firmicutes	Clostridia	Oscillospirales	Acutalibacteraceae	Ruminococcus	Unknown
CN18.bin.28	clu_139	334	1940744	7020	2951	39315	39.18	42.52	89.65	2.09	79.2	Bacteria	Firmicutes	Clostridia	Oscillospirales	Acutalibacteraceae	Ruminococcus	Unknown
CN21.bin.18	clu_139	41	1971147	69575	29422	297660	38.24	86.61	74.14	0.86	69.84	Bacteria	Firmicutes	Clostridia	Oscillospirales	Acutalibacteraceae	Ruminococcus	Unknown
PE02.bin.62	clu_140	41	1983020	67362	22043	308122	39.59	201.65	95.3	0.34	93.6	Bacteria	Firmicutes	Clostridia	Oscillospirales	Acutalibacteraceae	Ruminococcus	Unknown
CN17.bin.107	clu_141	13	1287238	231637	38793	287341	26.69	32.58	92.42	3.37	75.57	Bacteria	Firmicutes	Bacilli	RF39	CAG-302	CAG-302	Unknown
PE09.bin.108	clu_141	22	1271555	105251	28321	132877	26.57	25.12	89.04	1.12	83.44	Bacteria	Firmicutes	Bacilli	RF39	CAG-302	CAG-302	Unknown
PE23.bin.57	clu_141	23	1184488	119827	22479	154555	26.85	57.14	90.17	1.12	84.57	Bacteria	Firmicutes	Bacilli	RF39	CAG-302	CAG-302	Unknown
PE29.bin.44	clu_141	42	1317012	53515	19918	111810	26.49	16.24	90.17	1.12	84.57	Bacteria	Firmicutes	Bacilli	RF39	CAG-302	CAG-302	Unknown
CN06.bin.77	clu_141	35	1065597	55548	14606	96431	26.77	13.23	85.11	0	85.11	Bacteria	Firmicutes	Bacilli	RF39	CAG-302	CAG-302	Unknown
CN06.bin.66	clu_142	36	1291046	85444	19448	188388	26.04	43.04	91.57	4.49	69.12	Bacteria	Firmicutes	Bacilli	RF39	CAG-302	CAG-302	Unknown
CN11.bin.87	clu_142	45	1287425	57677	11508	211622	26.22	27.41	91.57	3.93	71.92	Bacteria	Firmicutes	Bacilli	RF39	CAG-302	CAG-302	Unknown
PE33.bin.12	clu_142	27	1239927	65694	20927	190877	26.13	25.3	92.7	3.93	73.05	Bacteria	Firmicutes	Bacilli	RF39	CAG-302	CAG-302	Unknown
PE17.bin.19	clu_142	85	1075511	16697	5990	66217	26.39	11.01	81.4	1.12	75.8	Bacteria	Firmicutes	Bacilli	RF39	CAG-302	CAG-302	Unknown
CN11.bin.2	clu_143	22	1319255	154393	23105	305343	29.38	38.8	92.13	0	92.13	Bacteria	Firmicutes	Bacilli	RF39	CAG-1000	CAG-605	Unknown
CN06.bin.17	clu_144	13	1098398	138709	32567	248728	27.69	17.53	92.42	1.12	86.82	Bacteria	Firmicutes	Bacilli	RF39	CAG-433	CAG-594	Unknown
PE23.bin.30	clu_145	8	1227009	328893	188396	390081	27.68	50.89	93.26	2.41	81.21	Bacteria	Firmicutes	Bacilli	RF39	CAG-611	CAG-417	Unknown
CN37.bin.13	clu_146	345	2089461	6862	3002	54911	34.36	9.93	83.2	2.96	68.4	Bacteria	Firmicutes	Bacilli	Haloplasmatales	Turicibacteraceae	Turicibacter	Unknown
CN29.bin.59	clu_147	62	1848083	44723	15908	115953	53.43	42.4	97.58	1.08	92.18	Bacteria	Firmicutes	Clostridia	Christensenellales	CAG-138	SFEL01	Unknown
PE09.bin.58	clu_147	58	1909841	51111	15274	162850	53.52	39.84	98.39	1.08	92.99	Bacteria	Firmicutes	Clostridia	Christensenellales	CAG-138	SFEL01	Unknown
PE40.bin.46	clu_148	78	1547084	29086	11017	119609	30.89	15.46	75.51	0.79	71.56	Bacteria	Firmicutes	Negativicutes	Selenomonadales	Selenomonadaceae	Megamonas	Megamonas funiformis
PE27.bin.56	clu_148	386	2092997	6186	2639	53899	31.59	9.73	85.14	2.53	72.49	Bacteria	Firmicutes	Negativicutes	Selenomonadales	Selenomonadaceae	Megamonas	Megamonas funiformis
PE01.bin.39	clu_148	303	2073593	10702	2882	71402	31.47	11.06	86.88	2.55	74.13	Bacteria	Firmicutes	Negativicutes	Selenomonadales	Selenomonadaceae	Megamonas	Megamonas funiformis
CN12.bin.8	clu_148	51	1571939	57361	14221	166081	31.52	63.92	79.11	0.63	75.96	Bacteria	Firmicutes	Negativicutes	Selenomonadales	Selenomonadaceae	Megamonas	Megamonas funiformis
CN32.bin.50	clu_148	220	2235443	19924	3899	133721	31.36	15.74	91.46	0.84	87.26	Bacteria	Firmicutes	Negativicutes	Selenomonadales	Selenomonadaceae	Megamonas	Megamonas funiformis
PE02.bin.37	clu_148	272	2072856	10808	3288	51689	31.63	12.76	91.52	0.79	87.57	Bacteria	Firmicutes	Negativicutes	Selenomonadales	Selenomonadaceae	Megamonas	Megamonas funiformis
PE26.bin.24	clu_148	282	2180809	11901	3289	48538	31.21	11.19	93.02	0.95	88.27	Bacteria	Firmicutes	Negativicutes	Selenomonadales	Selenomonadaceae	Megamonas	Megamonas funiformis
PE40.bin.34	clu_149	80	3836714	85653	26123	166162	44.05	19.71	95.28	0	95.28	Bacteria	Firmicutes	Bacilli	Erysipelotrichales	Erysipelotrichaceae	Longicatena	Longicatena innocuum
PE31.bin.6	clu_149	55	3419806	97693	39025	304946	44.23	76.23	90.57	0	90.57	Bacteria	Firmicutes	Bacilli	Erysipelotrichales	Erysipelotrichaceae	Longicatena	Longicatena innocuum
PE34.bin.18	clu_149	136	3534063	46994	12425	217272	44.37	13.74	90.97	0	90.97	Bacteria	Firmicutes	Bacilli	Erysipelotrichales	Erysipelotrichaceae	Longicatena	Longicatena innocuum
PE10.bin.38	clu_149	140	3470653	41840	12101	82744	44.81	29.42	95.28	0	95.28	Bacteria	Firmicutes	Bacilli	Erysipelotrichales	Erysipelotrichaceae	Longicatena	Longicatena innocuum
CN02.bin.7	clu_149	239	3663751	23971	7669	73560	44.57	11.21	95.28	0	95.28	Bacteria	Firmicutes	Bacilli	Erysipelotrichales	Erysipelotrichaceae	Longicatena	Longicatena innocuum
CN04.bin.69	clu_149	191	3675683	28736	9042	181452	44.51	12.58	94.62	0	94.62	Bacteria	Firmicutes	Bacilli	Erysipelotrichales	Erysipelotrichaceae	Longicatena	Longicatena innocuum
CN37.bin.21	clu_149	59	3845286	133302	34351	276052	44.01	151.49	100	0	100	Bacteria	Firmicutes	Bacilli	Erysipelotrichales	Erysipelotrichaceae	Longicatena	Longicatena innocuum
PE24.bin.39	clu_149	395	3249034	10687	4118	31048	45.26	12.46	86.64	0	86.64	Bacteria	Firmicutes	Bacilli	Erysipelotrichales	Erysipelotrichaceae	Longicatena	Longicatena innocuum
CN31.bin.28	clu_150	56	4037511	104125	35315	352413	42.52	47.54	99.06	0	99.06	Bacteria	Firmicutes	Bacilli	Erysipelotrichales	Erysipelotrichaceae	Longicatena	Unknown
PE17.bin.54	clu_151	262	1561206	7700	2823	34080	29.49	61.75	71.3	4.7	47.8	Bacteria	Firmicutes	Clostridia	TANB77	CAG-508	CAG-245	Unknown
PE30.bin.21	clu_151	124	1364951	17650	5010	71928	29.95	99.17	71.52	2.68	58.12	Bacteria	Firmicutes	Clostridia	TANB77	CAG-508	CAG-245	Unknown
PE07.bin.42	clu_151	88	1647232	34083	8302	100486	29.88	20.47	77.45	3.52	59.85	Bacteria	Firmicutes	Clostridia	TANB77	CAG-508	CAG-245	Unknown
CN30.bin.24	clu_151	17	1452446	111747	66610	189756	29.7	51.55	71.08	1.23	64.93	Bacteria	Firmicutes	Clostridia	TANB77	CAG-508	CAG-245	Unknown
PE08.bin.5	clu_151	21	1551183	131338	40116	259253	29.64	26.33	78.12	0.45	75.87	Bacteria	Firmicutes	Clostridia	TANB77	CAG-508	CAG-245	Unknown
PE23.bin.34	clu_151	13	1545693	208881	85792	465167	29.63	25.48	79.46	0.67	76.11	Bacteria	Firmicutes	Clostridia	TANB77	CAG-508	CAG-245	Unknown
CN10.bin.36	clu_152	142	1786833	18167	6240	70176	28.07	27.3	72.93	1.25	66.68	Bacteria	Firmicutes	Clostridia	TANB77	CAG-508	CAG-269	Unknown
PE17.bin.87	clu_153	24	1464172	103870	34215	203156	26.38	50.01	74.88	1.79	65.93	Bacteria	Firmicutes	Clostridia	TANB77	CAG-508	CAG-269	Unknown
PE04.bin.47	clu_154	36	1406152	71812	17478	134808	29.65	24.39	78.23	2.24	67.03	Bacteria	Firmicutes	Clostridia	TANB77	CAG-508	CAG-245	Unknown
PE07.bin.6	clu_155	75	1629485	34108	11966	80586	27.2	55.11	78.68	2.01	68.63	Bacteria	Firmicutes	Clostridia	TANB77	CAG-508	CAG-492	Unknown
PE08.bin.22	clu_155	71	1611038	36996	10963	81226	27.05	17.28	79.35	2.01	69.3	Bacteria	Firmicutes	Clostridia	TANB77	CAG-508	CAG-492	Unknown
PE04.bin.60	clu_156	39	1368679	94548	18815	206073	26.69	27.61	76.67	1.4	69.67	Bacteria	Firmicutes	Clostridia	TANB77	CAG-465	CAG-465	Unknown
PE04.bin.51	clu_157	68	1211734	26636	9337	73406	29.75	12.72	73.12	0.89	68.67	Bacteria	Firmicutes	Clostridia	TANB77	CAG-508	UMGS1781	Unknown
CN23.bin.16	clu_158	136	1324555	16830	3691	51065	32.77	38.67	94.63	1.37	87.78	Bacteria	Firmicutes	Bacilli	Lactobacillales	Lactobacillaceae	Ligilactobacillus	Ligilactobacillus salivarius
PE31.bin.11	clu_158	40	1916953	79644	24393	184711	32.65	24.29	96.86	0	96.86	Bacteria	Firmicutes	Bacilli	Lactobacillales	Lactobacillaceae	Ligilactobacillus	Ligilactobacillus salivarius
PE24.bin.19	clu_158	35	1486960	57162	23660	227533	32.68	64.09	80.1	0.52	77.5	Bacteria	Firmicutes	Bacilli	Lactobacillales	Lactobacillaceae	Ligilactobacillus	Ligilactobacillus salivarius
CN05.bin.87	clu_159	46	1443844	54182	17015	159515	44.42	132.84	71.2	0.52	68.6	Bacteria	Firmicutes	Bacilli	Lactobacillales	Lactobacillaceae	Ligilactobacillus	Ligilactobacillus ruminis
CN37.bin.27	clu_160	230	2896241	20798	5402	85435	28.57	15.52	82.76	3.45	65.51	Bacteria	Firmicutes	Clostridia	Peptostreptococcales	Peptostreptococcaceae	Intestinibacter	Intestinibacter bartlettii
PE28.bin.72	clu_160	55	3083587	85902	30513	292110	28.43	15.33	97.18	0	97.18	Bacteria	Firmicutes	Clostridia	Peptostreptococcales	Peptostreptococcaceae	Intestinibacter	Intestinibacter bartlettii
CN25.bin.106	clu_160	38	2959368	195115	54523	472900	28.51	17.4	96.7	0	96.7	Bacteria	Firmicutes	Clostridia	Peptostreptococcales	Peptostreptococcaceae	Intestinibacter	Intestinibacter bartlettii
PE05.bin.65	clu_160	248	2908650	16774	5435	57586	28.65	10.38	95.97	0.35	94.22	Bacteria	Firmicutes	Clostridia	Peptostreptococcales	Peptostreptococcaceae	Intestinibacter	Intestinibacter bartlettii
PE31.bin.9	clu_160	108	2924181	40829	14252	154370	28.47	68.02	82.76	0	82.76	Bacteria	Firmicutes	Clostridia	Peptostreptococcales	Peptostreptococcaceae	Intestinibacter	Intestinibacter bartlettii
CN35.bin.76	clu_160	29	2828840	203565	45343	464055	28.48	29.14	83.62	0	83.62	Bacteria	Firmicutes	Clostridia	Peptostreptococcales	Peptostreptococcaceae	Intestinibacter	Intestinibacter bartlettii
CN16.bin.33	clu_161	363	1735762	5526	2390	40212	27.66	8.27	75	0	75	Bacteria	Firmicutes	Clostridia	Peptostreptococcales	Peptostreptococcaceae	Romboutsia	Romboutsia timonensis
PE11.bin.20	clu_161	186	2732582	22001	6896	130036	26.99	18.3	70.69	1.72	62.09	Bacteria	Firmicutes	Clostridia	Peptostreptococcales	Peptostreptococcaceae	Romboutsia	Romboutsia timonensis
CN30.bin.6	clu_162	346	2554182	9531	3586	36716	26.8	16.32	81.03	2.59	68.08	Bacteria	Firmicutes	Clostridia	Clostridiales	Clostridiaceae	Clostridium	Unknown
CN24.bin.41	clu_163	36	1692917	68270	27978	251745	31.17	15.29	100	0	100	Archaea	Euryarchaeota	Methanobacteria	Methanobacteriales	Methanobacteriaceae	Methanobrevibacter	Methanobrevibacter smithii
CN29.bin.57	clu_163	81	1825457	43935	11313	211239	31.13	12.62	100	0	100	Archaea	Euryarchaeota	Methanobacteria	Methanobacteriales	Methanobacteriaceae	Methanobrevibacter	Methanobrevibacter smithii
PE04.bin.71	clu_163	19	1790357	124571	51865	323017	31.11	30.82	100	0	100	Archaea	Euryarchaeota	Methanobacteria	Methanobacteriales	Methanobacteriaceae	Methanobrevibacter	Methanobrevibacter smithii
PE26.bin.11	clu_164	94	2210140	34947	12092	83969	33.72	106.98	95.28	0.71	91.73	Bacteria	Firmicutes	Bacilli	Erysipelotrichales	Erysipelotrichaceae	Holdemanella	Holdemanella biformis
CN19.bin.32	clu_164	338	1944426	6931	2837	37217	33.5	9.43	82.97	1.65	74.72	Bacteria	Firmicutes	Bacilli	Erysipelotrichales	Erysipelotrichaceae	Holdemanella	Holdemanella biformis
CN29.bin.84	clu_164	122	2196577	30494	9197	67690	33.51	14.27	93.53	0.71	89.98	Bacteria	Firmicutes	Bacilli	Erysipelotrichales	Erysipelotrichaceae	Holdemanella	Holdemanella biformis
CN36.bin.104	clu_164	121	1992432	27092	8138	61076	33.33	33.97	70.89	0.71	67.34	Bacteria	Firmicutes	Bacilli	Erysipelotrichales	Erysipelotrichaceae	Holdemanella	Holdemanella biformis
PE38.bin.56	clu_164	65	1940098	42944	14675	109511	33.75	50.64	76.55	0	76.55	Bacteria	Firmicutes	Bacilli	Erysipelotrichales	Erysipelotrichaceae	Holdemanella	Holdemanella biformis
CN05.bin.36	clu_165	316	2103788	8305	3299	33678	33.93	14.32	87.96	1.42	80.86	Bacteria	Firmicutes	Bacilli	Erysipelotrichales	Erysipelotrichaceae	Holdemanella	Unknown
PE36.bin.56	clu_165	131	2006836	21861	7529	78671	34.05	20.71	94	0.84	89.8	Bacteria	Firmicutes	Bacilli	Erysipelotrichales	Erysipelotrichaceae	Holdemanella	Unknown
CN30.bin.26	clu_166	150	3733318	42185	11823	113962	39.78	181.82	97.33	3	82.33	Bacteria	Firmicutes	Bacilli	Bacillales	Amphibacillaceae	Oceanobacillus	Unknown
PE32.bin.52	clu_167	95	1873519	28833	10803	84534	39.26	11.2	94.77	0.53	92.12	Bacteria	Proteobacteria	Gammaproteobacteria	Enterobacterales	Pasteurellaceae	Haemophilus	Haemophilus parainfluenzae
CN04.bin.27	clu_168	223	1849158	12285	3423	96978	41.07	8.75	71.68	0.63	68.53	Bacteria	Firmicutes	Clostridia	Lachnospirales	Lachnospiraceae	Unknown	Unknown
PE29.bin.11	clu_169	136	2088834	21874	7213	76384	44.68	12.61	93.83	0.67	90.48	Bacteria	Firmicutes	Clostridia	Oscillospirales	Acutalibacteraceae	CAG-488	Unknown
CN05.bin.68	clu_170	125	1939191	27280	6718	62881	33.75	19.1	83.49	1.89	74.04	Bacteria	Firmicutes	Bacilli	Erysipelotrichales	Erysipelatoclostridiaceae	Catenibacterium	Unknown
PE23.bin.63	clu_170	192	2091014	15682	5011	58987	33.84	12.34	97.8	2.83	83.65	Bacteria	Firmicutes	Bacilli	Erysipelotrichales	Erysipelatoclostridiaceae	Catenibacterium	Unknown
CN14.bin.64	clu_171	63	2512270	68454	22764	156740	30.01	116.04	96.23	0.61	93.18	Bacteria	Firmicutes	Bacilli	Erysipelotrichales	Erysipelatoclostridiaceae	Erysipelatoclostridium	Unknown
CN35.bin.38	clu_171	166	2235398	20630	5816	74666	29.63	35.7	77.54	1.75	68.79	Bacteria	Firmicutes	Bacilli	Erysipelotrichales	Erysipelatoclostridiaceae	Erysipelatoclostridium	Unknown
CN25.bin.63	clu_172	83	2650281	59896	16937	191788	29.14	50.11	97.17	0	97.17	Bacteria	Firmicutes	Bacilli	Erysipelotrichales	Erysipelatoclostridiaceae	Erysipelatoclostridium	Unknown
PE02.bin.41	clu_172	58	2505708	67822	26430	234712	29.03	28.34	88.68	0	88.68	Bacteria	Firmicutes	Bacilli	Erysipelotrichales	Erysipelatoclostridiaceae	Erysipelatoclostridium	Unknown
PE03.bin.29	clu_172	66	2523830	70395	20460	214072	28.94	22.58	87.74	0	87.74	Bacteria	Firmicutes	Bacilli	Erysipelotrichales	Erysipelatoclostridiaceae	Erysipelatoclostridium	Unknown
PE34.bin.30	clu_172	69	2612480	63304	20026	207050	29.01	20.19	95.28	0	95.28	Bacteria	Firmicutes	Bacilli	Erysipelotrichales	Erysipelatoclostridiaceae	Erysipelatoclostridium	Unknown
CN03.bin.13	clu_172	74	2707981	57218	18479	181409	29.1	23.75	99.06	0	99.06	Bacteria	Firmicutes	Bacilli	Erysipelotrichales	Erysipelatoclostridiaceae	Erysipelatoclostridium	Unknown
PE01.bin.71	clu_172	92	2693848	48836	15084	129927	29.04	16.07	98.11	0	98.11	Bacteria	Firmicutes	Bacilli	Erysipelotrichales	Erysipelatoclostridiaceae	Erysipelatoclostridium	Unknown
PE05.bin.23	clu_172	63	2761086	60683	22504	179892	29.1	27.35	98.11	0	98.11	Bacteria	Firmicutes	Bacilli	Erysipelotrichales	Erysipelatoclostridiaceae	Erysipelatoclostridium	Unknown
CN27.bin.38	clu_172	184	2269771	17994	5633	126014	29.09	31.16	95.13	0	95.13	Bacteria	Firmicutes	Bacilli	Erysipelotrichales	Erysipelatoclostridiaceae	Erysipelatoclostridium	Unknown
CN17.bin.27	clu_172	223	2670489	15923	5915	80055	29.08	13.89	97.48	2.67	84.13	Bacteria	Firmicutes	Bacilli	Erysipelotrichales	Erysipelatoclostridiaceae	Erysipelatoclostridium	Unknown
CN13.bin.27	clu_172	99	2755541	44185	15722	167152	29.1	50.82	98.11	0.94	93.41	Bacteria	Firmicutes	Bacilli	Erysipelotrichales	Erysipelatoclostridiaceae	Erysipelatoclostridium	Unknown
CN16.bin.23	clu_172	95	2566859	46889	13516	133567	29.26	19.4	91.51	0	91.51	Bacteria	Firmicutes	Bacilli	Erysipelotrichales	Erysipelatoclostridiaceae	Erysipelatoclostridium	Unknown
PE27.bin.31	clu_172	61	2595595	69156	22318	181083	29.09	39.1	92.45	0	92.45	Bacteria	Firmicutes	Bacilli	Erysipelotrichales	Erysipelatoclostridiaceae	Erysipelatoclostridium	Unknown
PE13.bin.26	clu_172	82	2640901	54137	18348	181218	29.03	44.67	90.57	0	90.57	Bacteria	Firmicutes	Bacilli	Erysipelotrichales	Erysipelatoclostridiaceae	Erysipelatoclostridium	Unknown
CN07.bin.34	clu_172	188	2628354	21297	6710	78456	28.89	27.48	96.7	0	96.7	Bacteria	Firmicutes	Bacilli	Erysipelotrichales	Erysipelatoclostridiaceae	Erysipelatoclostridium	Unknown
PE29.bin.35	clu_172	420	1713075	4280	2395	20481	29.67	7.88	75.47	2.52	62.87	Bacteria	Firmicutes	Bacilli	Erysipelotrichales	Erysipelatoclostridiaceae	Erysipelatoclostridium	Unknown
CN30.bin.9	clu_172	239	2601597	17459	4869	62132	29.16	19.18	95.28	3.46	77.98	Bacteria	Firmicutes	Bacilli	Erysipelotrichales	Erysipelatoclostridiaceae	Erysipelatoclostridium	Unknown
CN10.bin.53	clu_172	101	2764055	44801	16047	183530	29.15	129.18	91.51	3.3	75.01	Bacteria	Firmicutes	Bacilli	Erysipelotrichales	Erysipelatoclostridiaceae	Erysipelatoclostridium	Unknown
PE38.bin.2	clu_172	243	2926281	18913	5395	61447	29.18	18.06	95.51	1.89	86.06	Bacteria	Firmicutes	Bacilli	Erysipelotrichales	Erysipelatoclostridiaceae	Erysipelatoclostridium	Unknown
CN31.bin.31	clu_172	315	3082721	16789	3975	53159	28.92	10.03	88.91	0.94	84.21	Bacteria	Firmicutes	Bacilli	Erysipelotrichales	Erysipelatoclostridiaceae	Erysipelatoclostridium	Unknown
CN04.bin.73	clu_172	373	2426689	8606	3036	50524	28.97	8.78	76.32	0	76.32	Bacteria	Firmicutes	Bacilli	Erysipelotrichales	Erysipelatoclostridiaceae	Erysipelatoclostridium	Unknown
PE12.bin.31	clu_172	359	2759543	9612	3701	70339	29.16	21.56	89.87	1.18	83.97	Bacteria	Firmicutes	Bacilli	Erysipelotrichales	Erysipelatoclostridiaceae	Erysipelatoclostridium	Unknown
CN34.bin.55	clu_172	74	2679809	54103	18933	284422	28.88	27.93	82.46	0	82.46	Bacteria	Firmicutes	Bacilli	Erysipelotrichales	Erysipelatoclostridiaceae	Erysipelatoclostridium	Unknown
CN33.bin.31	clu_172	66	2904762	64684	22794	234482	29.32	87.97	82.46	0	82.46	Bacteria	Firmicutes	Bacilli	Erysipelotrichales	Erysipelatoclostridiaceae	Erysipelatoclostridium	Unknown
CN35.bin.20	clu_172	317	1919182	7510	2910	29290	28.46	9.96	72.4	1.89	62.95	Bacteria	Firmicutes	Bacilli	Erysipelotrichales	Erysipelatoclostridiaceae	Erysipelatoclostridium	Unknown
CN26.bin.35	clu_173	250	3032775	17896	5686	78290	30.27	11.1	98.4	1.89	88.95	Bacteria	Firmicutes	Bacilli	Erysipelotrichales	Erysipelatoclostridiaceae	Longibaculum	Longibaculum muris
PE31.bin.3	clu_174	614	3150637	5915	2779	30917	31.24	7.87	89.01	1.26	82.71	Bacteria	Firmicutes	Bacilli	Erysipelotrichales	Erysipelatoclostridiaceae	Coprobacillus	Coprobacillus cateniformis
PE28.bin.60	clu_175	148	2556317	28458	8348	116896	31.13	23.67	89.15	0	89.15	Bacteria	Firmicutes	Bacilli	Erysipelotrichales	Erysipelatoclostridiaceae	Massiliomicrobiota	Unknown
PE11.bin.5	clu_176	80	2911283	58686	21206	265329	31.32	57.47	88.68	0	88.68	Bacteria	Firmicutes	Bacilli	Erysipelotrichales	Erysipelatoclostridiaceae	Erysipelatoclostridium	Erysipelatoclostridium ramosum
CN08.bin.21	clu_176	595	3437589	7374	2759	30458	31.54	11.99	89.31	2.83	75.16	Bacteria	Firmicutes	Bacilli	Erysipelotrichales	Erysipelatoclostridiaceae	Erysipelatoclostridium	Erysipelatoclostridium ramosum
CN15.bin.43	clu_176	97	3402948	74833	16741	278410	31.21	52.24	100	0	100	Bacteria	Firmicutes	Bacilli	Erysipelotrichales	Erysipelatoclostridiaceae	Erysipelatoclostridium	Erysipelatoclostridium ramosum
PE31.bin.18	clu_176	40	3283284	123408	49215	344292	31.15	51.98	100	0	100	Bacteria	Firmicutes	Bacilli	Erysipelotrichales	Erysipelatoclostridiaceae	Erysipelatoclostridium	Erysipelatoclostridium ramosum
PE40.bin.15	clu_176	82	3654378	108382	20543	283347	31.44	19.83	99.06	0.13	98.41	Bacteria	Firmicutes	Bacilli	Erysipelotrichales	Erysipelatoclostridiaceae	Erysipelatoclostridium	Erysipelatoclostridium ramosum
PE32.bin.25	clu_176	65	3573246	121042	26901	329426	31.25	30.52	100	0.47	97.65	Bacteria	Firmicutes	Bacilli	Erysipelotrichales	Erysipelatoclostridiaceae	Erysipelatoclostridium	Erysipelatoclostridium ramosum
CN02.bin.17	clu_176	68	3464874	89241	25738	277800	31.2	142.82	100	0	100	Bacteria	Firmicutes	Bacilli	Erysipelotrichales	Erysipelatoclostridiaceae	Erysipelatoclostridium	Erysipelatoclostridium ramosum
PE15.bin.2	clu_176	54	3479887	106905	27760	252363	31.3	57.3	100	0	100	Bacteria	Firmicutes	Bacilli	Erysipelotrichales	Erysipelatoclostridiaceae	Erysipelatoclostridium	Erysipelatoclostridium ramosum
CN37.bin.22	clu_176	41	3532927	123428	54527	357035	31.36	81.32	100	0	100	Bacteria	Firmicutes	Bacilli	Erysipelotrichales	Erysipelatoclostridiaceae	Erysipelatoclostridium	Erysipelatoclostridium ramosum
PE18.bin.8	clu_176	65	3511211	97182	25324	365871	31.31	57.36	100	0	100	Bacteria	Firmicutes	Bacilli	Erysipelotrichales	Erysipelatoclostridiaceae	Erysipelatoclostridium	Erysipelatoclostridium ramosum
CN17.bin.101	clu_177	106	2578075	43640	12404	113877	28.03	37.86	97.17	0.94	92.47	Bacteria	Firmicutes	Bacilli	Erysipelotrichales	Erysipelatoclostridiaceae	Erysipelatoclostridium	Unknown
PE27.bin.48	clu_178	276	1785613	8017	3036	30523	38.21	9.01	90.48	3.07	75.13	Bacteria	Firmicutes	Bacilli	Erysipelotrichales	Erysipelotrichaceae	Longicatena	Longicatena dolichum
CN12.bin.14	clu_178	42	1905036	86354	25519	170631	37.48	46.89	89.62	0	89.62	Bacteria	Firmicutes	Bacilli	Erysipelotrichales	Erysipelotrichaceae	Longicatena	Longicatena dolichum
CN15.bin.29	clu_179	75	3889581	77883	24826	275790	34.67	18.75	97.17	0	97.17	Bacteria	Firmicutes	Bacilli	Erysipelotrichales	Erysipelotrichaceae	Longicatena	Unknown
CN26.bin.25	clu_180	51	2824602	80179	30701	202469	37.63	33.44	100	0	100	Bacteria	Firmicutes	Bacilli	Erysipelotrichales	Erysipelotrichaceae	Longicatena	Longicatena caecimuris
PE10.bin.37	clu_181	75	5133191	136014	34772	258985	57.7	525.9	98.74	2.12	88.14	Bacteria	Proteobacteria	Gammaproteobacteria	Enterobacterales	Enterobacteriaceae	Klebsiella	Klebsiella pneumoniae
PE31.bin.12	clu_181	65	5129799	121484	40263	287473	57.55	195.87	95.58	2.18	84.68	Bacteria	Proteobacteria	Gammaproteobacteria	Enterobacterales	Enterobacteriaceae	Klebsiella	Klebsiella pneumoniae
PE22.bin.3	clu_181	165	4830371	50195	13908	119301	58.37	15.11	96.33	0.3	94.83	Bacteria	Proteobacteria	Gammaproteobacteria	Enterobacterales	Enterobacteriaceae	Klebsiella	Klebsiella pneumoniae
CN21.bin.4	clu_181	20	5278511	388491	101004	864078	57.55	65.08	98.81	0.41	96.76	Bacteria	Proteobacteria	Gammaproteobacteria	Enterobacterales	Enterobacteriaceae	Klebsiella	Klebsiella pneumoniae
CN13.bin.3	clu_181	74	5104252	105476	37882	273866	57.73	112.62	98.8	0.43	96.65	Bacteria	Proteobacteria	Gammaproteobacteria	Enterobacterales	Enterobacteriaceae	Klebsiella	Klebsiella pneumoniae
PE19.bin.49	clu_181	67	4941351	153925	38862	415385	57.83	27.04	99.12	0.8	95.12	Bacteria	Proteobacteria	Gammaproteobacteria	Enterobacterales	Enterobacteriaceae	Klebsiella	Klebsiella pneumoniae
CN32.bin.48	clu_181	75	5097648	167791	36990	464137	57.8	65.11	96	0.26	94.7	Bacteria	Proteobacteria	Gammaproteobacteria	Enterobacterales	Enterobacteriaceae	Klebsiella	Klebsiella pneumoniae
PE08.bin.63	clu_181	45	4799652	203295	55334	374876	58.08	36.57	97.69	0.04	97.49	Bacteria	Proteobacteria	Gammaproteobacteria	Enterobacterales	Enterobacteriaceae	Klebsiella	Klebsiella pneumoniae
PE24.bin.5	clu_181	129	4581557	54799	17365	295517	57.92	195.47	72.05	3.45	54.8	Bacteria	Proteobacteria	Gammaproteobacteria	Enterobacterales	Enterobacteriaceae	Klebsiella	Klebsiella pneumoniae
CN28.bin.16	clu_181	556	5123006	13236	4188	61467	58.21	134.77	93.81	4.46	71.51	Bacteria	Proteobacteria	Gammaproteobacteria	Enterobacterales	Enterobacteriaceae	Klebsiella	Klebsiella pneumoniae
PE04.bin.83	clu_181	486	4792445	13380	4544	55310	58.31	135.29	90.08	4	70.08	Bacteria	Proteobacteria	Gammaproteobacteria	Enterobacterales	Enterobacteriaceae	Klebsiella	Klebsiella pneumoniae
PE39.bin.6	clu_181	101	4785751	74852	23091	202666	58.1	29.65	92.94	0.22	91.84	Bacteria	Proteobacteria	Gammaproteobacteria	Enterobacterales	Enterobacteriaceae	Klebsiella	Klebsiella pneumoniae
PE11.bin.27	clu_182	27	3302785	190472	78534	540701	55.39	170.99	74.42	1.42	67.32	Bacteria	Proteobacteria	Gammaproteobacteria	Enterobacterales	Enterobacteriaceae	Klebsiella	Klebsiella aerogenes
PE29.bin.102	clu_183	279	3831665	21817	6213	82163	51.31	24.92	93.57	0.3	92.07	Bacteria	Proteobacteria	Gammaproteobacteria	Enterobacterales	Enterobacteriaceae	Escherichia	Escherichia flexneri
CN22.bin.11	clu_183	623	3433442	6343	2965	31332	51.42	14.77	80.55	2.06	70.25	Bacteria	Proteobacteria	Gammaproteobacteria	Enterobacterales	Enterobacteriaceae	Escherichia	Escherichia flexneri
CN06.bin.24	clu_183	513	3922291	10773	3482	39288	51.3	703.02	89.07	4.3	67.57	Bacteria	Proteobacteria	Gammaproteobacteria	Enterobacterales	Enterobacteriaceae	Escherichia	Escherichia flexneri
CN29.bin.89	clu_183	257	4175063	25767	7967	97720	51.13	33.57	95.21	1.02	90.11	Bacteria	Proteobacteria	Gammaproteobacteria	Enterobacterales	Enterobacteriaceae	Escherichia	Escherichia flexneri
PE21.bin.52	clu_183	512	4059979	11060	3696	68227	51.23	668.64	86.24	4.74	62.54	Bacteria	Proteobacteria	Gammaproteobacteria	Enterobacterales	Enterobacteriaceae	Escherichia	Escherichia coli
PE27.bin.39	clu_183	129	4345722	54150	16367	149675	50.94	26.31	98.09	1.03	92.94	Bacteria	Proteobacteria	Gammaproteobacteria	Enterobacterales	Enterobacteriaceae	Escherichia	Escherichia flexneri
CN31.bin.73	clu_183	279	4281331	23470	7445	112786	50.95	27.01	95.42	2.2	84.42	Bacteria	Proteobacteria	Gammaproteobacteria	Enterobacterales	Enterobacteriaceae	Escherichia	Escherichia flexneri
CN26.bin.76	clu_183	485	3805730	10584	3698	56986	51.31	149.12	88.39	4.16	67.59	Bacteria	Proteobacteria	Gammaproteobacteria	Enterobacterales	Enterobacteriaceae	Escherichia	Escherichia flexneri
CN13.bin.32	clu_183	108	4422693	63371	21308	178311	50.91	263.48	98.55	1.78	89.65	Bacteria	Proteobacteria	Gammaproteobacteria	Enterobacterales	Enterobacteriaceae	Escherichia	Escherichia flexneri
PE32.bin.42	clu_183	145	3371736	34970	11030	111913	51.55	71.98	78.91	0.25	77.66	Bacteria	Proteobacteria	Gammaproteobacteria	Enterobacterales	Enterobacteriaceae	Escherichia	Escherichia flexneri
CN02.bin.12	clu_183	82	4386545	86450	24394	213733	50.96	23.93	99.97	0.04	99.77	Bacteria	Proteobacteria	Gammaproteobacteria	Enterobacterales	Enterobacteriaceae	Escherichia	Escherichia flexneri
PE05.bin.49	clu_183	42	3672921	125143	41418	328115	51.13	101.41	82.41	0.04	82.21	Bacteria	Proteobacteria	Gammaproteobacteria	Enterobacterales	Enterobacteriaceae	Escherichia	Escherichia flexneri
PE36.bin.84	clu_183	272	4094986	20021	7619	91019	51.24	16.45	95.37	1.4	88.37	Bacteria	Proteobacteria	Gammaproteobacteria	Enterobacterales	Enterobacteriaceae	Escherichia	Escherichia flexneri
PE38.bin.50	clu_183	116	4571394	68266	18126	248468	51.02	86.31	98.33	0.63	95.18	Bacteria	Proteobacteria	Gammaproteobacteria	Enterobacterales	Enterobacteriaceae	Escherichia	Escherichia flexneri
PE06.bin.9	clu_183	310	3922176	17127	6202	63237	51.73	17.87	94.88	0.34	93.18	Bacteria	Proteobacteria	Gammaproteobacteria	Enterobacterales	Enterobacteriaceae	Escherichia	Escherichia flexneri
CN23.bin.10	clu_183	45	3844419	111139	46148	521715	51.12	209.31	88.47	0.19	87.52	Bacteria	Proteobacteria	Gammaproteobacteria	Enterobacterales	Enterobacteriaceae	Escherichia	Escherichia flexneri
PE40.bin.36	clu_183	266	4311071	25544	7467	110154	50.91	11.16	98.36	0.94	93.66	Bacteria	Proteobacteria	Gammaproteobacteria	Enterobacterales	Enterobacteriaceae	Escherichia	Escherichia flexneri
CN11.bin.95	clu_183	193	4188101	37507	9184	138905	51.12	46.33	97.23	1.57	89.38	Bacteria	Proteobacteria	Gammaproteobacteria	Enterobacterales	Enterobacteriaceae	Escherichia	Escherichia flexneri
PE09.bin.60	clu_183	137	4756917	53321	18130	288531	50.7	382.07	99.44	1.08	94.04	Bacteria	Proteobacteria	Gammaproteobacteria	Enterobacterales	Enterobacteriaceae	Escherichia	Escherichia flexneri
CN17.bin.15	clu_183	138	4458295	56008	14514	131875	50.84	17.62	98.48	0.57	95.63	Bacteria	Proteobacteria	Gammaproteobacteria	Enterobacterales	Enterobacteriaceae	Escherichia	Escherichia flexneri
CN01.bin.21	clu_183	474	3787321	10597	3877	50193	51.61	10.2	90.61	0.89	86.16	Bacteria	Proteobacteria	Gammaproteobacteria	Enterobacterales	Enterobacteriaceae	Escherichia	Escherichia flexneri
PE23.bin.27	clu_183	151	4332314	47313	14806	164155	51.26	67.42	92.67	0.73	89.02	Bacteria	Proteobacteria	Gammaproteobacteria	Enterobacterales	Enterobacteriaceae	Escherichia	Escherichia flexneri
PE33.bin.43	clu_183	303	4461497	23080	6680	98598	51.23	16.3	97.17	0.82	93.07	Bacteria	Proteobacteria	Gammaproteobacteria	Enterobacterales	Enterobacteriaceae	Escherichia	Escherichia coli
PE30.bin.67	clu_183	94	4431364	68872	26086	185614	50.89	22.97	98.12	0.68	94.72	Bacteria	Proteobacteria	Gammaproteobacteria	Enterobacterales	Enterobacteriaceae	Escherichia	Escherichia coli
PE04.bin.32	clu_183	300	4331150	21863	6363	81196	50.96	97.52	92.6	3.48	75.2	Bacteria	Proteobacteria	Gammaproteobacteria	Enterobacterales	Enterobacteriaceae	Escherichia	Escherichia flexneri
PE12.bin.52	clu_183	454	3564130	10224	3770	37083	51.94	11.01	85.46	0.59	82.51	Bacteria	Proteobacteria	Gammaproteobacteria	Enterobacterales	Enterobacteriaceae	Escherichia	Escherichia flexneri
CN30.bin.8	clu_183	554	3571623	7768	3316	29873	51.41	9.68	86.44	1.52	78.84	Bacteria	Proteobacteria	Gammaproteobacteria	Enterobacterales	Enterobacteriaceae	Escherichia	Escherichia flexneri
PE20.bin.6	clu_183	380	4627105	17029	5772	96536	50.64	1391.12	95.11	3.71	76.56	Bacteria	Proteobacteria	Gammaproteobacteria	Enterobacterales	Enterobacteriaceae	Escherichia	Escherichia coli
CN04.bin.16	clu_183	289	4243618	21581	7113	94660	51.17	628.32	95.02	3.44	77.82	Bacteria	Proteobacteria	Gammaproteobacteria	Enterobacterales	Enterobacteriaceae	Escherichia	Escherichia coli
PE10.bin.18	clu_183	337	4578829	19465	6517	70219	50.95	585.12	93.53	3.75	74.78	Bacteria	Proteobacteria	Gammaproteobacteria	Enterobacterales	Enterobacteriaceae	Escherichia	Escherichia coli
CN15.bin.46	clu_183	503	2797931	6113	3258	30598	51.23	13.22	73.16	2.24	61.96	Bacteria	Proteobacteria	Gammaproteobacteria	Enterobacterales	Enterobacteriaceae	Escherichia	Escherichia coli
PE11.bin.15	clu_183	524	3633990	9271	3202	34197	51.33	18.23	80.43	2.62	67.33	Bacteria	Proteobacteria	Gammaproteobacteria	Enterobacterales	Enterobacteriaceae	Escherichia	Escherichia flexneri
CN34.bin.48	clu_183	639	3262419	5848	2857	28711	51.46	8.99	81.01	4.6	58.01	Bacteria	Proteobacteria	Gammaproteobacteria	Enterobacterales	Enterobacteriaceae	Escherichia	Escherichia coli
PE18.bin.21	clu_183	234	4433549	37876	7754	180022	50.87	13.48	95.46	2.44	83.26	Bacteria	Proteobacteria	Gammaproteobacteria	Enterobacterales	Enterobacteriaceae	Escherichia	Escherichia coli
PE16.bin.23	clu_183	590	3747023	7679	3293	31904	52.13	11.21	86.54	0.68	83.14	Bacteria	Proteobacteria	Gammaproteobacteria	Enterobacterales	Enterobacteriaceae	Escherichia	Escherichia coli
CN16.bin.3	clu_184	104	4312563	69832	22039	245948	56.13	22.73	88.69	0.95	83.94	Bacteria	Proteobacteria	Gammaproteobacteria	Enterobacterales	Enterobacteriaceae	Enterobacter	Enterobacter roggenkampii
PE18.bin.1	clu_184	454	4075951	13809	3755	125771	56.9	10.11	87.75	4.08	67.35	Bacteria	Proteobacteria	Gammaproteobacteria	Enterobacterales	Enterobacteriaceae	Enterobacter	Enterobacter roggenkampii
CN16.bin.46	clu_185	223	4699285	35914	9666	135896	52.03	80.4	94.4	0.82	90.3	Bacteria	Proteobacteria	Gammaproteobacteria	Enterobacterales	Enterobacteriaceae	Citrobacter	Citrobacter portucalensis
PE20.bin.31	clu_186	91	4908281	119297	24817	353117	51.59	24.1	92.8	0.92	88.2	Bacteria	Proteobacteria	Gammaproteobacteria	Enterobacterales	Enterobacteriaceae	Citrobacter	Citrobacter freundii
PE09.bin.64	clu_187	75	2263033	52528	13617	115487	49.48	37.03	97.16	1.42	90.06	Bacteria	Firmicutes	Clostridia	Peptostreptococcales	Anaerovoracaceae	UBA1191	Unknown
CN02.bin.51	clu_187	112	2254837	29910	10984	109767	49.52	11.51	97.16	1.06	91.86	Bacteria	Firmicutes	Clostridia	Peptostreptococcales	Anaerovoracaceae	UBA1191	Unknown
CN17.bin.72	clu_188	253	1646040	8200	3368	32060	48.61	9.44	80.6	2.39	68.65	Bacteria	Firmicutes	Clostridia	Peptostreptococcales	Anaerovoracaceae	UBA1191	Unknown
PE22.bin.29	clu_188	282	1471997	6064	2854	25556	48.99	9.24	80.61	1.42	73.51	Bacteria	Firmicutes	Clostridia	Peptostreptococcales	Anaerovoracaceae	UBA1191	Unknown
PE19.bin.29	clu_188	203	1997828	13110	4773	66513	47.91	15.19	92.84	2.15	82.09	Bacteria	Firmicutes	Clostridia	Peptostreptococcales	Anaerovoracaceae	UBA1191	Unknown
CN31.bin.79	clu_188	62	2011403	45419	20988	114611	47.55	13.47	90.78	0.12	90.18	Bacteria	Firmicutes	Clostridia	Peptostreptococcales	Anaerovoracaceae	UBA1191	Unknown
CN31.bin.62	clu_189	47	2184899	57496	28570	142919	48.51	14.73	96.76	0.71	93.21	Bacteria	Firmicutes	Clostridia	Peptostreptococcales	Anaerovoracaceae	UBA1191	Unknown
PE34.bin.20	clu_190	7	2192843	454608	103558	1059877	39.48	27.09	98.23	0.71	94.68	Bacteria	Firmicutes	Clostridia	Peptostreptococcales	Anaerovoracaceae	UBA1191	Unknown
PE29.bin.49	clu_191	273	1654300	6918	3255	26500	50.6	8.76	81.08	0	81.08	Bacteria	Firmicutes	Clostridia	Peptostreptococcales	Anaerovoracaceae	Unknown	Unknown
CN11.bin.76	clu_192	228	1843666	11006	3573	93631	58.48	9.27	89.17	0.12	88.57	Bacteria	Proteobacteria	Gammaproteobacteria	Burkholderiales	Burkholderiaceae	Mesosutterella	Mesosutterella multiformis
CN09.bin.13	clu_193	244	1569811	7373	3401	37218	52.8	11.71	74.83	0.22	73.73	Bacteria	Firmicutes	Clostridia	Oscillospirales	Ruminococcaceae	Ruminococcus	Ruminococcus callidus
PE09.bin.94	clu_193	221	1778015	11403	3807	33347	52.56	11.88	79.6	0	79.6	Bacteria	Firmicutes	Clostridia	Oscillospirales	Ruminococcaceae	Ruminococcus	Ruminococcus callidus
PE36.bin.67	clu_193	170	1884928	15660	5634	51249	52.53	15.77	82.56	0	82.56	Bacteria	Firmicutes	Clostridia	Oscillospirales	Ruminococcaceae	Ruminococcus	Ruminococcus callidus
PE26.bin.77	clu_194	250	1746249	8194	3772	55280	53.59	9.38	77.67	1.34	70.97	Bacteria	Firmicutes	Clostridia	Oscillospirales	Ruminococcaceae	Ruminococcus	Unknown
CN17.bin.51	clu_195	27	1305817	59957	22632	153477	40.74	40.51	72.41	0	72.41	Bacteria	Firmicutes	Clostridia	Peptostreptococcales	Anaerovoracaceae	Eubacterium	Unknown
CN16.bin.16	clu_195	31	1385198	73178	21083	191997	40.52	27.35	94.33	0	94.33	Bacteria	Firmicutes	Clostridia	Peptostreptococcales	Anaerovoracaceae	Eubacterium	Unknown
CN17.bin.111	clu_196	9	1812125	312985	133416	521777	45.73	62.14	73.05	0	73.05	Bacteria	Firmicutes	Clostridia	Peptostreptococcales	Anaerovoracaceae	CAG-145	Unknown
CN21.bin.9	clu_197	70	1743363	37026	12754	109702	49.98	155.63	87.66	0	87.66	Bacteria	Firmicutes	Negativicutes	Veillonellales	Dialisteraceae	Dialister	Dialister succinatiphilus
CN24.bin.2	clu_198	22	4559225	278415	106398	996703	56.06	21.76	95.22	0	95.22	Bacteria	Proteobacteria	Alphaproteobacteria	Rhizobiales	Rhizobiaceae	Ochrobactrum	Ochrobactrum anthropi
CN37.bin.72	clu_199	20	1690584	161215	43166	308002	45.26	20.05	96.41	0	96.41	Bacteria	Firmicutes	Negativicutes	Veillonellales	Megasphaeraceae	Anaeroglobus	Anaeroglobus micronuciformis
CN15.bin.61	clu_199	11	1675327	287108	63020	717096	45.42	81.78	100	0	100	Bacteria	Firmicutes	Negativicutes	Veillonellales	Megasphaeraceae	Anaeroglobus	Anaeroglobus micronuciformis
CN04.bin.25	clu_200	109	2688199	37403	13633	108919	45.2	11.47	92.46	1.87	83.11	Bacteria	Firmicutes	Negativicutes	Veillonellales	Megasphaeraceae	Megasphaera	Unknown
CN23.bin.24	clu_201	69	2024245	43057	14916	147341	54.72	25.97	95.21	0	95.21	Bacteria	Firmicutes	Negativicutes	Veillonellales	Megasphaeraceae	Megasphaera	Unknown
CN28.bin.25	clu_202	23	2686158	134454	59033	405531	55.57	133.4	97.96	0	97.96	Bacteria	Verrucomicrobia	Verrucomicrobiae	Verrucomicrobiales	Akkermansiaceae	Akkermansia	Akkermansia muciniphila
CN24.bin.6	clu_202	22	2702580	169308	69845	384606	55.6	95.48	97.96	0	97.96	Bacteria	Verrucomicrobia	Verrucomicrobiae	Verrucomicrobiales	Akkermansiaceae	Akkermansia	Akkermansia muciniphila
PE40.bin.41	clu_202	19	2696452	305335	84191	379133	55.43	77.66	97.96	0	97.96	Bacteria	Verrucomicrobia	Verrucomicrobiae	Verrucomicrobiales	Akkermansiaceae	Akkermansia	Akkermansia muciniphila
CN12.bin.48	clu_202	21	2691490	189201	75759	378935	55.47	1040	97.96	0	97.96	Bacteria	Verrucomicrobia	Verrucomicrobiae	Verrucomicrobiales	Akkermansiaceae	Akkermansia	Akkermansia muciniphila
PE29.bin.86	clu_202	24	2779074	249217	63581	470773	55.54	266.82	97.28	0	97.28	Bacteria	Verrucomicrobia	Verrucomicrobiae	Verrucomicrobiales	Akkermansiaceae	Akkermansia	Akkermansia muciniphila
CN11.bin.51	clu_202	17	2622784	198184	87576	365553	55.53	53.61	97.28	0	97.28	Bacteria	Verrucomicrobia	Verrucomicrobiae	Verrucomicrobiales	Akkermansiaceae	Akkermansia	Akkermansia muciniphila
CN29.bin.6	clu_203	13	2870704	398872	107756	632890	58.38	305.95	97.96	0	97.96	Bacteria	Verrucomicrobia	Verrucomicrobiae	Verrucomicrobiales	Akkermansiaceae	Akkermansia	Akkermansia muciniphila
PE25.bin.30	clu_203	50	2716220	75273	30549	190569	58.75	15.73	95.92	0	95.92	Bacteria	Verrucomicrobia	Verrucomicrobiae	Verrucomicrobiales	Akkermansiaceae	Akkermansia	Akkermansia muciniphila
CN06.bin.61	clu_204	29	3142644	206132	54070	403837	58.03	242.64	97.96	0	97.96	Bacteria	Verrucomicrobia	Verrucomicrobiae	Verrucomicrobiales	Akkermansiaceae	Akkermansia	Akkermansia muciniphila
PE38.bin.12	clu_204	18	3009985	271163	65168	600395	58.09	124.76	97.28	0	97.28	Bacteria	Verrucomicrobia	Verrucomicrobiae	Verrucomicrobiales	Akkermansiaceae	Akkermansia	Akkermansia muciniphila
CN17.bin.1	clu_204	30	3040832	195034	67988	278859	57.89	426.5	97.96	0.68	94.56	Bacteria	Verrucomicrobia	Verrucomicrobiae	Verrucomicrobiales	Akkermansiaceae	Akkermansia	Akkermansia muciniphila
PE02.bin.38	clu_204	428	1893478	5013	2516	17964	59.65	7.93	73.76	0	73.76	Bacteria	Verrucomicrobia	Verrucomicrobiae	Verrucomicrobiales	Akkermansiaceae	Akkermansia	Akkermansia muciniphila
PE20.bin.24	clu_204	25	2906984	175853	65280	375315	57.85	114.84	89.75	1.36	82.95	Bacteria	Verrucomicrobia	Verrucomicrobiae	Verrucomicrobiales	Akkermansiaceae	Akkermansia	Akkermansia muciniphila
CN12.bin.24	clu_205	411	1760237	4760	2451	16856	53.45	7.99	71.75	1.57	63.9	Bacteria	Firmicutes	Clostridia	Oscillospirales	Acutalibacteraceae	UBA1691	Unknown
PE36.bin.28	clu_205	255	2352729	12834	4273	44278	53.01	11.26	91.95	1.34	85.25	Bacteria	Firmicutes	Clostridia	Oscillospirales	Acutalibacteraceae	UBA1691	Unknown
CN08.bin.8	clu_205	118	2580296	30749	11910	114265	52.48	23.6	92.95	1.51	85.4	Bacteria	Firmicutes	Clostridia	Oscillospirales	Acutalibacteraceae	UBA1691	Unknown
CN34.bin.107	clu_205	35	2851880	149011	34346	492945	51.79	42.17	96.64	1.34	89.94	Bacteria	Firmicutes	Clostridia	Oscillospirales	Acutalibacteraceae	UBA1691	Unknown
PE19.bin.2	clu_206	16	1423813	123643	45387	302253	45.56	112.41	74.16	0	74.16	Bacteria	Firmicutes	Clostridia	Oscillospirales	Acutalibacteraceae	CAG-180	Unknown
PE06.bin.32	clu_206	68	1411826	28683	10194	103367	45.6	20.45	76.17	0.11	75.62	Bacteria	Firmicutes	Clostridia	Oscillospirales	Acutalibacteraceae	CAG-180	Unknown
CN05.bin.51	clu_207	303	1525690	6025	2593	19300	52.32	8.78	71.25	0	71.25	Bacteria	Firmicutes	Clostridia	Oscillospirales	Acutalibacteraceae	CAG-177	Unknown
CN32.bin.23	clu_207	90	1816933	30076	10216	166615	52.3	16.6	85.36	0	85.36	Bacteria	Firmicutes	Clostridia	Oscillospirales	Acutalibacteraceae	CAG-177	Unknown
PE09.bin.21	clu_207	25	2256450	172562	43492	375248	51.27	113.07	97.27	2.01	87.22	Bacteria	Firmicutes	Clostridia	Oscillospirales	Acutalibacteraceae	CAG-177	Unknown
CN29.bin.103	clu_208	18	2307743	239349	48806	392153	51.79	170.97	97.27	0	97.27	Bacteria	Firmicutes	Clostridia	Oscillospirales	Acutalibacteraceae	CAG-177	Unknown
CN24.bin.26	clu_209	833	6401063	10103	3568	103726	61.9	9.05	88.19	4.44	65.99	Bacteria	Proteobacteria	Alphaproteobacteria	Rhizobiales	Xanthobacteraceae	Tardiphaga	Unknown
CN24.bin.31	clu_210	297	6384092	36914	9640	168243	62.23	11.1	95.82	3.56	78.02	Bacteria	Proteobacteria	Alphaproteobacteria	Rhizobiales	Rhizobiaceae	Mesorhizobium	Unknown
PE22.bin.30	clu_211	322	1565077	5411	2571	28202	62.94	11.44	77.56	3.33	60.91	Bacteria	Actinobacteria	Actinomycetia	Actinomycetales	Micrococcaceae	Rothia	Rothia mucilaginosa
PE16.bin.8	clu_211	230	1816124	10262	3830	61004	62.84	11.53	88.72	2.58	75.82	Bacteria	Actinobacteria	Actinomycetia	Actinomycetales	Micrococcaceae	Rothia	Rothia mucilaginosa
CN13.bin.34	clu_211	168	1826316	15132	5086	50725	62.82	21.08	75.86	0	75.86	Bacteria	Actinobacteria	Actinomycetia	Actinomycetales	Micrococcaceae	Rothia	Rothia mucilaginosa
CN17.bin.77	clu_212	329	1626168	5481	2713	21977	60.63	10.49	72.5	2.83	58.35	Bacteria	Actinobacteria	Actinomycetia	Actinomycetales	Micrococcaceae	Rothia	Rothia mucilaginosa
PE17.bin.31	clu_212	216	1757219	10556	3854	51643	60.85	12.38	89.1	1.67	80.75	Bacteria	Actinobacteria	Actinomycetia	Actinomycetales	Micrococcaceae	Rothia	Rothia mucilaginosa
PE11.bin.26	clu_213	78	2470802	46715	15671	198582	66.97	141.79	99.76	2.74	86.06	Bacteria	Actinobacteria	Actinomycetia	Actinomycetales	Actinomycetaceae	Pauljensenia	Unknown
PE19.bin.16	clu_213	150	2418092	23409	7898	64326	66.91	18.54	96.47	1.77	87.62	Bacteria	Actinobacteria	Actinomycetia	Actinomycetales	Actinomycetaceae	Pauljensenia	Unknown
PE17.bin.57	clu_213	196	2178435	16724	5078	84482	67.16	19.38	75	1.72	66.4	Bacteria	Actinobacteria	Actinomycetia	Actinomycetales	Actinomycetaceae	Pauljensenia	Unknown
PE30.bin.32	clu_214	229	2190331	13139	4597	45554	64.24	31.66	90.8	4.83	66.65	Bacteria	Actinobacteria	Actinomycetia	Actinomycetales	Actinomycetaceae	Pauljensenia	Pauljensenia bouchesdurhonensis
PE10.bin.42	clu_215	270	1955672	9293	3536	53404	65.81	17.67	83.65	2.71	70.1	Bacteria	Actinobacteria	Actinomycetia	Actinomycetales	Actinomycetaceae	Pauljensenia	Unknown
PE32.bin.20	clu_216	298	2187864	9086	3855	45446	65.31	9.89	94.24	4.42	72.14	Bacteria	Actinobacteria	Actinomycetia	Actinomycetales	Actinomycetaceae	Pauljensenia	Unknown
PE11.bin.37	clu_217	179	2102720	17266	5643	62550	65.19	16.49	93.03	2.68	79.63	Bacteria	Actinobacteria	Actinomycetia	Actinomycetales	Actinomycetaceae	Pauljensenia	Unknown
CN12.bin.42	clu_218	211	2369260	15203	4759	74342	67.61	12	95.97	1.37	89.12	Bacteria	Actinobacteria	Coriobacteriia	Coriobacteriales	Atopobiaceae	Olsenella	Unknown
PE27.bin.59	clu_219	289	1784636	7991	3039	30399	68.63	9.04	89.66	1.08	84.26	Bacteria	Actinobacteria	Coriobacteriia	Coriobacteriales	Atopobiaceae	Olsenella	Unknown
PE30.bin.46	clu_220	18	1712197	165781	44656	255253	65.63	44.75	97.58	0	97.58	Bacteria	Actinobacteria	Coriobacteriia	Coriobacteriales	Atopobiaceae	Olsenella	Unknown
PE21.bin.10	clu_221	22	2255247	134353	58171	643431	62.55	40.6	95.97	0	95.97	Bacteria	Actinobacteria	Coriobacteriia	Coriobacteriales	Atopobiaceae	Olsenella	Unknown
CN04.bin.1	clu_221	38	2313038	101496	30692	235555	62.63	17.98	99.19	0	99.19	Bacteria	Actinobacteria	Coriobacteriia	Coriobacteriales	Atopobiaceae	Olsenella	Unknown
CN13.bin.30	clu_222	206	2048586	14148	4753	67753	66.67	11.59	93.19	2.97	78.34	Bacteria	Actinobacteria	Coriobacteriia	Coriobacteriales	Atopobiaceae	Olsenella	Unknown
PE02.bin.59	clu_223	16	2108865	163173	64186	272545	59.76	221.3	100	1.61	91.95	Bacteria	Actinobacteria	Coriobacteriia	Coriobacteriales	Coriobacteriaceae	Collinsella	Unknown
CN34.bin.27	clu_223	19	2093946	172655	49910	368709	59.59	83.81	100	1.61	91.95	Bacteria	Actinobacteria	Coriobacteriia	Coriobacteriales	Coriobacteriaceae	Collinsella	Unknown
PE12.bin.53	clu_223	26	2033063	105788	39582	253945	59.64	79.81	99.19	1.61	91.14	Bacteria	Actinobacteria	Coriobacteriia	Coriobacteriales	Coriobacteriaceae	Collinsella	Unknown
CN09.bin.11	clu_223	54	2047901	104268	23405	385525	60.1	116.1	89.25	3.23	73.1	Bacteria	Actinobacteria	Coriobacteriia	Coriobacteriales	Coriobacteriaceae	Collinsella	Unknown
CN32.bin.41	clu_223	86	1902206	51056	8374	115117	60.06	145.99	93.55	1.37	86.7	Bacteria	Actinobacteria	Coriobacteriia	Coriobacteriales	Coriobacteriaceae	Collinsella	Unknown
PE04.bin.4	clu_224	59	2081546	61961	17557	185618	60.25	47.74	94.44	0.81	90.39	Bacteria	Actinobacteria	Coriobacteriia	Coriobacteriales	Coriobacteriaceae	Collinsella	Unknown
CN05.bin.17	clu_224	42	2165983	105818	29825	214814	60.04	166.01	99.19	0.81	95.14	Bacteria	Actinobacteria	Coriobacteriia	Coriobacteriales	Coriobacteriaceae	Collinsella	Unknown
CN29.bin.71	clu_224	150	2050832	20092	6258	40857	60.18	118.15	91.6	1.61	83.55	Bacteria	Actinobacteria	Coriobacteriia	Coriobacteriales	Coriobacteriaceae	Collinsella	Unknown
PE01.bin.30	clu_225	47	1920040	83873	20573	222956	59.97	295.24	87.9	0.81	83.85	Bacteria	Actinobacteria	Coriobacteriia	Coriobacteriales	Coriobacteriaceae	Collinsella	Unknown
PE36.bin.17	clu_225	34	1948582	103997	34222	142111	60.09	308.4	79.84	0.81	75.79	Bacteria	Actinobacteria	Coriobacteriia	Coriobacteriales	Coriobacteriaceae	Collinsella	Unknown
CN27.bin.65	clu_225	46	1973979	80940	21588	132803	59.98	20.6	89.52	0.81	85.47	Bacteria	Actinobacteria	Coriobacteriia	Coriobacteriales	Coriobacteriaceae	Collinsella	Unknown
PE33.bin.31	clu_225	40	1993300	64126	24670	164320	59.65	213.91	96.77	0.81	92.72	Bacteria	Actinobacteria	Coriobacteriia	Coriobacteriales	Coriobacteriaceae	Collinsella	Unknown
PE14.bin.11	clu_225	103	1920894	30087	8104	90449	60.14	300.64	88.71	1.61	80.66	Bacteria	Actinobacteria	Coriobacteriia	Coriobacteriales	Coriobacteriaceae	Collinsella	Unknown
PE19.bin.1	clu_225	258	1926188	9529	3650	53801	60.41	246.66	88.31	1.61	80.26	Bacteria	Actinobacteria	Coriobacteriia	Coriobacteriales	Coriobacteriaceae	Collinsella	Unknown
PE29.bin.73	clu_225	88	2181404	39408	13182	140863	60.14	170.12	95.97	0.81	91.92	Bacteria	Actinobacteria	Coriobacteriia	Coriobacteriales	Coriobacteriaceae	Collinsella	Unknown
CN12.bin.1	clu_225	18	2150091	195832	78437	269708	59.81	194.11	95.97	1.61	87.92	Bacteria	Actinobacteria	Coriobacteriia	Coriobacteriales	Coriobacteriaceae	Collinsella	Unknown
CN17.bin.76	clu_225	33	2230940	100269	39562	231444	59.92	358.94	100	0.81	95.95	Bacteria	Actinobacteria	Coriobacteriia	Coriobacteriales	Coriobacteriaceae	Collinsella	Unknown
CN35.bin.43	clu_225	122	2146419	29782	8387	85852	59.89	29.4	93.82	0.81	89.77	Bacteria	Actinobacteria	Coriobacteriia	Coriobacteriales	Coriobacteriaceae	Collinsella	Unknown
PE35.bin.60	clu_225	21	2198114	170844	52459	245939	59.67	87.09	96.77	0.81	92.72	Bacteria	Actinobacteria	Coriobacteriia	Coriobacteriales	Coriobacteriaceae	Collinsella	Unknown
PE11.bin.31	clu_225	44	2036153	55356	30664	152923	60.12	183.28	98.39	1.61	90.34	Bacteria	Actinobacteria	Coriobacteriia	Coriobacteriales	Coriobacteriaceae	Collinsella	Unknown
CN07.bin.5	clu_225	28	2095353	109320	38550	191364	59.97	65.99	100	0.81	95.95	Bacteria	Actinobacteria	Coriobacteriia	Coriobacteriales	Coriobacteriaceae	Collinsella	Unknown
CN33.bin.16	clu_225	46	2202340	68710	28785	130533	59.84	291.34	100	0.81	95.95	Bacteria	Actinobacteria	Coriobacteriia	Coriobacteriales	Coriobacteriaceae	Collinsella	Unknown
PE23.bin.67	clu_225	63	2150558	85447	15001	263735	59.92	562.21	96.57	0.81	92.52	Bacteria	Actinobacteria	Coriobacteriia	Coriobacteriales	Coriobacteriaceae	Collinsella	Unknown
PE40.bin.1	clu_225	36	2208565	99581	31305	180792	59.73	340.67	100	0.81	95.95	Bacteria	Actinobacteria	Coriobacteriia	Coriobacteriales	Coriobacteriaceae	Collinsella	Unknown
CN11.bin.63	clu_225	36	2164940	132023	30688	180320	60.07	123.15	99.19	1.61	91.14	Bacteria	Actinobacteria	Coriobacteriia	Coriobacteriales	Coriobacteriaceae	Collinsella	Unknown
PE32.bin.21	clu_225	39	2244475	74964	32145	165912	59.7	139.86	99.19	0.81	95.14	Bacteria	Actinobacteria	Coriobacteriia	Coriobacteriales	Coriobacteriaceae	Collinsella	Unknown
CN19.bin.33	clu_225	81	2119140	41811	13501	111324	60.62	26.66	98.79	0.81	94.74	Bacteria	Actinobacteria	Coriobacteriia	Coriobacteriales	Coriobacteriaceae	Collinsella	Unknown
CN06.bin.43	clu_225	29	2141943	111692	36122	263483	59.93	369.05	96.77	1.61	88.72	Bacteria	Actinobacteria	Coriobacteriia	Coriobacteriales	Coriobacteriaceae	Collinsella	Unknown
CN22.bin.18	clu_225	50	2258321	74965	21411	161191	59.81	115.27	99.19	0.81	95.14	Bacteria	Actinobacteria	Coriobacteriia	Coriobacteriales	Coriobacteriaceae	Collinsella	Unknown
CN25.bin.101	clu_225	39	2198568	100428	26206	246756	60.02	62.15	100	0.81	95.95	Bacteria	Actinobacteria	Coriobacteriia	Coriobacteriales	Coriobacteriaceae	Collinsella	Unknown
PE22.bin.22	clu_225	34	2170856	123242	31296	236117	60.2	99.33	100	0.81	95.95	Bacteria	Actinobacteria	Coriobacteriia	Coriobacteriales	Coriobacteriaceae	Collinsella	Unknown
CN36.bin.61	clu_225	67	2237070	56635	16825	111433	60.02	69.52	100	2.22	88.9	Bacteria	Actinobacteria	Coriobacteriia	Coriobacteriales	Coriobacteriaceae	Collinsella	Unknown
PE17.bin.18	clu_225	30	2186588	115572	30279	261827	59.98	251.53	91.13	4.84	66.93	Bacteria	Actinobacteria	Coriobacteriia	Coriobacteriales	Coriobacteriaceae	Collinsella	Unknown
PE15.bin.11	clu_225	188	1878345	13357	4502	87222	60.09	744.29	84.1	1.61	76.05	Bacteria	Actinobacteria	Coriobacteriia	Coriobacteriales	Coriobacteriaceae	Collinsella	Unknown
PE07.bin.75	clu_226	206	2097920	14144	4867	54450	60.24	59.26	89.49	4.7	65.99	Bacteria	Actinobacteria	Coriobacteriia	Coriobacteriales	Coriobacteriaceae	Collinsella	Unknown
PE16.bin.16	clu_227	40	2314268	75587	32172	201972	59.72	344.47	96.77	0.81	92.72	Bacteria	Actinobacteria	Coriobacteriia	Coriobacteriales	Coriobacteriaceae	Collinsella	Collinsella aerofaciens
PE09.bin.17	clu_228	17	1956299	146117	64204	242294	59.66	89.55	100	1.61	91.95	Bacteria	Actinobacteria	Coriobacteriia	Coriobacteriales	Coriobacteriaceae	Collinsella	Unknown
CN32.bin.25	clu_229	138	1623285	21024	4668	92469	58.53	13.79	75.32	0.81	71.27	Bacteria	Actinobacteria	Coriobacteriia	Coriobacteriales	Coriobacteriaceae	Collinsella	Collinsella bouchesdurhonensis
CN31.bin.71	clu_230	38	2351269	95909	30821	328764	68.92	38.57	100	0	100	Bacteria	Actinobacteria	Coriobacteriia	Coriobacteriales	Coriobacteriaceae	Collinsella	Unknown
PE34.bin.15	clu_230	183	2091666	19173	4978	100204	69.14	13.82	96.57	0	96.57	Bacteria	Actinobacteria	Coriobacteriia	Coriobacteriales	Coriobacteriaceae	Collinsella	Unknown
CN28.bin.28	clu_231	80	2165955	45015	13454	107969	62.37	21.33	96.77	2.42	84.67	Bacteria	Actinobacteria	Coriobacteriia	Coriobacteriales	Coriobacteriaceae	Enorma	Enorma massiliensis
PE30.bin.29	clu_231	76	2370143	60587	15531	173755	61.89	39.42	95.97	1.61	87.92	Bacteria	Actinobacteria	Coriobacteriia	Coriobacteriales	Coriobacteriaceae	Enorma	Enorma massiliensis
PE13.bin.33	clu_231	94	2230823	37188	12824	114070	62.13	16.77	96.24	0.81	92.19	Bacteria	Actinobacteria	Coriobacteriia	Coriobacteriales	Coriobacteriaceae	Enorma	Enorma massiliensis
CN12.bin.62	clu_231	35	2301062	144614	34408	239695	61.77	23.85	99.19	0.81	95.14	Bacteria	Actinobacteria	Coriobacteriia	Coriobacteriales	Coriobacteriaceae	Enorma	Enorma massiliensis
CN16.bin.10	clu_231	7	1972655	393811	162038	502983	61.57	110.75	90.32	0	90.32	Bacteria	Actinobacteria	Coriobacteriia	Coriobacteriales	Coriobacteriaceae	Enorma	Enorma massiliensis
CN30.bin.19	clu_231	271	1943617	9782	3384	31558	62.54	9.32	82.79	1.61	74.74	Bacteria	Actinobacteria	Coriobacteriia	Coriobacteriales	Coriobacteriaceae	Enorma	Enorma massiliensis
PE32.bin.41	clu_232	67	1710524	48152	10825	99399	62.66	184.38	97.58	0.4	95.58	Bacteria	Actinobacteria	Coriobacteriia	Coriobacteriales	Coriobacteriaceae	Collinsella	Collinsella intestinalis
CN07.bin.3	clu_232	18	1699531	168208	56885	256281	62.55	64.2	92.74	0	92.74	Bacteria	Actinobacteria	Coriobacteriia	Coriobacteriales	Coriobacteriaceae	Collinsella	Collinsella intestinalis
CN20.bin.20	clu_232	17	1808996	161669	62095	362123	62.11	30.8	98.39	0	98.39	Bacteria	Actinobacteria	Coriobacteriia	Coriobacteriales	Coriobacteriaceae	Collinsella	Collinsella intestinalis
CN08.bin.16	clu_232	20	1834167	125200	62046	268029	62.5	163.65	99.19	1.61	91.14	Bacteria	Actinobacteria	Coriobacteriia	Coriobacteriales	Coriobacteriaceae	Collinsella	Collinsella intestinalis
CN03.bin.74	clu_232	53	1845964	58209	15700	148437	62.62	14.8	97.35	1.34	90.65	Bacteria	Actinobacteria	Coriobacteriia	Coriobacteriales	Coriobacteriaceae	Collinsella	Collinsella intestinalis
PE03.bin.54	clu_232	19	1761460	201260	52355	338793	62.54	43.57	100	0	100	Bacteria	Actinobacteria	Coriobacteriia	Coriobacteriales	Coriobacteriaceae	Collinsella	Collinsella intestinalis
CN13.bin.16	clu_232	88	1783985	30853	9757	88544	62.8	16.79	97.22	0.88	92.82	Bacteria	Actinobacteria	Coriobacteriia	Coriobacteriales	Coriobacteriaceae	Collinsella	Collinsella intestinalis
PE07.bin.43	clu_233	115	2136668	30600	8334	120885	60.88	15.25	93.5	2.42	81.4	Bacteria	Actinobacteria	Coriobacteriia	Coriobacteriales	Coriobacteriaceae	Collinsella	Collinsella tanakaei
PE28.bin.33	clu_234	202	2090933	13021	5436	39292	56.41	14.46	91.28	1.01	86.23	Bacteria	Firmicutes	Clostridia	Oscillospirales	Butyricicoccaceae	AM07-15	Unknown
CN34.bin.73	clu_235	5	1541592	785743	123384	785743	45	24.08	80.65	0	80.65	Bacteria	Actinobacteria	Coriobacteriia	Coriobacteriales	Eggerthellaceae	CAG-1427	Unknown
PE06.bin.16	clu_235	54	1350338	42681	12360	105008	46.19	27.2	72.58	0.12	71.98	Bacteria	Actinobacteria	Coriobacteriia	Coriobacteriales	Eggerthellaceae	CAG-1427	Unknown
CN20.bin.8	clu_235	67	1281251	29401	8070	84065	46.19	11.76	77.3	0.12	76.7	Bacteria	Actinobacteria	Coriobacteriia	Coriobacteriales	Eggerthellaceae	CAG-1427	Unknown
CN01.bin.7	clu_235	21	1590993	147596	29363	333346	45.7	14.97	78.49	0.92	73.89	Bacteria	Actinobacteria	Coriobacteriia	Coriobacteriales	Eggerthellaceae	CAG-1427	Unknown
PE01.bin.34	clu_235	184	1531982	10953	3889	45866	45.54	10.4	89.12	0.12	88.52	Bacteria	Actinobacteria	Coriobacteriia	Coriobacteriales	Eggerthellaceae	CAG-1427	Unknown
PE35.bin.78	clu_235	85	1177290	21221	5897	47565	46.01	11.28	73.39	0	73.39	Bacteria	Actinobacteria	Coriobacteriia	Coriobacteriales	Eggerthellaceae	CAG-1427	Unknown
PE04.bin.8	clu_236	16	1523094	136076	35844	532060	53.78	14.87	70.97	0.2	69.97	Bacteria	Actinobacteria	Coriobacteriia	Coriobacteriales	Eggerthellaceae	CAG-1427	Unknown
PE10.bin.17	clu_237	23	1922069	114454	51426	203002	60.37	169.66	99.56	0	99.56	Bacteria	Actinobacteria	Actinomycetia	Actinomycetales	Bifidobacteriaceae	Bifidobacterium	Bifidobacterium animalis
PE36.bin.10	clu_237	35	1906930	90040	33983	183545	60.48	93.8	99.56	0	99.56	Bacteria	Actinobacteria	Actinomycetia	Actinomycetales	Bifidobacteriaceae	Bifidobacterium	Bifidobacterium animalis
PE27.bin.45	clu_237	121	1831817	20366	6597	98450	60.71	11.77	97.4	0.15	96.65	Bacteria	Actinobacteria	Actinomycetia	Actinomycetales	Bifidobacteriaceae	Bifidobacterium	Bifidobacterium animalis
PE11.bin.28	clu_237	54	1888755	48344	16877	136793	60.54	15.12	98.22	1	93.22	Bacteria	Actinobacteria	Actinomycetia	Actinomycetales	Bifidobacteriaceae	Bifidobacterium	Bifidobacterium animalis
CN28.bin.3	clu_237	193	1376259	8751	3416	48635	61.65	10.44	74	0.12	73.4	Bacteria	Actinobacteria	Actinomycetia	Actinomycetales	Bifidobacteriaceae	Bifidobacterium	Bifidobacterium animalis
CN26.bin.34	clu_238	293	1724805	7330	3034	34124	64.01	9.25	85.76	2.11	75.21	Bacteria	Actinobacteria	Actinomycetia	Actinomycetales	Bifidobacteriaceae	Bifidobacterium	Bifidobacterium globosum
PE31.bin.14	clu_239	14	2435661	219847	81754	640795	58.56	400.08	98.75	0.45	96.5	Bacteria	Actinobacteria	Actinomycetia	Actinomycetales	Bifidobacteriaceae	Bifidobacterium	Bifidobacterium dentium
PE34.bin.44	clu_239	95	2348235	35946	11759	159504	58.57	13	96.37	1.29	89.92	Bacteria	Actinobacteria	Actinomycetia	Actinomycetales	Bifidobacteriaceae	Bifidobacterium	Bifidobacterium dentium
CN02.bin.41	clu_239	152	2100856	22990	5952	100123	59.08	11.45	93.3	1.62	85.2	Bacteria	Actinobacteria	Actinomycetia	Actinomycetales	Bifidobacteriaceae	Bifidobacterium	Bifidobacterium dentium
CN37.bin.14	clu_239	23	2423513	184850	49831	356484	58.6	99.15	95.82	0.45	93.57	Bacteria	Actinobacteria	Actinomycetia	Actinomycetales	Bifidobacteriaceae	Bifidobacterium	Bifidobacterium dentium
PE24.bin.28	clu_239	133	2272510	26940	7615	107771	58.92	12.26	96.38	0.57	93.53	Bacteria	Actinobacteria	Actinomycetia	Actinomycetales	Bifidobacteriaceae	Bifidobacterium	Bifidobacterium dentium
PE15.bin.17	clu_239	34	2193185	107255	34606	174666	58.72	27.81	84.23	0.45	81.98	Bacteria	Actinobacteria	Actinomycetia	Actinomycetales	Bifidobacteriaceae	Bifidobacterium	Bifidobacterium dentium
PE40.bin.19	clu_240	20	2101929	189331	58478	390224	56.19	1390.76	98.64	0.23	97.49	Bacteria	Actinobacteria	Actinomycetia	Actinomycetales	Bifidobacteriaceae	Bifidobacterium	Bifidobacterium pseudocatenulatum
PE08.bin.1	clu_240	28	1620850	97197	23207	189434	57.06	146.82	71.77	0.45	69.52	Bacteria	Actinobacteria	Actinomycetia	Actinomycetales	Bifidobacteriaceae	Bifidobacterium	Bifidobacterium pseudocatenulatum
CN16.bin.26	clu_240	9	1775371	379576	107825	616980	56.57	421.17	87.95	0.09	87.5	Bacteria	Actinobacteria	Actinomycetia	Actinomycetales	Bifidobacteriaceae	Bifidobacterium	Bifidobacterium pseudocatenulatum
CN17.bin.45	clu_240	19	1654176	165281	33642	347482	56.71	148.72	72.27	1.59	64.32	Bacteria	Actinobacteria	Actinomycetia	Actinomycetales	Bifidobacteriaceae	Bifidobacterium	Bifidobacterium pseudocatenulatum
CN36.bin.52	clu_240	77	1834392	38591	10634	160030	56.69	13.67	94.22	0.45	91.97	Bacteria	Actinobacteria	Actinomycetia	Actinomycetales	Bifidobacteriaceae	Bifidobacterium	Bifidobacterium pseudocatenulatum
PE36.bin.71	clu_240	16	1970567	256220	50478	454202	56.31	187.4	94.55	0	94.55	Bacteria	Actinobacteria	Actinomycetia	Actinomycetales	Bifidobacteriaceae	Bifidobacterium	Bifidobacterium pseudocatenulatum
PE01.bin.18	clu_240	67	1473741	34742	10498	96998	56.84	407.01	74.89	0	74.89	Bacteria	Actinobacteria	Actinomycetia	Actinomycetales	Bifidobacteriaceae	Bifidobacterium	Bifidobacterium pseudocatenulatum
CN15.bin.11	clu_240	16	2024715	220386	94960	371873	56.65	449.65	97.27	0.23	96.12	Bacteria	Actinobacteria	Actinomycetia	Actinomycetales	Bifidobacteriaceae	Bifidobacterium	Bifidobacterium pseudocatenulatum
PE03.bin.18	clu_240	13	2151465	405990	97397	717223	56.35	112.19	99.55	0.23	98.4	Bacteria	Actinobacteria	Actinomycetia	Actinomycetales	Bifidobacteriaceae	Bifidobacterium	Bifidobacterium pseudocatenulatum
CN04.bin.17	clu_240	116	1478618	18766	5670	89434	56.78	450.45	74.8	1.29	68.35	Bacteria	Actinobacteria	Actinomycetia	Actinomycetales	Bifidobacteriaceae	Bifidobacterium	Bifidobacterium pseudocatenulatum
CN31.bin.23	clu_240	27	1887443	185132	27549	472265	56.58	386.31	90.8	0.68	87.4	Bacteria	Actinobacteria	Actinomycetia	Actinomycetales	Bifidobacteriaceae	Bifidobacterium	Bifidobacterium pseudocatenulatum
CN27.bin.29	clu_240	23	2123996	154495	61809	403426	56.45	20.86	98.98	0.06	98.68	Bacteria	Actinobacteria	Actinomycetia	Actinomycetales	Bifidobacteriaceae	Bifidobacterium	Bifidobacterium pseudocatenulatum
PE14.bin.5	clu_240	14	2163890	346216	79343	534714	56.74	3985.8	99.2	0.23	98.05	Bacteria	Actinobacteria	Actinomycetia	Actinomycetales	Bifidobacteriaceae	Bifidobacterium	Bifidobacterium pseudocatenulatum
PE20.bin.1	clu_240	7	1872402	540712	108606	616441	56.38	180.05	91.59	0.45	89.34	Bacteria	Actinobacteria	Actinomycetia	Actinomycetales	Bifidobacteriaceae	Bifidobacterium	Bifidobacterium pseudocatenulatum
CN23.bin.1	clu_240	18	2103374	161946	61155	272415	56.43	816.07	98.86	0.38	96.96	Bacteria	Actinobacteria	Actinomycetia	Actinomycetales	Bifidobacteriaceae	Bifidobacterium	Bifidobacterium pseudocatenulatum
PE21.bin.5	clu_240	41	1463321	67820	15435	181000	56.25	54.38	72.58	0.23	71.43	Bacteria	Actinobacteria	Actinomycetia	Actinomycetales	Bifidobacteriaceae	Bifidobacterium	Bifidobacterium pseudocatenulatum
PE13.bin.19	clu_240	78	1820646	48541	9512	134315	56.54	567.61	87.18	2.27	75.83	Bacteria	Actinobacteria	Actinomycetia	Actinomycetales	Bifidobacteriaceae	Bifidobacterium	Bifidobacterium pseudocatenulatum
PE15.bin.4	clu_240	15	1908184	304974	46375	347976	56.56	1328.2	91.82	0	91.82	Bacteria	Actinobacteria	Actinomycetia	Actinomycetales	Bifidobacteriaceae	Bifidobacterium	Bifidobacterium pseudocatenulatum
PE37.bin.1	clu_241	15	1871621	419075	59300	562782	59.33	1188.2	97.27	0.08	96.87	Bacteria	Actinobacteria	Actinomycetia	Actinomycetales	Bifidobacteriaceae	Bifidobacterium	Bifidobacterium adolescentis
PE21.bin.13	clu_241	62	1151815	34243	8373	131862	60.3	852.27	71.16	0.53	68.51	Bacteria	Actinobacteria	Actinomycetia	Actinomycetales	Bifidobacteriaceae	Bifidobacterium	Bifidobacterium adolescentis
PE04.bin.21	clu_241	56	2053402	74124	16152	184836	59.63	14.5	98.14	0.15	97.39	Bacteria	Actinobacteria	Actinomycetia	Actinomycetales	Bifidobacteriaceae	Bifidobacterium	Bifidobacterium adolescentis
CN33.bin.26	clu_241	16	1996628	160721	65480	602356	59.58	43.96	96.97	0.45	94.72	Bacteria	Actinobacteria	Actinomycetia	Actinomycetales	Bifidobacteriaceae	Bifidobacterium	Bifidobacterium adolescentis
CN10.bin.11	clu_241	27	1830313	121047	31755	210698	59.56	376.97	91.44	0.91	86.89	Bacteria	Actinobacteria	Actinomycetia	Actinomycetales	Bifidobacteriaceae	Bifidobacterium	Bifidobacterium adolescentis
PE12.bin.42	clu_241	30	1323200	67397	30858	226715	59.86	169.79	75.09	2.27	63.74	Bacteria	Actinobacteria	Actinomycetia	Actinomycetales	Bifidobacteriaceae	Bifidobacterium	Bifidobacterium adolescentis
CN05.bin.26	clu_241	42	1935425	76831	25750	277975	59.74	102.75	89.96	2.73	76.31	Bacteria	Actinobacteria	Actinomycetia	Actinomycetales	Bifidobacteriaceae	Bifidobacterium	Bifidobacterium adolescentis
PE17.bin.82	clu_241	221	1406991	8258	2893	52209	60.84	11.21	71.17	1.86	61.87	Bacteria	Actinobacteria	Actinomycetia	Actinomycetales	Bifidobacteriaceae	Bifidobacterium	Bifidobacterium adolescentis
CN04.bin.32	clu_241	37	1648974	73180	19610	251726	59.84	139.94	86.42	0.91	81.87	Bacteria	Actinobacteria	Actinomycetia	Actinomycetales	Bifidobacteriaceae	Bifidobacterium	Bifidobacterium adolescentis
PE02.bin.54	clu_242	32	2087790	110194	36657	322443	62.81	151.77	92.17	0.46	89.87	Bacteria	Actinobacteria	Actinomycetia	Actinomycetales	Bifidobacteriaceae	Bifidobacterium	Bifidobacterium bifidum
PE21.bin.17	clu_242	22	1969764	138812	46594	413073	63.08	512.44	94.47	0.46	92.17	Bacteria	Actinobacteria	Actinomycetia	Actinomycetales	Bifidobacteriaceae	Bifidobacterium	Bifidobacterium bifidum
CN31.bin.4	clu_242	29	1935211	98234	35340	240153	62.99	340.05	91.71	2.3	80.21	Bacteria	Actinobacteria	Actinomycetia	Actinomycetales	Bifidobacteriaceae	Bifidobacterium	Bifidobacterium bifidum
PE17.bin.16	clu_242	51	1935653	52684	18034	237050	63.29	25.32	94.35	0.46	92.05	Bacteria	Actinobacteria	Actinomycetia	Actinomycetales	Bifidobacteriaceae	Bifidobacterium	Bifidobacterium bifidum
CN15.bin.47	clu_242	29	2079803	97179	44446	294346	62.98	56.78	97.7	0	97.7	Bacteria	Actinobacteria	Actinomycetia	Actinomycetales	Bifidobacteriaceae	Bifidobacterium	Bifidobacterium bifidum
CN28.bin.59	clu_242	26	2013999	132054	39868	291536	63.07	321.94	96.08	1.04	90.88	Bacteria	Actinobacteria	Actinomycetia	Actinomycetales	Bifidobacteriaceae	Bifidobacterium	Bifidobacterium bifidum
PE32.bin.36	clu_243	212	1900572	12015	4089	54487	59.09	9.23	92.09	0.53	89.44	Bacteria	Actinobacteria	Actinomycetia	Actinomycetales	Bifidobacteriaceae	Bifidobacterium	Bifidobacterium breve
CN23.bin.17	clu_243	37	2223426	85443	24895	231914	58.91	2310.95	99.54	0.46	97.24	Bacteria	Actinobacteria	Actinomycetia	Actinomycetales	Bifidobacteriaceae	Bifidobacterium	Bifidobacterium breve
PE20.bin.15	clu_243	117	2071424	25391	8825	92482	58.81	18.7	92.52	1.24	86.32	Bacteria	Actinobacteria	Actinomycetia	Actinomycetales	Bifidobacteriaceae	Bifidobacterium	Bifidobacterium breve
CN36.bin.107	clu_244	15	2063287	211835	58484	491318	60.03	27.13	91.71	0.23	90.56	Bacteria	Actinobacteria	Actinomycetia	Actinomycetales	Bifidobacteriaceae	Bifidobacterium	Bifidobacterium longum
PE37.bin.2	clu_244	23	2305131	167080	52331	259195	60.26	792.95	99.54	0.08	99.14	Bacteria	Actinobacteria	Actinomycetia	Actinomycetales	Bifidobacteriaceae	Bifidobacterium	Bifidobacterium longum
CN04.bin.13	clu_244	19	2076217	150274	64318	372933	60.13	87.67	94.47	0.08	94.07	Bacteria	Actinobacteria	Actinomycetia	Actinomycetales	Bifidobacteriaceae	Bifidobacterium	Bifidobacterium longum
PE03.bin.11	clu_244	35	2166620	102544	32173	227123	60.06	19.39	99.54	0.12	98.94	Bacteria	Actinobacteria	Actinomycetia	Actinomycetales	Bifidobacteriaceae	Bifidobacterium	Bifidobacterium longum
CN17.bin.67	clu_244	20	2265407	187705	62178	359403	60.03	99.39	98.62	0	98.62	Bacteria	Actinobacteria	Actinomycetia	Actinomycetales	Bifidobacteriaceae	Bifidobacterium	Bifidobacterium longum
CN31.bin.26	clu_244	67	2036213	45860	16367	161858	60.25	977.09	97	0.12	96.4	Bacteria	Actinobacteria	Actinomycetia	Actinomycetales	Bifidobacteriaceae	Bifidobacterium	Bifidobacterium longum
PE14.bin.54	clu_244	13	2186623	297936	88368	710112	59.9	433.5	99.31	0	99.31	Bacteria	Actinobacteria	Actinomycetia	Actinomycetales	Bifidobacteriaceae	Bifidobacterium	Bifidobacterium longum
PE13.bin.12	clu_244	51	2275784	129371	18405	355588	60.15	211.89	96.77	0.92	92.17	Bacteria	Actinobacteria	Actinomycetia	Actinomycetales	Bifidobacteriaceae	Bifidobacterium	Bifidobacterium longum
CN27.bin.12	clu_244	48	2181627	76308	21859	256631	60.33	21.37	98.92	0.38	97.02	Bacteria	Actinobacteria	Actinomycetia	Actinomycetales	Bifidobacteriaceae	Bifidobacterium	Bifidobacterium longum
PE29.bin.67	clu_244	21	2268868	213873	49678	479193	59.99	32.65	99.54	0	99.54	Bacteria	Actinobacteria	Actinomycetia	Actinomycetales	Bifidobacteriaceae	Bifidobacterium	Bifidobacterium longum
PE01.bin.44	clu_244	244	1699371	9162	3261	33123	60.2	9.44	78.43	1.23	72.28	Bacteria	Actinobacteria	Actinomycetia	Actinomycetales	Bifidobacteriaceae	Bifidobacterium	Bifidobacterium longum
CN28.bin.10	clu_244	35	2237625	146064	28081	321890	60.13	308.34	98.35	3.92	78.75	Bacteria	Actinobacteria	Actinomycetia	Actinomycetales	Bifidobacteriaceae	Bifidobacterium	Bifidobacterium longum
CN12.bin.32	clu_244	26	2104607	132328	39195	482305	59.93	196.29	97.64	0	97.64	Bacteria	Actinobacteria	Actinomycetia	Actinomycetales	Bifidobacteriaceae	Bifidobacterium	Bifidobacterium longum
CN14.bin.70	clu_244	35	2218201	79518	36857	261098	60.4	17.09	97.24	0.46	94.94	Bacteria	Actinobacteria	Actinomycetia	Actinomycetales	Bifidobacteriaceae	Bifidobacterium	Bifidobacterium longum
PE08.bin.73	clu_244	37	2166231	97339	26353	234718	59.98	38.79	90.78	0.46	88.48	Bacteria	Actinobacteria	Actinomycetia	Actinomycetales	Bifidobacteriaceae	Bifidobacterium	Bifidobacterium longum
CN35.bin.60	clu_244	20	2166903	193634	63365	299787	59.88	22.4	100	0	100	Bacteria	Actinobacteria	Actinomycetia	Actinomycetales	Bifidobacteriaceae	Bifidobacterium	Bifidobacterium longum
CN21.bin.13	clu_244	51	2159917	74799	22564	193623	60.35	50.93	100	0.92	95.4	Bacteria	Actinobacteria	Actinomycetia	Actinomycetales	Bifidobacteriaceae	Bifidobacterium	Bifidobacterium longum
PE11.bin.33	clu_244	18	2402556	201368	77466	444794	60.08	665.78	100	1.34	93.3	Bacteria	Actinobacteria	Actinomycetia	Actinomycetales	Bifidobacteriaceae	Bifidobacterium	Bifidobacterium longum
CN09.bin.16	clu_244	40	2262339	96034	24681	186592	59.88	119.8	99.77	0.42	97.67	Bacteria	Actinobacteria	Actinomycetia	Actinomycetales	Bifidobacteriaceae	Bifidobacterium	Bifidobacterium longum
CN30.bin.13	clu_244	22	2260971	143326	59576	437319	60.15	277.62	97.93	0	97.93	Bacteria	Actinobacteria	Actinomycetia	Actinomycetales	Bifidobacteriaceae	Bifidobacterium	Bifidobacterium longum
PE18.bin.18	clu_244	24	2239233	123598	52068	209869	60.24	118.83	98.16	0	98.16	Bacteria	Actinobacteria	Actinomycetia	Actinomycetales	Bifidobacteriaceae	Bifidobacterium	Bifidobacterium longum
PE02.bin.44	clu_244	23	2153025	178974	57183	469809	60.06	25.83	95.39	0.15	94.64	Bacteria	Actinobacteria	Actinomycetia	Actinomycetales	Bifidobacteriaceae	Bifidobacterium	Bifidobacterium longum
PE20.bin.20	clu_244	121	2014811	27290	7906	78417	60.28	72.8	93.24	2.27	81.89	Bacteria	Actinobacteria	Actinomycetia	Actinomycetales	Bifidobacteriaceae	Bifidobacterium	Bifidobacterium longum
PE19.bin.19	clu_244	31	2349859	113621	56047	381881	60.04	172.12	98.62	2.46	86.32	Bacteria	Actinobacteria	Actinomycetia	Actinomycetales	Bifidobacteriaceae	Bifidobacterium	Bifidobacterium longum
PE07.bin.84	clu_244	25	2166638	129292	44369	345428	60.2	62.89	100	0.86	95.7	Bacteria	Actinobacteria	Actinomycetia	Actinomycetales	Bifidobacteriaceae	Bifidobacterium	Bifidobacterium longum
PE09.bin.15	clu_244	16	2192027	171645	83321	363571	60.08	144.75	98.16	0	98.16	Bacteria	Actinobacteria	Actinomycetia	Actinomycetales	Bifidobacteriaceae	Bifidobacterium	Bifidobacterium longum
PE26.bin.7	clu_244	26	2165963	128008	59901	198859	59.99	49.76	98.62	0.08	98.22	Bacteria	Actinobacteria	Actinomycetia	Actinomycetales	Bifidobacteriaceae	Bifidobacterium	Bifidobacterium longum
PE31.bin.2	clu_244	7	2207244	550003	341953	601089	60.01	120.67	100	0.15	99.25	Bacteria	Actinobacteria	Actinomycetia	Actinomycetales	Bifidobacteriaceae	Bifidobacterium	Bifidobacterium longum
CN37.bin.11	clu_244	16	2070659	182815	83420	360130	59.81	196.81	94.47	0	94.47	Bacteria	Actinobacteria	Actinomycetia	Actinomycetales	Bifidobacteriaceae	Bifidobacterium	Bifidobacterium longum
PE22.bin.24	clu_244	35	2255656	101678	30608	240643	60.21	49.97	99.54	0	99.54	Bacteria	Actinobacteria	Actinomycetia	Actinomycetales	Bifidobacteriaceae	Bifidobacterium	Bifidobacterium longum
PE27.bin.11	clu_244	18	2164083	163135	68625	313441	60.04	23.69	96.77	0	96.77	Bacteria	Actinobacteria	Actinomycetia	Actinomycetales	Bifidobacteriaceae	Bifidobacterium	Bifidobacterium longum
PE12.bin.1	clu_244	52	2175291	73560	21166	220127	60.04	153.18	92.86	4.07	72.51	Bacteria	Actinobacteria	Actinomycetia	Actinomycetales	Bifidobacteriaceae	Bifidobacterium	Bifidobacterium longum
CN05.bin.6	clu_244	29	2245224	108760	49942	195316	60	156.54	95.85	1.46	88.55	Bacteria	Actinobacteria	Actinomycetia	Actinomycetales	Bifidobacteriaceae	Bifidobacterium	Bifidobacterium longum
CN23.bin.28	clu_244	113	1881955	26209	8279	99191	60.31	45.48	87.85	0.83	83.7	Bacteria	Actinobacteria	Actinomycetia	Actinomycetales	Bifidobacteriaceae	Bifidobacterium	Bifidobacterium longum
CN20.bin.4	clu_244	30	2260086	102924	31406	448610	59.69	626.35	100	0	100	Bacteria	Actinobacteria	Actinomycetia	Actinomycetales	Bifidobacteriaceae	Bifidobacterium	Bifidobacterium longum
PE35.bin.52	clu_244	16	2188415	169791	52608	437174	60.05	207.03	88.94	0.4	86.94	Bacteria	Actinobacteria	Actinomycetia	Actinomycetales	Bifidobacteriaceae	Bifidobacterium	Bifidobacterium longum
CN13.bin.4	clu_244	34	2173026	88408	39645	366272	60.04	450.27	98.08	1.08	92.68	Bacteria	Actinobacteria	Actinomycetia	Actinomycetales	Bifidobacteriaceae	Bifidobacterium	Bifidobacterium longum
PE38.bin.52	clu_244	20	2318938	284541	99888	339313	60.2	195.39	95.85	0	95.85	Bacteria	Actinobacteria	Actinomycetia	Actinomycetales	Bifidobacteriaceae	Bifidobacterium	Bifidobacterium longum
PE36.bin.14	clu_244	33	2185627	83029	32045	295879	59.97	16.77	97.39	0.55	94.64	Bacteria	Actinobacteria	Actinomycetia	Actinomycetales	Bifidobacteriaceae	Bifidobacterium	Bifidobacterium longum
PE23.bin.61	clu_244	103	2061934	34184	9257	143803	60.7	25.46	96.77	0	96.77	Bacteria	Actinobacteria	Actinomycetia	Actinomycetales	Bifidobacteriaceae	Bifidobacterium	Bifidobacterium longum
CN25.bin.75	clu_244	89	2158115	41553	10865	149814	60.23	13.05	97.57	0.61	94.52	Bacteria	Actinobacteria	Actinomycetia	Actinomycetales	Bifidobacteriaceae	Bifidobacterium	Bifidobacterium longum
CN15.bin.3	clu_244	23	2107614	141794	44981	328480	60.12	61.46	99.54	0	99.54	Bacteria	Actinobacteria	Actinomycetia	Actinomycetales	Bifidobacteriaceae	Bifidobacterium	Bifidobacterium longum
CN34.bin.18	clu_244	31	2296864	125190	42976	218695	60.22	42.41	99.08	0.15	98.33	Bacteria	Actinobacteria	Actinomycetia	Actinomycetales	Bifidobacteriaceae	Bifidobacterium	Bifidobacterium longum
CN06.bin.51	clu_244	28	2283403	146018	43550	323602	59.91	464.65	99.77	0	99.77	Bacteria	Actinobacteria	Actinomycetia	Actinomycetales	Bifidobacteriaceae	Bifidobacterium	Bifidobacterium longum
CN01.bin.32	clu_244	19	2306082	261547	37787	499140	60.42	154.3	100	0	100	Bacteria	Actinobacteria	Actinomycetia	Actinomycetales	Bifidobacteriaceae	Bifidobacterium	Bifidobacterium longum
CN22.bin.17	clu_244	73	2119508	41044	17630	103896	59.9	51.99	97.47	0.35	95.72	Bacteria	Actinobacteria	Actinomycetia	Actinomycetales	Bifidobacteriaceae	Bifidobacterium	Bifidobacterium longum
CN33.bin.38	clu_244	33	2304020	98402	36619	290469	60.21	99.77	100	2.38	88.1	Bacteria	Actinobacteria	Actinomycetia	Actinomycetales	Bifidobacteriaceae	Bifidobacterium	Bifidobacterium longum
PE25.bin.10	clu_244	16	2217132	306729	68664	447928	60.34	521.73	91.71	0	91.71	Bacteria	Actinobacteria	Actinomycetia	Actinomycetales	Bifidobacteriaceae	Bifidobacterium	Bifidobacterium longum
CN02.bin.31	clu_244	38	2286722	129207	24378	290109	60.25	241.29	99.54	0.58	96.64	Bacteria	Actinobacteria	Actinomycetia	Actinomycetales	Bifidobacteriaceae	Bifidobacterium	Bifidobacterium longum
CN08.bin.4	clu_244	83	2113697	38446	14248	100994	60.26	484.15	97.64	0.46	95.34	Bacteria	Actinobacteria	Actinomycetia	Actinomycetales	Bifidobacteriaceae	Bifidobacterium	Bifidobacterium longum
CN29.bin.20	clu_244	50	2093618	106300	18950	322033	60.1	173.42	95.62	0.46	93.32	Bacteria	Actinobacteria	Actinomycetia	Actinomycetales	Bifidobacteriaceae	Bifidobacterium	Bifidobacterium longum
CN10.bin.16	clu_244	40	2001638	69854	23828	225536	60.28	44.67	84.1	0.08	83.7	Bacteria	Actinobacteria	Actinomycetia	Actinomycetales	Bifidobacteriaceae	Bifidobacterium	Bifidobacterium longum
PE30.bin.18	clu_244	15	2176924	231136	80570	376081	60.05	1589.45	91.24	0.42	89.14	Bacteria	Actinobacteria	Actinomycetia	Actinomycetales	Bifidobacteriaceae	Bifidobacterium	Bifidobacterium longum
PE15.bin.26	clu_244	30	2098808	123251	33405	197294	59.71	148.13	82.6	0.46	80.3	Bacteria	Actinobacteria	Actinomycetia	Actinomycetales	Bifidobacteriaceae	Bifidobacterium	Bifidobacterium longum
CN07.bin.51	clu_244	157	2096774	19082	6443	73819	60.08	250.04	92.38	4.09	71.93	Bacteria	Actinobacteria	Actinomycetia	Actinomycetales	Bifidobacteriaceae	Bifidobacterium	Bifidobacterium longum
PE17.bin.10	clu_244	33	2073244	146547	27035	241474	60.23	138.76	95.39	4.72	71.79	Bacteria	Actinobacteria	Actinomycetia	Actinomycetales	Bifidobacteriaceae	Bifidobacterium	Bifidobacterium longum
CN24.bin.28	clu_244	286	1761779	7339	3105	39224	60.3	7.99	81.34	4.37	59.49	Bacteria	Actinobacteria	Actinomycetia	Actinomycetales	Bifidobacteriaceae	Bifidobacterium	Bifidobacterium longum
PE23.bin.7	clu_245	37	1525078	64008	21392	167474	54.81	92.22	96.77	0.12	96.17	Bacteria	Actinobacteria	Coriobacteriia	Coriobacteriales	Eggerthellaceae	CAG-1427	Unknown
CN12.bin.56	clu_245	23	1625026	109728	36051	349443	54.69	23.96	98.39	0.12	97.79	Bacteria	Actinobacteria	Coriobacteriia	Coriobacteriales	Eggerthellaceae	CAG-1427	Unknown
CN27.bin.36	clu_245	116	1584116	20247	6121	58861	54.98	9.8	92.68	0.19	91.73	Bacteria	Actinobacteria	Coriobacteriia	Coriobacteriales	Eggerthellaceae	CAG-1427	Unknown
PE38.bin.53	clu_246	322	3599414	17497	5040	68158	60.67	13.22	94.22	0.27	92.87	Bacteria	Actinobacteria	Coriobacteriia	Coriobacteriales	Eggerthellaceae	Raoultibacter	Raoultibacter timonensis
CN19.bin.38	clu_246	455	3325445	9863	3429	37278	61.18	11.05	93.49	0.81	89.44	Bacteria	Actinobacteria	Coriobacteriia	Coriobacteriales	Eggerthellaceae	Raoultibacter	Raoultibacter timonensis
PE36.bin.6	clu_246	445	3753908	11764	3866	65111	60.16	9.39	89.27	0.81	85.22	Bacteria	Actinobacteria	Coriobacteriia	Coriobacteriales	Eggerthellaceae	Raoultibacter	Raoultibacter timonensis
CN12.bin.19	clu_246	721	3359014	5240	2542	28272	60.17	7.63	75.2	2.42	63.1	Bacteria	Actinobacteria	Coriobacteriia	Coriobacteriales	Eggerthellaceae	Raoultibacter	Raoultibacter timonensis
PE09.bin.2	clu_246	35	4018437	217022	81963	439157	60.26	37.39	93.55	0	93.55	Bacteria	Actinobacteria	Coriobacteriia	Coriobacteriales	Eggerthellaceae	Raoultibacter	Raoultibacter timonensis
CN31.bin.39	clu_246	41	3843267	196375	59211	439972	60.13	16.57	100	0	100	Bacteria	Actinobacteria	Coriobacteriia	Coriobacteriales	Eggerthellaceae	Raoultibacter	Raoultibacter timonensis
PE27.bin.64	clu_246	385	3836191	14867	4676	76714	60.26	10.23	93.12	0.81	89.07	Bacteria	Actinobacteria	Coriobacteriia	Coriobacteriales	Eggerthellaceae	Raoultibacter	Raoultibacter timonensis
PE28.bin.30	clu_246	563	2814964	5667	2798	22215	60.86	8.09	77.87	0.15	77.12	Bacteria	Actinobacteria	Coriobacteriia	Coriobacteriales	Eggerthellaceae	Raoultibacter	Raoultibacter timonensis
CN08.bin.35	clu_246	249	3577782	23538	6374	84234	60.61	14	96.45	0.81	92.4	Bacteria	Actinobacteria	Coriobacteriia	Coriobacteriales	Eggerthellaceae	Raoultibacter	Raoultibacter timonensis
CN34.bin.97	clu_246	440	3460545	10200	3784	47307	60.45	8.35	86.71	1.21	80.66	Bacteria	Actinobacteria	Coriobacteriia	Coriobacteriales	Eggerthellaceae	Raoultibacter	Raoultibacter timonensis
CN06.bin.6	clu_246	513	2978453	7220	2808	34965	61.22	8.38	89.36	0.81	85.31	Bacteria	Actinobacteria	Coriobacteriia	Coriobacteriales	Eggerthellaceae	Raoultibacter	Raoultibacter timonensis
CN22.bin.55	clu_246	478	3019306	7536	3166	34290	60.93	13.43	87.34	0	87.34	Bacteria	Actinobacteria	Coriobacteriia	Coriobacteriales	Eggerthellaceae	Raoultibacter	Raoultibacter timonensis
CN02.bin.29	clu_247	671	3401444	5815	2803	23349	59.3	8.31	81.23	2.82	67.13	Bacteria	Actinobacteria	Coriobacteriia	Coriobacteriales	Eggerthellaceae	Raoultibacter	Raoultibacter massiliensis
PE06.bin.55	clu_247	514	3048749	7007	3129	38936	59.63	8.9	87.66	1.34	80.96	Bacteria	Actinobacteria	Coriobacteriia	Coriobacteriales	Eggerthellaceae	Raoultibacter	Raoultibacter massiliensis
PE26.bin.21	clu_248	474	3512854	10434	3464	40779	65.92	9.42	89.97	1.61	81.92	Bacteria	Actinobacteria	Coriobacteriia	Coriobacteriales	UMGS124	UMGS124	Unknown
PE23.bin.20	clu_248	317	3766214	18636	5099	64801	66	13.01	90.48	2.9	75.98	Bacteria	Actinobacteria	Coriobacteriia	Coriobacteriales	UMGS124	UMGS124	Unknown
PE06.bin.14	clu_249	631	3472141	6575	2874	26972	66.11	8.35	82.93	0.81	78.88	Bacteria	Actinobacteria	Coriobacteriia	Coriobacteriales	UMGS124	UMGS124	Unknown
CN06.bin.46	clu_250	141	3112369	31112	10750	185524	68.08	13.22	97.31	0.81	93.26	Bacteria	Actinobacteria	Coriobacteriia	Coriobacteriales	UMGS124	UMGS124	Unknown
PE17.bin.25	clu_251	183	1793562	13025	4691	58938	60.04	15.51	93.59	2.8	79.59	Bacteria	Actinobacteria	Coriobacteriia	Coriobacteriales	QAMH01	QAMH01	Unknown
CN06.bin.36	clu_251	28	1953705	99417	37331	238876	59.53	39.01	98.39	1.08	92.99	Bacteria	Actinobacteria	Coriobacteriia	Coriobacteriales	QAMH01	QAMH01	Unknown
CN17.bin.96	clu_252	34	2459152	123115	46965	204486	61.44	42.4	99.19	0	99.19	Bacteria	Actinobacteria	Coriobacteriia	Coriobacteriales	Eggerthellaceae	Senegalimassilia	Unknown
PE29.bin.1	clu_252	30	2324263	128496	43701	293441	61.28	18.28	100	0	100	Bacteria	Actinobacteria	Coriobacteriia	Coriobacteriales	Eggerthellaceae	Senegalimassilia	Unknown
PE19.bin.8	clu_253	87	2127922	47034	11286	132359	62.65	24.6	95.48	3.23	79.33	Bacteria	Actinobacteria	Coriobacteriia	Coriobacteriales	Eggerthellaceae	Senegalimassilia	Senegalimassilia anaerobia
PE01.bin.10	clu_253	25	2360750	149802	43277	258534	62.53	70.07	100	0	100	Bacteria	Actinobacteria	Coriobacteriia	Coriobacteriales	Eggerthellaceae	Senegalimassilia	Senegalimassilia anaerobia
PE04.bin.89	clu_253	274	1985131	8786	3418	44537	62.33	9.6	83.05	2.55	70.3	Bacteria	Actinobacteria	Coriobacteriia	Coriobacteriales	Eggerthellaceae	Senegalimassilia	Senegalimassilia anaerobia
PE29.bin.106	clu_254	184	2067713	15245	5493	66418	60.72	10.65	93.4	0.95	88.65	Bacteria	Actinobacteria	Coriobacteriia	Coriobacteriales	Eggerthellaceae	UMGS1773	Unknown
CN12.bin.54	clu_255	107	2647485	43101	12731	116293	60.14	12.85	99.73	1.88	90.33	Bacteria	Actinobacteria	Coriobacteriia	Coriobacteriales	Eggerthellaceae	Slackia	Slackia equolifaciens
PE07.bin.26	clu_256	184	1908715	15513	5104	53868	64.16	57.1	82.66	0	82.66	Bacteria	Actinobacteria	Coriobacteriia	Coriobacteriales	Eggerthellaceae	Adlercreutzia	Adlercreutzia equolifaciens
CN07.bin.48	clu_256	242	2237713	13351	3924	62345	64.16	76.35	93.28	3.32	76.68	Bacteria	Actinobacteria	Coriobacteriia	Coriobacteriales	Eggerthellaceae	Adlercreutzia	Adlercreutzia equolifaciens
CN28.bin.71	clu_256	135	2571369	38144	8597	134741	63.87	91.7	98.39	2.69	84.94	Bacteria	Actinobacteria	Coriobacteriia	Coriobacteriales	Eggerthellaceae	Adlercreutzia	Adlercreutzia equolifaciens
PE33.bin.42	clu_256	288	2365361	11095	3894	34767	64.3	29.89	87.5	1.61	79.45	Bacteria	Actinobacteria	Coriobacteriia	Coriobacteriales	Eggerthellaceae	Adlercreutzia	Adlercreutzia equolifaciens
CN10.bin.33	clu_256	226	2046530	13071	4099	57481	64.22	30.83	91.25	4.03	71.1	Bacteria	Actinobacteria	Coriobacteriia	Coriobacteriales	Eggerthellaceae	Adlercreutzia	Adlercreutzia equolifaciens
CN06.bin.70	clu_256	182	2523461	20408	6712	78292	63.79	186.98	97.58	2.69	84.13	Bacteria	Actinobacteria	Coriobacteriia	Coriobacteriales	Eggerthellaceae	Adlercreutzia	Adlercreutzia equolifaciens
PE17.bin.83	clu_256	166	2071726	18968	5603	67213	64.44	132.01	87.63	1.08	82.23	Bacteria	Actinobacteria	Coriobacteriia	Coriobacteriales	Eggerthellaceae	Adlercreutzia	Adlercreutzia equolifaciens
PE36.bin.64	clu_256	38	2549959	101664	33668	259516	63.56	21.69	98.39	0.81	94.34	Bacteria	Actinobacteria	Coriobacteriia	Coriobacteriales	Eggerthellaceae	Adlercreutzia	Adlercreutzia equolifaciens
PE06.bin.41	clu_256	155	2237436	25947	6735	139544	63.78	447.29	94.89	1.61	86.84	Bacteria	Actinobacteria	Coriobacteriia	Coriobacteriales	Eggerthellaceae	Adlercreutzia	Adlercreutzia equolifaciens
PE30.bin.3	clu_256	55	2512639	70870	21285	184319	64.03	46.71	96.77	0.27	95.42	Bacteria	Actinobacteria	Coriobacteriia	Coriobacteriales	Eggerthellaceae	Adlercreutzia	Adlercreutzia equolifaciens
CN08.bin.25	clu_256	200	2441717	17666	5762	88456	64.1	138.48	92.47	2.96	77.67	Bacteria	Actinobacteria	Coriobacteriia	Coriobacteriales	Eggerthellaceae	Adlercreutzia	Adlercreutzia equolifaciens
CN31.bin.37	clu_256	32	2642526	151812	49857	419434	63.23	22.92	100	0	100	Bacteria	Actinobacteria	Coriobacteriia	Coriobacteriales	Eggerthellaceae	Adlercreutzia	Adlercreutzia equolifaciens
PE01.bin.51	clu_256	34	2646569	164239	48606	339399	63.49	23.45	99.19	0	99.19	Bacteria	Actinobacteria	Coriobacteriia	Coriobacteriales	Eggerthellaceae	Adlercreutzia	Adlercreutzia equolifaciens
CN29.bin.51	clu_256	23	2256843	144338	60253	236981	63.83	27.46	92.34	0	92.34	Bacteria	Actinobacteria	Coriobacteriia	Coriobacteriales	Eggerthellaceae	Adlercreutzia	Adlercreutzia equolifaciens
PE28.bin.46	clu_256	58	2728880	72931	21344	195805	63.61	18.33	100	0	100	Bacteria	Actinobacteria	Coriobacteriia	Coriobacteriales	Eggerthellaceae	Adlercreutzia	Adlercreutzia equolifaciens
CN21.bin.73	clu_256	34	2701538	112685	45198	274797	63.4	58.93	99.19	0	99.19	Bacteria	Actinobacteria	Coriobacteriia	Coriobacteriales	Eggerthellaceae	Adlercreutzia	Adlercreutzia equolifaciens
CN05.bin.30	clu_256	65	2639474	86254	17433	208259	63.49	40	98.39	0.27	97.04	Bacteria	Actinobacteria	Coriobacteriia	Coriobacteriales	Eggerthellaceae	Adlercreutzia	Adlercreutzia equolifaciens
CN36.bin.57	clu_256	48	2640672	72913	27592	280106	63.49	26.98	100	0.2	99	Bacteria	Actinobacteria	Coriobacteriia	Coriobacteriales	Eggerthellaceae	Adlercreutzia	Adlercreutzia equolifaciens
PE35.bin.70	clu_256	310	2059906	8382	3228	32934	64.17	16	84.27	3.72	65.67	Bacteria	Actinobacteria	Coriobacteriia	Coriobacteriales	Eggerthellaceae	Adlercreutzia	Adlercreutzia equolifaciens
CN22.bin.30	clu_256	28	2756991	176151	47507	343508	63.75	70.75	93.55	0	93.55	Bacteria	Actinobacteria	Coriobacteriia	Coriobacteriales	Eggerthellaceae	Adlercreutzia	Adlercreutzia equolifaciens
PE21.bin.20	clu_256	18	2619110	283880	77715	400460	63.23	68.64	93.55	0	93.55	Bacteria	Actinobacteria	Coriobacteriia	Coriobacteriales	Eggerthellaceae	Adlercreutzia	Adlercreutzia equolifaciens
CN11.bin.94	clu_256	32	2780012	118772	50121	376279	63.19	115.48	99.19	0.56	96.39	Bacteria	Actinobacteria	Coriobacteriia	Coriobacteriales	Eggerthellaceae	Adlercreutzia	Adlercreutzia equolifaciens
PE03.bin.5	clu_256	25	2610870	159492	48623	834470	62.99	43.79	92.74	0.27	91.39	Bacteria	Actinobacteria	Coriobacteriia	Coriobacteriales	Eggerthellaceae	Adlercreutzia	Adlercreutzia equolifaciens
CN32.bin.22	clu_256	222	2624580	18504	5183	103619	63.86	11.19	94.76	2.85	80.51	Bacteria	Actinobacteria	Coriobacteriia	Coriobacteriales	Eggerthellaceae	Adlercreutzia	Adlercreutzia equolifaciens
PE37.bin.11	clu_256	182	2612673	24723	5626	112984	63.58	11.2	95.3	0.81	91.25	Bacteria	Actinobacteria	Coriobacteriia	Coriobacteriales	Eggerthellaceae	Adlercreutzia	Adlercreutzia equolifaciens
PE12.bin.20	clu_256	11	2561722	639492	140400	731957	63.69	199.47	100	0.6	97	Bacteria	Actinobacteria	Coriobacteriia	Coriobacteriales	Eggerthellaceae	Adlercreutzia	Adlercreutzia equolifaciens
CN14.bin.55	clu_256	320	2241735	8656	3563	41617	63.77	8.83	81.71	3.09	66.26	Bacteria	Actinobacteria	Coriobacteriia	Coriobacteriales	Eggerthellaceae	Adlercreutzia	Adlercreutzia equolifaciens
CN27.bin.81	clu_256	221	2379574	14246	4781	90215	63.81	20.92	92.61	1.21	86.56	Bacteria	Actinobacteria	Coriobacteriia	Coriobacteriales	Eggerthellaceae	Adlercreutzia	Adlercreutzia equolifaciens
PE07.bin.27	clu_257	53	2095216	68336	21308	150486	61.43	17.16	97.18	0	97.18	Bacteria	Actinobacteria	Coriobacteriia	Coriobacteriales	Eggerthellaceae	Unknown	Unknown
CN05.bin.25	clu_257	98	2077940	34211	10359	129342	61.58	13.48	92.34	0	92.34	Bacteria	Actinobacteria	Coriobacteriia	Coriobacteriales	Eggerthellaceae	Unknown	Unknown
CN34.bin.81	clu_258	24	2357493	191175	52522	332893	65.5	28.66	99.19	0.4	97.19	Bacteria	Actinobacteria	Coriobacteriia	Coriobacteriales	Eggerthellaceae	Unknown	Unknown
CN33.bin.23	clu_259	152	3165832	30442	10016	141488	64.6	37.13	93.15	0	93.15	Bacteria	Actinobacteria	Coriobacteriia	Coriobacteriales	Eggerthellaceae	Eggerthella	Eggerthella lenta
PE37.bin.29	clu_259	173	2871535	30148	7292	99113	64.61	40.36	88.71	1.21	82.66	Bacteria	Actinobacteria	Coriobacteriia	Coriobacteriales	Eggerthellaceae	Eggerthella	Eggerthella lenta
PE40.bin.45	clu_259	396	2884694	9765	3188	48976	64.76	9.86	94.24	0.81	90.19	Bacteria	Actinobacteria	Coriobacteriia	Coriobacteriales	Eggerthellaceae	Eggerthella	Eggerthella lenta
PE27.bin.2	clu_259	131	3009088	37921	12449	129995	64.25	123.64	94.89	1.08	89.49	Bacteria	Actinobacteria	Coriobacteriia	Coriobacteriales	Eggerthellaceae	Eggerthella	Eggerthella lenta
PE14.bin.52	clu_259	293	3062831	16181	4590	68806	64.63	13.35	97.72	4.1	77.22	Bacteria	Actinobacteria	Coriobacteriia	Coriobacteriales	Eggerthellaceae	Eggerthella	Eggerthella lenta
PE22.bin.11	clu_259	28	3331921	184337	50323	354322	64.32	56.57	96.77	0.4	94.77	Bacteria	Actinobacteria	Coriobacteriia	Coriobacteriales	Eggerthellaceae	Eggerthella	Eggerthella lenta
CN30.bin.27	clu_259	186	2579612	21678	6556	74684	64.73	55.57	86.41	0	86.41	Bacteria	Actinobacteria	Coriobacteriia	Coriobacteriales	Eggerthellaceae	Eggerthella	Eggerthella lenta
PE31.bin.15	clu_259	54	3283560	86990	37253	210983	64.24	26.59	99.19	0	99.19	Bacteria	Actinobacteria	Coriobacteriia	Coriobacteriales	Eggerthellaceae	Eggerthella	Eggerthella lenta
CN31.bin.74	clu_259	197	2748973	20541	6314	65090	64.81	53.08	91.22	0	91.22	Bacteria	Actinobacteria	Coriobacteriia	Coriobacteriales	Eggerthellaceae	Eggerthella	Eggerthella lenta
CN15.bin.45	clu_259	240	2733308	17624	5204	97981	64.5	19.41	93.55	1.34	86.85	Bacteria	Actinobacteria	Coriobacteriia	Coriobacteriales	Eggerthellaceae	Eggerthella	Eggerthella lenta
PE23.bin.3	clu_259	179	2583185	24006	6504	108793	64.84	193.52	83.06	1.69	74.61	Bacteria	Actinobacteria	Coriobacteriia	Coriobacteriales	Eggerthellaceae	Eggerthella	Eggerthella lenta
CN25.bin.41	clu_259	351	2865443	11015	3959	58949	64.76	11.81	87.77	2.15	77.02	Bacteria	Actinobacteria	Coriobacteriia	Coriobacteriales	Eggerthellaceae	Eggerthella	Eggerthella lenta
CN19.bin.43	clu_259	155	3133230	33316	9249	115580	64.53	31.55	99.19	2.42	87.09	Bacteria	Actinobacteria	Coriobacteriia	Coriobacteriales	Eggerthellaceae	Eggerthella	Eggerthella lenta
PE02.bin.45	clu_259	69	3050946	78288	23571	155684	64.45	41.74	95.79	0.75	92.04	Bacteria	Actinobacteria	Coriobacteriia	Coriobacteriales	Eggerthellaceae	Eggerthella	Eggerthella lenta
PE34.bin.4	clu_259	35	3038717	133343	53154	286964	64.39	184.21	97.58	0	97.58	Bacteria	Actinobacteria	Coriobacteriia	Coriobacteriales	Eggerthellaceae	Eggerthella	Eggerthella lenta
PE25.bin.19	clu_259	119	3077687	42549	13745	212804	64.58	15.51	98.39	1.61	90.34	Bacteria	Actinobacteria	Coriobacteriia	Coriobacteriales	Eggerthellaceae	Eggerthella	Eggerthella lenta
PE20.bin.21	clu_259	345	2914704	12426	3965	44174	64.61	10.3	94.35	0.07	94	Bacteria	Actinobacteria	Coriobacteriia	Coriobacteriales	Eggerthellaceae	Eggerthella	Eggerthella lenta
CN18.bin.9	clu_259	518	2568653	5921	2543	19507	65.19	9.77	76.99	5	51.99	Bacteria	Actinobacteria	Coriobacteriia	Coriobacteriales	Eggerthellaceae	Eggerthella	Eggerthella lenta
PE28.bin.19	clu_259	225	2987550	19738	6789	68456	64.76	15.3	97.8	1.61	89.75	Bacteria	Actinobacteria	Coriobacteriia	Coriobacteriales	Eggerthellaceae	Eggerthella	Eggerthella lenta
CN02.bin.47	clu_259	309	2797104	12233	4151	59483	64.57	17.93	90.54	1.21	84.49	Bacteria	Actinobacteria	Coriobacteriia	Coriobacteriales	Eggerthellaceae	Eggerthella	Eggerthella lenta
PE38.bin.15	clu_259	179	3028810	30277	7898	128539	64.39	164.79	95.82	4.15	75.07	Bacteria	Actinobacteria	Coriobacteriia	Coriobacteriales	Eggerthellaceae	Eggerthella	Eggerthella lenta
CN01.bin.5	clu_259	169	2879973	28963	7145	149930	64.47	118.68	90.73	3.37	73.88	Bacteria	Actinobacteria	Coriobacteriia	Coriobacteriales	Eggerthellaceae	Eggerthella	Eggerthella lenta
CN03.bin.48	clu_259	183	3077289	25365	8188	81681	64.64	17.87	95.31	0.4	93.31	Bacteria	Actinobacteria	Coriobacteriia	Coriobacteriales	Eggerthellaceae	Eggerthella	Eggerthella lenta
CN24.bin.21	clu_259	234	3042721	18009	6577	89091	64.48	15.19	95.16	2.09	84.71	Bacteria	Actinobacteria	Coriobacteriia	Coriobacteriales	Eggerthellaceae	Eggerthella	Eggerthella lenta
CN04.bin.35	clu_259	83	3003620	86506	17105	217490	64.28	20.41	96.77	0.9	92.27	Bacteria	Actinobacteria	Coriobacteriia	Coriobacteriales	Eggerthellaceae	Eggerthella	Eggerthella lenta
CN13.bin.10	clu_259	182	3016010	24619	7836	147656	64.49	20.34	97.58	2.42	85.48	Bacteria	Actinobacteria	Coriobacteriia	Coriobacteriales	Eggerthellaceae	Eggerthella	Eggerthella lenta
PE32.bin.53	clu_259	464	2808106	7298	3029	42415	64.47	8.66	87.88	1.21	81.83	Bacteria	Actinobacteria	Coriobacteriia	Coriobacteriales	Eggerthellaceae	Eggerthella	Eggerthella lenta
PE16.bin.9	clu_259	158	3182202	35984	9362	104818	64.51	26.77	95.35	3.23	79.2	Bacteria	Actinobacteria	Coriobacteriia	Coriobacteriales	Eggerthellaceae	Eggerthella	Eggerthella lenta
CN26.bin.14	clu_259	46	3127839	106681	33632	301182	64.14	23.71	96.77	0.81	92.72	Bacteria	Actinobacteria	Coriobacteriia	Coriobacteriales	Eggerthellaceae	Eggerthella	Eggerthella lenta
PE10.bin.2	clu_259	218	2958469	21466	6551	77199	64.48	30.77	98.39	0	98.39	Bacteria	Actinobacteria	Coriobacteriia	Coriobacteriales	Eggerthellaceae	Eggerthella	Eggerthella lenta
CN20.bin.28	clu_259	279	3074134	14879	5663	52060	64.49	12.27	96.77	0.97	91.92	Bacteria	Actinobacteria	Coriobacteriia	Coriobacteriales	Eggerthellaceae	Eggerthella	Eggerthella lenta
CN35.bin.16	clu_259	64	3291653	73689	30889	290863	64.06	17.37	100	0.81	95.95	Bacteria	Actinobacteria	Coriobacteriia	Coriobacteriales	Eggerthellaceae	Eggerthella	Eggerthella lenta
CN22.bin.43	clu_259	256	2948865	17198	5593	51188	64.9	19.45	93.58	1.61	85.53	Bacteria	Actinobacteria	Coriobacteriia	Coriobacteriales	Eggerthellaceae	Eggerthella	Eggerthella lenta
PE38.bin.67	clu_260	90	3018836	77255	22054	284368	66.8	39.37	86.95	2.42	74.85	Bacteria	Actinobacteria	Coriobacteriia	Coriobacteriales	Eggerthellaceae	Gordonibacter	Gordonibacter pamelaeae
PE06.bin.38	clu_260	83	3307023	79056	16683	222777	66.49	48.63	96.39	2.42	84.29	Bacteria	Actinobacteria	Coriobacteriia	Coriobacteriales	Eggerthellaceae	Gordonibacter	Gordonibacter pamelaeae
PE16.bin.27	clu_260	218	3110350	25368	6043	94071	67.15	14.06	94.21	2.42	82.11	Bacteria	Actinobacteria	Coriobacteriia	Coriobacteriales	Eggerthellaceae	Gordonibacter	Gordonibacter pamelaeae
PE02.bin.3	clu_260	428	2903484	8483	3233	84483	67.1	11.26	85.76	0.27	84.41	Bacteria	Actinobacteria	Coriobacteriia	Coriobacteriales	Eggerthellaceae	Gordonibacter	Gordonibacter pamelaeae
CN31.bin.55	clu_260	383	2959514	9683	3778	52886	66.71	9.18	82.02	1.59	74.07	Bacteria	Actinobacteria	Coriobacteriia	Coriobacteriales	Eggerthellaceae	Gordonibacter	Gordonibacter pamelaeae
CN06.bin.12	clu_260	71	2647649	62635	19138	160506	67.27	19.15	80.61	1.69	72.16	Bacteria	Actinobacteria	Coriobacteriia	Coriobacteriales	Eggerthellaceae	Gordonibacter	Gordonibacter pamelaeae
CN30.bin.2	clu_260	123	3287646	40230	14451	196565	66.63	15.82	99.85	1.01	94.8	Bacteria	Actinobacteria	Coriobacteriia	Coriobacteriales	Eggerthellaceae	Gordonibacter	Gordonibacter pamelaeae
CN01.bin.24	clu_261	100	3793665	62158	20316	163432	65.25	22.95	97.58	3.03	82.43	Bacteria	Actinobacteria	Coriobacteriia	Coriobacteriales	Eggerthellaceae	Gordonibacter	Gordonibacter massiliensis
PE09.bin.12	clu_261	59	3862193	102600	32397	198912	65.35	47.17	97.43	1.81	88.38	Bacteria	Actinobacteria	Coriobacteriia	Coriobacteriales	Eggerthellaceae	Gordonibacter	Gordonibacter massiliensis
CN28.bin.34	clu_262	114	3552757	52158	14489	153348	65.96	20.5	95.56	1.61	87.51	Bacteria	Actinobacteria	Coriobacteriia	Coriobacteriales	Eggerthellaceae	Gordonibacter	Unknown
PE27.bin.5	clu_263	48	2107637	88001	19582	258740	64.87	16.51	96.03	0.95	91.28	Bacteria	Actinobacteria	Coriobacteriia	Coriobacteriales	Eggerthellaceae	Unknown	Unknown
CN27.bin.91	clu_263	25	1944957	132125	38896	295748	64.84	16.51	95.16	0	95.16	Bacteria	Actinobacteria	Coriobacteriia	Coriobacteriales	Eggerthellaceae	Unknown	Unknown
CN11.bin.72	clu_264	34	2334785	101000	35065	405154	65.5	32.79	99.19	2.69	85.74	Bacteria	Actinobacteria	Coriobacteriia	Coriobacteriales	Eggerthellaceae	UMGS1293	Unknown
CN29.bin.4	clu_264	56	2238570	69707	20862	159005	65.28	15.93	100	0	100	Bacteria	Actinobacteria	Coriobacteriia	Coriobacteriales	Eggerthellaceae	UMGS1293	Unknown
PE07.bin.1	clu_264	17	2101669	176759	79524	519251	65.57	72.82	99.19	0	99.19	Bacteria	Actinobacteria	Coriobacteriia	Coriobacteriales	Eggerthellaceae	UMGS1293	Unknown
PE35.bin.45	clu_264	66	2175052	46114	21808	191212	65.63	18.06	98.39	1.01	93.34	Bacteria	Actinobacteria	Coriobacteriia	Coriobacteriales	Eggerthellaceae	UMGS1293	Unknown
PE08.bin.37	clu_264	261	1992856	10268	3715	42088	65.92	10.33	89.95	1.61	81.9	Bacteria	Actinobacteria	Coriobacteriia	Coriobacteriales	Eggerthellaceae	UMGS1293	Unknown
CN17.bin.49	clu_264	249	2063166	11291	4021	27965	66.16	10.74	88.73	2.18	77.83	Bacteria	Actinobacteria	Coriobacteriia	Coriobacteriales	Eggerthellaceae	UMGS1293	Unknown
PE26.bin.10	clu_264	35	2157206	84546	38920	294758	65.54	20.4	94.35	0.27	93	Bacteria	Actinobacteria	Coriobacteriia	Coriobacteriales	Eggerthellaceae	UMGS1293	Unknown
CN11.bin.100	clu_265	197	2737460	21654	6192	98369	65.27	10.63	97.31	2.02	87.21	Bacteria	Actinobacteria	Coriobacteriia	Coriobacteriales	Eggerthellaceae	D16-34	Unknown
CN12.bin.26	clu_266	106	2070309	37863	8420	137625	57.66	30.57	100	0.27	98.65	Bacteria	Actinobacteria	Coriobacteriia	Coriobacteriales	Eggerthellaceae	Slackia	Slackia piriformis
PE14.bin.48	clu_266	18	1970681	149791	70124	199436	57.36	27.68	99.19	0	99.19	Bacteria	Actinobacteria	Coriobacteriia	Coriobacteriales	Eggerthellaceae	Slackia	Slackia piriformis
PE18.bin.11	clu_266	51	2000275	69887	17915	131105	57.57	13.09	97.18	0	97.18	Bacteria	Actinobacteria	Coriobacteriia	Coriobacteriales	Eggerthellaceae	Slackia	Slackia piriformis
CN26.bin.27	clu_266	81	2010963	39135	13734	142939	57.41	12.79	94.35	0	94.35	Bacteria	Actinobacteria	Coriobacteriia	Coriobacteriales	Eggerthellaceae	Slackia	Slackia piriformis
CN14.bin.68	clu_267	22	1744305	142660	38792	525420	61.97	18.09	88.71	0	88.71	Bacteria	Actinobacteria	Coriobacteriia	Coriobacteriales	Eggerthellaceae	Slackia	Unknown
PE29.bin.87	clu_268	34	1990167	85890	32843	270441	57.52	21.41	99.73	0	99.73	Bacteria	Actinobacteria	Coriobacteriia	Coriobacteriales	Eggerthellaceae	Slackia	Slackia isoflavoniconvertens
PE31.bin.26	clu_269	137	1485977	16713	4828	62409	46.84	9.49	85.1	0.45	82.85	Bacteria	Actinobacteria	Actinomycetia	Actinomycetales	Bifidobacteriaceae	Alloscardovia	Alloscardovia omnicolens
CN08.bin.2	clu_270	69	2396728	58653	16217	150126	53.72	28.13	88.93	0	88.93	Bacteria	Firmicutes	Clostridia	Oscillospirales	Ruminococcaceae	CAG-115	Unknown
PE28.bin.51	clu_270	74	2679079	58288	18354	138890	53.36	22.49	94.63	0	94.63	Bacteria	Firmicutes	Clostridia	Oscillospirales	Ruminococcaceae	CAG-115	Unknown
PE08.bin.68	clu_270	81	2401671	47842	14082	119871	53.63	23.37	94.63	0	94.63	Bacteria	Firmicutes	Clostridia	Oscillospirales	Ruminococcaceae	CAG-115	Unknown
CN11.bin.96	clu_270	74	2466814	53384	13782	194268	53.53	21.83	96.64	0	96.64	Bacteria	Firmicutes	Clostridia	Oscillospirales	Ruminococcaceae	CAG-115	Unknown
PE35.bin.53	clu_271	307	1827057	6813	3205	23993	56.01	16.35	79.36	4.7	55.86	Bacteria	Firmicutes	Clostridia	Oscillospirales	Butyricicoccaceae	Agathobaculum	Agathobaculum butyriciproducens
PE38.bin.43	clu_271	254	1798497	9787	3340	34444	56.19	54.31	80.49	2.35	68.74	Bacteria	Firmicutes	Clostridia	Oscillospirales	Butyricicoccaceae	Agathobaculum	Agathobaculum butyriciproducens
PE14.bin.53	clu_271	235	1978718	11861	3918	39352	55.54	45.82	82.06	1.81	73.01	Bacteria	Firmicutes	Clostridia	Oscillospirales	Butyricicoccaceae	Agathobaculum	Agathobaculum butyriciproducens
CN20.bin.31	clu_271	128	2170814	26293	8003	87942	55.64	24.91	85.32	2.46	73.02	Bacteria	Firmicutes	Clostridia	Oscillospirales	Butyricicoccaceae	Agathobaculum	Agathobaculum butyriciproducens
PE26.bin.22	clu_271	292	1937821	7942	3586	27817	56.17	11.11	83.57	1.18	77.67	Bacteria	Firmicutes	Clostridia	Oscillospirales	Butyricicoccaceae	Agathobaculum	Agathobaculum butyriciproducens
PE29.bin.84	clu_271	217	1962985	12241	4331	38918	55.93	46.2	87.78	2.01	77.73	Bacteria	Firmicutes	Clostridia	Oscillospirales	Butyricicoccaceae	Agathobaculum	Agathobaculum butyriciproducens
CN32.bin.13	clu_271	244	1867012	9991	3629	44991	56.36	14.59	86.86	1.4	79.86	Bacteria	Firmicutes	Clostridia	Oscillospirales	Butyricicoccaceae	Agathobaculum	Agathobaculum butyriciproducens
PE09.bin.11	clu_271	117	2029675	27311	8078	107899	55.72	14.69	87.58	1.34	80.88	Bacteria	Firmicutes	Clostridia	Oscillospirales	Butyricicoccaceae	Agathobaculum	Agathobaculum butyriciproducens
CN08.bin.54	clu_271	238	2129780	11240	4407	39163	56.03	18.43	90.45	1.72	81.85	Bacteria	Firmicutes	Clostridia	Oscillospirales	Butyricicoccaceae	Agathobaculum	Agathobaculum butyriciproducens
CN22.bin.8	clu_271	161	2029667	18608	6303	46496	55.85	22.73	86.47	0.73	82.82	Bacteria	Firmicutes	Clostridia	Oscillospirales	Butyricicoccaceae	Agathobaculum	Agathobaculum butyriciproducens
CN16.bin.28	clu_271	112	2338665	35953	9358	120124	55.37	13.71	92.03	0.67	88.68	Bacteria	Firmicutes	Clostridia	Oscillospirales	Butyricicoccaceae	Agathobaculum	Agathobaculum butyriciproducens
PE07.bin.40	clu_271	140	2293926	26018	8342	113612	55.84	71.43	95.1	1.28	88.7	Bacteria	Firmicutes	Clostridia	Oscillospirales	Butyricicoccaceae	Agathobaculum	Agathobaculum butyriciproducens
CN27.bin.76	clu_271	193	2154000	14327	5511	52418	55.62	21.99	93.62	0.89	89.17	Bacteria	Firmicutes	Clostridia	Oscillospirales	Butyricicoccaceae	Agathobaculum	Agathobaculum butyriciproducens
CN03.bin.27	clu_271	131	2210570	23623	8140	89188	55.78	12.28	94.04	0.89	89.59	Bacteria	Firmicutes	Clostridia	Oscillospirales	Butyricicoccaceae	Agathobaculum	Agathobaculum butyriciproducens
CN25.bin.112	clu_271	111	2242604	28015	8976	121455	55.5	59.21	95.75	1.01	90.7	Bacteria	Firmicutes	Clostridia	Oscillospirales	Butyricicoccaceae	Agathobaculum	Agathobaculum butyriciproducens
PE12.bin.43	clu_271	81	2204900	49698	12999	158591	55.64	20.05	95.97	1.01	90.92	Bacteria	Firmicutes	Clostridia	Oscillospirales	Butyricicoccaceae	Agathobaculum	Agathobaculum butyriciproducens
CN05.bin.54	clu_271	71	2168599	51056	14380	182203	55.85	31.2	94.3	0.67	90.95	Bacteria	Firmicutes	Clostridia	Oscillospirales	Butyricicoccaceae	Agathobaculum	Agathobaculum butyriciproducens
PE13.bin.11	clu_271	129	2244643	22484	8031	123247	55.61	28.37	93.96	0.34	92.26	Bacteria	Firmicutes	Clostridia	Oscillospirales	Butyricicoccaceae	Agathobaculum	Agathobaculum butyriciproducens
PE32.bin.32	clu_271	56	2430211	74260	24356	249034	54.86	16.29	95.97	0.67	92.62	Bacteria	Firmicutes	Clostridia	Oscillospirales	Butyricicoccaceae	Agathobaculum	Agathobaculum butyriciproducens
CN23.bin.4	clu_271	69	2460334	55845	16620	117661	55.29	20.95	97.32	0.67	93.97	Bacteria	Firmicutes	Clostridia	Oscillospirales	Butyricicoccaceae	Agathobaculum	Agathobaculum butyriciproducens
PE02.bin.67	clu_271	62	2505907	75508	20826	210648	55.01	41.94	94.75	0	94.75	Bacteria	Firmicutes	Clostridia	Oscillospirales	Butyricicoccaceae	Agathobaculum	Agathobaculum butyriciproducens
PE14.bin.18	clu_272	96	1929229	34816	9701	108689	58.87	17.66	88.7	4.7	65.2	Bacteria	Firmicutes	Clostridia	Oscillospirales	Butyricicoccaceae	Agathobaculum	Unknown
PE33.bin.22	clu_272	197	1604006	11467	3548	48914	59.82	13.22	79.91	2.35	68.16	Bacteria	Firmicutes	Clostridia	Oscillospirales	Butyricicoccaceae	Agathobaculum	Unknown
PE37.bin.14	clu_272	20	1507639	126519	33476	274413	58.78	88.87	72.48	0.67	69.13	Bacteria	Firmicutes	Clostridia	Oscillospirales	Butyricicoccaceae	Agathobaculum	Unknown
PE17.bin.61	clu_272	66	1614287	36552	13721	73688	59.42	63.4	81.74	0.67	78.39	Bacteria	Firmicutes	Clostridia	Oscillospirales	Butyricicoccaceae	Agathobaculum	Unknown
PE29.bin.70	clu_272	128	1844319	22658	6284	66527	58.97	15.01	90.02	2.01	79.97	Bacteria	Firmicutes	Clostridia	Oscillospirales	Butyricicoccaceae	Agathobaculum	Unknown
PE25.bin.21	clu_272	235	1628907	8003	3558	32633	59.55	9.62	86.58	1.01	81.53	Bacteria	Firmicutes	Clostridia	Oscillospirales	Butyricicoccaceae	Agathobaculum	Unknown
PE01.bin.40	clu_272	114	1963190	29042	8704	76986	58.58	14.85	92.39	2.01	82.34	Bacteria	Firmicutes	Clostridia	Oscillospirales	Butyricicoccaceae	Agathobaculum	Unknown
CN21.bin.12	clu_273	72	1610357	27833	11518	105012	59.18	22.63	77.35	0.34	75.65	Bacteria	Firmicutes	Clostridia	Oscillospirales	Butyricicoccaceae	Agathobaculum	Unknown
CN08.bin.55	clu_274	188	1957272	15436	4736	55239	59.62	14.84	88.45	3.45	71.2	Bacteria	Firmicutes	Clostridia	Oscillospirales	Butyricicoccaceae	Agathobaculum	Unknown
CN05.bin.8	clu_275	94	2177995	31993	10929	91608	55.58	24.59	77.03	1.53	69.38	Bacteria	Firmicutes	Peptococcia	Peptococcales	Peptococcaceae	UMGS1590	Unknown
PE06.bin.69	clu_275	30	2603010	110389	55683	224778	54.38	339.73	79.7	2.04	69.5	Bacteria	Firmicutes	Peptococcia	Peptococcales	Peptococcaceae	UMGS1590	Unknown
CN21.bin.19	clu_275	91	2127034	31664	11320	90315	55.37	15.91	76.11	1.14	70.41	Bacteria	Firmicutes	Peptococcia	Peptococcales	Peptococcaceae	UMGS1590	Unknown
PE04.bin.85	clu_275	118	2284007	25288	9576	98155	55.3	11.63	76.62	1.02	71.52	Bacteria	Firmicutes	Peptococcia	Peptococcales	Peptococcaceae	UMGS1590	Unknown
PE07.bin.88	clu_275	61	2321510	55728	18306	132116	55.22	60.54	79.95	1.53	72.3	Bacteria	Firmicutes	Peptococcia	Peptococcales	Peptococcaceae	UMGS1590	Unknown
PE18.bin.30	clu_276	73	2450489	62976	17924	138850	47.25	17.18	91.76	2.32	80.16	Bacteria	Firmicutes	Clostridia	Lachnospirales	Lachnospiraceae	CAG-45	Unknown
PE38.bin.41	clu_277	88	1489296	25176	7063	136321	53.42	19.71	70.92	0	70.92	Bacteria	Firmicutes	Clostridia	Oscillospirales	Acutalibacteraceae	Clostridium	Clostridium leptum
CN29.bin.10	clu_277	128	2217472	40712	6500	180966	51.81	12.23	91.61	0.56	88.81	Bacteria	Firmicutes	Clostridia	Oscillospirales	Acutalibacteraceae	Clostridium	Clostridium leptum
CN05.bin.61	clu_277	90	1831727	33277	8761	78258	51.3	24.45	74.27	1.01	69.22	Bacteria	Firmicutes	Clostridia	Oscillospirales	Acutalibacteraceae	Clostridium	Clostridium leptum
PE30.bin.22	clu_277	232	1657424	9589	3216	67058	53.21	16.09	81.06	1.48	73.66	Bacteria	Firmicutes	Clostridia	Oscillospirales	Acutalibacteraceae	Clostridium	Clostridium leptum
PE29.bin.78	clu_277	251	1801373	9604	3514	43857	52.45	9.31	79.9	0	79.9	Bacteria	Firmicutes	Clostridia	Oscillospirales	Acutalibacteraceae	Clostridium	Clostridium leptum
CN34.bin.108	clu_277	278	2815511	14253	4539	71156	50.47	9.2	94.65	0.67	91.3	Bacteria	Firmicutes	Clostridia	Oscillospirales	Acutalibacteraceae	Clostridium	Clostridium leptum
PE21.bin.2	clu_277	218	1816161	11008	3631	48478	52.7	10.8	85.37	0.13	84.72	Bacteria	Firmicutes	Clostridia	Oscillospirales	Acutalibacteraceae	Clostridium	Clostridium leptum
CN02.bin.24	clu_277	198	2530268	18300	5722	70603	51.19	10.83	95.97	1.51	88.42	Bacteria	Firmicutes	Clostridia	Oscillospirales	Acutalibacteraceae	Clostridium	Clostridium leptum
CN09.bin.22	clu_278	239	2144740	11982	4252	54322	62.32	11.14	92.28	0.89	87.83	Bacteria	Firmicutes	Clostridia	Oscillospirales	Acutalibacteraceae	Acutalibacter	Unknown
CN26.bin.7	clu_278	35	2411268	124790	33972	237275	61.16	18.23	98.66	0	98.66	Bacteria	Firmicutes	Clostridia	Oscillospirales	Acutalibacteraceae	Acutalibacter	Unknown
CN12.bin.7	clu_279	40	2511183	91608	40737	199781	59.57	29.14	95.97	0	95.97	Bacteria	Firmicutes	Clostridia	Oscillospirales	Acutalibacteraceae	Acutalibacter	Unknown
CN21.bin.66	clu_280	7	1453454	320875	166007	363225	53.13	40.69	71.81	0	71.81	Bacteria	Firmicutes	Clostridia	Oscillospirales	Acutalibacteraceae	CAG-217	Unknown
CN18.bin.5	clu_280	63	1857222	44054	15249	91801	54.02	81.35	94.97	0.67	91.62	Bacteria	Firmicutes	Clostridia	Oscillospirales	Acutalibacteraceae	CAG-217	Unknown
CN20.bin.49	clu_280	91	1708347	26571	8978	104416	54.27	11.7	93.33	0	93.33	Bacteria	Firmicutes	Clostridia	Oscillospirales	Acutalibacteraceae	CAG-217	Unknown
PE13.bin.47	clu_280	10	1816390	282897	137773	341238	53.81	53.26	94.63	0	94.63	Bacteria	Firmicutes	Clostridia	Oscillospirales	Acutalibacteraceae	CAG-217	Unknown
PE08.bin.42	clu_280	5	1773219	520260	177716	716159	53.62	110.59	94.97	0	94.97	Bacteria	Firmicutes	Clostridia	Oscillospirales	Acutalibacteraceae	CAG-217	Unknown
PE23.bin.66	clu_280	13	1838550	237538	105209	706759	53.55	155.27	94.97	0	94.97	Bacteria	Firmicutes	Clostridia	Oscillospirales	Acutalibacteraceae	CAG-217	Unknown
PE29.bin.95	clu_280	17	1838632	144947	50988	296540	53.93	22.7	95.3	0	95.3	Bacteria	Firmicutes	Clostridia	Oscillospirales	Acutalibacteraceae	CAG-217	Unknown
CN11.bin.23	clu_280	13	1898523	191835	72914	348894	53.53	113.01	95.97	0	95.97	Bacteria	Firmicutes	Clostridia	Oscillospirales	Acutalibacteraceae	CAG-217	Unknown
CN29.bin.3	clu_280	8	1860331	286446	165551	485560	53.69	68.68	96.98	0	96.98	Bacteria	Firmicutes	Clostridia	Oscillospirales	Acutalibacteraceae	CAG-217	Unknown
CN30.bin.22	clu_280	12	1907734	244665	85906	338847	53.36	34.68	96.98	0	96.98	Bacteria	Firmicutes	Clostridia	Oscillospirales	Acutalibacteraceae	CAG-217	Unknown
CN06.bin.83	clu_280	9	1951047	289365	136250	558363	53.32	129.56	97.32	0	97.32	Bacteria	Firmicutes	Clostridia	Oscillospirales	Acutalibacteraceae	CAG-217	Unknown
PE38.bin.1	clu_280	12	1961990	276758	88518	740972	52.95	205.34	97.32	0	97.32	Bacteria	Firmicutes	Clostridia	Oscillospirales	Acutalibacteraceae	CAG-217	Unknown
CN19.bin.2	clu_280	15	2046047	173548	67259	312671	53.04	49.19	97.32	0	97.32	Bacteria	Firmicutes	Clostridia	Oscillospirales	Acutalibacteraceae	CAG-217	Unknown
CN01.bin.36	clu_281	14	3372609	418589	122226	493627	45.15	18.76	93.67	1.6	85.67	Bacteria	Firmicutes	Clostridia	Lachnospirales	Lachnospiraceae	Blautia	Blautia hydrogenotrophica
PE36.bin.54	clu_281	190	2995837	25618	6789	82685	45.88	11.18	90.15	2.58	77.25	Bacteria	Firmicutes	Clostridia	Lachnospirales	Lachnospiraceae	Blautia	Blautia hydrogenotrophica
CN34.bin.64	clu_282	301	2486272	10032	4568	31897	50.37	8.96	90.94	1.16	85.14	Bacteria	Firmicutes	Clostridia	Lachnospirales	Lachnospiraceae	Roseburia	Roseburia hominis
PE09.bin.23	clu_282	66	2589621	60367	18438	177556	50.4	19.05	94.88	1.81	85.83	Bacteria	Firmicutes	Clostridia	Lachnospirales	Lachnospiraceae	Roseburia	Roseburia hominis
CN08.bin.30	clu_282	201	2680813	19081	6707	86497	50.28	14.97	75.44	0	75.44	Bacteria	Firmicutes	Clostridia	Lachnospirales	Lachnospiraceae	Roseburia	Roseburia hominis
CN11.bin.80	clu_282	78	2655436	46882	17867	134565	50.31	20.76	96.11	0.48	93.71	Bacteria	Firmicutes	Clostridia	Lachnospirales	Lachnospiraceae	Roseburia	Roseburia hominis
PE12.bin.44	clu_282	375	2261331	6952	3345	31291	50.99	11.85	75.1	1.49	67.65	Bacteria	Firmicutes	Clostridia	Lachnospirales	Lachnospiraceae	Roseburia	Roseburia hominis
PE18.bin.25	clu_283	46	2882880	88923	40910	274182	41.65	79.11	99.33	0.21	98.28	Bacteria	Firmicutes	Clostridia	Lachnospirales	Lachnospiraceae	Lachnospira	Unknown
PE38.bin.40	clu_284	339	1618260	5209	2623	26180	60.04	8.65	74.01	1.7	65.51	Bacteria	Firmicutes	Clostridia	Oscillospirales	Ruminococcaceae	Ruthenibacterium	Unknown
PE30.bin.34	clu_284	295	1633053	6668	2831	20151	60.9	10.02	81.29	1.53	73.64	Bacteria	Firmicutes	Clostridia	Oscillospirales	Ruminococcaceae	Ruthenibacterium	Unknown
CN17.bin.3	clu_284	257	2019043	10139	3859	31392	59.85	10.4	90.67	1.53	83.02	Bacteria	Firmicutes	Clostridia	Oscillospirales	Ruminococcaceae	Ruthenibacterium	Unknown
PE27.bin.20	clu_284	94	2326906	41391	13729	125470	59.1	15.34	97.96	0.68	94.56	Bacteria	Firmicutes	Clostridia	Oscillospirales	Ruminococcaceae	Ruthenibacterium	Unknown
PE30.bin.27	clu_285	405	2063939	5977	2731	25850	60.87	9.96	76.24	1.76	67.44	Bacteria	Firmicutes	Clostridia	Oscillospirales	Ruminococcaceae	Ruthenibacterium	Ruthenibacterium lactatiformans
CN01.bin.15	clu_285	403	2331410	7171	2860	30587	59.98	9.75	82.36	2.27	71.01	Bacteria	Firmicutes	Clostridia	Oscillospirales	Ruminococcaceae	Ruthenibacterium	Ruthenibacterium lactatiformans
CN24.bin.35	clu_285	432	1952302	5087	2659	14376	59.94	7.61	72.07	0	72.07	Bacteria	Firmicutes	Clostridia	Oscillospirales	Ruminococcaceae	Ruthenibacterium	Ruthenibacterium lactatiformans
CN31.bin.24	clu_285	38	2243986	98223	36354	196683	59.54	346.11	72.11	0	72.11	Bacteria	Firmicutes	Clostridia	Oscillospirales	Ruminococcaceae	Ruthenibacterium	Ruthenibacterium lactatiformans
CN11.bin.41	clu_285	383	2139865	7031	2776	31980	60.57	8.51	78.55	1.22	72.45	Bacteria	Firmicutes	Clostridia	Oscillospirales	Ruminococcaceae	Ruthenibacterium	Ruthenibacterium lactatiformans
PE20.bin.16	clu_285	443	2259856	5819	2852	24445	59.69	8.14	76.05	0.57	73.2	Bacteria	Firmicutes	Clostridia	Oscillospirales	Ruminococcaceae	Ruthenibacterium	Ruthenibacterium lactatiformans
PE35.bin.55	clu_285	88	2327915	43904	12082	130757	59.71	27.3	79.59	1.13	73.94	Bacteria	Firmicutes	Clostridia	Oscillospirales	Ruminococcaceae	Ruthenibacterium	Ruthenibacterium lactatiformans
PE27.bin.28	clu_285	38	2415316	112950	32119	283423	59.33	62.7	74.15	0	74.15	Bacteria	Firmicutes	Clostridia	Oscillospirales	Ruminococcaceae	Ruthenibacterium	Ruthenibacterium lactatiformans
CN17.bin.39	clu_285	83	2348576	44177	14300	97947	59.48	81.28	76.53	0.34	74.83	Bacteria	Firmicutes	Clostridia	Oscillospirales	Ruminococcaceae	Ruthenibacterium	Ruthenibacterium lactatiformans
PE38.bin.9	clu_285	343	2177650	7924	3129	38357	60.67	13.31	76.79	0	76.79	Bacteria	Firmicutes	Clostridia	Oscillospirales	Ruminococcaceae	Ruthenibacterium	Ruthenibacterium lactatiformans
CN04.bin.10	clu_285	42	2313249	78528	29996	162479	59.45	18.94	76.87	0	76.87	Bacteria	Firmicutes	Clostridia	Oscillospirales	Ruminococcaceae	Ruthenibacterium	Ruthenibacterium lactatiformans
CN26.bin.69	clu_285	84	2368394	48883	12566	160433	59.72	47.98	80.95	0.68	77.55	Bacteria	Firmicutes	Clostridia	Oscillospirales	Ruminococcaceae	Ruthenibacterium	Ruthenibacterium lactatiformans
PE22.bin.37	clu_285	433	2276849	6168	2972	27305	59.93	8.93	83.22	0.14	82.52	Bacteria	Firmicutes	Clostridia	Oscillospirales	Ruminococcaceae	Ruthenibacterium	Ruthenibacterium lactatiformans
CN29.bin.72	clu_285	57	2840888	89921	27708	212387	58.9	23.02	83.67	0.16	82.87	Bacteria	Firmicutes	Clostridia	Oscillospirales	Ruminococcaceae	Ruthenibacterium	Ruthenibacterium lactatiformans
PE10.bin.20	clu_285	346	2666599	10034	3561	39478	59.64	10.56	84.01	0.14	83.31	Bacteria	Firmicutes	Clostridia	Oscillospirales	Ruminococcaceae	Ruthenibacterium	Ruthenibacterium lactatiformans
PE19.bin.4	clu_285	345	2631313	10069	3681	43992	59.5	11.32	92.18	1.7	83.68	Bacteria	Firmicutes	Clostridia	Oscillospirales	Ruminococcaceae	Ruthenibacterium	Ruthenibacterium lactatiformans
CN09.bin.6	clu_285	52	2564170	80747	25924	166068	59.65	37.87	85.03	0	85.03	Bacteria	Firmicutes	Clostridia	Oscillospirales	Ruminococcaceae	Ruthenibacterium	Ruthenibacterium lactatiformans
PE23.bin.60	clu_285	280	2505199	13381	4090	65555	60.28	17.38	88.72	0	88.72	Bacteria	Firmicutes	Clostridia	Oscillospirales	Ruminococcaceae	Ruthenibacterium	Ruthenibacterium lactatiformans
PE34.bin.31	clu_285	103	2861556	42957	14693	208050	59.03	14.62	92.52	0.38	90.62	Bacteria	Firmicutes	Clostridia	Oscillospirales	Ruminococcaceae	Ruthenibacterium	Ruthenibacterium lactatiformans
PE36.bin.18	clu_285	146	2807359	29166	8754	114152	59.34	16.6	95.24	0.68	91.84	Bacteria	Firmicutes	Clostridia	Oscillospirales	Ruminococcaceae	Ruthenibacterium	Ruthenibacterium lactatiformans
PE33.bin.14	clu_285	166	2753324	26081	7578	95801	59.63	15.88	92.18	0	92.18	Bacteria	Firmicutes	Clostridia	Oscillospirales	Ruminococcaceae	Ruthenibacterium	Ruthenibacterium lactatiformans
CN12.bin.41	clu_285	51	2931523	96052	30235	223665	58.52	157.15	93.2	0.16	92.4	Bacteria	Firmicutes	Clostridia	Oscillospirales	Ruminococcaceae	Ruthenibacterium	Ruthenibacterium lactatiformans
CN07.bin.13	clu_285	231	2746578	17676	5609	65082	59.58	18.43	93.2	0	93.2	Bacteria	Firmicutes	Clostridia	Oscillospirales	Ruminococcaceae	Ruthenibacterium	Ruthenibacterium lactatiformans
PE31.bin.25	clu_285	277	2963141	14485	5021	69012	59.01	10.41	96.01	0	96.01	Bacteria	Firmicutes	Clostridia	Oscillospirales	Ruminococcaceae	Ruthenibacterium	Ruthenibacterium lactatiformans
CN08.bin.11	clu_285	93	2808477	51434	13997	128568	59.22	43.64	96.6	0	96.6	Bacteria	Firmicutes	Clostridia	Oscillospirales	Ruminococcaceae	Ruthenibacterium	Ruthenibacterium lactatiformans
CN02.bin.61	clu_285	83	3072345	59435	21061	213837	58.38	18.86	97.28	0	97.28	Bacteria	Firmicutes	Clostridia	Oscillospirales	Ruminococcaceae	Ruthenibacterium	Ruthenibacterium lactatiformans
CN34.bin.29	clu_285	81	2995031	51842	22685	161335	58.85	23.08	97.28	0	97.28	Bacteria	Firmicutes	Clostridia	Oscillospirales	Ruminococcaceae	Ruthenibacterium	Ruthenibacterium lactatiformans
CN21.bin.30	clu_286	351	2712622	10981	3610	56160	40.7	9.75	94.2	0.69	90.75	Bacteria	Firmicutes	Clostridia	Lachnospirales	Lachnospiraceae	Eubacterium	Unknown
PE36.bin.87	clu_287	284	2591892	12343	4507	69010	50.62	10.98	84.07	2.37	72.22	Bacteria	Firmicutes	Clostridia	Lachnospirales	Lachnospiraceae	GCA-900066135	Unknown
PE09.bin.62	clu_288	85	3058139	55506	19797	188243	59.32	22.47	93.73	3.89	74.28	Bacteria	Firmicutes	Clostridia	Christensenellales	CAG-74	Unknown	Unknown
CN29.bin.49	clu_289	197	1691979	11179	4224	44323	62.32	17.05	88.76	3.12	73.16	Bacteria	Firmicutes	Clostridia	Oscillospirales	Oscillospiraceae	ER4	Unknown
CN18.bin.17	clu_289	346	1381253	4246	2426	13186	62.39	25.82	71.68	3.53	54.03	Bacteria	Firmicutes	Clostridia	Oscillospirales	Oscillospiraceae	ER4	Unknown
PE29.bin.15	clu_290	220	1381294	7342	3440	29290	60.47	13.33	71.15	0.34	69.45	Bacteria	Firmicutes	Clostridia	Oscillospirales	Oscillospiraceae	ER4	Unknown
CN27.bin.14	clu_290	37	2034088	109299	27360	223583	59.48	18.29	97.65	0	97.65	Bacteria	Firmicutes	Clostridia	Oscillospirales	Oscillospiraceae	ER4	Unknown
CN05.bin.75	clu_291	163	1811305	16509	5245	45246	59.31	53.87	90.44	0.17	89.59	Bacteria	Firmicutes	Clostridia	Oscillospirales	Oscillospiraceae	ER4	Unknown
PE28.bin.71	clu_291	45	2033815	63878	21352	194429	59.19	24.7	97.99	1.01	92.94	Bacteria	Firmicutes	Clostridia	Oscillospirales	Oscillospiraceae	ER4	Unknown
PE23.bin.33	clu_291	59	1867064	45177	17388	182107	59.3	23.07	90.6	0.67	87.25	Bacteria	Firmicutes	Clostridia	Oscillospirales	Oscillospiraceae	ER4	Unknown
PE07.bin.12	clu_291	67	1876185	42405	13991	133939	59.41	25.93	91.28	1.34	84.58	Bacteria	Firmicutes	Clostridia	Oscillospirales	Oscillospiraceae	ER4	Unknown
PE08.bin.79	clu_291	207	1897508	12446	4206	55587	59.38	20.91	91.28	1.68	82.88	Bacteria	Firmicutes	Clostridia	Oscillospirales	Oscillospiraceae	ER4	Unknown
PE04.bin.6	clu_291	114	1972882	23610	9263	77056	59.15	13.43	97.44	3.36	80.64	Bacteria	Firmicutes	Clostridia	Oscillospirales	Oscillospiraceae	ER4	Unknown
CN32.bin.19	clu_291	276	1732622	7777	3046	32812	59.88	13.12	85.88	4.09	65.43	Bacteria	Firmicutes	Clostridia	Oscillospirales	Oscillospiraceae	ER4	Unknown
CN17.bin.83	clu_291	307	1532895	5651	2670	26568	59.96	9.6	77.51	0.15	76.76	Bacteria	Firmicutes	Clostridia	Oscillospirales	Oscillospiraceae	ER4	Unknown
CN18.bin.4	clu_292	79	2164925	45293	13040	133556	61.06	81.84	90.6	0.3	89.1	Bacteria	Firmicutes	Clostridia	Oscillospirales	Oscillospiraceae	CAG-110	Unknown
CN29.bin.40	clu_292	62	2341471	64976	18170	162493	61.11	21.34	91.95	0	91.95	Bacteria	Firmicutes	Clostridia	Oscillospirales	Oscillospiraceae	CAG-110	Unknown
CN17.bin.54	clu_292	41	2207039	92748	22867	256195	61.15	22.82	90.6	0	90.6	Bacteria	Firmicutes	Clostridia	Oscillospirales	Oscillospiraceae	CAG-110	Unknown
CN22.bin.53	clu_292	241	1761717	9104	3934	29443	62.3	14.62	84.46	0.4	82.46	Bacteria	Firmicutes	Clostridia	Oscillospirales	Oscillospiraceae	CAG-110	Unknown
PE04.bin.18	clu_293	376	1914156	5807	2819	22157	61.95	9.94	83.78	4.02	63.68	Bacteria	Firmicutes	Clostridia	Oscillospirales	Oscillospiraceae	CAG-170	Unknown
PE29.bin.92	clu_294	271	2348126	11463	4150	31398	58.97	32.05	90.56	2.29	79.11	Bacteria	Firmicutes	Clostridia	Oscillospirales	Oscillospiraceae	CAG-170	Unknown
PE28.bin.78	clu_295	223	1690032	9263	3927	29046	60.91	12.32	85.66	1.9	76.16	Bacteria	Firmicutes	Clostridia	Oscillospirales	Oscillospiraceae	CAG-170	Unknown
PE12.bin.38	clu_296	309	1617205	6344	2758	27832	61.97	10.07	78.16	1.91	68.61	Bacteria	Firmicutes	Clostridia	Oscillospirales	Oscillospiraceae	CAG-103	Unknown
PE06.bin.20	clu_296	212	1738572	11398	3741	43395	62.54	10.56	85.44	1.04	80.24	Bacteria	Firmicutes	Clostridia	Oscillospirales	Oscillospiraceae	CAG-103	Unknown
PE35.bin.34	clu_297	128	1891368	20588	7583	65026	62.07	15.41	91.01	0.22	89.91	Bacteria	Firmicutes	Clostridia	Oscillospirales	Oscillospiraceae	CAG-103	Unknown
PE38.bin.29	clu_297	200	1672091	12384	3570	48649	62.91	13.06	85.84	2.68	72.44	Bacteria	Firmicutes	Clostridia	Oscillospirales	Oscillospiraceae	CAG-103	Unknown
CN11.bin.65	clu_298	105	1774158	28014	8292	77410	62.84	27.16	88.12	4.7	64.62	Bacteria	Firmicutes	Clostridia	Oscillospirales	Oscillospiraceae	CAG-103	Unknown
CN22.bin.22	clu_298	61	1876728	38039	16790	91711	62.35	27.23	91.17	1.81	82.12	Bacteria	Firmicutes	Clostridia	Oscillospirales	Oscillospiraceae	CAG-103	Unknown
PE29.bin.10	clu_298	95	1776460	30349	10585	95569	62.91	16.75	88.03	1.01	82.98	Bacteria	Firmicutes	Clostridia	Oscillospirales	Oscillospiraceae	CAG-103	Unknown
PE23.bin.70	clu_298	162	1705659	14314	4851	61218	63.29	13.23	88.46	0	88.46	Bacteria	Firmicutes	Clostridia	Oscillospirales	Oscillospiraceae	CAG-103	Unknown
CN29.bin.27	clu_298	33	1901713	98707	24200	331738	62.56	16.95	93.29	0.67	89.94	Bacteria	Firmicutes	Clostridia	Oscillospirales	Oscillospiraceae	CAG-103	Unknown
PE17.bin.33	clu_299	287	1612931	6603	2909	20458	63.65	9.85	79.83	0.67	76.48	Bacteria	Firmicutes	Clostridia	Oscillospirales	Oscillospiraceae	CAG-103	Unknown
PE07.bin.50	clu_299	75	1814616	39462	12976	93352	63	14.8	89.6	0.02	89.5	Bacteria	Firmicutes	Clostridia	Oscillospirales	Oscillospiraceae	CAG-103	Unknown
PE09.bin.88	clu_300	23	2246864	140646	64248	259401	59.46	54.02	79.19	2.01	69.14	Bacteria	Firmicutes	Clostridia	Oscillospirales	Oscillospiraceae	UBA738	Unknown
CN29.bin.80	clu_300	34	2064740	116275	39763	193216	60.02	26.53	85.76	0.67	82.41	Bacteria	Firmicutes	Clostridia	Oscillospirales	Oscillospiraceae	UBA738	Unknown
PE29.bin.109	clu_300	85	2369541	42125	15128	150268	59.91	16.41	89.38	0.67	86.03	Bacteria	Firmicutes	Clostridia	Oscillospirales	Oscillospiraceae	UBA738	Unknown
CN29.bin.112	clu_301	192	2333067	17211	5767	72514	56.82	11.69	88.62	2.84	74.42	Bacteria	Firmicutes	Clostridia	Oscillospirales	Oscillospiraceae	UBA1777	Unknown
CN19.bin.3	clu_302	273	1704732	7332	3256	32020	63.44	14.33	83.34	1.68	74.94	Bacteria	Firmicutes	Clostridia	Oscillospirales	Oscillospiraceae	CAG-83	Unknown
CN36.bin.37	clu_302	71	1701942	45856	10647	128521	62.33	16.12	85.23	0.73	81.58	Bacteria	Firmicutes	Clostridia	Oscillospirales	Oscillospiraceae	CAG-83	Unknown
CN10.bin.10	clu_302	145	2002308	19152	6895	78106	62.54	17.07	94.97	3.69	76.52	Bacteria	Firmicutes	Clostridia	Oscillospirales	Oscillospiraceae	CAG-83	Unknown
CN05.bin.55	clu_303	274	1533237	6421	2914	28260	63.7	10.74	76.73	0.89	72.28	Bacteria	Firmicutes	Clostridia	Oscillospirales	Oscillospiraceae	CAG-83	Unknown
CN06.bin.7	clu_304	109	1917525	28872	8135	65074	61.61	16.52	88.01	2.07	77.66	Bacteria	Firmicutes	Clostridia	Oscillospirales	Oscillospiraceae	CAG-83	Unknown
PE33.bin.67	clu_305	47	2018138	79041	25521	210967	60.36	32.01	89.04	0	89.04	Bacteria	Firmicutes	Clostridia	Oscillospirales	Oscillospiraceae	CAG-83	Unknown
PE17.bin.14	clu_305	111	1764123	29815	6303	92862	60.84	15.42	85.91	4.03	65.76	Bacteria	Firmicutes	Clostridia	Oscillospirales	Oscillospiraceae	CAG-83	Unknown
CN19.bin.17	clu_306	91	1536783	25240	8355	81380	61.83	24.78	88.12	0.67	84.77	Bacteria	Firmicutes	Clostridia	Oscillospirales	Oscillospiraceae	CAG-83	Unknown
CN34.bin.38	clu_307	35	2267153	126959	33372	261471	59.53	50.34	93.29	1.34	86.59	Bacteria	Firmicutes	Clostridia	Oscillospirales	Oscillospiraceae	CAG-83	Unknown
PE23.bin.10	clu_307	42	1975278	69169	31032	136568	60.37	32.68	92.62	0.86	88.32	Bacteria	Firmicutes	Clostridia	Oscillospirales	Oscillospiraceae	CAG-83	Unknown
CN17.bin.46	clu_307	26	1974504	156790	35601	200975	60.33	36.42	93.29	0.67	89.94	Bacteria	Firmicutes	Clostridia	Oscillospirales	Oscillospiraceae	CAG-83	Unknown
PE19.bin.36	clu_307	47	1952630	67198	17397	162549	60.33	23.53	91.95	1.01	86.9	Bacteria	Firmicutes	Clostridia	Oscillospirales	Oscillospiraceae	CAG-83	Unknown
PE35.bin.7	clu_307	160	1858785	14618	6216	52467	60.79	14.28	88.29	0.78	84.39	Bacteria	Firmicutes	Clostridia	Oscillospirales	Oscillospiraceae	CAG-83	Unknown
PE09.bin.31	clu_307	245	1607481	7834	3354	28144	61.43	9.42	85.65	4.33	64	Bacteria	Firmicutes	Clostridia	Oscillospirales	Oscillospiraceae	CAG-83	Unknown
PE26.bin.57	clu_307	288	1456015	5902	2832	20313	61.46	8.76	81.56	2.68	68.16	Bacteria	Firmicutes	Clostridia	Oscillospirales	Oscillospiraceae	CAG-83	Unknown
CN18.bin.32	clu_308	333	1543721	5370	2660	15546	62.63	32.36	71.37	1.4	64.37	Bacteria	Firmicutes	Clostridia	Oscillospirales	Oscillospiraceae	CAG-83	Unknown
PE29.bin.91	clu_308	27	1669312	82663	28729	187223	62.18	38.15	83.56	0	83.56	Bacteria	Firmicutes	Clostridia	Oscillospirales	Oscillospiraceae	CAG-83	Unknown
CN29.bin.19	clu_308	33	1745623	100187	28171	189998	61.33	304.89	78.19	0.17	77.34	Bacteria	Firmicutes	Clostridia	Oscillospirales	Oscillospiraceae	CAG-83	Unknown
CN11.bin.22	clu_308	36	2064555	100998	33216	193121	61.42	29.81	89.93	0.67	86.58	Bacteria	Firmicutes	Clostridia	Oscillospirales	Oscillospiraceae	CAG-83	Unknown
CN08.bin.15	clu_308	116	1704337	21042	7196	51628	62.98	17.05	89.43	1.68	81.03	Bacteria	Firmicutes	Clostridia	Oscillospirales	Oscillospiraceae	CAG-83	Unknown
CN32.bin.44	clu_308	157	1631065	14862	5370	57087	63.33	16.64	84.94	0.73	81.29	Bacteria	Firmicutes	Clostridia	Oscillospirales	Oscillospiraceae	CAG-83	Unknown
PE30.bin.39	clu_308	178	1615886	12701	4377	28018	63.4	12.58	87.13	2.82	73.03	Bacteria	Firmicutes	Clostridia	Oscillospirales	Oscillospiraceae	CAG-83	Unknown
PE09.bin.67	clu_309	38	1772419	81542	24223	221858	61.31	20.14	84.9	0.67	81.55	Bacteria	Firmicutes	Clostridia	Oscillospirales	Oscillospiraceae	CAG-83	Unknown
CN29.bin.32	clu_310	297	1837000	7532	2927	43938	60.17	9.96	83.19	3.41	66.14	Bacteria	Firmicutes	Clostridia	Oscillospirales	Oscillospiraceae	CAG-83	Unknown
CN09.bin.27	clu_311	134	2338489	26388	9020	86252	62.34	23.95	97.82	3.02	82.72	Bacteria	Firmicutes	Clostridia	Oscillospirales	Oscillospiraceae	Oscillibacter	Oscillibacter welbionis
CN12.bin.57	clu_311	39	2719317	116225	35778	383505	60.97	35.97	92.62	0.71	89.07	Bacteria	Firmicutes	Clostridia	Oscillospirales	Oscillospiraceae	Oscillibacter	Oscillibacter welbionis
CN26.bin.8	clu_311	34	2605067	132369	39588	386955	61.05	23.74	97.99	0	97.99	Bacteria	Firmicutes	Clostridia	Oscillospirales	Oscillospiraceae	Oscillibacter	Oscillibacter welbionis
CN06.bin.47	clu_311	119	2457535	31736	10392	95236	61.92	30.07	98.43	0.17	97.58	Bacteria	Firmicutes	Clostridia	Oscillospirales	Oscillospiraceae	Oscillibacter	Oscillibacter welbionis
PE28.bin.16	clu_311	122	2414090	25554	9788	69677	62.01	45.34	93.04	1.06	87.74	Bacteria	Firmicutes	Clostridia	Oscillospirales	Oscillospiraceae	Oscillibacter	Oscillibacter welbionis
CN17.bin.94	clu_311	30	1902580	96818	29078	384842	62.21	24.68	85.23	0	85.23	Bacteria	Firmicutes	Clostridia	Oscillospirales	Oscillospiraceae	Oscillibacter	Oscillibacter welbionis
CN34.bin.93	clu_311	119	2273005	33725	8899	83603	62.32	57.13	95.81	1.63	87.66	Bacteria	Firmicutes	Clostridia	Oscillospirales	Oscillospiraceae	Oscillibacter	Oscillibacter welbionis
CN28.bin.62	clu_311	284	2172364	9862	3744	36179	62.79	12.4	90.75	1.68	82.35	Bacteria	Firmicutes	Clostridia	Oscillospirales	Oscillospiraceae	Oscillibacter	Oscillibacter welbionis
PE02.bin.11	clu_312	240	2743242	18852	5046	102438	58.34	15.6	96.7	1.68	88.3	Bacteria	Firmicutes	Clostridia	Oscillospirales	Oscillospiraceae	Lawsonibacter	Unknown
CN34.bin.16	clu_312	24	2289592	238905	48091	523356	58.62	42.39	95.57	3.11	80.02	Bacteria	Firmicutes	Clostridia	Oscillospirales	Oscillospiraceae	Lawsonibacter	Unknown
CN34.bin.5	clu_313	159	2284922	22061	6248	81077	61.53	11.49	92.74	0	92.74	Bacteria	Firmicutes	Clostridia	Oscillospirales	Oscillospiraceae	Lawsonibacter	Unknown
CN34.bin.47	clu_314	134	2854765	32043	11794	89403	63.17	18.51	95.53	0.47	93.18	Bacteria	Firmicutes	Clostridia	Oscillospirales	Oscillospiraceae	Flavonifractor	Flavonifractor plautii
CN09.bin.20	clu_314	233	3253604	22235	5974	109625	62.85	16.57	98.43	0.18	97.53	Bacteria	Firmicutes	Clostridia	Oscillospirales	Oscillospiraceae	Flavonifractor	Flavonifractor plautii
CN26.bin.29	clu_314	104	3148764	47781	15371	202566	62.78	18.02	96.64	0.13	95.99	Bacteria	Firmicutes	Clostridia	Oscillospirales	Oscillospiraceae	Flavonifractor	Flavonifractor plautii
CN20.bin.41	clu_314	460	2364305	5809	2776	27995	63.98	8.76	78.86	2.37	67.01	Bacteria	Firmicutes	Clostridia	Oscillospirales	Oscillospiraceae	Flavonifractor	Flavonifractor plautii
CN35.bin.28	clu_314	99	3032002	46981	14300	154458	62.18	16.31	95.3	0	95.3	Bacteria	Firmicutes	Clostridia	Oscillospirales	Oscillospiraceae	Flavonifractor	Flavonifractor plautii
CN02.bin.39	clu_314	143	3162350	38929	10078	106877	62.63	16.17	95.97	0.54	93.27	Bacteria	Firmicutes	Clostridia	Oscillospirales	Oscillospiraceae	Flavonifractor	Flavonifractor plautii
CN06.bin.9	clu_314	490	2390120	5541	2634	21557	64.39	9.13	79.51	2.09	69.06	Bacteria	Firmicutes	Clostridia	Oscillospirales	Oscillospiraceae	Flavonifractor	Flavonifractor plautii
CN12.bin.9	clu_314	427	2998134	9334	3218	43221	63.05	10.4	92.09	3.32	75.49	Bacteria	Firmicutes	Clostridia	Oscillospirales	Oscillospiraceae	Flavonifractor	Flavonifractor plautii
CN25.bin.42	clu_314	326	2278261	8829	3468	41626	64.04	9.94	80.24	0.89	75.79	Bacteria	Firmicutes	Clostridia	Oscillospirales	Oscillospiraceae	Flavonifractor	Flavonifractor plautii
PE02.bin.28	clu_314	456	2494758	6643	2733	44525	63.92	11.46	82.55	3.88	63.15	Bacteria	Firmicutes	Clostridia	Oscillospirales	Oscillospiraceae	Flavonifractor	Flavonifractor plautii
PE28.bin.32	clu_315	55	2607056	90639	24979	255182	60.32	32.92	89.43	0.67	86.08	Bacteria	Firmicutes	Clostridia	Oscillospirales	Oscillospiraceae	Intestinimonas	Intestinimonas butyriciproducens
PE29.bin.26	clu_316	38	2068706	117007	29401	314756	59.32	41.5	88.59	3.36	71.79	Bacteria	Firmicutes	Clostridia	Oscillospirales	Oscillospiraceae	Evtepia	Unknown
PE07.bin.70	clu_316	48	1795836	51813	22047	104152	60.75	41.93	82.21	0.67	78.86	Bacteria	Firmicutes	Clostridia	Oscillospirales	Oscillospiraceae	Evtepia	Unknown
CN11.bin.42	clu_316	119	1694049	22198	6810	68173	61.22	13.11	76.17	0.34	74.47	Bacteria	Firmicutes	Clostridia	Oscillospirales	Oscillospiraceae	Evtepia	Unknown
PE09.bin.1	clu_316	25	2192696	189576	39603	454094	59	69.77	96.64	0.67	93.29	Bacteria	Firmicutes	Clostridia	Oscillospirales	Oscillospiraceae	Evtepia	Unknown
CN21.bin.61	clu_316	129	1804165	19580	6994	46148	60.51	13.78	82.55	0.67	79.2	Bacteria	Firmicutes	Clostridia	Oscillospirales	Oscillospiraceae	Evtepia	Unknown
PE04.bin.59	clu_316	247	1558475	7629	3097	31436	60.72	8.93	72.77	3.94	53.07	Bacteria	Firmicutes	Clostridia	Oscillospirales	Oscillospiraceae	Evtepia	Unknown
PE33.bin.64	clu_317	99	1714074	29871	7603	76375	60.88	18.19	78.86	0.67	75.51	Bacteria	Firmicutes	Clostridia	Oscillospirales	Oscillospiraceae	Evtepia	Evtepia gabavorous
CN12.bin.61	clu_317	112	2064016	31812	7284	143443	59.87	16.41	92.28	0.67	88.93	Bacteria	Firmicutes	Clostridia	Oscillospirales	Oscillospiraceae	Evtepia	Evtepia gabavorous
CN06.bin.57	clu_317	47	1702966	48241	18306	131265	60.7	44.69	77.85	0.67	74.5	Bacteria	Firmicutes	Clostridia	Oscillospirales	Oscillospiraceae	Evtepia	Evtepia gabavorous
PE21.bin.53	clu_317	39	1741071	64973	22591	139617	60.53	23.16	81.21	0.67	77.86	Bacteria	Firmicutes	Clostridia	Oscillospirales	Oscillospiraceae	Evtepia	Evtepia gabavorous
PE23.bin.74	clu_317	76	1595131	33746	9565	94587	61.15	61.44	73.15	1.34	66.45	Bacteria	Firmicutes	Clostridia	Oscillospirales	Oscillospiraceae	Evtepia	Evtepia gabavorous
CN08.bin.43	clu_317	32	1728506	75947	28750	294389	60.61	45.82	83.89	1.01	78.84	Bacteria	Firmicutes	Clostridia	Oscillospirales	Oscillospiraceae	Evtepia	Evtepia gabavorous
PE06.bin.13	clu_317	43	1579967	57178	16792	136612	60.06	34.76	73.38	0.67	70.03	Bacteria	Firmicutes	Clostridia	Oscillospirales	Oscillospiraceae	Evtepia	Evtepia gabavorous
PE35.bin.90	clu_317	75	1622984	38319	10313	82515	60.81	16.83	79.13	0.67	75.78	Bacteria	Firmicutes	Clostridia	Oscillospirales	Oscillospiraceae	Evtepia	Evtepia gabavorous
CN20.bin.24	clu_317	224	1492545	8034	3578	39482	61.43	9.27	76.89	1.68	68.49	Bacteria	Firmicutes	Clostridia	Oscillospirales	Oscillospiraceae	Evtepia	Evtepia gabavorous
PE08.bin.24	clu_317	258	1587313	7349	3143	32119	61.32	10	77.14	0.04	76.94	Bacteria	Firmicutes	Clostridia	Oscillospirales	Oscillospiraceae	Evtepia	Evtepia gabavorous
PE17.bin.60	clu_317	156	1575308	14746	4819	38810	61.66	25.14	80.98	0.67	77.63	Bacteria	Firmicutes	Clostridia	Oscillospirales	Oscillospiraceae	Evtepia	Evtepia gabavorous
CN07.bin.27	clu_317	133	1697417	17521	5930	51599	61.09	19.54	81.25	0.67	77.9	Bacteria	Firmicutes	Clostridia	Oscillospirales	Oscillospiraceae	Evtepia	Evtepia gabavorous
CN28.bin.26	clu_317	199	1569402	10315	4017	36068	61.58	14.82	79.68	0	79.68	Bacteria	Firmicutes	Clostridia	Oscillospirales	Oscillospiraceae	Evtepia	Evtepia gabavorous
CN05.bin.67	clu_317	150	1718676	16292	5236	91285	61.11	18.81	80.56	0.67	77.21	Bacteria	Firmicutes	Clostridia	Oscillospirales	Oscillospiraceae	Evtepia	Evtepia gabavorous
CN22.bin.45	clu_317	243	1320947	6624	2801	22079	61.59	13.59	71.44	1.34	64.74	Bacteria	Firmicutes	Clostridia	Oscillospirales	Oscillospiraceae	Evtepia	Evtepia gabavorous
CN03.bin.44	clu_317	113	1708020	23080	7061	68006	60.78	11.42	81.66	1.34	74.96	Bacteria	Firmicutes	Clostridia	Oscillospirales	Oscillospiraceae	Evtepia	Evtepia gabavorous
CN29.bin.28	clu_318	26	1954673	170194	38845	380197	62.37	26	94.97	1.34	88.27	Bacteria	Firmicutes	Clostridia	Oscillospirales	Oscillospiraceae	Evtepia	Unknown
PE26.bin.30	clu_318	270	1787625	8506	3191	38544	62.93	9.37	84.04	1.9	74.54	Bacteria	Firmicutes	Clostridia	Oscillospirales	Oscillospiraceae	Evtepia	Unknown
CN34.bin.76	clu_319	100	1954558	35179	8666	93513	63.26	12.67	83.78	0.67	80.43	Bacteria	Firmicutes	Clostridia	Oscillospirales	Oscillospiraceae	Evtepia	Unknown
PE27.bin.13	clu_319	34	2180729	126570	41028	379338	62.45	39.4	93.29	0.67	89.94	Bacteria	Firmicutes	Clostridia	Oscillospirales	Oscillospiraceae	Evtepia	Unknown
PE30.bin.25	clu_319	51	2100772	61621	18749	276760	62.84	55.03	90.44	0.78	86.54	Bacteria	Firmicutes	Clostridia	Oscillospirales	Oscillospiraceae	Evtepia	Unknown
CN12.bin.53	clu_320	407	2562527	7406	3177	34170	53.94	8.98	79.69	0	79.69	Bacteria	Firmicutes	Clostridia	Lachnospirales	Lachnospiraceae	CAG-81	Unknown
CN29.bin.62	clu_321	470	2460847	6037	2815	28980	62.74	8.22	85.69	3.76	66.89	Bacteria	Firmicutes	Clostridia	Christensenellales	CAG-74	UMGS1603	Unknown
PE04.bin.66	clu_322	244	1699014	8780	3216	43293	54.03	8.86	75.71	2.68	62.31	Bacteria	Firmicutes	Clostridia	Oscillospirales	Acutalibacteraceae	Ruminococcus	Unknown
CN07.bin.28	clu_322	228	1696765	9863	3554	53976	54.47	12.45	81.36	0	81.36	Bacteria	Firmicutes	Clostridia	Oscillospirales	Acutalibacteraceae	Ruminococcus	Unknown
PE17.bin.71	clu_322	32	2244237	85411	48063	185248	53.89	79.5	99.33	3.36	82.53	Bacteria	Firmicutes	Clostridia	Oscillospirales	Acutalibacteraceae	Ruminococcus	Unknown
PE33.bin.44	clu_322	50	2219551	73124	24001	183975	53.61	24.66	93.96	0	93.96	Bacteria	Firmicutes	Clostridia	Oscillospirales	Acutalibacteraceae	Ruminococcus	Unknown
CN08.bin.51	clu_322	35	2354185	96980	38690	417183	53.5	26.94	98.32	0	98.32	Bacteria	Firmicutes	Clostridia	Oscillospirales	Acutalibacteraceae	Ruminococcus	Unknown
PE29.bin.30	clu_323	337	1726192	5906	2846	19859	62.3	8.49	71.67	3.8	52.67	Bacteria	Firmicutes	Clostridia	Oscillospirales	Acutalibacteraceae	Ruminococcus	Unknown
CN12.bin.28	clu_323	23	2629260	208102	100376	361685	60.26	325.22	97.99	0.36	96.19	Bacteria	Firmicutes	Clostridia	Oscillospirales	Acutalibacteraceae	Ruminococcus	Unknown
PE30.bin.2	clu_323	119	2046706	21897	9604	124701	62.53	14.04	95.57	1.17	89.72	Bacteria	Firmicutes	Clostridia	Oscillospirales	Acutalibacteraceae	Ruminococcus	Unknown
CN31.bin.44	clu_324	72	2408234	51413	16183	125979	43.3	12.82	98.63	0.68	95.23	Bacteria	Firmicutes	Clostridia	Oscillospirales	Ruminococcaceae	Ruminococcus	Ruminococcus bicirculans
CN17.bin.24	clu_324	57	2531584	70602	21660	168122	43.33	16.9	97.95	0	97.95	Bacteria	Firmicutes	Clostridia	Oscillospirales	Ruminococcaceae	Ruminococcus	Ruminococcus bicirculans
CN08.bin.28	clu_324	51	2594022	92608	27121	174732	43.1	30.71	97.95	0	97.95	Bacteria	Firmicutes	Clostridia	Oscillospirales	Ruminococcaceae	Ruminococcus	Ruminococcus bicirculans
CN21.bin.41	clu_324	308	1771649	6797	2963	22515	43.56	8.43	70.41	0.34	68.71	Bacteria	Firmicutes	Clostridia	Oscillospirales	Ruminococcaceae	Ruminococcus	Ruminococcus bicirculans
PE19.bin.24	clu_324	151	2452579	24704	7436	92837	43.12	14.89	91.38	0.68	87.98	Bacteria	Firmicutes	Clostridia	Oscillospirales	Ruminococcaceae	Ruminococcus	Ruminococcus bicirculans
CN22.bin.34	clu_324	49	2446417	73190	25713	170820	42.99	175.36	94.52	1.03	89.37	Bacteria	Firmicutes	Clostridia	Oscillospirales	Ruminococcaceae	Ruminococcus	Ruminococcus bicirculans
CN27.bin.40	clu_324	267	2147644	9385	4095	58848	43.2	8.52	83.23	0	83.23	Bacteria	Firmicutes	Clostridia	Oscillospirales	Ruminococcaceae	Ruminococcus	Ruminococcus bicirculans
CN07.bin.11	clu_324	129	2561952	28722	10864	86330	43.12	15.95	95.65	0.82	91.55	Bacteria	Firmicutes	Clostridia	Oscillospirales	Ruminococcaceae	Ruminococcus	Ruminococcus bicirculans
PE08.bin.62	clu_325	134	1961572	21935	7238	67750	51.25	13.88	91.71	0.67	88.36	Bacteria	Firmicutes	Clostridia	Oscillospirales	Ruminococcaceae	Ruminococcus	Unknown
CN16.bin.47	clu_326	39	2833302	110408	35509	327301	48.57	22.61	97.9	0.7	94.4	Bacteria	Firmicutes	Clostridia	Christensenellales	Christensenellaceae	Catabacter	Catabacter hongkongensis
PE04.bin.36	clu_327	134	1830171	19340	6733	141175	51.96	10.75	93.15	0.81	89.1	Bacteria	Firmicutes	Clostridia	Christensenellales	QALW01	UMGS1338	Unknown
CN11.bin.53	clu_328	66	2509796	59085	21176	191391	47.38	29.08	97.99	0	97.99	Bacteria	Firmicutes	Clostridia	Oscillospirales	Ruminococcaceae	CAG-353	Unknown
CN21.bin.68	clu_329	236	1674570	8460	3627	42802	57.84	10.47	85.34	0.67	81.99	Bacteria	Firmicutes	Clostridia	Oscillospirales	Oscillospiraceae	NK3B98	Unknown
CN17.bin.38	clu_330	39	2278159	105655	30530	266761	57.84	508.95	97.62	0	97.62	Bacteria	Firmicutes	Clostridia	Oscillospirales	Ruminococcaceae	Faecalibacterium	Faecalibacterium prausnitzii
PE02.bin.9	clu_330	68	1824008	44616	15725	95729	58.83	44.24	78.27	0.85	74.02	Bacteria	Firmicutes	Clostridia	Oscillospirales	Ruminococcaceae	Faecalibacterium	Faecalibacterium prausnitzii
PE17.bin.20	clu_330	145	2118216	24774	6244	82066	58.2	38.68	83.76	1.87	74.41	Bacteria	Firmicutes	Clostridia	Oscillospirales	Ruminococcaceae	Faecalibacterium	Faecalibacterium prausnitzii
CN14.bin.60	clu_330	45	2217692	74097	24093	239047	58.48	299.89	97.18	2.27	85.83	Bacteria	Firmicutes	Clostridia	Oscillospirales	Ruminococcaceae	Faecalibacterium	Faecalibacterium prausnitzii
PE04.bin.7	clu_330	86	2049525	34209	12078	87889	58.8	37.71	90.08	1.7	81.58	Bacteria	Firmicutes	Clostridia	Oscillospirales	Ruminococcaceae	Faecalibacterium	Faecalibacterium prausnitzii
PE36.bin.36	clu_330	132	1958245	21759	7499	54793	59.08	16.18	80.71	1.79	71.76	Bacteria	Firmicutes	Clostridia	Oscillospirales	Ruminococcaceae	Faecalibacterium	Faecalibacterium prausnitzii
PE01.bin.58	clu_330	85	1987442	34439	10787	145064	58.77	68.65	91.43	4.25	70.18	Bacteria	Firmicutes	Clostridia	Oscillospirales	Ruminococcaceae	Faecalibacterium	Faecalibacterium prausnitzii
CN02.bin.52	clu_331	45	2214192	66177	22022	244131	59.99	109.26	91.97	1.53	84.32	Bacteria	Firmicutes	Clostridia	Oscillospirales	Ruminococcaceae	Faecalibacterium	Unknown
CN23.bin.20	clu_331	44	2423737	83073	30116	170284	59.76	33.81	97.81	0.85	93.56	Bacteria	Firmicutes	Clostridia	Oscillospirales	Ruminococcaceae	Faecalibacterium	Unknown
PE13.bin.42	clu_331	106	2553536	35616	12877	127993	59.68	21.9	97.24	4.59	74.29	Bacteria	Firmicutes	Clostridia	Oscillospirales	Ruminococcaceae	Faecalibacterium	Unknown
PE12.bin.5	clu_331	70	2045278	45878	14523	201747	60.32	112.82	89.32	0.85	85.07	Bacteria	Firmicutes	Clostridia	Oscillospirales	Ruminococcaceae	Faecalibacterium	Unknown
CN36.bin.33	clu_331	72	2086790	45441	13127	305785	60.09	229.23	93.22	1.02	88.12	Bacteria	Firmicutes	Clostridia	Oscillospirales	Ruminococcaceae	Faecalibacterium	Unknown
PE05.bin.53	clu_331	56	2122370	52298	20746	200352	60.32	114.27	93.72	1.19	87.77	Bacteria	Firmicutes	Clostridia	Oscillospirales	Ruminococcaceae	Faecalibacterium	Unknown
PE27.bin.41	clu_331	342	1739505	5739	2758	22543	60.84	8.69	71.93	0.17	71.08	Bacteria	Firmicutes	Clostridia	Oscillospirales	Ruminococcaceae	Faecalibacterium	Unknown
CN25.bin.113	clu_331	56	2133530	48229	20789	223890	60.34	263.86	94.19	0.85	89.94	Bacteria	Firmicutes	Clostridia	Oscillospirales	Ruminococcaceae	Faecalibacterium	Unknown
CN11.bin.33	clu_331	74	1750883	31107	11767	120778	60.6	35.42	87.13	1.55	79.38	Bacteria	Firmicutes	Clostridia	Oscillospirales	Ruminococcaceae	Faecalibacterium	Unknown
CN27.bin.10	clu_331	81	1889843	30571	12038	95370	60.29	20.69	70.61	0.34	68.91	Bacteria	Firmicutes	Clostridia	Oscillospirales	Ruminococcaceae	Faecalibacterium	Unknown
CN20.bin.42	clu_331	69	1985233	41992	15195	166853	60.23	40.35	84.24	1.93	74.59	Bacteria	Firmicutes	Clostridia	Oscillospirales	Ruminococcaceae	Faecalibacterium	Unknown
CN34.bin.85	clu_331	133	2118706	23472	7915	60450	60.67	13.65	90.84	1.53	83.19	Bacteria	Firmicutes	Clostridia	Oscillospirales	Ruminococcaceae	Faecalibacterium	Unknown
PE08.bin.16	clu_332	52	2191631	61860	26017	322481	57.65	52.68	92.73	0.85	88.48	Bacteria	Firmicutes	Clostridia	Oscillospirales	Ruminococcaceae	Faecalibacterium	Faecalibacterium prausnitzii
PE32.bin.18	clu_332	326	1563724	5418	2693	22405	58.22	8.52	76.55	2.04	66.35	Bacteria	Firmicutes	Clostridia	Oscillospirales	Ruminococcaceae	Faecalibacterium	Faecalibacterium prausnitzii
CN09.bin.36	clu_332	53	2363378	74621	27097	177716	57.16	159.74	92.98	0.68	89.58	Bacteria	Firmicutes	Clostridia	Oscillospirales	Ruminococcaceae	Faecalibacterium	Faecalibacterium prausnitzii
PE03.bin.46	clu_332	43	2322950	74530	31886	236682	56.94	23.13	95.92	0.68	92.52	Bacteria	Firmicutes	Clostridia	Oscillospirales	Ruminococcaceae	Faecalibacterium	Faecalibacterium prausnitzii
PE33.bin.1	clu_332	72	2039222	45447	15309	150877	58.02	68.83	91.79	4.76	67.99	Bacteria	Firmicutes	Clostridia	Oscillospirales	Ruminococcaceae	Faecalibacterium	Faecalibacterium prausnitzii
CN20.bin.19	clu_332	126	1888285	23203	6562	73153	58.07	360.06	73.57	0.89	69.12	Bacteria	Firmicutes	Clostridia	Oscillospirales	Ruminococcaceae	Faecalibacterium	Faecalibacterium prausnitzii
PE01.bin.74	clu_332	77	2034199	35484	14031	138870	57.77	219.1	75.32	0.89	70.87	Bacteria	Firmicutes	Clostridia	Oscillospirales	Ruminococcaceae	Faecalibacterium	Faecalibacterium prausnitzii
CN34.bin.70	clu_332	70	2349005	47340	17500	150908	57.09	160.73	98.85	0.85	94.6	Bacteria	Firmicutes	Clostridia	Oscillospirales	Ruminococcaceae	Faecalibacterium	Faecalibacterium prausnitzii
PE36.bin.20	clu_332	71	2060852	49255	12489	126620	57.83	77.13	75.18	1.79	66.23	Bacteria	Firmicutes	Clostridia	Oscillospirales	Ruminococcaceae	Faecalibacterium	Faecalibacterium prausnitzii
CN32.bin.11	clu_332	75	2360407	44087	17737	115117	57.7	54.15	97.68	4.59	74.73	Bacteria	Firmicutes	Clostridia	Oscillospirales	Ruminococcaceae	Faecalibacterium	Faecalibacterium prausnitzii
CN27.bin.43	clu_332	81	2037108	33900	12459	94248	57.81	59.27	71.61	2.68	58.21	Bacteria	Firmicutes	Clostridia	Oscillospirales	Ruminococcaceae	Faecalibacterium	Faecalibacterium prausnitzii
PE05.bin.16	clu_332	64	2224334	56589	16589	208037	57.35	47.43	83.78	1.02	78.68	Bacteria	Firmicutes	Clostridia	Oscillospirales	Ruminococcaceae	Faecalibacterium	Faecalibacterium prausnitzii
PE07.bin.91	clu_332	166	1988826	16831	5948	62906	58.16	31.94	71.79	0	71.79	Bacteria	Firmicutes	Clostridia	Oscillospirales	Ruminococcaceae	Faecalibacterium	Faecalibacterium prausnitzii
CN29.bin.110	clu_333	53	2107668	62562	19529	189306	60.38	47	96.77	2.21	85.72	Bacteria	Firmicutes	Clostridia	Oscillospirales	Ruminococcaceae	Faecalibacterium	Faecalibacterium prausnitzii
PE09.bin.76	clu_333	74	1961390	37484	13676	139369	60.69	108.7	86.73	2.72	73.13	Bacteria	Firmicutes	Clostridia	Oscillospirales	Ruminococcaceae	Faecalibacterium	Faecalibacterium prausnitzii
CN35.bin.30	clu_333	155	1734323	15158	5125	61897	61.23	11.66	70	3.57	52.15	Bacteria	Firmicutes	Clostridia	Oscillospirales	Ruminococcaceae	Faecalibacterium	Faecalibacterium prausnitzii
PE30.bin.41	clu_334	192	2044893	14555	5104	51304	59.38	35.97	88.75	2.89	74.3	Bacteria	Firmicutes	Clostridia	Oscillospirales	Ruminococcaceae	Faecalibacterium	Faecalibacterium prausnitzii
CN29.bin.47	clu_334	53	1994744	59392	21565	168003	58.99	26.39	96.73	0.68	93.33	Bacteria	Firmicutes	Clostridia	Oscillospirales	Ruminococcaceae	Faecalibacterium	Faecalibacterium prausnitzii
PE35.bin.93	clu_334	140	2050769	22226	6690	78360	59.17	153.11	76.25	3.57	58.4	Bacteria	Firmicutes	Clostridia	Oscillospirales	Ruminococcaceae	Faecalibacterium	Faecalibacterium prausnitzii
CN36.bin.106	clu_334	73	2120755	43166	13871	184172	58.88	69.12	93.67	1.7	85.17	Bacteria	Firmicutes	Clostridia	Oscillospirales	Ruminococcaceae	Faecalibacterium	Faecalibacterium prausnitzii
CN03.bin.26	clu_334	222	1817919	10899	4067	38568	59.48	137.88	82.44	1.02	77.34	Bacteria	Firmicutes	Clostridia	Oscillospirales	Ruminococcaceae	Faecalibacterium	Faecalibacterium prausnitzii
CN20.bin.26	clu_334	48	1770438	60133	15717	192585	58.81	126.71	73.57	3.57	55.72	Bacteria	Firmicutes	Clostridia	Oscillospirales	Ruminococcaceae	Faecalibacterium	Faecalibacterium prausnitzii
CN35.bin.22	clu_334	173	2167810	17991	6040	69905	59.12	12.2	73.57	1.79	64.62	Bacteria	Firmicutes	Clostridia	Oscillospirales	Ruminococcaceae	Faecalibacterium	Faecalibacterium prausnitzii
CN32.bin.15	clu_334	169	2019927	19029	5630	58342	59.43	17.3	90.76	3	75.76	Bacteria	Firmicutes	Clostridia	Oscillospirales	Ruminococcaceae	Faecalibacterium	Faecalibacterium prausnitzii
CN05.bin.24	clu_334	134	1786366	19077	5772	90122	59.22	65.62	81	3.74	62.3	Bacteria	Firmicutes	Clostridia	Oscillospirales	Ruminococcaceae	Faecalibacterium	Faecalibacterium prausnitzii
PE04.bin.55	clu_334	88	2343556	45555	13863	210807	58.48	40.74	96.15	2.55	83.4	Bacteria	Firmicutes	Clostridia	Oscillospirales	Ruminococcaceae	Faecalibacterium	Faecalibacterium prausnitzii
CN21.bin.87	clu_334	55	1931856	51677	16833	164014	59.1	120.62	80.86	3	65.86	Bacteria	Firmicutes	Clostridia	Oscillospirales	Ruminococcaceae	Faecalibacterium	Faecalibacterium prausnitzii
PE14.bin.14	clu_335	116	1717494	20694	7347	98391	59.54	15.4	75.65	0.68	72.25	Bacteria	Firmicutes	Clostridia	Oscillospirales	Ruminococcaceae	Faecalibacterium	Faecalibacterium prausnitzii
CN28.bin.23	clu_335	61	1866084	44500	15735	181890	59.28	65.49	92.67	0.51	90.12	Bacteria	Firmicutes	Clostridia	Oscillospirales	Ruminococcaceae	Faecalibacterium	Faecalibacterium prausnitzii
PE17.bin.70	clu_335	207	1867343	12618	4032	43698	59.84	18.36	70.89	1.79	61.94	Bacteria	Firmicutes	Clostridia	Oscillospirales	Ruminococcaceae	Faecalibacterium	Faecalibacterium prausnitzii
CN37.bin.10	clu_336	38	2266972	82770	23693	154969	58.85	88.25	95.92	0	95.92	Bacteria	Firmicutes	Clostridia	Oscillospirales	Ruminococcaceae	Faecalibacterium	Faecalibacterium prausnitzii
CN31.bin.46	clu_336	92	2178893	40388	10580	90217	60.11	14.15	97.24	1.38	90.34	Bacteria	Firmicutes	Clostridia	Oscillospirales	Ruminococcaceae	Faecalibacterium	Faecalibacterium prausnitzii
PE22.bin.32	clu_336	299	1652708	6444	2929	27737	60.41	120.87	82.69	2.38	70.79	Bacteria	Firmicutes	Clostridia	Oscillospirales	Ruminococcaceae	Faecalibacterium	Faecalibacterium prausnitzii
CN12.bin.60	clu_336	45	2448218	100640	24383	255339	58.8	48.83	99.83	0	99.83	Bacteria	Firmicutes	Clostridia	Oscillospirales	Ruminococcaceae	Faecalibacterium	Faecalibacterium prausnitzii
CN34.bin.79	clu_336	56	2290846	61838	22527	200455	59.41	89.77	99.36	0.51	96.81	Bacteria	Firmicutes	Clostridia	Oscillospirales	Ruminococcaceae	Faecalibacterium	Faecalibacterium prausnitzii
CN02.bin.2	clu_336	270	1808195	7991	3472	40696	60.53	21.64	82.48	0.85	78.23	Bacteria	Firmicutes	Clostridia	Oscillospirales	Ruminococcaceae	Faecalibacterium	Faecalibacterium prausnitzii
CN23.bin.6	clu_336	357	1771908	5601	2746	24765	60.84	12.7	87.14	1.5	79.64	Bacteria	Firmicutes	Clostridia	Oscillospirales	Ruminococcaceae	Faecalibacterium	Faecalibacterium prausnitzii
PE13.bin.20	clu_336	164	1807831	15133	5268	44643	60.48	17.83	87.47	0.8	83.47	Bacteria	Firmicutes	Clostridia	Oscillospirales	Ruminococcaceae	Faecalibacterium	Faecalibacterium prausnitzii
PE26.bin.16	clu_336	287	1516634	5955	2858	23467	60.55	23.39	73.14	1.7	64.64	Bacteria	Firmicutes	Clostridia	Oscillospirales	Ruminococcaceae	Faecalibacterium	Faecalibacterium prausnitzii
PE18.bin.4	clu_336	45	2320005	92458	27045	169841	58.98	63.44	98.64	0.85	94.39	Bacteria	Firmicutes	Clostridia	Oscillospirales	Ruminococcaceae	Faecalibacterium	Faecalibacterium prausnitzii
PE05.bin.48	clu_336	104	1900725	25808	8995	96288	60.42	50.71	94.5	0.34	92.8	Bacteria	Firmicutes	Clostridia	Oscillospirales	Ruminococcaceae	Faecalibacterium	Faecalibacterium prausnitzii
PE23.bin.48	clu_336	220	1860253	11699	3983	36521	60.41	45.47	84.09	2.48	71.69	Bacteria	Firmicutes	Clostridia	Oscillospirales	Ruminococcaceae	Faecalibacterium	Faecalibacterium prausnitzii
PE08.bin.10	clu_336	58	2288167	54284	23002	272429	59.5	80.75	99.3	3.57	81.45	Bacteria	Firmicutes	Clostridia	Oscillospirales	Ruminococcaceae	Faecalibacterium	Faecalibacterium prausnitzii
PE25.bin.27	clu_336	42	2704604	112461	28216	243532	58.11	46.76	100	0	100	Bacteria	Firmicutes	Clostridia	Oscillospirales	Ruminococcaceae	Faecalibacterium	Faecalibacterium prausnitzii
PE36.bin.42	clu_336	52	2108121	61993	20037	163794	59.74	39.96	95.05	3.8	76.05	Bacteria	Firmicutes	Clostridia	Oscillospirales	Ruminococcaceae	Faecalibacterium	Faecalibacterium prausnitzii
PE33.bin.35	clu_336	69	1808625	33446	13804	112230	59.97	221.79	77.63	1.02	72.53	Bacteria	Firmicutes	Clostridia	Oscillospirales	Ruminococcaceae	Faecalibacterium	Faecalibacterium prausnitzii
CN25.bin.31	clu_336	47	2148432	90213	22312	166023	59	73.96	89.43	0.85	85.18	Bacteria	Firmicutes	Clostridia	Oscillospirales	Ruminococcaceae	Faecalibacterium	Faecalibacterium prausnitzii
CN08.bin.45	clu_336	77	2160841	36202	17965	95819	59.9	23.88	98.26	3.98	78.36	Bacteria	Firmicutes	Clostridia	Oscillospirales	Ruminococcaceae	Faecalibacterium	Faecalibacterium prausnitzii
PE35.bin.38	clu_336	230	1928508	10728	3979	83615	59.68	146.27	80.61	4.22	59.51	Bacteria	Firmicutes	Clostridia	Oscillospirales	Ruminococcaceae	Faecalibacterium	Faecalibacterium prausnitzii
CN27.bin.9	clu_336	49	2022882	52577	22511	169319	59.55	42.7	86.69	2.55	73.94	Bacteria	Firmicutes	Clostridia	Oscillospirales	Ruminococcaceae	Faecalibacterium	Faecalibacterium prausnitzii
PE07.bin.44	clu_336	194	1948568	13684	4805	50460	60.3	151.78	81.31	3.42	64.21	Bacteria	Firmicutes	Clostridia	Oscillospirales	Ruminococcaceae	Faecalibacterium	Faecalibacterium prausnitzii
CN09.bin.4	clu_336	56	2086994	55146	18181	171402	59.95	57.28	95.85	4.76	72.05	Bacteria	Firmicutes	Clostridia	Oscillospirales	Ruminococcaceae	Faecalibacterium	Faecalibacterium prausnitzii
PE17.bin.23	clu_336	176	1791417	13914	4662	53092	59.97	61.76	80.81	2.61	67.76	Bacteria	Firmicutes	Clostridia	Oscillospirales	Ruminococcaceae	Faecalibacterium	Faecalibacterium prausnitzii
PE38.bin.42	clu_336	74	2025626	41141	17141	82096	60.05	103.8	83.67	3.29	67.22	Bacteria	Firmicutes	Clostridia	Oscillospirales	Ruminococcaceae	Faecalibacterium	Faecalibacterium prausnitzii
CN14.bin.3	clu_336	164	2001944	17179	6238	72896	60.04	280.86	93.93	4.25	72.68	Bacteria	Firmicutes	Clostridia	Oscillospirales	Ruminococcaceae	Faecalibacterium	Faecalibacterium prausnitzii
CN28.bin.37	clu_336	217	1671590	11028	3797	32308	60.66	24.81	78.65	1.81	69.6	Bacteria	Firmicutes	Clostridia	Oscillospirales	Ruminococcaceae	Faecalibacterium	Faecalibacterium prausnitzii
CN10.bin.35	clu_336	251	1804713	9667	3281	38076	60.27	29.83	80.6	4.27	59.25	Bacteria	Firmicutes	Clostridia	Oscillospirales	Ruminococcaceae	Faecalibacterium	Faecalibacterium prausnitzii
PE02.bin.12	clu_336	308	1935261	7677	3291	32046	60.65	19.66	84.16	2.98	69.26	Bacteria	Firmicutes	Clostridia	Oscillospirales	Ruminococcaceae	Faecalibacterium	Faecalibacterium prausnitzii
CN03.bin.69	clu_337	164	2294776	20104	6759	93645	59.12	23.03	94.56	0	94.56	Bacteria	Firmicutes	Clostridia	Oscillospirales	Ruminococcaceae	Gemmiger	Unknown
PE09.bin.105	clu_337	55	2141476	61933	18167	125242	58.81	154.67	86.5	0.65	83.25	Bacteria	Firmicutes	Clostridia	Oscillospirales	Ruminococcaceae	Gemmiger	Unknown
CN36.bin.65	clu_337	86	2448981	40065	14528	101566	58.43	31.58	94.32	0.68	90.92	Bacteria	Firmicutes	Clostridia	Oscillospirales	Ruminococcaceae	Gemmiger	Unknown
PE06.bin.37	clu_337	160	2287086	20055	7101	94187	59.25	34.13	92.69	0.51	90.14	Bacteria	Firmicutes	Clostridia	Oscillospirales	Ruminococcaceae	Gemmiger	Unknown
PE14.bin.21	clu_337	116	2987153	41155	11604	144617	58.59	26.46	93.71	4.42	71.61	Bacteria	Firmicutes	Clostridia	Oscillospirales	Ruminococcaceae	Gemmiger	Unknown
PE29.bin.29	clu_337	86	2244242	37334	12674	139311	59.02	27.92	93.71	0.34	92.01	Bacteria	Firmicutes	Clostridia	Oscillospirales	Ruminococcaceae	Gemmiger	Unknown
CN13.bin.22	clu_337	111	2212041	26935	9814	65656	58.92	26.25	86.84	0	86.84	Bacteria	Firmicutes	Clostridia	Oscillospirales	Ruminococcaceae	Gemmiger	Unknown
CN05.bin.18	clu_337	188	2300206	17463	5721	61854	59.34	17.92	91.59	2.89	77.14	Bacteria	Firmicutes	Clostridia	Oscillospirales	Ruminococcaceae	Gemmiger	Unknown
PE33.bin.63	clu_337	183	2193350	16991	6091	70999	59.39	15.26	82.32	2.68	68.92	Bacteria	Firmicutes	Clostridia	Oscillospirales	Ruminococcaceae	Gemmiger	Unknown
PE30.bin.52	clu_337	215	2173990	13282	4994	52677	59.74	17.59	80.52	0	80.52	Bacteria	Firmicutes	Clostridia	Oscillospirales	Ruminococcaceae	Gemmiger	Unknown
PE17.bin.72	clu_337	296	1829648	7388	3168	31575	60.1	14.05	71.43	0	71.43	Bacteria	Firmicutes	Clostridia	Oscillospirales	Ruminococcaceae	Gemmiger	Unknown
CN29.bin.98	clu_337	309	2269832	9412	3509	35459	59.35	10.63	88.31	2.03	78.16	Bacteria	Firmicutes	Clostridia	Oscillospirales	Ruminococcaceae	Gemmiger	Unknown
PE07.bin.41	clu_337	273	2168407	10215	3954	31928	59.49	16.68	72.32	1.79	63.37	Bacteria	Firmicutes	Clostridia	Oscillospirales	Ruminococcaceae	Gemmiger	Unknown
CN28.bin.14	clu_337	230	1810398	10535	3612	48514	59.69	16.13	79.11	0.68	75.71	Bacteria	Firmicutes	Clostridia	Oscillospirales	Ruminococcaceae	Gemmiger	Unknown
CN19.bin.49	clu_338	50	2288130	88979	25603	217379	60.32	142.13	95.92	0.68	92.52	Bacteria	Firmicutes	Clostridia	Oscillospirales	Ruminococcaceae	Gemmiger	Gemmiger formicilis
CN18.bin.13	clu_338	156	2498585	25016	7509	85493	60.24	218.03	93.93	0.74	90.23	Bacteria	Firmicutes	Clostridia	Oscillospirales	Ruminococcaceae	Gemmiger	Gemmiger formicilis
CN32.bin.9	clu_338	79	2421369	52238	15637	157583	60.38	74.23	94.1	0	94.1	Bacteria	Firmicutes	Clostridia	Oscillospirales	Ruminococcaceae	Gemmiger	Gemmiger formicilis
PE12.bin.22	clu_338	50	2220789	74935	22094	277341	60.74	56.04	95.24	0	95.24	Bacteria	Firmicutes	Clostridia	Oscillospirales	Ruminococcaceae	Gemmiger	Gemmiger formicilis
CN02.bin.67	clu_338	59	2244494	56883	19977	173536	60.35	166.17	81.63	0	81.63	Bacteria	Firmicutes	Clostridia	Oscillospirales	Ruminococcaceae	Gemmiger	Gemmiger formicilis
PE23.bin.51	clu_338	94	2673874	50531	15243	206604	59.81	458.66	94.56	2.72	80.96	Bacteria	Firmicutes	Clostridia	Oscillospirales	Ruminococcaceae	Gemmiger	Gemmiger formicilis
PE21.bin.23	clu_338	85	2446516	47134	12911	185094	60.43	24.41	94.97	0.02	94.87	Bacteria	Firmicutes	Clostridia	Oscillospirales	Ruminococcaceae	Gemmiger	Gemmiger formicilis
PE07.bin.14	clu_338	61	2513185	52791	24312	242728	60.2	253.84	96.26	1.36	89.46	Bacteria	Firmicutes	Clostridia	Oscillospirales	Ruminococcaceae	Gemmiger	Gemmiger formicilis
CN10.bin.18	clu_338	172	2307845	18552	5879	70923	60.82	58.71	92.55	2.04	82.35	Bacteria	Firmicutes	Clostridia	Oscillospirales	Ruminococcaceae	Gemmiger	Gemmiger formicilis
CN28.bin.21	clu_338	66	2659667	61069	23243	132245	60.09	69.8	96.53	2.38	84.63	Bacteria	Firmicutes	Clostridia	Oscillospirales	Ruminococcaceae	Gemmiger	Gemmiger formicilis
CN36.bin.31	clu_338	58	1987008	55866	18836	128091	61.05	21.44	76.41	0.34	74.71	Bacteria	Firmicutes	Clostridia	Oscillospirales	Ruminococcaceae	Gemmiger	Gemmiger formicilis
CN29.bin.12	clu_338	96	2470689	38189	13098	204558	60.37	15.6	95.81	1.02	90.71	Bacteria	Firmicutes	Clostridia	Oscillospirales	Ruminococcaceae	Gemmiger	Gemmiger formicilis
PE29.bin.57	clu_338	124	2152452	27210	8022	76105	60.98	102.9	94.05	2.38	82.15	Bacteria	Firmicutes	Clostridia	Oscillospirales	Ruminococcaceae	Gemmiger	Gemmiger formicilis
CN11.bin.39	clu_338	178	2192539	16857	5892	86433	61.26	11.52	90.18	0.68	86.78	Bacteria	Firmicutes	Clostridia	Oscillospirales	Ruminococcaceae	Gemmiger	Gemmiger formicilis
CN13.bin.24	clu_338	144	2179742	21120	7216	80990	60.83	134.35	86.82	1.36	80.02	Bacteria	Firmicutes	Clostridia	Oscillospirales	Ruminococcaceae	Gemmiger	Gemmiger formicilis
CN05.bin.92	clu_338	96	2072758	31253	10714	176541	61.06	42.7	82.83	0.51	80.28	Bacteria	Firmicutes	Clostridia	Oscillospirales	Ruminococcaceae	Gemmiger	Gemmiger formicilis
CN35.bin.59	clu_338	41	1891057	68444	22916	150575	59.71	68.43	78.87	4.08	58.47	Bacteria	Firmicutes	Clostridia	Oscillospirales	Ruminococcaceae	Gemmiger	Gemmiger formicilis
CN21.bin.64	clu_338	146	2371528	24103	7461	136916	60.45	107.84	89.12	2.04	78.92	Bacteria	Firmicutes	Clostridia	Oscillospirales	Ruminococcaceae	Gemmiger	Gemmiger formicilis
PE06.bin.22	clu_338	102	2084700	36344	9224	116192	61.14	299.77	87.47	2.21	76.42	Bacteria	Firmicutes	Clostridia	Oscillospirales	Ruminococcaceae	Gemmiger	Gemmiger formicilis
PE26.bin.26	clu_338	99	2043095	31540	10097	85030	61.06	47.71	87.33	0.99	82.38	Bacteria	Firmicutes	Clostridia	Oscillospirales	Ruminococcaceae	Gemmiger	Gemmiger formicilis
PE14.bin.10	clu_338	109	2130838	27548	9708	75304	61.29	20.23	86.45	4.59	63.5	Bacteria	Firmicutes	Clostridia	Oscillospirales	Ruminococcaceae	Gemmiger	Gemmiger formicilis
CN06.bin.38	clu_338	241	2211516	12470	4461	58305	60.99	49.67	90.02	0.68	86.62	Bacteria	Firmicutes	Clostridia	Oscillospirales	Ruminococcaceae	Gemmiger	Gemmiger formicilis
PE08.bin.49	clu_339	41	2501367	74589	31496	280859	58.56	222.83	92.52	2.04	82.32	Bacteria	Firmicutes	Clostridia	Oscillospirales	Ruminococcaceae	Gemmiger	Unknown
PE09.bin.87	clu_339	76	2700138	52292	18931	208061	58.83	288.29	95.34	4.05	75.09	Bacteria	Firmicutes	Clostridia	Oscillospirales	Ruminococcaceae	Gemmiger	Unknown
CN25.bin.17	clu_340	22	2101762	167434	51394	323739	57.72	42.74	78.23	0	78.23	Bacteria	Firmicutes	Clostridia	Oscillospirales	Ruminococcaceae	Gemmiger	Unknown
PE03.bin.2	clu_340	30	2480077	146171	41084	365103	57.76	131.87	82.31	3.4	65.31	Bacteria	Firmicutes	Clostridia	Oscillospirales	Ruminococcaceae	Gemmiger	Unknown
PE36.bin.73	clu_340	148	2237085	24059	6859	89051	59.65	115.78	89.8	0.68	86.4	Bacteria	Firmicutes	Clostridia	Oscillospirales	Ruminococcaceae	Gemmiger	Unknown
CN27.bin.21	clu_340	45	2522156	91969	29112	186174	58.42	35.37	92.52	0.68	89.12	Bacteria	Firmicutes	Clostridia	Oscillospirales	Ruminococcaceae	Gemmiger	Unknown
PE33.bin.10	clu_340	77	1534130	25247	10771	111078	59.55	106.05	75.94	0.17	75.09	Bacteria	Firmicutes	Clostridia	Oscillospirales	Ruminococcaceae	Gemmiger	Unknown
PE17.bin.28	clu_340	144	2178368	21458	7122	72154	59.88	47.09	92.41	0.99	87.46	Bacteria	Firmicutes	Clostridia	Oscillospirales	Ruminococcaceae	Gemmiger	Unknown
PE26.bin.52	clu_340	99	2217528	29286	11208	111040	59.77	53.18	89.58	3.23	73.43	Bacteria	Firmicutes	Clostridia	Oscillospirales	Ruminococcaceae	Gemmiger	Unknown
PE14.bin.19	clu_340	175	1922695	15509	5395	79972	59.97	12.91	87.8	1.36	81	Bacteria	Firmicutes	Clostridia	Oscillospirales	Ruminococcaceae	Gemmiger	Unknown
PE26.bin.67	clu_341	206	2389625	15767	5646	70793	56.31	26.23	91.27	0.68	87.87	Bacteria	Firmicutes	Clostridia	Oscillospirales	Ruminococcaceae	Gemmiger	Gemmiger qucibialis
PE14.bin.8	clu_341	245	2386781	13263	4727	47966	56.48	50.56	96.94	2.04	86.74	Bacteria	Firmicutes	Clostridia	Oscillospirales	Ruminococcaceae	Gemmiger	Gemmiger qucibialis
CN08.bin.44	clu_341	313	2794838	12147	4238	39212	56.16	20.54	93.65	1.36	86.85	Bacteria	Firmicutes	Clostridia	Oscillospirales	Ruminococcaceae	Gemmiger	Gemmiger qucibialis
PE16.bin.7	clu_341	221	2768427	17134	5549	136631	55.73	127.29	96.6	0.68	93.2	Bacteria	Firmicutes	Clostridia	Oscillospirales	Ruminococcaceae	Gemmiger	Gemmiger qucibialis
PE19.bin.61	clu_341	199	2549597	18647	6114	103887	56.15	64.77	89.46	0.68	86.06	Bacteria	Firmicutes	Clostridia	Oscillospirales	Ruminococcaceae	Gemmiger	Gemmiger qucibialis
PE01.bin.29	clu_341	201	2527079	17052	5627	90854	56.46	62.48	95.58	1.36	88.78	Bacteria	Firmicutes	Clostridia	Oscillospirales	Ruminococcaceae	Gemmiger	Gemmiger qucibialis
CN09.bin.3	clu_341	212	2470130	16751	5494	55782	56.47	101.07	95.24	0.68	91.84	Bacteria	Firmicutes	Clostridia	Oscillospirales	Ruminococcaceae	Gemmiger	Gemmiger qucibialis
CN16.bin.12	clu_341	172	2173018	18661	5784	97713	56.67	176.48	89.57	0.68	86.17	Bacteria	Firmicutes	Clostridia	Oscillospirales	Ruminococcaceae	Gemmiger	Gemmiger qucibialis
PE07.bin.46	clu_341	239	2458613	13183	4946	67826	56.61	58.04	98.64	0.68	95.24	Bacteria	Firmicutes	Clostridia	Oscillospirales	Ruminococcaceae	Gemmiger	Gemmiger qucibialis
CN17.bin.30	clu_341	211	2396920	15898	5521	49473	56.5	106.49	97.28	0.68	93.88	Bacteria	Firmicutes	Clostridia	Oscillospirales	Ruminococcaceae	Gemmiger	Gemmiger qucibialis
PE33.bin.39	clu_341	216	2413400	14406	5367	56348	56.51	24.28	98.3	0.68	94.9	Bacteria	Firmicutes	Clostridia	Oscillospirales	Ruminococcaceae	Gemmiger	Gemmiger qucibialis
PE13.bin.38	clu_341	216	2693529	17525	6099	110889	56.19	155.26	96.26	0.68	92.86	Bacteria	Firmicutes	Clostridia	Oscillospirales	Ruminococcaceae	Gemmiger	Gemmiger qucibialis
PE30.bin.12	clu_341	255	2509065	13273	4692	42652	56.39	160.77	96.37	1.36	89.57	Bacteria	Firmicutes	Clostridia	Oscillospirales	Ruminococcaceae	Gemmiger	Gemmiger qucibialis
CN07.bin.41	clu_341	218	2717063	16532	6124	92067	55.96	77.13	96.04	0.91	91.49	Bacteria	Firmicutes	Clostridia	Oscillospirales	Ruminococcaceae	Gemmiger	Gemmiger qucibialis
CN32.bin.29	clu_341	248	2595942	14278	5034	57429	56.42	41.78	99.28	1.57	91.43	Bacteria	Firmicutes	Clostridia	Oscillospirales	Ruminococcaceae	Gemmiger	Gemmiger qucibialis
CN29.bin.67	clu_341	225	2576651	17363	5446	75247	56.33	35.93	96.05	1.36	89.25	Bacteria	Firmicutes	Clostridia	Oscillospirales	Ruminococcaceae	Gemmiger	Gemmiger qucibialis
PE12.bin.21	clu_341	324	2319288	9352	3609	71694	56.6	13.13	89.91	0.68	86.51	Bacteria	Firmicutes	Clostridia	Oscillospirales	Ruminococcaceae	Gemmiger	Gemmiger qucibialis
PE36.bin.13	clu_341	212	2393151	15098	5487	59617	56.41	22.08	94.56	0.68	91.16	Bacteria	Firmicutes	Clostridia	Oscillospirales	Ruminococcaceae	Gemmiger	Gemmiger qucibialis
CN11.bin.40	clu_341	220	2576952	16162	6207	43637	56.49	36.89	95.28	0.68	91.88	Bacteria	Firmicutes	Clostridia	Oscillospirales	Ruminococcaceae	Gemmiger	Gemmiger qucibialis
CN10.bin.71	clu_341	256	2731482	15403	5234	41938	55.94	69.05	94.94	0.68	91.54	Bacteria	Firmicutes	Clostridia	Oscillospirales	Ruminococcaceae	Gemmiger	Gemmiger qucibialis
CN33.bin.21	clu_341	204	2396021	16209	5690	43117	56.42	26.4	98.3	0.68	94.9	Bacteria	Firmicutes	Clostridia	Oscillospirales	Ruminococcaceae	Gemmiger	Gemmiger qucibialis
PE29.bin.64	clu_341	227	2565138	15251	5445	46365	56.44	22.26	97.32	0.68	93.92	Bacteria	Firmicutes	Clostridia	Oscillospirales	Ruminococcaceae	Gemmiger	Gemmiger qucibialis
CN20.bin.27	clu_341	218	2380614	14110	5656	66094	56.55	26.67	91.16	1.36	84.36	Bacteria	Firmicutes	Clostridia	Oscillospirales	Ruminococcaceae	Gemmiger	Gemmiger qucibialis
CN27.bin.98	clu_341	195	2515545	17169	6312	72485	56.3	23.98	94.9	0	94.9	Bacteria	Firmicutes	Clostridia	Oscillospirales	Ruminococcaceae	Gemmiger	Gemmiger qucibialis
PE35.bin.21	clu_341	210	2466891	16801	5241	52283	56.16	30.43	95.3	0.74	91.6	Bacteria	Firmicutes	Clostridia	Oscillospirales	Ruminococcaceae	Gemmiger	Gemmiger qucibialis
PE04.bin.52	clu_341	218	2402930	14404	5313	69649	56.57	21.39	96.94	1.36	90.14	Bacteria	Firmicutes	Clostridia	Oscillospirales	Ruminococcaceae	Gemmiger	Gemmiger qucibialis
PE06.bin.66	clu_341	234	2449142	14025	4974	65450	56.41	42.47	96.98	1.7	88.48	Bacteria	Firmicutes	Clostridia	Oscillospirales	Ruminococcaceae	Gemmiger	Gemmiger qucibialis
PE08.bin.52	clu_341	249	2433985	13069	4535	49583	56.22	38.96	93.88	0.68	90.48	Bacteria	Firmicutes	Clostridia	Oscillospirales	Ruminococcaceae	Gemmiger	Gemmiger qucibialis
CN35.bin.47	clu_341	203	2328677	14805	5685	40815	56.49	23.56	95.96	0.68	92.56	Bacteria	Firmicutes	Clostridia	Oscillospirales	Ruminococcaceae	Gemmiger	Gemmiger qucibialis
PE17.bin.44	clu_341	228	2487535	15422	5051	57333	56.56	73.7	95.69	0.68	92.29	Bacteria	Firmicutes	Clostridia	Oscillospirales	Ruminococcaceae	Gemmiger	Gemmiger qucibialis
CN02.bin.68	clu_341	210	2534894	16274	5717	57961	56.15	23.05	95.96	0.68	92.56	Bacteria	Firmicutes	Clostridia	Oscillospirales	Ruminococcaceae	Gemmiger	Gemmiger qucibialis
CN21.bin.29	clu_341	233	2489600	14655	5349	50839	56.31	34.4	97.28	0.68	93.88	Bacteria	Firmicutes	Clostridia	Oscillospirales	Ruminococcaceae	Gemmiger	Gemmiger qucibialis
CN28.bin.27	clu_341	201	2335574	15229	5702	72698	56.56	132.03	93.2	1.36	86.4	Bacteria	Firmicutes	Clostridia	Oscillospirales	Ruminococcaceae	Gemmiger	Gemmiger qucibialis
CN03.bin.66	clu_341	214	2528317	16270	5479	67573	56.42	24.71	94.9	0.68	91.5	Bacteria	Firmicutes	Clostridia	Oscillospirales	Ruminococcaceae	Gemmiger	Gemmiger qucibialis
PE21.bin.33	clu_341	274	2363443	11725	4135	42466	56.57	190.41	95.92	0.68	92.52	Bacteria	Firmicutes	Clostridia	Oscillospirales	Ruminococcaceae	Gemmiger	Gemmiger qucibialis
CN22.bin.26	clu_341	240	2468588	14173	5028	64875	56.39	67.67	96.26	0	96.26	Bacteria	Firmicutes	Clostridia	Oscillospirales	Ruminococcaceae	Gemmiger	Gemmiger qucibialis
PE03.bin.36	clu_341	239	2436629	14178	4870	46875	56.35	16.84	90.93	1.02	85.83	Bacteria	Firmicutes	Clostridia	Oscillospirales	Ruminococcaceae	Gemmiger	Gemmiger qucibialis
PE28.bin.75	clu_341	238	2382306	15428	4255	69674	56.2	218.74	89.12	0.68	85.72	Bacteria	Firmicutes	Clostridia	Oscillospirales	Ruminococcaceae	Gemmiger	Gemmiger qucibialis
CN13.bin.9	clu_341	304	2374112	9781	3924	37400	56.79	26.88	92.46	2.04	82.26	Bacteria	Firmicutes	Clostridia	Oscillospirales	Ruminococcaceae	Gemmiger	Gemmiger qucibialis
CN05.bin.35	clu_341	387	2368239	7395	3147	49920	56.97	15.91	88.4	4.99	63.45	Bacteria	Firmicutes	Clostridia	Oscillospirales	Ruminococcaceae	Gemmiger	Gemmiger qucibialis
PE02.bin.68	clu_341	249	2596874	14326	5304	55997	56.2	32.31	93.88	0.68	90.48	Bacteria	Firmicutes	Clostridia	Oscillospirales	Ruminococcaceae	Gemmiger	Gemmiger qucibialis
PE06.bin.34	clu_342	42	2070088	68370	28685	166839	60.09	30.21	82.4	0.68	79	Bacteria	Firmicutes	Clostridia	Oscillospirales	Ruminococcaceae	Gemmiger	Unknown
CN08.bin.9	clu_343	40	2206254	84420	33245	175587	59.12	77.83	98.6	0.23	97.45	Bacteria	Firmicutes	Negativicutes	Selenomonadales	Selenomonadaceae	Mitsuokella	Mitsuokella multacida
CN07.bin.43	clu_343	74	2105059	43090	14909	133458	59.45	32.56	96.98	0.19	96.03	Bacteria	Firmicutes	Negativicutes	Selenomonadales	Selenomonadaceae	Mitsuokella	Mitsuokella multacida
PE07.bin.34	clu_344	221	1484195	8381	3391	34737	58.82	11.47	72.35	1.07	67	Bacteria	Firmicutes	Clostridia	Oscillospirales	Ruminococcaceae	Angelakisella	Unknown
CN09.bin.7	clu_345	370	2223837	7591	3051	31051	58.67	10.05	79.37	1.88	69.97	Bacteria	Synergistetes	Synergistia	Synergistales	Synergistaceae	Cloacibacillus	Cloacibacillus evryensis
CN29.bin.11	clu_346	60	3254259	86178	32767	209381	55.48	37.26	100	0	100	Bacteria	Synergistetes	Synergistia	Synergistales	Synergistaceae	Cloacibacillus	Cloacibacillus porcorum
PE01.bin.57	clu_347	45	2094609	70126	19679	259349	47.31	41.22	96.41	1.5	88.91	Bacteria	Firmicutes	Negativicutes	Acidaminococcales	Acidaminococcaceae	Phascolarctobacterium	Phascolarctobacterium succinatutens
PE02.bin.14	clu_347	23	2150916	136024	45484	251687	47.16	104.21	94.61	0.9	90.11	Bacteria	Firmicutes	Negativicutes	Acidaminococcales	Acidaminococcaceae	Phascolarctobacterium	Phascolarctobacterium succinatutens
PE04.bin.73	clu_347	127	2101179	23796	8125	97603	47.33	12.19	97.6	1.02	92.5	Bacteria	Firmicutes	Negativicutes	Acidaminococcales	Acidaminococcaceae	Phascolarctobacterium	Phascolarctobacterium succinatutens
PE29.bin.77	clu_348	111	1796191	24358	7409	124501	50.45	15.22	92.48	0.6	89.48	Bacteria	Firmicutes	Negativicutes	Acidaminococcales	Acidaminococcaceae	Phascolarctobacterium	Unknown
CN27.bin.86	clu_349	50	1719423	72263	13575	176654	42.67	12.27	84.01	1.2	78.01	Bacteria	Firmicutes	Negativicutes	Acidaminococcales	Acidaminococcaceae	Phascolarctobacterium	Phascolarctobacterium faecium
CN03.bin.53	clu_349	13	1397585	138404	52815	300282	42.85	18.75	79.92	0	79.92	Bacteria	Firmicutes	Negativicutes	Acidaminococcales	Acidaminococcaceae	Phascolarctobacterium	Phascolarctobacterium faecium
CN19.bin.58	clu_349	81	1378886	34916	7611	73038	42.84	32.06	73.03	0.6	70.03	Bacteria	Firmicutes	Negativicutes	Acidaminococcales	Acidaminococcaceae	Phascolarctobacterium	Phascolarctobacterium faecium
CN36.bin.73	clu_349	12	1654458	152484	72654	734509	42.64	59.39	82.02	0	82.02	Bacteria	Firmicutes	Negativicutes	Acidaminococcales	Acidaminococcaceae	Phascolarctobacterium	Phascolarctobacterium faecium
PE10.bin.30	clu_349	14	1376458	132545	38155	417302	42.59	31.29	76.03	0	76.03	Bacteria	Firmicutes	Negativicutes	Acidaminococcales	Acidaminococcaceae	Phascolarctobacterium	Phascolarctobacterium faecium
CN25.bin.18	clu_349	26	1653495	89871	34056	192135	42.56	77.19	89.8	0.3	88.3	Bacteria	Firmicutes	Negativicutes	Acidaminococcales	Acidaminococcaceae	Phascolarctobacterium	Phascolarctobacterium faecium
PE26.bin.46	clu_349	28	2363277	146163	37744	291372	43.68	19	99.98	1.5	92.48	Bacteria	Firmicutes	Negativicutes	Acidaminococcales	Acidaminococcaceae	Phascolarctobacterium	Phascolarctobacterium faecium
CN34.bin.8	clu_349	9	1755838	316651	71909	676005	42.96	55.62	84.11	1.2	78.11	Bacteria	Firmicutes	Negativicutes	Acidaminococcales	Acidaminococcaceae	Phascolarctobacterium	Phascolarctobacterium faecium
CN10.bin.61	clu_349	124	1509260	19108	5848	58591	42.58	17.86	79.17	2.59	66.22	Bacteria	Firmicutes	Negativicutes	Acidaminococcales	Acidaminococcaceae	Phascolarctobacterium	Phascolarctobacterium faecium
CN12.bin.50	clu_349	47	1710088	57560	16767	144220	42.7	22.99	86.81	1.79	77.86	Bacteria	Firmicutes	Negativicutes	Acidaminococcales	Acidaminococcaceae	Phascolarctobacterium	Phascolarctobacterium faecium
PE28.bin.70	clu_349	23	2400265	137636	54865	330847	43.42	92.34	98.18	1.5	90.68	Bacteria	Firmicutes	Negativicutes	Acidaminococcales	Acidaminococcaceae	Phascolarctobacterium	Phascolarctobacterium faecium
CN31.bin.54	clu_349	45	2004784	71926	23381	153729	43.19	46.65	86.83	1.7	78.33	Bacteria	Firmicutes	Negativicutes	Acidaminococcales	Acidaminococcaceae	Phascolarctobacterium	Phascolarctobacterium faecium
CN11.bin.75	clu_349	54	1445475	48799	13791	158753	42.56	23.96	73.65	1.5	66.15	Bacteria	Firmicutes	Negativicutes	Acidaminococcales	Acidaminococcaceae	Phascolarctobacterium	Phascolarctobacterium faecium
PE03.bin.12	clu_350	113	1642136	23258	6129	79914	61.26	28.68	70.68	0	70.68	Bacteria	Desulfobacterota	Desulfovibrionia	Desulfovibrionales	Desulfovibrionaceae	Bilophila	Bilophila wadsworthia
PE33.bin.53	clu_350	112	2145633	28932	9553	88652	61.27	38.65	74.22	0	74.22	Bacteria	Desulfobacterota	Desulfovibrionia	Desulfovibrionales	Desulfovibrionaceae	Bilophila	Bilophila wadsworthia
CN33.bin.29	clu_350	479	3182898	8302	3364	46868	61.21	10.53	85.11	0.59	82.16	Bacteria	Desulfobacterota	Desulfovibrionia	Desulfovibrionales	Desulfovibrionaceae	Bilophila	Bilophila wadsworthia
CN22.bin.39	clu_350	249	3220995	17293	6209	86506	60.73	19.73	84.87	0.59	81.92	Bacteria	Desulfobacterota	Desulfovibrionia	Desulfovibrionales	Desulfovibrionaceae	Bilophila	Bilophila wadsworthia
CN28.bin.74	clu_350	273	3525774	17872	5867	109549	60.85	19.3	91.72	0	91.72	Bacteria	Desulfobacterota	Desulfovibrionia	Desulfovibrionales	Desulfovibrionaceae	Bilophila	Bilophila wadsworthia
PE28.bin.44	clu_350	132	3579465	48916	13603	152643	60.58	44.02	91.72	0	91.72	Bacteria	Desulfobacterota	Desulfovibrionia	Desulfovibrionales	Desulfovibrionaceae	Bilophila	Bilophila wadsworthia
CN36.bin.108	clu_350	168	3892201	34608	11030	145667	60.2	18.08	94.08	0	94.08	Bacteria	Desulfobacterota	Desulfovibrionia	Desulfovibrionales	Desulfovibrionaceae	Bilophila	Bilophila wadsworthia
CN17.bin.33	clu_350	287	3474566	16126	5880	67213	60.65	15.41	91.12	0	91.12	Bacteria	Desulfobacterota	Desulfovibrionia	Desulfovibrionales	Desulfovibrionaceae	Bilophila	Bilophila wadsworthia
PE36.bin.52	clu_350	221	3785055	25358	8087	85159	60.47	21.14	93.49	0.79	89.54	Bacteria	Desulfobacterota	Desulfovibrionia	Desulfovibrionales	Desulfovibrionaceae	Bilophila	Bilophila wadsworthia
PE10.bin.31	clu_350	282	3642345	18482	5797	75595	60.79	16.29	91.72	0	91.72	Bacteria	Desulfobacterota	Desulfovibrionia	Desulfovibrionales	Desulfovibrionaceae	Bilophila	Bilophila wadsworthia
PE01.bin.7	clu_350	162	3993003	37327	11646	232426	60.14	24.25	98.22	0	98.22	Bacteria	Desulfobacterota	Desulfovibrionia	Desulfovibrionales	Desulfovibrionaceae	Bilophila	Bilophila wadsworthia
CN31.bin.63	clu_350	111	3503820	51109	14839	262956	59.94	47.72	95.86	0	95.86	Bacteria	Desulfobacterota	Desulfovibrionia	Desulfovibrionales	Desulfovibrionaceae	Bilophila	Bilophila wadsworthia
CN15.bin.30	clu_350	157	4042075	42153	11701	177586	59.73	24.05	91.72	0.59	88.77	Bacteria	Desulfobacterota	Desulfovibrionia	Desulfovibrionales	Desulfovibrionaceae	Bilophila	Bilophila wadsworthia
PE02.bin.24	clu_350	336	3736612	15204	5261	47674	60.58	14.33	96.84	0.68	93.44	Bacteria	Desulfobacterota	Desulfovibrionia	Desulfovibrionales	Desulfovibrionaceae	Bilophila	Bilophila wadsworthia
CN25.bin.64	clu_350	225	3536683	25060	7418	76685	60.65	15.78	86.98	0	86.98	Bacteria	Desulfobacterota	Desulfovibrionia	Desulfovibrionales	Desulfovibrionaceae	Bilophila	Bilophila wadsworthia
CN29.bin.63	clu_350	210	3648018	25076	8175	129501	60.61	23.76	91.12	0	91.12	Bacteria	Desulfobacterota	Desulfovibrionia	Desulfovibrionales	Desulfovibrionaceae	Bilophila	Bilophila wadsworthia
CN19.bin.52	clu_350	358	3520274	13076	4732	128471	60.76	24.72	89.48	0	89.48	Bacteria	Desulfobacterota	Desulfovibrionia	Desulfovibrionales	Desulfovibrionaceae	Bilophila	Bilophila wadsworthia
CN11.bin.35	clu_350	141	3548683	35759	12131	155002	60.48	34.21	91.12	0	91.12	Bacteria	Desulfobacterota	Desulfovibrionia	Desulfovibrionales	Desulfovibrionaceae	Bilophila	Bilophila wadsworthia
CN03.bin.25	clu_350	122	3918726	53301	13680	355830	59.57	35.3	97.04	0	97.04	Bacteria	Desulfobacterota	Desulfovibrionia	Desulfovibrionales	Desulfovibrionaceae	Bilophila	Bilophila wadsworthia
CN12.bin.55	clu_350	321	3909459	17173	6206	71553	60.12	14.04	98.42	1.18	92.52	Bacteria	Desulfobacterota	Desulfovibrionia	Desulfovibrionales	Desulfovibrionaceae	Bilophila	Bilophila wadsworthia
PE12.bin.24	clu_350	146	3775119	41838	12897	171130	60.2	35.77	92.05	0.59	89.1	Bacteria	Desulfobacterota	Desulfovibrionia	Desulfovibrionales	Desulfovibrionaceae	Bilophila	Bilophila wadsworthia
PE08.bin.75	clu_350	416	3552121	10722	4197	48968	60.81	12.15	92.86	0	92.86	Bacteria	Desulfobacterota	Desulfovibrionia	Desulfovibrionales	Desulfovibrionaceae	Bilophila	Bilophila wadsworthia
CN10.bin.64	clu_350	496	3117407	7558	3294	37434	61.51	13.09	85.77	1	80.77	Bacteria	Desulfobacterota	Desulfovibrionia	Desulfovibrionales	Desulfovibrionaceae	Bilophila	Bilophila wadsworthia
CN29.bin.13	clu_351	116	2492304	34329	10753	86962	63.98	13.98	97.51	0.59	94.56	Bacteria	Desulfobacterota	Desulfovibrionia	Desulfovibrionales	Desulfovibrionaceae	Desulfovibrio	Desulfovibrio piger
CN03.bin.23	clu_351	189	2506759	20135	5599	88628	64.06	11.79	94.03	0.59	91.08	Bacteria	Desulfobacterota	Desulfovibrionia	Desulfovibrionales	Desulfovibrionaceae	Desulfovibrio	Unknown
CN12.bin.22	clu_351	195	2394745	18623	5622	63198	64.3	15.59	96.04	1.18	90.14	Bacteria	Desulfobacterota	Desulfovibrionia	Desulfovibrionales	Desulfovibrionaceae	Desulfovibrio	Unknown
PE04.bin.26	clu_351	320	2184399	8868	3277	42971	64.31	9.69	88.61	0.95	83.86	Bacteria	Desulfobacterota	Desulfovibrionia	Desulfovibrionales	Desulfovibrionaceae	Desulfovibrio	Desulfovibrio piger
CN02.bin.42	clu_351	164	2557647	24581	7052	87613	63.94	13.7	98.5	0.95	93.75	Bacteria	Desulfobacterota	Desulfovibrionia	Desulfovibrionales	Desulfovibrionaceae	Desulfovibrio	Unknown
PE08.bin.57	clu_351	165	2480603	20897	7078	80772	64.07	14.67	99.39	0.79	95.44	Bacteria	Desulfobacterota	Desulfovibrionia	Desulfovibrionales	Desulfovibrionaceae	Desulfovibrio	Unknown
CN34.bin.24	clu_351	96	2011037	31948	9972	89869	64.33	14.91	77.4	0.89	72.95	Bacteria	Desulfobacterota	Desulfovibrionia	Desulfovibrionales	Desulfovibrionaceae	Desulfovibrio	Desulfovibrio piger
CN28.bin.24	clu_351	49	2284698	58570	27375	135840	63.71	74.82	83.91	0.89	79.46	Bacteria	Desulfobacterota	Desulfovibrionia	Desulfovibrionales	Desulfovibrionaceae	Desulfovibrio	Unknown
PE23.bin.49	clu_351	306	1881266	7742	2956	38509	65.32	11.23	82.35	1.18	76.45	Bacteria	Desulfobacterota	Desulfovibrionia	Desulfovibrionales	Desulfovibrionaceae	Desulfovibrio	Desulfovibrio piger
PE07.bin.60	clu_352	82	2499653	47278	17332	133544	63.4	19.19	100	0	100	Bacteria	Desulfobacterota	Desulfovibrionia	Desulfovibrionales	Desulfovibrionaceae	Desulfovibrio	Desulfovibrio legallii
CN17.bin.28	clu_353	54	2347827	62740	21931	232182	58.56	20.62	94.35	1.08	88.95	Bacteria	Firmicutes	Clostridia	Christensenellales	CAG-74	SFMI01	Unknown
CN31.bin.34	clu_354	273	1720550	7943	3291	21084	53.6	8.37	83.25	0.67	79.9	Bacteria	Firmicutes	Clostridia	Oscillospirales	Unknown	Unknown	Unknown
CN07.bin.33	clu_355	360	2284700	7658	3393	24173	62.77	10.65	86.72	2.17	75.87	Bacteria	Firmicutes	Clostridia	Christensenellales	CAG-74	Firm-11	Unknown
CN28.bin.11	clu_355	326	2169162	8978	3156	34777	62.89	10.47	87.45	1.48	80.05	Bacteria	Firmicutes	Clostridia	Christensenellales	CAG-74	Firm-11	Unknown
CN08.bin.29	clu_355	109	2901498	49069	10458	157185	61.38	23.82	98.36	1.88	88.96	Bacteria	Firmicutes	Clostridia	Christensenellales	CAG-74	Firm-11	Unknown
CN29.bin.64	clu_355	48	2837637	104989	24719	269801	60.69	20.18	92.34	0.27	90.99	Bacteria	Firmicutes	Clostridia	Christensenellales	CAG-74	Firm-11	Unknown
CN17.bin.99	clu_356	43	2546089	82784	30842	394128	62.57	23.92	89.76	0.27	88.41	Bacteria	Firmicutes	Clostridia	Christensenellales	CAG-74	Firm-11	Unknown
PE38.bin.65	clu_357	261	2328236	11273	4134	87684	58.7	12.98	79.95	0.62	76.85	Bacteria	Firmicutes	Clostridia	Christensenellales	CAG-74	SFFH01	Unknown
PE28.bin.35	clu_357	73	2440953	47355	19204	169293	58.21	18.77	80.55	0	80.55	Bacteria	Firmicutes	Clostridia	Christensenellales	CAG-74	SFFH01	Unknown
PE23.bin.13	clu_357	178	2455651	20757	7272	88777	58.51	26.23	85.68	0.7	82.18	Bacteria	Firmicutes	Clostridia	Christensenellales	CAG-74	SFFH01	Unknown
PE30.bin.24	clu_357	116	2304002	32439	10133	117936	58.57	23.3	83.52	0.17	82.67	Bacteria	Firmicutes	Clostridia	Christensenellales	CAG-74	SFFH01	Unknown
PE04.bin.86	clu_358	337	2389117	9004	3506	30125	60.11	9.88	92.68	2.89	78.23	Bacteria	Firmicutes	Clostridia	Christensenellales	CAG-74	SFFH01	Unknown
PE07.bin.83	clu_358	120	2498453	34230	8827	75776	60.33	17.24	97.58	0.67	94.23	Bacteria	Firmicutes	Clostridia	Christensenellales	CAG-74	SFFH01	Unknown
PE36.bin.58	clu_358	80	2371072	42008	14921	225063	60.25	17.59	97.55	0.23	96.4	Bacteria	Firmicutes	Clostridia	Christensenellales	CAG-74	SFFH01	Unknown
CN05.bin.12	clu_358	137	2500408	28249	8963	99277	60.49	23.15	98.06	0.27	96.71	Bacteria	Firmicutes	Clostridia	Christensenellales	CAG-74	SFFH01	Unknown
CN19.bin.51	clu_358	112	2513908	35176	10885	77856	60.1	32.83	98.39	0.27	97.04	Bacteria	Firmicutes	Clostridia	Christensenellales	CAG-74	SFFH01	Unknown
PE17.bin.43	clu_358	348	2124889	7937	3072	29484	61.53	10.83	83.19	0.35	81.44	Bacteria	Firmicutes	Clostridia	Christensenellales	CAG-74	SFFH01	Unknown
CN27.bin.42	clu_359	167	2849324	24058	8268	113421	58.48	12.62	95.57	1.4	88.57	Bacteria	Firmicutes	Clostridia	Christensenellales	CAG-74	UBA11524	Unknown
PE28.bin.90	clu_359	57	2652073	73703	22884	227617	58.65	47.45	95.1	0.93	90.45	Bacteria	Firmicutes	Clostridia	Christensenellales	CAG-74	UBA11524	Unknown
PE33.bin.32	clu_359	89	2878257	45994	15797	149392	58.36	103.01	97.2	1.17	91.35	Bacteria	Firmicutes	Clostridia	Christensenellales	CAG-74	UBA11524	Unknown
PE17.bin.35	clu_359	80	2941313	49340	20823	172015	58.22	45.37	97.55	1.17	91.7	Bacteria	Firmicutes	Clostridia	Christensenellales	CAG-74	UBA11524	Unknown
CN11.bin.58	clu_359	83	2898410	57756	17317	117718	58.23	43.73	98.25	1.17	92.4	Bacteria	Firmicutes	Clostridia	Christensenellales	CAG-74	UBA11524	Unknown
CN05.bin.31	clu_359	130	3006560	33802	11120	100913	58.33	19.13	98.43	1.17	92.58	Bacteria	Firmicutes	Clostridia	Christensenellales	CAG-74	UBA11524	Unknown
PE07.bin.76	clu_359	209	2898415	20176	6760	76883	58.7	16.36	98.6	1.17	92.75	Bacteria	Firmicutes	Clostridia	Christensenellales	CAG-74	UBA11524	Unknown
CN29.bin.78	clu_360	128	2209074	28017	8017	110251	58.03	11.84	92.71	0.67	89.36	Bacteria	Firmicutes	Clostridia	Oscillospirales	Ruminococcaceae	D5	Unknown
CN11.bin.84	clu_361	256	1397525	6533	2792	25614	50.62	8.42	79.29	3.85	60.04	Bacteria	Proteobacteria	Gammaproteobacteria	Burkholderiales	Burkholderiaceae	Parasutterella	Unknown
CN20.bin.47	clu_361	83	2416637	59848	13410	144090	49.06	24.46	99.37	0.11	98.82	Bacteria	Proteobacteria	Gammaproteobacteria	Burkholderiales	Burkholderiaceae	Parasutterella	Unknown
CN26.bin.33	clu_362	37	2342275	112714	25055	454876	48.91	44.79	97.47	0.11	96.92	Bacteria	Proteobacteria	Gammaproteobacteria	Burkholderiales	Burkholderiaceae	Parasutterella	Parasutterella excrementihominis
CN11.bin.90	clu_363	52	2900915	102032	23904	204369	45.38	106.15	94.76	0.68	91.36	Bacteria	Bacteroidetes	Bacteroidia	Bacteroidales	Bacteroidaceae	Prevotella	Prevotella copri
PE04.bin.19	clu_363	42	2683240	89008	30188	283047	45.9	99.91	87.33	0.17	86.48	Bacteria	Bacteroidetes	Bacteroidia	Bacteroidales	Bacteroidaceae	Prevotella	Prevotella copri
CN25.bin.74	clu_363	61	2899229	70784	22124	202478	45.5	35.32	84.12	1.18	78.22	Bacteria	Bacteroidetes	Bacteroidia	Bacteroidales	Bacteroidaceae	Prevotella	Prevotella copri
CN18.bin.31	clu_363	221	3081318	20681	6454	69710	45.3	118.45	91.15	2.35	79.4	Bacteria	Bacteroidetes	Bacteroidia	Bacteroidales	Bacteroidaceae	Prevotella	Prevotella copri
CN05.bin.64	clu_363	96	2393388	36272	12612	176366	46.11	489.65	78.36	2.86	64.06	Bacteria	Bacteroidetes	Bacteroidia	Bacteroidales	Bacteroidaceae	Prevotella	Prevotella copri
PE23.bin.59	clu_364	214	2809233	18574	6656	56265	46.93	11.6	86.26	1.88	76.86	Bacteria	Bacteroidetes	Bacteroidia	Bacteroidales	Bacteroidaceae	Prevotella	Prevotella copri
CN05.bin.48	clu_365	68	2109447	44867	17394	107409	50.4	23.99	80.19	0.74	76.49	Bacteria	Bacteroidetes	Bacteroidia	Bacteroidales	Bacteroidaceae	Prevotella	Prevotella stercorea
CN21.bin.16	clu_365	114	2259667	26926	9620	116934	49.72	13.3	88.23	0.73	84.58	Bacteria	Bacteroidetes	Bacteroidia	Bacteroidales	Bacteroidaceae	Prevotella	Prevotella stercorea
CN19.bin.18	clu_365	68	1969135	39070	15206	100044	50.01	135.09	72.56	0.56	69.76	Bacteria	Bacteroidetes	Bacteroidia	Bacteroidales	Bacteroidaceae	Prevotella	Prevotella stercorea
CN05.bin.28	clu_366	173	2407881	19851	6709	82608	44.91	21.86	92.69	0	92.69	Bacteria	Bacteroidetes	Bacteroidia	Bacteroidales	Bacteroidaceae	Prevotellamassilia	Unknown
CN26.bin.62	clu_367	103	2016477	32173	9295	170624	39.04	12.98	95.61	0	95.61	Bacteria	Bacteroidetes	Bacteroidia	Bacteroidales	Bacteroidaceae	Prevotella	Prevotella bivia
CN29.bin.90	clu_368	60	3455299	87456	29360	229790	51.5	212.33	94.6	1.19	88.65	Bacteria	Bacteroidetes	Bacteroidia	Bacteroidales	UBA932	RC9	Unknown
PE04.bin.14	clu_369	109	3220392	43706	14190	155298	51.15	39.16	87.65	0.95	82.9	Bacteria	Bacteroidetes	Bacteroidia	Bacteroidales	UBA932	RC9	Unknown
PE28.bin.74	clu_370	340	1837441	5949	2988	30125	59.97	8.74	80.73	1.68	72.33	Bacteria	Bacteroidetes	Bacteroidia	Bacteroidales	Rikenellaceae	Alistipes	Alistipes ihumii
CN06.bin.67	clu_370	311	2137636	9080	3226	48249	59.71	9.04	90.13	0.96	85.33	Bacteria	Bacteroidetes	Bacteroidia	Bacteroidales	Rikenellaceae	Alistipes	Alistipes ihumii
CN22.bin.21	clu_371	371	1633183	4899	2500	16852	56.99	10.12	70.27	0.48	67.87	Bacteria	Bacteroidetes	Bacteroidia	Bacteroidales	Rikenellaceae	Alistipes	Unknown
CN08.bin.32	clu_371	316	2061999	8597	3229	37132	56.9	11.26	85.06	1.84	75.86	Bacteria	Bacteroidetes	Bacteroidia	Bacteroidales	Rikenellaceae	Alistipes	Unknown
PE30.bin.26	clu_371	347	2122515	7497	3141	34961	56.3	8.79	88.61	0.96	83.81	Bacteria	Bacteroidetes	Bacteroidia	Bacteroidales	Rikenellaceae	Alistipes	Unknown
CN34.bin.54	clu_371	279	2361738	10989	4137	35278	56.01	8.6	92.78	0	92.78	Bacteria	Bacteroidetes	Bacteroidia	Bacteroidales	Rikenellaceae	Alistipes	Unknown
PE35.bin.72	clu_371	23	2756847	201157	50023	462193	54.95	38.63	98.56	0.48	96.16	Bacteria	Bacteroidetes	Bacteroidia	Bacteroidales	Rikenellaceae	Alistipes	Unknown
CN06.bin.62	clu_372	42	2256752	95041	23950	164955	54.43	34.42	99.52	0.96	94.72	Bacteria	Bacteroidetes	Bacteroidia	Bacteroidales	Rikenellaceae	Alistipes	Alistipes putredinis
CN28.bin.56	clu_372	23	1962256	117361	50701	309360	54.83	51.62	95.11	1.44	87.91	Bacteria	Bacteroidetes	Bacteroidia	Bacteroidales	Rikenellaceae	Alistipes	Alistipes putredinis
CN03.bin.12	clu_372	23	2193465	171690	38634	415250	54.66	25.4	97.6	0.96	92.8	Bacteria	Bacteroidetes	Bacteroidia	Bacteroidales	Rikenellaceae	Alistipes	Alistipes putredinis
PE08.bin.59	clu_372	31	1972293	85194	28809	195745	55	32.41	95.35	0.96	90.55	Bacteria	Bacteroidetes	Bacteroidia	Bacteroidales	Rikenellaceae	Alistipes	Alistipes putredinis
CN34.bin.77	clu_372	27	2018058	104304	50669	141027	54.68	33.12	93.19	0.96	88.39	Bacteria	Bacteroidetes	Bacteroidia	Bacteroidales	Rikenellaceae	Alistipes	Alistipes putredinis
PE04.bin.24	clu_372	119	2250175	25786	9951	101015	54.82	12.69	97.52	1.84	88.32	Bacteria	Bacteroidetes	Bacteroidia	Bacteroidales	Rikenellaceae	Alistipes	Alistipes putredinis
PE17.bin.79	clu_372	153	1833631	18615	5703	45977	55.78	14.38	94.52	2.32	82.92	Bacteria	Bacteroidetes	Bacteroidia	Bacteroidales	Rikenellaceae	Alistipes	Alistipes putredinis
CN02.bin.62	clu_372	54	1871250	48027	17166	219299	55.36	14.95	94.39	0.96	89.59	Bacteria	Bacteroidetes	Bacteroidia	Bacteroidales	Rikenellaceae	Alistipes	Alistipes putredinis
PE23.bin.23	clu_372	29	2391275	122972	42923	229322	53.91	87.85	99.04	0.96	94.24	Bacteria	Bacteroidetes	Bacteroidia	Bacteroidales	Rikenellaceae	Alistipes	Alistipes putredinis
PE35.bin.82	clu_372	31	2095115	96402	36394	272097	54.68	181.76	96.15	1.44	88.95	Bacteria	Bacteroidetes	Bacteroidia	Bacteroidales	Rikenellaceae	Alistipes	Alistipes putredinis
CN31.bin.11	clu_372	30	1806900	96578	26182	260747	54.82	18.8	79.33	0.96	74.53	Bacteria	Bacteroidetes	Bacteroidia	Bacteroidales	Rikenellaceae	Alistipes	Alistipes putredinis
CN11.bin.18	clu_372	52	2149614	54039	24028	188415	54.57	30.52	99.52	0.96	94.72	Bacteria	Bacteroidetes	Bacteroidia	Bacteroidales	Rikenellaceae	Alistipes	Alistipes putredinis
CN22.bin.52	clu_372	40	2066019	78869	31245	190909	54.8	95.76	96.96	0.99	92.01	Bacteria	Bacteroidetes	Bacteroidia	Bacteroidales	Rikenellaceae	Alistipes	Alistipes putredinis
PE27.bin.65	clu_372	140	1904088	17506	7476	58934	55.38	11	97.12	0.72	93.52	Bacteria	Bacteroidetes	Bacteroidia	Bacteroidales	Rikenellaceae	Alistipes	Alistipes putredinis
CN27.bin.95	clu_372	27	2010241	105337	37055	304442	54.98	23.76	94.71	0.96	89.91	Bacteria	Bacteroidetes	Bacteroidia	Bacteroidales	Rikenellaceae	Alistipes	Alistipes putredinis
PE28.bin.25	clu_372	23	2195255	191062	39254	444619	54.41	90.07	99.52	0.96	94.72	Bacteria	Bacteroidetes	Bacteroidia	Bacteroidales	Rikenellaceae	Alistipes	Alistipes putredinis
PE33.bin.16	clu_372	36	2083186	81606	30400	205791	54.85	63.73	98.56	0.96	93.76	Bacteria	Bacteroidetes	Bacteroidia	Bacteroidales	Rikenellaceae	Alistipes	Alistipes putredinis
PE07.bin.32	clu_372	87	1887591	32397	10237	79737	55.72	32.18	97.3	0.96	92.5	Bacteria	Bacteroidetes	Bacteroidia	Bacteroidales	Rikenellaceae	Alistipes	Alistipes putredinis
PE23.bin.36	clu_373	129	2530079	31302	9381	105906	60.61	31.8	97.63	0.48	95.23	Bacteria	Bacteroidetes	Bacteroidia	Bacteroidales	Rikenellaceae	Alistipes	Alistipes shahii
CN29.bin.52	clu_373	63	2838896	70705	18725	139776	59.74	17.81	93.27	0.48	90.87	Bacteria	Bacteroidetes	Bacteroidia	Bacteroidales	Rikenellaceae	Alistipes	Alistipes shahii
PE33.bin.46	clu_373	117	2513856	30042	10842	99671	60.63	13.52	98.1	0	98.1	Bacteria	Bacteroidetes	Bacteroidia	Bacteroidales	Rikenellaceae	Alistipes	Alistipes shahii
CN22.bin.16	clu_373	92	2670700	48836	13933	139724	60.08	29.41	98.73	0.48	96.33	Bacteria	Bacteroidetes	Bacteroidia	Bacteroidales	Rikenellaceae	Alistipes	Alistipes shahii
CN06.bin.11	clu_373	132	2520014	24166	10830	90948	61.01	24.59	99.52	0.64	96.32	Bacteria	Bacteroidetes	Bacteroidia	Bacteroidales	Rikenellaceae	Alistipes	Alistipes shahii
PE35.bin.65	clu_373	237	2501464	14623	5318	61563	60.6	35.91	88.8	4.81	64.75	Bacteria	Bacteroidetes	Bacteroidia	Bacteroidales	Rikenellaceae	Alistipes	Alistipes shahii
PE28.bin.53	clu_374	52	2711753	76339	26982	225624	58.97	22.32	92.49	0	92.49	Bacteria	Bacteroidetes	Bacteroidia	Bacteroidales	Rikenellaceae	Alistipes	Alistipes finegoldii
PE05.bin.54	clu_374	57	3003801	75971	23513	279438	58.6	21.37	97.12	1.54	89.42	Bacteria	Bacteroidetes	Bacteroidia	Bacteroidales	Rikenellaceae	Alistipes	Alistipes finegoldii
CN17.bin.84	clu_374	429	2687132	7631	3179	42989	60.06	9.78	90.68	2.43	78.53	Bacteria	Bacteroidetes	Bacteroidia	Bacteroidales	Rikenellaceae	Alistipes	Alistipes finegoldii
CN19.bin.31	clu_374	331	2427904	9807	3225	44163	60.38	13.29	88.49	3.71	69.94	Bacteria	Bacteroidetes	Bacteroidia	Bacteroidales	Rikenellaceae	Alistipes	Alistipes finegoldii
PE23.bin.5	clu_375	35	2960748	122121	68296	533265	58.94	48.44	98.77	0.48	96.37	Bacteria	Bacteroidetes	Bacteroidia	Bacteroidales	Rikenellaceae	Alistipes	Alistipes onderdonkii
PE35.bin.18	clu_375	29	3033334	154554	48676	442097	58.99	69.04	97.55	4.81	73.5	Bacteria	Bacteroidetes	Bacteroidia	Bacteroidales	Rikenellaceae	Alistipes	Alistipes onderdonkii
CN06.bin.39	clu_375	390	3062516	10284	3794	51840	60.3	10.17	90.6	2.1	80.1	Bacteria	Bacteroidetes	Bacteroidia	Bacteroidales	Rikenellaceae	Alistipes	Alistipes onderdonkii
CN22.bin.9	clu_375	34	2537118	112956	45747	254789	59.15	81.73	83.37	0.51	80.82	Bacteria	Bacteroidetes	Bacteroidia	Bacteroidales	Rikenellaceae	Alistipes	Alistipes onderdonkii
PE09.bin.111	clu_375	270	2439666	12640	4279	47958	60.34	10.22	84.06	4.33	62.41	Bacteria	Bacteroidetes	Bacteroidia	Bacteroidales	Rikenellaceae	Alistipes	Alistipes onderdonkii
PE07.bin.9	clu_375	272	2309390	11722	4020	65948	60.53	10.87	76.61	0.48	74.21	Bacteria	Bacteroidetes	Bacteroidia	Bacteroidales	Rikenellaceae	Alistipes	Alistipes onderdonkii
CN17.bin.19	clu_376	48	2712644	105796	30167	230386	60.08	19.6	100	0	100	Bacteria	Bacteroidetes	Bacteroidia	Bacteroidales	Rikenellaceae	Alistipes	Alistipes obesi
CN11.bin.60	clu_377	74	3726986	81080	26256	259386	48.41	27.27	97.03	0.37	95.18	Bacteria	Bacteroidetes	Bacteroidia	Bacteroidales	Bacteroidaceae	Paraprevotella	Paraprevotella clara
CN35.bin.69	clu_377	38	3698298	142188	57981	356270	48.33	18.99	95.69	0	95.69	Bacteria	Bacteroidetes	Bacteroidia	Bacteroidales	Bacteroidaceae	Paraprevotella	Paraprevotella clara
CN06.bin.76	clu_377	43	3382886	119283	47091	377654	48.66	30.9	89.74	0.07	89.39	Bacteria	Bacteroidetes	Bacteroidia	Bacteroidales	Bacteroidaceae	Paraprevotella	Paraprevotella clara
PE28.bin.67	clu_378	66	3323687	82292	26310	169906	48.73	26.63	97.55	0	97.55	Bacteria	Bacteroidetes	Bacteroidia	Bacteroidales	Bacteroidaceae	Paraprevotella	Paraprevotella xylaniphila
PE12.bin.57	clu_379	85	4290398	76654	26148	206101	44.82	18.27	89.79	1.09	84.34	Bacteria	Bacteroidetes	Bacteroidia	Bacteroidales	Tannerellaceae	Parabacteroides	Parabacteroides distasonis
PE31.bin.57	clu_379	221	4287622	28978	9534	107415	45.61	10.82	96.38	0.02	96.28	Bacteria	Bacteroidetes	Bacteroidia	Bacteroidales	Tannerellaceae	Parabacteroides	Parabacteroides distasonis
CN02.bin.20	clu_379	89	4421467	73607	25347	154853	45.14	15.05	96.35	0.32	94.75	Bacteria	Bacteroidetes	Bacteroidia	Bacteroidales	Tannerellaceae	Parabacteroides	Parabacteroides distasonis
PE05.bin.22	clu_379	33	4338684	216211	69610	398143	45.13	25.16	96.73	0	96.73	Bacteria	Bacteroidetes	Bacteroidia	Bacteroidales	Tannerellaceae	Parabacteroides	Parabacteroides distasonis
CN26.bin.22	clu_379	44	4768004	145805	57861	321743	44.85	27.13	99.42	0.19	98.47	Bacteria	Bacteroidetes	Bacteroidia	Bacteroidales	Tannerellaceae	Parabacteroides	Parabacteroides distasonis
CN06.bin.84	clu_379	490	3496728	9259	3564	36887	45.8	8.63	87.27	0.96	82.47	Bacteria	Bacteroidetes	Bacteroidia	Bacteroidales	Tannerellaceae	Parabacteroides	Parabacteroides distasonis
CN15.bin.22	clu_379	34	4770911	166440	70295	419824	45.14	53.51	98.85	0	98.85	Bacteria	Bacteroidetes	Bacteroidia	Bacteroidales	Tannerellaceae	Parabacteroides	Parabacteroides distasonis
PE35.bin.3	clu_379	287	3949657	18606	6802	81035	45.67	12.24	90.84	1.35	84.09	Bacteria	Bacteroidetes	Bacteroidia	Bacteroidales	Tannerellaceae	Parabacteroides	Parabacteroides distasonis
CN27.bin.79	clu_379	205	3839501	27551	9166	99662	45.52	10.21	92.25	0.13	91.6	Bacteria	Bacteroidetes	Bacteroidia	Bacteroidales	Tannerellaceae	Parabacteroides	Parabacteroides distasonis
CN33.bin.33	clu_379	499	3770544	10450	3443	53156	45.81	9.44	84.34	1.47	76.99	Bacteria	Bacteroidetes	Bacteroidia	Bacteroidales	Tannerellaceae	Parabacteroides	Parabacteroides distasonis
CN31.bin.13	clu_379	33	3931991	201802	72356	465563	44.92	26.03	81	0	81	Bacteria	Bacteroidetes	Bacteroidia	Bacteroidales	Tannerellaceae	Parabacteroides	Parabacteroides distasonis
PE08.bin.38	clu_379	576	2889557	5745	2726	30229	46.68	8.22	72.85	0.71	69.3	Bacteria	Bacteroidetes	Bacteroidia	Bacteroidales	Tannerellaceae	Parabacteroides	Parabacteroides distasonis
CN31.bin.36	clu_380	334	5341064	25696	7627	85907	43.86	26.37	93.78	1.15	88.03	Bacteria	Bacteroidetes	Bacteroidia	Bacteroidales	Tannerellaceae	Parabacteroides	Parabacteroides goldsteinii
CN29.bin.24	clu_380	298	5867439	31394	9298	118240	43.86	11.79	93.86	2.63	80.71	Bacteria	Bacteroidetes	Bacteroidia	Bacteroidales	Tannerellaceae	Parabacteroides	Parabacteroides goldsteinii
CN17.bin.41	clu_381	46	4058491	123247	50406	298958	45.53	30.63	97.56	2.31	86.01	Bacteria	Bacteroidetes	Bacteroidia	Bacteroidales	Tannerellaceae	Parabacteroides	Parabacteroides merdae
CN21.bin.65	clu_381	403	3591986	12597	4128	82983	45.85	9.37	92.42	4.23	71.27	Bacteria	Bacteroidetes	Bacteroidia	Bacteroidales	Tannerellaceae	Parabacteroides	Parabacteroides merdae
PE08.bin.67	clu_381	470	3377419	9420	3478	36033	46.2	12.13	90.91	2.62	77.81	Bacteria	Bacteroidetes	Bacteroidia	Bacteroidales	Tannerellaceae	Parabacteroides	Parabacteroides merdae
PE17.bin.22	clu_381	378	3813310	13991	4892	82335	45.88	17.05	89.57	3.75	70.82	Bacteria	Bacteroidetes	Bacteroidia	Bacteroidales	Tannerellaceae	Parabacteroides	Parabacteroides merdae
CN02.bin.13	clu_381	49	3995619	189434	41014	323113	45.54	35.81	96.92	0.51	94.37	Bacteria	Bacteroidetes	Bacteroidia	Bacteroidales	Tannerellaceae	Parabacteroides	Parabacteroides merdae
PE33.bin.59	clu_381	46	4185877	156417	54207	376474	45.29	29.7	94.62	0	94.62	Bacteria	Bacteroidetes	Bacteroidia	Bacteroidales	Tannerellaceae	Parabacteroides	Parabacteroides merdae
CN28.bin.46	clu_381	73	4515761	118924	34585	666559	45.28	19.11	94.23	0	94.23	Bacteria	Bacteroidetes	Bacteroidia	Bacteroidales	Tannerellaceae	Parabacteroides	Parabacteroides merdae
PE17.bin.45	clu_382	70	2098068	36608	15840	158897	51.01	15.62	82.45	0.78	78.55	Bacteria	Bacteroidetes	Bacteroidia	Bacteroidales	Muribaculaceae	CAG-279	Unknown
CN19.bin.8	clu_382	63	2110395	47957	17424	167561	50.84	21.68	80.34	0	80.34	Bacteria	Bacteroidetes	Bacteroidia	Bacteroidales	Muribaculaceae	CAG-279	Unknown
PE29.bin.42	clu_382	92	2011465	31633	10520	64271	51.33	15.02	81.95	0	81.95	Bacteria	Bacteroidetes	Bacteroidia	Bacteroidales	Muribaculaceae	CAG-279	Unknown
PE08.bin.9	clu_382	40	2199789	79793	28328	195745	50.57	45.39	88.11	0	88.11	Bacteria	Bacteroidetes	Bacteroidia	Bacteroidales	Muribaculaceae	CAG-279	Unknown
CN11.bin.92	clu_383	284	2193564	9757	3576	41422	53.53	9.21	75.34	1.13	69.69	Bacteria	Bacteroidetes	Bacteroidia	Bacteroidales	Muribaculaceae	CAG-873	Unknown
PE35.bin.80	clu_384	221	2420890	14734	5182	53833	46.76	12.37	79.12	1.82	70.02	Bacteria	Bacteroidetes	Bacteroidia	Bacteroidales	Muribaculaceae	CAG-279	Unknown
PE07.bin.30	clu_385	146	1841520	18108	6093	50328	56.22	16.99	80.05	0.38	78.15	Bacteria	Bacteroidetes	Bacteroidia	Bacteroidales	Muribaculaceae	CAG-1031	Unknown
CN29.bin.35	clu_386	20	2405283	236161	65577	298769	43.26	27.09	70.69	0	70.69	Bacteria	Bacteroidetes	Bacteroidia	Bacteroidales	Barnesiellaceae	Barnesiella	Barnesiella intestinihominis
CN27.bin.66	clu_386	391	2296511	6975	3262	25525	43.57	7.42	76.49	0.75	72.74	Bacteria	Bacteroidetes	Bacteroidia	Bacteroidales	Barnesiellaceae	Barnesiella	Barnesiella intestinihominis
CN11.bin.12	clu_386	300	2713158	13472	4116	43947	43.58	9.31	91.51	0.14	90.81	Bacteria	Bacteroidetes	Bacteroidia	Bacteroidales	Barnesiellaceae	Barnesiella	Barnesiella intestinihominis
PE30.bin.5	clu_387	75	2138523	50939	13474	208332	57.05	12.65	93.27	0.64	90.07	Bacteria	Bacteroidetes	Bacteroidia	Bacteroidales	Rikenellaceae	Tidjanibacter	Tidjanibacter inops
PE08.bin.23	clu_388	302	3528081	17566	5225	61414	40.56	14.71	92.37	0.82	88.27	Bacteria	Bacteroidetes	Bacteroidia	Bacteroidales	Bacteroidaceae	Phocaeicola	Phocaeicola coprocola
PE12.bin.7	clu_388	120	3269927	47355	12006	122498	40.38	56.22	89.76	0.93	85.11	Bacteria	Bacteroidetes	Bacteroidia	Bacteroidales	Bacteroidaceae	Phocaeicola	Phocaeicola coprocola
CN23.bin.9	clu_388	249	3143955	28276	4524	104608	40.29	16.11	76.29	1.01	71.24	Bacteria	Bacteroidetes	Bacteroidia	Bacteroidales	Bacteroidaceae	Phocaeicola	Phocaeicola coprocola
CN36.bin.84	clu_388	68	2085331	57702	15519	218437	40.4	70.12	70.09	0.19	69.14	Bacteria	Bacteroidetes	Bacteroidia	Bacteroidales	Bacteroidaceae	Phocaeicola	Phocaeicola coprocola
CN17.bin.20	clu_388	69	2926580	67032	24562	174409	40.88	19.48	88.41	1.24	82.21	Bacteria	Bacteroidetes	Bacteroidia	Bacteroidales	Bacteroidaceae	Phocaeicola	Unknown
CN27.bin.16	clu_389	65	3058526	71886	23298	164899	43.89	41.38	80.1	0.63	76.95	Bacteria	Bacteroidetes	Bacteroidia	Bacteroidales	Bacteroidaceae	Phocaeicola	Phocaeicola plebeius
CN20.bin.60	clu_389	40	2831849	111109	53010	259397	44.76	46.36	78.23	1.49	70.78	Bacteria	Bacteroidetes	Bacteroidia	Bacteroidales	Bacteroidaceae	Phocaeicola	Phocaeicola plebeius
CN31.bin.48	clu_389	119	3104529	46960	12869	148031	44.76	59.32	91.73	0.67	88.38	Bacteria	Bacteroidetes	Bacteroidia	Bacteroidales	Bacteroidaceae	Phocaeicola	Phocaeicola plebeius
CN19.bin.26	clu_389	104	2827229	43506	14456	112191	44.57	21.16	81.22	2.74	67.52	Bacteria	Bacteroidetes	Bacteroidia	Bacteroidales	Bacteroidaceae	Phocaeicola	Phocaeicola plebeius
PE08.bin.76	clu_389	34	2952375	124361	56161	206835	44.51	40.57	83.26	0.19	82.31	Bacteria	Bacteroidetes	Bacteroidia	Bacteroidales	Bacteroidaceae	Phocaeicola	Phocaeicola plebeius
CN11.bin.83	clu_389	193	2736500	22364	6396	89047	44.52	57.9	72.41	1.72	63.81	Bacteria	Bacteroidetes	Bacteroidia	Bacteroidales	Bacteroidaceae	Phocaeicola	Phocaeicola plebeius
CN36.bin.105	clu_389	170	2650749	23137	7073	89865	45.09	122.03	77.97	2.25	66.72	Bacteria	Bacteroidetes	Bacteroidia	Bacteroidales	Bacteroidaceae	Phocaeicola	Phocaeicola plebeius
CN11.bin.54	clu_390	142	2461424	27096	7772	70078	47.96	11.58	75.86	0	75.86	Bacteria	Bacteroidetes	Bacteroidia	Bacteroidales	Bacteroidaceae	Phocaeicola	Phocaeicola barnesiae
PE35.bin.51	clu_391	79	2807109	59562	17783	251644	46.29	59.94	84.56	1.06	79.26	Bacteria	Bacteroidetes	Bacteroidia	Bacteroidales	Bacteroidaceae	Phocaeicola	Phocaeicola coprophilus
CN17.bin.81	clu_392	37	4770309	174152	67502	656294	43.31	91.71	97.12	0	97.12	Bacteria	Bacteroidetes	Bacteroidia	Bacteroidales	Bacteroidaceae	Bacteroides	Bacteroides fragilis
CN33.bin.35	clu_392	34	4715887	172793	74888	641787	43.24	37.98	97.03	2.97	82.18	Bacteria	Bacteroidetes	Bacteroidia	Bacteroidales	Bacteroidaceae	Bacteroides	Bacteroides fragilis
PE15.bin.27	clu_392	368	4547561	21932	5016	89783	44.01	11.03	95.72	1.49	88.27	Bacteria	Bacteroidetes	Bacteroidia	Bacteroidales	Bacteroidaceae	Bacteroides	Bacteroides fragilis
PE24.bin.22	clu_392	355	4182552	18460	5250	81952	44.36	16.98	93.94	2.79	79.99	Bacteria	Bacteroidetes	Bacteroidia	Bacteroidales	Bacteroidaceae	Bacteroides	Bacteroides fragilis
CN14.bin.32	clu_392	32	4926655	255682	84791	544974	43.18	59.6	98.4	0	98.4	Bacteria	Bacteroidetes	Bacteroidia	Bacteroidales	Bacteroidaceae	Bacteroides	Bacteroides fragilis
CN24.bin.10	clu_392	40	5184191	281462	94439	551308	43.33	36.67	81.38	3.45	64.13	Bacteria	Bacteroidetes	Bacteroidia	Bacteroidales	Bacteroidaceae	Bacteroides	Bacteroides fragilis
CN03.bin.11	clu_393	35	4826729	273363	105841	477825	43.33	46.92	98.79	0	98.79	Bacteria	Bacteroidetes	Bacteroidia	Bacteroidales	Bacteroidaceae	Bacteroides	Bacteroides fragilis
PE05.bin.8	clu_394	99	6038373	113013	29547	314316	42.61	46.45	98.2	2.12	87.6	Bacteria	Bacteroidetes	Bacteroidia	Bacteroidales	Bacteroidaceae	Bacteroides	Bacteroides thetaiotaomicron
CN26.bin.49	clu_394	173	5444248	47726	17526	194359	42.99	24.21	77.59	1.72	68.99	Bacteria	Bacteroidetes	Bacteroidia	Bacteroidales	Bacteroidaceae	Bacteroides	Bacteroides thetaiotaomicron
PE28.bin.7	clu_395	103	5125326	84827	25183	257334	42.56	30.9	72.41	0.86	68.11	Bacteria	Bacteroidetes	Bacteroidia	Bacteroidales	Bacteroidaceae	Bacteroides	Bacteroides faecis
CN03.bin.22	clu_396	76	4043948	82205	28296	363549	42	23.73	77.07	4.31	55.52	Bacteria	Bacteroidetes	Bacteroidia	Bacteroidales	Bacteroidaceae	Bacteroides	Bacteroides caccae
CN17.bin.61	clu_396	69	4396669	111787	31546	422568	42.21	25.95	89.77	3.69	71.32	Bacteria	Bacteroidetes	Bacteroidia	Bacteroidales	Bacteroidaceae	Bacteroides	Bacteroides caccae
PE28.bin.28	clu_396	260	4785897	30395	8259	129292	42.29	15.18	88.07	2.78	74.17	Bacteria	Bacteroidetes	Bacteroidia	Bacteroidales	Bacteroidaceae	Bacteroides	Bacteroides caccae
CN35.bin.13	clu_397	363	5658574	25099	7192	91166	41.45	42.76	85.56	0.79	81.61	Bacteria	Bacteroidetes	Bacteroidia	Bacteroidales	Bacteroidaceae	Bacteroides	Bacteroides ovatus
CN37.bin.41	clu_397	63	5984708	166764	49084	550235	41.68	50.8	92.1	0.2	91.1	Bacteria	Bacteroidetes	Bacteroidia	Bacteroidales	Bacteroidaceae	Bacteroides	Bacteroides ovatus
CN03.bin.54	clu_397	123	5715561	93023	22893	290195	41.88	88.49	91.95	1.86	82.65	Bacteria	Bacteroidetes	Bacteroidia	Bacteroidales	Bacteroidaceae	Bacteroides	Bacteroides ovatus
CN26.bin.66	clu_398	81	6207653	157958	38825	409479	41.57	164.8	95.55	0.76	91.75	Bacteria	Bacteroidetes	Bacteroidia	Bacteroidales	Bacteroidaceae	Bacteroides	Unknown
PE33.bin.65	clu_399	202	5393521	44729	12747	194180	41.8	76.18	97.74	3.7	79.24	Bacteria	Bacteroidetes	Bacteroidia	Bacteroidales	Bacteroidaceae	Phocaeicola	Phocaeicola dorei
CN03.bin.14	clu_399	50	4870990	145708	65736	322879	41.67	136.98	93.23	1.48	85.83	Bacteria	Bacteroidetes	Bacteroidia	Bacteroidales	Bacteroidaceae	Phocaeicola	Phocaeicola dorei
CN11.bin.81	clu_399	228	5676767	58167	10618	156107	40.91	36.72	89.17	4.89	64.72	Bacteria	Bacteroidetes	Bacteroidia	Bacteroidales	Bacteroidaceae	Phocaeicola	Phocaeicola dorei
PE31.bin.7	clu_400	147	3684095	41847	11551	105478	42.31	83.44	88.3	0.19	87.35	Bacteria	Bacteroidetes	Bacteroidia	Bacteroidales	Bacteroidaceae	Phocaeicola	Phocaeicola vulgatus
CN33.bin.11	clu_400	68	4521331	120867	38131	426570	42.18	80.51	89.1	1.13	83.45	Bacteria	Bacteroidetes	Bacteroidia	Bacteroidales	Bacteroidaceae	Phocaeicola	Phocaeicola vulgatus
CN34.bin.75	clu_400	77	4512540	106333	28379	271321	41.82	172.3	89.81	1.32	83.21	Bacteria	Bacteroidetes	Bacteroidia	Bacteroidales	Bacteroidaceae	Phocaeicola	Phocaeicola vulgatus
PE10.bin.12	clu_400	697	3813761	6536	2721	40628	42.21	9.7	76.02	4.66	52.72	Bacteria	Bacteroidetes	Bacteroidia	Bacteroidales	Bacteroidaceae	Phocaeicola	Phocaeicola vulgatus
PE35.bin.39	clu_400	131	4390944	53262	15870	135331	41.93	130.59	76.44	3.45	59.19	Bacteria	Bacteroidetes	Bacteroidia	Bacteroidales	Bacteroidaceae	Phocaeicola	Phocaeicola vulgatus
PE26.bin.34	clu_400	216	4535744	33894	10203	212461	42.16	13.51	91.65	0.56	88.85	Bacteria	Bacteroidetes	Bacteroidia	Bacteroidales	Bacteroidaceae	Phocaeicola	Phocaeicola vulgatus
CN19.bin.24	clu_400	91	4386803	88047	24655	274838	41.76	136.71	70.69	1.72	62.09	Bacteria	Bacteroidetes	Bacteroidia	Bacteroidales	Bacteroidaceae	Phocaeicola	Phocaeicola vulgatus
CN26.bin.58	clu_400	56	4242016	131219	41157	245034	41.83	318.79	92.25	0.94	87.55	Bacteria	Bacteroidetes	Bacteroidia	Bacteroidales	Bacteroidaceae	Phocaeicola	Phocaeicola vulgatus
PE03.bin.42	clu_400	94	4542748	74490	25134	225161	42.13	41.53	74.14	0	74.14	Bacteria	Bacteroidetes	Bacteroidia	Bacteroidales	Bacteroidaceae	Phocaeicola	Phocaeicola vulgatus
CN29.bin.25	clu_400	179	5213318	71611	12644	260926	41.93	14.8	96.98	4.05	76.73	Bacteria	Bacteroidetes	Bacteroidia	Bacteroidales	Bacteroidaceae	Phocaeicola	Phocaeicola vulgatus
PE05.bin.62	clu_401	61	4788426	127793	40275	261088	43.75	45.59	96.8	0.94	92.1	Bacteria	Bacteroidetes	Bacteroidia	Bacteroidales	Bacteroidaceae	Phocaeicola	Phocaeicola sartorii
PE03.bin.39	clu_402	256	3539019	21189	5987	109821	42.58	13.24	90.26	0.54	87.56	Bacteria	Bacteroidetes	Bacteroidia	Bacteroidales	Bacteroidaceae	Phocaeicola	Phocaeicola massiliensis
CN17.bin.22	clu_403	50	4238254	135781	44295	401415	46.47	55.14	97.4	1.31	90.85	Bacteria	Bacteroidetes	Bacteroidia	Bacteroidales	Bacteroidaceae	Bacteroides	Bacteroides uniformis
CN21.bin.56	clu_403	97	3779821	59164	21081	150327	47.11	32.54	92.18	0.56	89.38	Bacteria	Bacteroidetes	Bacteroidia	Bacteroidales	Bacteroidaceae	Bacteroides	Bacteroides uniformis
CN01.bin.20	clu_403	76	4032270	91563	25899	296826	47.2	19.23	90.57	0.56	87.77	Bacteria	Bacteroidetes	Bacteroidia	Bacteroidales	Bacteroidaceae	Bacteroides	Bacteroides uniformis
PE33.bin.19	clu_403	41	4382849	195092	69797	455265	46.38	24.03	97.03	0	97.03	Bacteria	Bacteroidetes	Bacteroidia	Bacteroidales	Bacteroidaceae	Bacteroides	Bacteroides uniformis
CN34.bin.83	clu_403	150	3243165	32053	11045	123120	47.41	293.95	71.72	0	71.72	Bacteria	Bacteroidetes	Bacteroidia	Bacteroidales	Bacteroidaceae	Bacteroides	Bacteroides uniformis
PE28.bin.41	clu_403	218	3864333	27679	8282	103265	47.31	18.98	77.07	0.86	72.77	Bacteria	Bacteroidetes	Bacteroidia	Bacteroidales	Bacteroidaceae	Bacteroides	Bacteroides uniformis
PE23.bin.75	clu_403	305	3388608	17157	4984	77927	47.82	10.5	86.52	3.93	66.87	Bacteria	Bacteroidetes	Bacteroidia	Bacteroidales	Bacteroidaceae	Bacteroides	Bacteroides uniformis
CN26.bin.85	clu_403	42	4182901	118367	62080	289078	46.67	242.11	84.83	3.45	67.58	Bacteria	Bacteroidetes	Bacteroidia	Bacteroidales	Bacteroidaceae	Bacteroides	Bacteroides uniformis
CN23.bin.18	clu_403	155	3785572	41251	12996	101067	47.51	20.08	97.7	1.24	91.5	Bacteria	Bacteroidetes	Bacteroidia	Bacteroidales	Bacteroidaceae	Bacteroides	Bacteroides uniformis
CN15.bin.13	clu_403	398	3441614	10891	4510	40646	47.15	10.21	79.48	0	79.48	Bacteria	Bacteroidetes	Bacteroidia	Bacteroidales	Bacteroidaceae	Bacteroides	Bacteroides uniformis
PE08.bin.4	clu_403	48	4150770	155460	51772	310317	46.47	58.46	94.44	3.56	76.64	Bacteria	Bacteroidetes	Bacteroidia	Bacteroidales	Bacteroidaceae	Bacteroides	Bacteroides uniformis
CN14.bin.6	clu_403	17	4424835	452843	152234	724713	46.6	104.8	98.88	0.37	97.03	Bacteria	Bacteroidetes	Bacteroidia	Bacteroidales	Bacteroidaceae	Bacteroides	Bacteroides uniformis
CN12.bin.16	clu_403	54	3600884	219960	31905	396484	47.11	25.33	85.21	1.12	79.61	Bacteria	Bacteroidetes	Bacteroidia	Bacteroidales	Bacteroidaceae	Bacteroides	Bacteroides uniformis
CN02.bin.11	clu_403	207	3387513	29168	7254	155202	47.34	135.89	87.49	0.68	84.09	Bacteria	Bacteroidetes	Bacteroidia	Bacteroidales	Bacteroidaceae	Bacteroides	Bacteroides uniformis
PE04.bin.25	clu_403	74	4072764	81005	26890	188059	46.72	21.39	95.32	2.34	83.62	Bacteria	Bacteroidetes	Bacteroidia	Bacteroidales	Bacteroidaceae	Bacteroides	Bacteroides uniformis
CN35.bin.18	clu_403	25	4121527	378600	75314	732414	46.62	34.06	92.57	0.37	90.72	Bacteria	Bacteroidetes	Bacteroidia	Bacteroidales	Bacteroidaceae	Bacteroides	Bacteroides uniformis
CN03.bin.62	clu_403	32	4061049	227429	58557	483729	46.23	73.63	89.22	0	89.22	Bacteria	Bacteroidetes	Bacteroidia	Bacteroidales	Bacteroidaceae	Bacteroides	Bacteroides uniformis
PE36.bin.61	clu_403	243	3333044	20632	6634	70475	47.99	12.76	91.46	0.5	88.96	Bacteria	Bacteroidetes	Bacteroidia	Bacteroidales	Bacteroidaceae	Bacteroides	Bacteroides uniformis
PE05.bin.33	clu_403	42	4111369	150056	46408	552142	46.57	106.08	94.87	0.74	91.17	Bacteria	Bacteroidetes	Bacteroidia	Bacteroidales	Bacteroidaceae	Bacteroides	Bacteroides uniformis
CN36.bin.23	clu_403	48	4109812	173085	62093	490519	46.42	22.32	94.05	2.33	82.4	Bacteria	Bacteroidetes	Bacteroidia	Bacteroidales	Bacteroidaceae	Bacteroides	Bacteroides uniformis
CN20.bin.16	clu_403	75	4023976	117369	38014	330836	46.89	28.3	92.57	4.04	72.37	Bacteria	Bacteroidetes	Bacteroidia	Bacteroidales	Bacteroidaceae	Bacteroides	Bacteroides uniformis
PE20.bin.26	clu_403	395	3942738	16358	4197	82564	47	9.73	90.51	4.3	69.01	Bacteria	Bacteroidetes	Bacteroidia	Bacteroidales	Bacteroidaceae	Bacteroides	Bacteroides uniformis
CN37.bin.7	clu_404	34	3029106	126460	63989	360727	46.29	44.1	89.59	0	89.59	Bacteria	Bacteroidetes	Bacteroidia	Bacteroidales	Bacteroidaceae	Bacteroides	Bacteroides stercoris
PE12.bin.45	clu_404	64	2766701	70250	26315	156858	46.9	21.49	80.35	0.21	79.3	Bacteria	Bacteroidetes	Bacteroidia	Bacteroidales	Bacteroidaceae	Bacteroides	Bacteroides stercoris
CN02.bin.21	clu_404	50	2937032	92928	35445	221866	46.24	26.14	86.63	3.35	69.88	Bacteria	Bacteroidetes	Bacteroidia	Bacteroidales	Bacteroidaceae	Bacteroides	Bacteroides stercoris
CN12.bin.10	clu_404	90	3326925	61450	20814	195203	46.21	73.44	96.09	0.43	93.94	Bacteria	Bacteroidetes	Bacteroidia	Bacteroidales	Bacteroidaceae	Bacteroides	Bacteroides stercoris
CN06.bin.73	clu_404	56	3051964	108540	29294	239364	46.43	23.96	72.76	0.86	68.46	Bacteria	Bacteroidetes	Bacteroidia	Bacteroidales	Bacteroidaceae	Bacteroides	Bacteroides stercoris
PE28.bin.61	clu_404	68	2691252	63170	18864	188855	46.62	47.5	78.27	4.23	57.12	Bacteria	Bacteroidetes	Bacteroidia	Bacteroidales	Bacteroidaceae	Bacteroides	Bacteroides stercoris
CN28.bin.17	clu_405	89	3265963	53769	21322	270561	48.77	15.89	88.86	0.74	85.16	Bacteria	Bacteroidetes	Bacteroidia	Bacteroidales	Bacteroidaceae	Bacteroides	Bacteroides ndongoniae
PE26.bin.69	clu_406	49	2528227	86184	25670	308477	58.71	19.14	93.96	1.38	87.06	Bacteria	Desulfobacterota	Desulfovibrionia	Desulfovibrionales	Desulfovibrionaceae	Desulfovibrio	Unknown
