# Supplementary material for: Deep metagenomic characterization of gut microbial community and function in preeclampsia
Source: Front Cell Infect Microbiol. 2022 Sep 14;12:933523. doi: 10.3389/fcimb.2022.933523 (PMC9515455; doi:10.3389/fcimb.2022.933523)
Supplement: Supplementary file 3 [file Table_3.xlsx]

## Sheet: ST3
Table S3| Detailed information of 406 species.
Cluster ID	Number of MAGs	Species ID	Species name	Domain	Phylum	Class	Order	Famiy	Genus	Species	Best UHGG reference ID	Best UHGG reference name	% ANI
clu_1	8	M001	Lacticaseibacillus paracasei M001	Bacteria	Firmicutes	Bacilli	Lactobacillales	Lactobacillaceae	Lacticaseibacillus	Lacticaseibacillus paracasei	GUT_GENOME142483	Lactobacillus_C paracasei_GUT_GENOME142483	98.5
clu_2	1	M002	Lacticaseibacillus rhamnosus M002	Bacteria	Firmicutes	Bacilli	Lactobacillales	Lactobacillaceae	Lacticaseibacillus	Lacticaseibacillus rhamnosus	GUT_GENOME095939	Lactobacillus_C rhamnosus_GUT_GENOME095939	98.3
clu_3	1	M003	Limosilactobacillus vaginalis M003	Bacteria	Firmicutes	Bacilli	Lactobacillales	Lactobacillaceae	Limosilactobacillus	Limosilactobacillus vaginalis	GUT_GENOME000067	Lactobacillus_H vaginalis_A_GUT_GENOME000067	99.3
clu_4	1	M004	Lactiplantibacillus pentosus M004	Bacteria	Firmicutes	Bacilli	Lactobacillales	Lactobacillaceae	Lactiplantibacillus	Lactiplantibacillus pentosus	GUT_GENOME167947	Lactobacillus_F pentosus_GUT_GENOME167947	99.8
clu_5	5	M005	Limosilactobacillus fermentum M005	Bacteria	Firmicutes	Bacilli	Lactobacillales	Lactobacillaceae	Limosilactobacillus	Limosilactobacillus fermentum	GUT_GENOME000862	Lactobacillus_H fermentum_GUT_GENOME000862	98.8
clu_6	1	M006	Limosilactobacillus mucosae M006	Bacteria	Firmicutes	Bacilli	Lactobacillales	Lactobacillaceae	Limosilactobacillus	Limosilactobacillus mucosae	GUT_GENOME140701	Lactobacillus_H mucosae_GUT_GENOME140701	97.1
clu_7	1	M007	Limosilactobacillus pontis M007	Bacteria	Firmicutes	Bacilli	Lactobacillales	Lactobacillaceae	Limosilactobacillus	Limosilactobacillus pontis	GUT_GENOME096522	Lactobacillus_H antri_GUT_GENOME096522	79.6
clu_8	1	M008	Lactococcus lactis M008	Bacteria	Firmicutes	Bacilli	Lactobacillales	Streptococcaceae	Lactococcus	Lactococcus lactis	GUT_GENOME001355	Lactococcus lactis_GUT_GENOME001355	87.6
clu_9	1	M009	Lactococcus lactis M009	Bacteria	Firmicutes	Bacilli	Lactobacillales	Streptococcaceae	Lactococcus	Lactococcus lactis	GUT_GENOME027596	Lactococcus lactis_E_GUT_GENOME027596	98.5
clu_10	1	M010	Lactococcus garvieae M010	Bacteria	Firmicutes	Bacilli	Lactobacillales	Streptococcaceae	Lactococcus	Lactococcus garvieae	GUT_GENOME066135	Lactococcus garvieae_B_GUT_GENOME066135	99.2
clu_11	7	M011	Streptococcus pasteurianus M011	Bacteria	Firmicutes	Bacilli	Lactobacillales	Streptococcaceae	Streptococcus	Streptococcus pasteurianus	GUT_GENOME001519	Streptococcus pasteurianus_GUT_GENOME001519	98.8
clu_12	2	M012	Streptococcus infantarius M012	Bacteria	Firmicutes	Bacilli	Lactobacillales	Streptococcaceae	Streptococcus	Streptococcus infantarius	GUT_GENOME095981	Streptococcus infantarius_GUT_GENOME095981	98.4
clu_13	1	M013	Streptococcus sp. M013	Bacteria	Firmicutes	Bacilli	Lactobacillales	Streptococcaceae	Streptococcus	Unknown	GUT_GENOME230915	Streptococcus sp002300045_GUT_GENOME230915	98.7
clu_14	3	M014	Streptococcus parasanguinis M014	Bacteria	Firmicutes	Bacilli	Lactobacillales	Streptococcaceae	Streptococcus	Streptococcus parasanguinis	GUT_GENOME001139	Streptococcus parasanguinis_B_GUT_GENOME001139	96.1
clu_15	4	M015	Streptococcus thermophilus M015	Bacteria	Firmicutes	Bacilli	Lactobacillales	Streptococcaceae	Streptococcus	Streptococcus thermophilus	GUT_GENOME268665	Streptococcus thermophilus_GUT_GENOME268665	99.4
clu_16	8	M016	Streptococcus salivarius M016	Bacteria	Firmicutes	Bacilli	Lactobacillales	Streptococcaceae	Streptococcus	Streptococcus salivarius	GUT_GENOME000571	Streptococcus salivarius_GUT_GENOME000571	97
clu_17	4	M017	Weissella confusa M017	Bacteria	Firmicutes	Bacilli	Lactobacillales	Lactobacillaceae	Weissella	Weissella confusa	GUT_GENOME000743	Weissella confusa_GUT_GENOME000743	99.5
clu_18	2	M018	Weissella cibaria M018	Bacteria	Firmicutes	Bacilli	Lactobacillales	Lactobacillaceae	Weissella	Weissella cibaria	GUT_GENOME001573	Weissella cibaria_GUT_GENOME001573	98.3
clu_19	1	M019	Pediococcus acidilactici M019	Bacteria	Firmicutes	Bacilli	Lactobacillales	Lactobacillaceae	Pediococcus	Pediococcus acidilactici	GUT_GENOME095943	Pediococcus acidilactici_GUT_GENOME095943	97.3
clu_20	1	M020	Leuconostoc lactis M020	Bacteria	Firmicutes	Bacilli	Lactobacillales	Lactobacillaceae	Leuconostoc	Leuconostoc lactis	GUT_GENOME225852	Leuconostoc lactis_B_GUT_GENOME225852	97.8
clu_21	1	M021	Pediococcus pentosaceus M021	Bacteria	Firmicutes	Bacilli	Lactobacillales	Lactobacillaceae	Pediococcus	Pediococcus pentosaceus	GUT_GENOME142050	Pediococcus pentosaceus_GUT_GENOME142050	98.6
clu_22	1	M022	Weissella paramesenteroides M022	Bacteria	Firmicutes	Bacilli	Lactobacillales	Lactobacillaceae	Weissella	Weissella paramesenteroides	GUT_GENOME096070	Weissella paramesenteroides_GUT_GENOME096070	98.1
clu_23	1	M023	Sporosarcina sp. M023	Bacteria	Firmicutes	Bacilli	Bacillales	Planococcaceae	Sporosarcina	Unknown	GUT_GENOME272874	Enterococcus_B hirae_GUT_GENOME272874	81.3
clu_24	1	M024	Fusobacterium ulcerans M024	Bacteria	Firmicutes	Fusobacteriia	Fusobacteriales	Fusobacteriaceae	Fusobacterium	Fusobacterium ulcerans	GUT_GENOME096033	Fusobacterium_A ulcerans_GUT_GENOME096033	98.4
clu_25	2	M025	Enterococcus asini M025	Bacteria	Firmicutes	Bacilli	Lactobacillales	Enterococcaceae	Enterococcus	Enterococcus asini	GUT_GENOME000812	Enterococcus_C asini_GUT_GENOME000812	97.1
clu_26	1	M026	Negativibacillus massiliensis M026	Bacteria	Firmicutes	Clostridia	Oscillospirales	Ruminococcaceae	Negativibacillus	Negativibacillus massiliensis	GUT_GENOME155713	Negativibacillus massiliensis_GUT_GENOME155713	96.4
clu_27	2	M027	Enterococcus faecalis M027	Bacteria	Firmicutes	Bacilli	Lactobacillales	Enterococcaceae	Enterococcus	Enterococcus faecalis	GUT_GENOME103721	Enterococcus faecalis_GUT_GENOME103721	98.6
clu_28	2	M028	Enterococcus faecium M028	Bacteria	Firmicutes	Bacilli	Lactobacillales	Enterococcaceae	Enterococcus	Enterococcus faecium	GUT_GENOME140713	Enterococcus_B faecium_B_GUT_GENOME140713	97.8
clu_29	1	M029	Enterococcus sp. M029	Bacteria	Firmicutes	Bacilli	Lactobacillales	Enterococcaceae	Enterococcus	Unknown	GUT_GENOME140713	Enterococcus_B faecium_B_GUT_GENOME140713	82.2
clu_30	1	M030	Enterococcus hirae M030	Bacteria	Firmicutes	Bacilli	Lactobacillales	Enterococcaceae	Enterococcus	Enterococcus hirae	GUT_GENOME272874	Enterococcus_B hirae_GUT_GENOME272874	98.5
clu_31	2	M031	Enterococcus gallinarum M031	Bacteria	Firmicutes	Bacilli	Lactobacillales	Enterococcaceae	Enterococcus	Enterococcus gallinarum	GUT_GENOME000558	Enterococcus_D gallinarum_GUT_GENOME000558	99.5
clu_32	1	M032	Lactobacillus johnsonii M032	Bacteria	Firmicutes	Bacilli	Lactobacillales	Lactobacillaceae	Lactobacillus	Lactobacillus johnsonii	GUT_GENOME000022	Lactobacillus johnsonii_GUT_GENOME000022	96.4
clu_33	1	M033	Lactobacillus paragasseri M033	Bacteria	Firmicutes	Bacilli	Lactobacillales	Lactobacillaceae	Lactobacillus	Lactobacillus paragasseri	GUT_GENOME142482	Lactobacillus gasseri_A_GUT_GENOME142482	99.6
clu_34	1	M034	Veillonella parvula M034	Bacteria	Firmicutes	Negativicutes	Veillonellales	Veillonellaceae	Veillonella	Veillonella parvula	GUT_GENOME096096	Veillonella parvula_A_GUT_GENOME096096	97.6
clu_35	4	M035	Acetatifactor sp. M035	Bacteria	Firmicutes	Clostridia	Lachnospirales	Lachnospiraceae	Acetatifactor	Unknown	GUT_GENOME000166	Acetatifactor sp900066365_GUT_GENOME000166	97.1
clu_36	3	M036	Acetatifactor sp. M036	Bacteria	Firmicutes	Clostridia	Lachnospirales	Lachnospiraceae	Acetatifactor	Unknown	GUT_GENOME001297	Acetatifactor sp900066565_GUT_GENOME001297	97.9
clu_37	3	M037	Coprococcus sp. M037	Bacteria	Firmicutes	Clostridia	Lachnospirales	Lachnospiraceae	Coprococcus	Unknown	GUT_GENOME001027	Coprococcus sp900066115_GUT_GENOME001027	98.5
clu_38	2	M038	Coprococcus eutactus M038	Bacteria	Firmicutes	Clostridia	Lachnospirales	Lachnospiraceae	Coprococcus	Coprococcus eutactus	GUT_GENOME000055	Coprococcus eutactus_GUT_GENOME000055	98.4
clu_39	3	M039	Coprococcus eutactus M039	Bacteria	Firmicutes	Clostridia	Lachnospirales	Lachnospiraceae	Coprococcus	Coprococcus eutactus	GUT_GENOME001379	Coprococcus eutactus_A_GUT_GENOME001379	98.4
clu_40	3	M040	TF01-11 sp. M040	Bacteria	Firmicutes	Clostridia	Lachnospirales	Lachnospiraceae	TF01-11	Unknown	GUT_GENOME140296	TF01-11 sp003529475_GUT_GENOME140296	98.7
clu_41	3	M041	CAG-127 sp. M041	Bacteria	Firmicutes	Clostridia	Lachnospirales	Lachnospiraceae	CAG-127	Unknown	GUT_GENOME001029	CAG-127 sp900319515_GUT_GENOME001029	98.1
clu_42	3	M042	Clostridium sp. M042	Bacteria	Firmicutes	Clostridia	Lachnospirales	Lachnospiraceae	Clostridium	Unknown	GUT_GENOME143157	Clostridium_Q sp003024715_GUT_GENOME143157	97.9
clu_43	1	M043	UBA9502 sp. M043	Bacteria	Firmicutes	Clostridia	Lachnospirales	Lachnospiraceae	UBA9502	Unknown	GUT_GENOME001779	UBA9502 sp003506385_GUT_GENOME001779	98.4
clu_44	5	M044	UMGS1375 sp. M044	Bacteria	Firmicutes	Clostridia	Lachnospirales	Lachnospiraceae	UMGS1375	Unknown	GUT_GENOME000659	CAG-56 sp900066615_GUT_GENOME000659	97.1
clu_45	26	M045	Fusicatenibacter saccharivorans M045	Bacteria	Firmicutes	Clostridia	Lachnospirales	Lachnospiraceae	Fusicatenibacter	Fusicatenibacter saccharivorans	GUT_GENOME001587	Fusicatenibacter saccharivorans_GUT_GENOME001587	97.8
clu_46	2	M046	UBA7160 sp. M046	Bacteria	Firmicutes	Clostridia	Lachnospirales	Lachnospiraceae	UBA7160	Unknown	GUT_GENOME000479	UBA7160_GUT_GENOME000479	96.6
clu_47	1	M047	UBA7160 sp. M047	Bacteria	Firmicutes	Clostridia	Lachnospirales	Lachnospiraceae	UBA7160	Unknown	GUT_GENOME000634	UBA7160_GUT_GENOME000634	97.3
clu_48	32	M048	Anaerostipes hadrus M048	Bacteria	Firmicutes	Clostridia	Lachnospirales	Lachnospiraceae	Anaerostipes	Anaerostipes hadrus	GUT_GENOME147149	Anaerostipes hadrus_GUT_GENOME147149	97.8
clu_49	5	M049	Anaerobutyricum hallii M049	Bacteria	Firmicutes	Clostridia	Lachnospirales	Lachnospiraceae	Anaerobutyricum	Anaerobutyricum hallii	GUT_GENOME000299	Eubacterium_E hallii_A_GUT_GENOME000299	97.7
clu_50	15	M050	Anaerobutyricum hallii M050	Bacteria	Firmicutes	Clostridia	Lachnospirales	Lachnospiraceae	Anaerobutyricum	Anaerobutyricum hallii	GUT_GENOME001689	Eubacterium_E hallii_GUT_GENOME001689	98.6
clu_51	2	M051	KLE1615 sp. M051	Bacteria	Firmicutes	Clostridia	Lachnospirales	Lachnospiraceae	KLE1615	Unknown	GUT_GENOME001056	KLE1615 sp900066985_GUT_GENOME001056	97.3
clu_52	15	M052	Mediterraneibacter torques M052	Bacteria	Firmicutes	Clostridia	Lachnospirales	Lachnospiraceae	Mediterraneibacter	Mediterraneibacter torques	GUT_GENOME096193	Faecalicatena torques_GUT_GENOME096193	98.7
clu_53	2	M053	Schaedlerella glycyrrhizinilyticum M053	Bacteria	Firmicutes	Clostridia	Lachnospirales	Lachnospiraceae	Schaedlerella	Schaedlerella glycyrrhizinilyticum	GUT_GENOME096206	Faecalicatena glycyrrhizinilyticum_GUT_GENOME096206	98.4
clu_54	6	M054	Sellimonas intestinalis M054	Bacteria	Firmicutes	Clostridia	Lachnospirales	Lachnospiraceae	Sellimonas	Sellimonas intestinalis	GUT_GENOME000767	Sellimonas intestinalis_GUT_GENOME000767	99.2
clu_55	3	M055	Blautia sp. M055	Bacteria	Firmicutes	Clostridia	Lachnospirales	Lachnospiraceae	Blautia	Unknown	GUT_GENOME140265	Blautia sp000436935_GUT_GENOME140265	97.3
clu_56	8	M056	Faecalimonas umbilicata M056	Bacteria	Firmicutes	Clostridia	Lachnospirales	Lachnospiraceae	Faecalimonas	Faecalimonas umbilicata	GUT_GENOME096375	Tyzzerella sp000411335_GUT_GENOME096375	98
clu_57	2	M057	Dorea scindens M057	Bacteria	Firmicutes	Clostridia	Lachnospirales	Lachnospiraceae	Dorea	Dorea scindens	GUT_GENOME095973	Dorea scindens_GUT_GENOME095973	98.6
clu_58	7	M058	Dorea sp. M058	Bacteria	Firmicutes	Clostridia	Lachnospirales	Lachnospiraceae	Dorea	Unknown	GUT_GENOME095973	Dorea scindens_GUT_GENOME095973	94.4
clu_59	5	M059	Faecalimonas nexilis M059	Bacteria	Firmicutes	Clostridia	Lachnospirales	Lachnospiraceae	Faecalimonas	Faecalimonas nexilis	GUT_GENOME000718	Tyzzerella nexilis_GUT_GENOME000718	98.6
clu_60	2	M060	Dorea sp. M060	Bacteria	Firmicutes	Clostridia	Lachnospirales	Lachnospiraceae	Dorea	Unknown	GUT_GENOME103557	Dorea sp000433535_GUT_GENOME103557	98
clu_61	5	M061	Mediterraneibacter lactaris M061	Bacteria	Firmicutes	Clostridia	Lachnospirales	Lachnospiraceae	Mediterraneibacter	Mediterraneibacter lactaris	GUT_GENOME095983	Faecalicatena lactaris_GUT_GENOME095983	98.5
clu_62	5	M062	Mediterraneibacter faecis M062	Bacteria	Firmicutes	Clostridia	Lachnospirales	Lachnospiraceae	Mediterraneibacter	Mediterraneibacter faecis	GUT_GENOME001575	Faecalicatena faecis_GUT_GENOME001575	96.2
clu_63	7	M063	Eubacterium ventriosum M063	Bacteria	Firmicutes	Clostridia	Lachnospirales	Lachnospiraceae	Eubacterium	Eubacterium ventriosum	GUT_GENOME001239	Eubacterium_G ventriosum_GUT_GENOME001239	98.4
clu_64	1	M064	Eubacterium sp. M064	Bacteria	Firmicutes	Clostridia	Lachnospirales	Lachnospiraceae	Eubacterium	Unknown	GUT_GENOME001190	Eubacterium_G sp000435815_GUT_GENOME001190	97.6
clu_65	1	M065	TF01-11 sp. M065	Bacteria	Firmicutes	Clostridia	Lachnospirales	Lachnospiraceae	TF01-11	Unknown	GUT_GENOME155959	TF01-11 sp003149875_GUT_GENOME155959	98.7
clu_66	3	M066	Roseburia inulinivorans M066	Bacteria	Firmicutes	Clostridia	Lachnospirales	Lachnospiraceae	Roseburia	Roseburia inulinivorans	GUT_GENOME001770	Roseburia inulinivorans_GUT_GENOME001770	96.5
clu_67	4	M067	Eubacterium ramulus M067	Bacteria	Firmicutes	Clostridia	Lachnospirales	Lachnospiraceae	Eubacterium	Eubacterium ramulus	GUT_GENOME140233	Eubacterium_I ramulus_A_GUT_GENOME140233	98.3
clu_68	1	M068	Eubacterium ramulus M068	Bacteria	Firmicutes	Clostridia	Lachnospirales	Lachnospiraceae	Eubacterium	Eubacterium ramulus	GUT_GENOME096402	Eubacterium_I ramulus_GUT_GENOME096402	96.9
clu_69	2	M069	Dorea sp. M069	Bacteria	Firmicutes	Clostridia	Lachnospirales	Lachnospiraceae	Dorea	Unknown	GUT_GENOME001213	Dorea sp900066555_GUT_GENOME001213	97.4
clu_70	6	M070	Dorea formicigenerans M070	Bacteria	Firmicutes	Clostridia	Lachnospirales	Lachnospiraceae	Dorea	Dorea formicigenerans	GUT_GENOME000706	Dorea formicigenerans_GUT_GENOME000706	97.3
clu_71	5	M071	Bariatricus comes M071	Bacteria	Firmicutes	Clostridia	Lachnospirales	Lachnospiraceae	Bariatricus	Bariatricus comes	GUT_GENOME095993	Coprococcus_B comes_GUT_GENOME095993	96.1
clu_72	5	M072	Dorea longicatena M072	Bacteria	Firmicutes	Clostridia	Lachnospirales	Lachnospiraceae	Dorea	Dorea longicatena	GUT_GENOME000149	Dorea longicatena_GUT_GENOME000149	98
clu_73	11	M073	Dorea longicatena M073	Bacteria	Firmicutes	Clostridia	Lachnospirales	Lachnospiraceae	Dorea	Dorea longicatena	GUT_GENOME140235	Dorea longicatena_B_GUT_GENOME140235	97.7
clu_74	20	M074	Ruminococcus gnavus M074	Bacteria	Firmicutes	Clostridia	Lachnospirales	Lachnospiraceae	Ruminococcus	Ruminococcus gnavus	GUT_GENOME096210	Faecalicatena gnavus_GUT_GENOME096210	96.6
clu_75	1	M075	Anaerostipes caccae M075	Bacteria	Firmicutes	Clostridia	Lachnospirales	Lachnospiraceae	Anaerostipes	Anaerostipes caccae	GUT_GENOME000327	Anaerostipes caccae_GUT_GENOME000327	99.3
clu_76	2	M076	Frisingicoccus sp. M076	Bacteria	Firmicutes	Clostridia	Lachnospirales	Lachnospiraceae	Frisingicoccus	Unknown	GUT_GENOME117534	UBA7096_GUT_GENOME117534	99.1
clu_77	1	M077	Coprococcus catus M077	Bacteria	Firmicutes	Clostridia	Lachnospirales	Lachnospiraceae	Coprococcus	Coprococcus catus	GUT_GENOME103893	Coprococcus_A catus_GUT_GENOME103893	97.8
clu_78	8	M078	Lachnospira eligens M078	Bacteria	Firmicutes	Clostridia	Lachnospirales	Lachnospiraceae	Lachnospira	Lachnospira eligens	GUT_GENOME000237	Lachnospira eligens_B_GUT_GENOME000237	97.1
clu_79	2	M079	Lachnospira rogosae M079	Bacteria	Firmicutes	Clostridia	Lachnospirales	Lachnospiraceae	Lachnospira	Lachnospira rogosae	GUT_GENOME000308	Lachnospira rogosae_GUT_GENOME000308	98
clu_80	1	M080	Lachnospira sp. M080	Bacteria	Firmicutes	Clostridia	Lachnospirales	Lachnospiraceae	Lachnospira	Unknown	GUT_GENOME148443	Lachnospira sp000436535_GUT_GENOME148443	98.8
clu_81	2	M081	Blautia sp. M081	Bacteria	Firmicutes	Clostridia	Lachnospirales	Lachnospiraceae	Blautia	Unknown	GUT_GENOME001709	Blautia_A sp900066335_GUT_GENOME001709	98.8
clu_82	16	M082	Blautia massiliensis M082	Bacteria	Firmicutes	Clostridia	Lachnospirales	Lachnospiraceae	Blautia	Blautia massiliensis	GUT_GENOME000676	Blautia_A massiliensis_GUT_GENOME000676	95.9
clu_83	12	M083	Blautia sp. M083	Bacteria	Firmicutes	Clostridia	Lachnospirales	Lachnospiraceae	Blautia	Unknown	GUT_GENOME000004	Blautia_A sp900066165_GUT_GENOME000004	96.8
clu_84	6	M084	Blautia sp. M084	Bacteria	Firmicutes	Clostridia	Lachnospirales	Lachnospiraceae	Blautia	Unknown	GUT_GENOME000623	Blautia_A sp000433815_GUT_GENOME000623	99
clu_85	1	M085	Blautia sp. M085	Bacteria	Firmicutes	Clostridia	Lachnospirales	Lachnospiraceae	Blautia	Unknown	GUT_GENOME000623	Blautia_A sp000433815_GUT_GENOME000623	90.9
clu_86	3	M086	Blautia sp. M086	Bacteria	Firmicutes	Clostridia	Lachnospirales	Lachnospiraceae	Blautia	Unknown	GUT_GENOME001147	Blautia_A_GUT_GENOME001147	98.3
clu_87	15	M087	Blautia sp. M087	Bacteria	Firmicutes	Clostridia	Lachnospirales	Lachnospiraceae	Blautia	Unknown	GUT_GENOME096067	Blautia_A wexlerae_GUT_GENOME096067	97
clu_88	7	M088	Blautia sp. M088	Bacteria	Firmicutes	Clostridia	Lachnospirales	Lachnospiraceae	Blautia	Unknown	GUT_GENOME140320	Blautia_A sp000436615_GUT_GENOME140320	97.2
clu_89	2	M089	Blautia obeum M089	Bacteria	Firmicutes	Clostridia	Lachnospirales	Lachnospiraceae	Blautia	Blautia obeum	GUT_GENOME001261	Blautia_A obeum_GUT_GENOME001261	98.3
clu_90	1	M090	Blautia sp. M090	Bacteria	Firmicutes	Clostridia	Lachnospirales	Lachnospiraceae	Blautia	Unknown	GUT_GENOME000906	Blautia_A sp900120195_GUT_GENOME000906	97.4
clu_91	2	M091	Eisenbergiella massiliensis M091	Bacteria	Firmicutes	Clostridia	Lachnospirales	Lachnospiraceae	Eisenbergiella	Eisenbergiella massiliensis	GUT_GENOME239673	Eisenbergiella massiliensis_GUT_GENOME239673	99.1
clu_92	1	M092	Eisenbergiella sp. M092	Bacteria	Firmicutes	Clostridia	Lachnospirales	Lachnospiraceae	Eisenbergiella	Unknown	GUT_GENOME239799	Eisenbergiella sp900066775_GUT_GENOME239799	97.5
clu_93	2	M093	Ruminococcus sp. M093	Bacteria	Firmicutes	Clostridia	Lachnospirales	Lachnospiraceae	Ruminococcus	Unknown	GUT_GENOME136641	Ruminococcus_A sp000432335_GUT_GENOME136641	98.8
clu_94	4	M094	Ruminococcus sp. M094	Bacteria	Firmicutes	Clostridia	Lachnospirales	Lachnospiraceae	Ruminococcus	Unknown	GUT_GENOME264873	Ruminococcus_A sp000437095_GUT_GENOME264873	98.2
clu_95	2	M095	Ruminococcus sp. M095	Bacteria	Firmicutes	Clostridia	Lachnospirales	Lachnospiraceae	Ruminococcus	Unknown	GUT_GENOME239737	Ruminococcus_A sp003011855_GUT_GENOME239737	98
clu_96	10	M096	Agathobacter faecis M096	Bacteria	Firmicutes	Clostridia	Lachnospirales	Lachnospiraceae	Agathobacter	Agathobacter faecis	GUT_GENOME239728	Agathobacter faecis_GUT_GENOME239728	96.6
clu_97	33	M097	Agathobacter rectalis M097	Bacteria	Firmicutes	Clostridia	Lachnospirales	Lachnospiraceae	Agathobacter	Agathobacter rectalis	GUT_GENOME143712	Agathobacter rectalis_GUT_GENOME143712	97.5
clu_98	1	M098	CAG-45 sp. M098	Bacteria	Firmicutes	Clostridia	Lachnospirales	Lachnospiraceae	CAG-45	Unknown	GUT_GENOME000735	CAG-45 sp900066395_GUT_GENOME000735	98.1
clu_99	2	M099	Blautia coccoides M099	Bacteria	Firmicutes	Clostridia	Lachnospirales	Lachnospiraceae	Blautia	Blautia coccoides	GUT_GENOME103705	Blautia producta_GUT_GENOME103705	97.8
clu_100	2	M100	Blautia sp. M100	Bacteria	Firmicutes	Clostridia	Lachnospirales	Lachnospiraceae	Blautia	Unknown	GUT_GENOME000594	Blautia sp001304935_GUT_GENOME000594	99.5
clu_101	2	M101	Blautia sp. M101	Bacteria	Firmicutes	Clostridia	Lachnospirales	Lachnospiraceae	Blautia	Unknown	GUT_GENOME000583	Blautia sp000432195_GUT_GENOME000583	98.4
clu_102	9	M102	Blautia sp. M102	Bacteria	Firmicutes	Clostridia	Lachnospirales	Lachnospiraceae	Blautia	Unknown	GUT_GENOME225869	Blautia_GUT_GENOME225869	99.3
clu_103	4	M103	Blautia hansenii M103	Bacteria	Firmicutes	Clostridia	Lachnospirales	Lachnospiraceae	Blautia	Blautia hansenii	GUT_GENOME103765	Blautia hansenii_GUT_GENOME103765	98.1
clu_104	1	M104	Anaerovoracaceae sp. M104	Bacteria	Firmicutes	Clostridia	Peptostreptococcales	Anaerovoracaceae	Unknown	Unknown	GUT_GENOME213427	Anaerovoracaceae_GUT_GENOME213427	97.1
clu_105	1	M105	Hungatella effluvii M105	Bacteria	Firmicutes	Clostridia	Lachnospirales	Lachnospiraceae	Hungatella	Hungatella effluvii	GUT_GENOME000133	Hungatella effluvii_GUT_GENOME000133	96.9
clu_106	1	M106	CAG-81 sp. M106	Bacteria	Firmicutes	Clostridia	Lachnospirales	Lachnospiraceae	CAG-81	Unknown	GUT_GENOME001401	CAG-81 sp900066785_GUT_GENOME001401	98.4
clu_107	1	M107	CAG-81 sp. M107	Bacteria	Firmicutes	Clostridia	Lachnospirales	Lachnospiraceae	CAG-81	Unknown	GUT_GENOME000423	CAG-81 sp000435795_GUT_GENOME000423	97.7
clu_108	1	M108	Clostridium sp. M108	Bacteria	Firmicutes	Clostridia	Lachnospirales	Lachnospiraceae	Clostridium	Unknown	GUT_GENOME200873	Clostridium_Q sp000435655_GUT_GENOME200873	98.2
clu_109	4	M109	Enterocloster bolteae M109	Bacteria	Firmicutes	Clostridia	Lachnospirales	Lachnospiraceae	Enterocloster	Enterocloster bolteae	GUT_GENOME096485	Clostridium_M bolteae_GUT_GENOME096485	97
clu_110	1	M110	Enterocloster clostridioformis M110	Bacteria	Firmicutes	Clostridia	Lachnospirales	Lachnospiraceae	Enterocloster	Enterocloster clostridioformis	GUT_GENOME096670	Clostridium_M clostridioforme_A_GUT_GENOME096670	99.3
clu_111	1	M111	Enterocloster aldenensis M111	Bacteria	Firmicutes	Clostridia	Lachnospirales	Lachnospiraceae	Enterocloster	Enterocloster aldenensis	GUT_GENOME000980	Clostridium_M_GUT_GENOME000980	98.5
clu_112	1	M112	Enterocloster citroniae M112	Bacteria	Firmicutes	Clostridia	Lachnospirales	Lachnospiraceae	Enterocloster	Enterocloster citroniae	GUT_GENOME001135	Clostridium_M citroniae_GUT_GENOME001135	98.6
clu_113	3	M113	Enterocloster sp. M113	Bacteria	Firmicutes	Clostridia	Lachnospirales	Lachnospiraceae	Enterocloster	Unknown	GUT_GENOME001471	Clostridium_M sp000431375_GUT_GENOME001471	98.6
clu_114	1	M114	Enterocloster sp. M114	Bacteria	Firmicutes	Clostridia	Lachnospirales	Lachnospiraceae	Enterocloster	Unknown	GUT_GENOME094660	Clostridium_M_GUT_GENOME094660	98
clu_115	3	M115	Enterocloster sp. M115	Bacteria	Firmicutes	Clostridia	Lachnospirales	Lachnospiraceae	Enterocloster	Unknown	GUT_GENOME096538	Clostridium_M sp001517625_GUT_GENOME096538	98.5
clu_116	1	M116	Enterocloster sp. M116	Bacteria	Firmicutes	Clostridia	Lachnospirales	Lachnospiraceae	Enterocloster	Unknown	GUT_GENOME076000	Clostridium_M_GUT_GENOME076000	98.7
clu_117	1	M117	UBA1394 sp. M117	Bacteria	Firmicutes	Clostridia	Oscillospirales	Ruminococcaceae	UBA1394	Unknown	GUT_GENOME106274	UBA1394_GUT_GENOME106274	98.5
clu_118	1	M118	Oscillospiraceae sp. M118	Bacteria	Firmicutes	Clostridia	Oscillospirales	Oscillospiraceae	Unknown	Unknown	GUT_GENOME093619	Oscillospiraceae_GUT_GENOME093619	96.6
clu_119	1	M119	UCG-010 sp. M119	Bacteria	Firmicutes	Clostridia	Oscillospirales	CAG-382	UCG-010	Unknown	GUT_GENOME255912	UCG-010 sp003150215_GUT_GENOME255912	98
clu_120	1	M120	Mogibacterium sp. M120	Bacteria	Firmicutes	Clostridia	Peptostreptococcales	Anaerovoracaceae	Mogibacterium	Unknown	GUT_GENOME285829	Mogibacterium sp900315625_GUT_GENOME285829	96.7
clu_121	2	M121	Dorea phocaeensis M121	Bacteria	Firmicutes	Clostridia	Lachnospirales	Lachnospiraceae	Dorea	Dorea phocaeensis	GUT_GENOME131073	Dorea phocaeense_GUT_GENOME131073	97.8
clu_122	1	M122	Dorea sp. M122	Bacteria	Firmicutes	Clostridia	Lachnospirales	Lachnospiraceae	Dorea	Unknown	GUT_GENOME142396	Dorea sp000765215_GUT_GENOME142396	97.3
clu_123	2	M123	Dorea sp. M123	Bacteria	Firmicutes	Clostridia	Lachnospirales	Lachnospiraceae	Dorea	Unknown	GUT_GENOME137657	Dorea sp900312975_GUT_GENOME137657	96.6
clu_124	1	M124	Dorea faecis M124	Bacteria	Firmicutes	Clostridia	Lachnospirales	Lachnospiraceae	Dorea	Dorea faecis	GUT_GENOME142496	Dorea faecis_GUT_GENOME142496	97.5
clu_125	3	M125	Acidaminococcus provencensis M125	Bacteria	Firmicutes	Negativicutes	Acidaminococcales	Acidaminococcaceae	Acidaminococcus	Acidaminococcus provencensis	GUT_GENOME001309	Acidaminococcus sp900291475_GUT_GENOME001309	99.1
clu_126	1	M126	Acidaminococcus intestini M126	Bacteria	Firmicutes	Negativicutes	Acidaminococcales	Acidaminococcaceae	Acidaminococcus	Acidaminococcus intestini	GUT_GENOME096377	Acidaminococcus intestini_GUT_GENOME096377	99.6
clu_127	2	M127	Eubacterium limosum M127	Bacteria	Firmicutes	Clostridia	Eubacteriales	Eubacteriaceae	Eubacterium	Eubacterium limosum	GUT_GENOME095515	Eubacterium limosum_GUT_GENOME095515	98.1
clu_128	2	M128	PeH17 sp. M128	Bacteria	Firmicutes	Clostridia	Christensenellales	CAG-138	PeH17	Unknown	GUT_GENOME014725	PeH17 sp000435055_GUT_GENOME014725	97.8
clu_129	3	M129	Ruminiclostridium siraeum M129	Bacteria	Firmicutes	Clostridia	Oscillospirales	Ruminococcaceae	Ruminiclostridium	Ruminiclostridium siraeum	GUT_GENOME147164	Ruminiclostridium_E siraeum_GUT_GENOME147164	96.4
clu_130	1	M130	Phil1 sp. M130	Bacteria	Firmicutes	Clostridia	Christensenellales	CAG-138	Phil1	Unknown	GUT_GENOME026012	Phil1 sp001940855_GUT_GENOME026012	97.2
clu_131	6	M131	Eubacterium sp. M131	Bacteria	Firmicutes	Clostridia	Oscillospirales	Acutalibacteraceae	Eubacterium	Unknown	GUT_GENOME019375	Eubacterium_R sp000436835_GUT_GENOME019375	97.5
clu_132	4	M132	Eubacterium sp. M132	Bacteria	Firmicutes	Clostridia	Oscillospirales	Acutalibacteraceae	Eubacterium	Unknown	GUT_GENOME105321	Eubacterium_R sp000434995_GUT_GENOME105321	97.8
clu_133	1	M133	Eubacterium sp. M133	Bacteria	Firmicutes	Clostridia	Oscillospirales	Acutalibacteraceae	Eubacterium	Unknown	GUT_GENOME256353	Eubacterium_R sp000433975_GUT_GENOME256353	98.7
clu_134	2	M134	CAG-274 sp. M134	Bacteria	Firmicutes	Clostridia	Lachnospirales	CAG-274	CAG-274	Unknown	GUT_GENOME153591	CAG-274_GUT_GENOME153591	98.6
clu_135	2	M135	GCA-900066995 sp. M135	Bacteria	Firmicutes	Clostridia	Oscillospirales	Acutalibacteraceae	GCA-900066995	Unknown	GUT_GENOME000141	GCA-900066995 sp900291955_GUT_GENOME000141	98.4
clu_136	18	M136	CAG-41 sp. M136	Bacteria	Firmicutes	Clostridia	Monoglobales	UBA1381	CAG-41	Unknown	GUT_GENOME000136	CAG-41 sp900066215_GUT_GENOME000136	97.3
clu_137	2	M137	Ruminococcus sp. M137	Bacteria	Firmicutes	Clostridia	Oscillospirales	Acutalibacteraceae	Ruminococcus	Unknown	GUT_GENOME252988	Ruminococcus_E sp900314705_GUT_GENOME252988	97.9
clu_138	24	M138	Ruminococcus bromii M138	Bacteria	Firmicutes	Clostridia	Oscillospirales	Acutalibacteraceae	Ruminococcus	Ruminococcus bromii	GUT_GENOME001659	Ruminococcus_E bromii_B_GUT_GENOME001659	97.4
clu_139	9	M139	Ruminococcus sp. M139	Bacteria	Firmicutes	Clostridia	Oscillospirales	Acutalibacteraceae	Ruminococcus	Unknown	GUT_GENOME150720	Ruminococcus_E sp003526955_GUT_GENOME150720	98.1
clu_140	1	M140	Ruminococcus sp. M140	Bacteria	Firmicutes	Clostridia	Oscillospirales	Acutalibacteraceae	Ruminococcus	Unknown	GUT_GENOME140342	Ruminococcus_E_GUT_GENOME140342	97.4
clu_141	5	M141	CAG-302 sp. M141	Bacteria	Firmicutes	Bacilli	RF39	CAG-302	CAG-302	Unknown	GUT_GENOME251199	CAG-302 sp000431795_GUT_GENOME251199	98.5
clu_142	4	M142	CAG-302 sp. M142	Bacteria	Firmicutes	Bacilli	RF39	CAG-302	CAG-302	Unknown	GUT_GENOME256853	CAG-302 sp001916775_GUT_GENOME256853	97.6
clu_143	1	M143	CAG-605 sp. M143	Bacteria	Firmicutes	Bacilli	RF39	CAG-1000	CAG-605	Unknown	GUT_GENOME006546	CAG-605 sp000433255_GUT_GENOME006546	96.4
clu_144	1	M144	CAG-594 sp. M144	Bacteria	Firmicutes	Bacilli	RF39	CAG-433	CAG-594	Unknown	GUT_GENOME255983	CAG-594 sp000434835_GUT_GENOME255983	98
clu_145	1	M145	CAG-417 sp. M145	Bacteria	Firmicutes	Bacilli	RF39	CAG-611	CAG-417	Unknown	GUT_GENOME029635	CAG-417 sp000432835_GUT_GENOME029635	99
clu_146	1	M146	Turicibacter sp. M146	Bacteria	Firmicutes	Bacilli	Haloplasmatales	Turicibacteraceae	Turicibacter	Unknown	GUT_GENOME000147	Turicibacter sp001543345_GUT_GENOME000147	98.2
clu_147	2	M147	SFEL01 sp. M147	Bacteria	Firmicutes	Clostridia	Christensenellales	CAG-138	SFEL01	Unknown	GUT_GENOME260844	CAG-138_GUT_GENOME260844	98.1
clu_148	7	M148	Megamonas funiformis M148	Bacteria	Firmicutes	Negativicutes	Selenomonadales	Selenomonadaceae	Megamonas	Megamonas funiformis	GUT_GENOME140251	Megamonas funiformis_GUT_GENOME140251	97.2
clu_149	8	M149	Longicatena innocuum M149	Bacteria	Firmicutes	Bacilli	Erysipelotrichales	Erysipelotrichaceae	Longicatena	Longicatena innocuum	GUT_GENOME096250	Absiella innocuum_GUT_GENOME096250	98.8
clu_150	1	M150	Longicatena sp. M150	Bacteria	Firmicutes	Bacilli	Erysipelotrichales	Erysipelotrichaceae	Longicatena	Unknown	GUT_GENOME096124	Absiella sp000165065_GUT_GENOME096124	97.6
clu_151	6	M151	CAG-245 sp. M151	Bacteria	Firmicutes	Clostridia	TANB77	CAG-508	CAG-245	Unknown	GUT_GENOME164321	CAG-245 sp000435175_GUT_GENOME164321	97.5
clu_152	1	M152	CAG-269 sp. M152	Bacteria	Firmicutes	Clostridia	TANB77	CAG-508	CAG-269	Unknown	GUT_GENOME251277	CAG-269 sp001916055_GUT_GENOME251277	97.2
clu_153	1	M153	CAG-269 sp. M153	Bacteria	Firmicutes	Clostridia	TANB77	CAG-508	CAG-269	Unknown	GUT_GENOME235551	CAG-269 sp003525075_GUT_GENOME235551	98.2
clu_154	1	M154	CAG-245 sp. M154	Bacteria	Firmicutes	Clostridia	TANB77	CAG-508	CAG-245	Unknown	GUT_GENOME281441	CAG-245 sp000434195_GUT_GENOME281441	96.7
clu_155	2	M155	CAG-492 sp. M155	Bacteria	Firmicutes	Clostridia	TANB77	CAG-508	CAG-492	Unknown	GUT_GENOME260425	CAG-492 sp000434335_GUT_GENOME260425	96
clu_156	1	M156	CAG-465 sp. M156	Bacteria	Firmicutes	Clostridia	TANB77	CAG-465	CAG-465	Unknown	GUT_GENOME253237	CAG-465 sp000433755_GUT_GENOME253237	98.1
clu_157	1	M157	UMGS1781 sp. M157	Bacteria	Firmicutes	Clostridia	TANB77	CAG-508	UMGS1781	Unknown	GUT_GENOME100501	CAG-508_GUT_GENOME100501	98.8
clu_158	3	M158	Ligilactobacillus salivarius M158	Bacteria	Firmicutes	Bacilli	Lactobacillales	Lactobacillaceae	Ligilactobacillus	Ligilactobacillus salivarius	GUT_GENOME141003	Lactobacillus_B salivarius_GUT_GENOME141003	97.9
clu_159	1	M159	Ligilactobacillus ruminis M159	Bacteria	Firmicutes	Bacilli	Lactobacillales	Lactobacillaceae	Ligilactobacillus	Ligilactobacillus ruminis	GUT_GENOME096055	Lactobacillus_B ruminis_GUT_GENOME096055	96.6
clu_160	6	M160	Intestinibacter bartlettii M160	Bacteria	Firmicutes	Clostridia	Peptostreptococcales	Peptostreptococcaceae	Intestinibacter	Intestinibacter bartlettii	GUT_GENOME000245	Intestinibacter bartlettii_GUT_GENOME000245	98.4
clu_161	2	M161	Romboutsia timonensis M161	Bacteria	Firmicutes	Clostridia	Peptostreptococcales	Peptostreptococcaceae	Romboutsia	Romboutsia timonensis	GUT_GENOME149497	Romboutsia timonensis_GUT_GENOME149497	99.3
clu_162	1	M162	Clostridium sp. M162	Bacteria	Firmicutes	Clostridia	Clostridiales	Clostridiaceae	Clostridium	Unknown	GUT_GENOME036763	Clostridium_GUT_GENOME036763	98.9
clu_163	3	M163	Methanobrevibacter smithii M163	Archaea	Euryarchaeota	Methanobacteria	Methanobacteriales	Methanobacteriaceae	Methanobrevibacter	Methanobrevibacter smithii	GUT_GENOME132205	Methanobrevibacter_A smithii_GUT_GENOME132205	98.7
clu_164	5	M164	Holdemanella biformis M164	Bacteria	Firmicutes	Bacilli	Erysipelotrichales	Erysipelotrichaceae	Holdemanella	Holdemanella biformis	GUT_GENOME103864	Holdemanella biformis_GUT_GENOME103864	96.2
clu_165	2	M165	Holdemanella sp. M165	Bacteria	Firmicutes	Bacilli	Erysipelotrichales	Erysipelotrichaceae	Holdemanella	Unknown	GUT_GENOME001602	Holdemanella sp002299315_GUT_GENOME001602	95.7
clu_166	1	M166	Oceanobacillus sp. M166	Bacteria	Firmicutes	Bacilli	Bacillales	Amphibacillaceae	Oceanobacillus	Unknown	GUT_GENOME140235	Dorea longicatena_B_GUT_GENOME140235	78
clu_167	1	M167	Haemophilus parainfluenzae M167	Bacteria	Proteobacteria	Gammaproteobacteria	Enterobacterales	Pasteurellaceae	Haemophilus	Haemophilus parainfluenzae	GUT_GENOME207341	Haemophilus_D parainfluenzae_J_GUT_GENOME207341	96.4
clu_168	1	M168	Lachnospiraceae sp. M168	Bacteria	Firmicutes	Clostridia	Lachnospirales	Lachnospiraceae	Unknown	Unknown	GUT_GENOME167727	Robinsoniella_GUT_GENOME167727	97.6
clu_169	1	M169	CAG-488 sp. M169	Bacteria	Firmicutes	Clostridia	Oscillospirales	Acutalibacteraceae	CAG-488	Unknown	GUT_GENOME022180	CAG-488 sp000434055_GUT_GENOME022180	98.1
clu_170	2	M170	Catenibacterium sp. M170	Bacteria	Firmicutes	Bacilli	Erysipelotrichales	Erysipelatoclostridiaceae	Catenibacterium	Unknown	GUT_GENOME001490	Catenibacterium sp000437715_GUT_GENOME001490	97.8
clu_171	2	M171	Erysipelatoclostridium sp. M171	Bacteria	Firmicutes	Bacilli	Erysipelotrichales	Erysipelatoclostridiaceae	Erysipelatoclostridium	Unknown	GUT_GENOME143156	Erysipelatoclostridium sp003024675_GUT_GENOME143156	97.2
clu_172	24	M172	Erysipelatoclostridium sp. M172	Bacteria	Firmicutes	Bacilli	Erysipelotrichales	Erysipelatoclostridiaceae	Erysipelatoclostridium	Unknown	GUT_GENOME000196	Erysipelatoclostridium sp000752095_GUT_GENOME000196	96.8
clu_173	1	M173	Longibaculum muris M173	Bacteria	Firmicutes	Bacilli	Erysipelotrichales	Erysipelatoclostridiaceae	Longibaculum	Longibaculum muris	GUT_GENOME000624	KLE1796 sp001580115_GUT_GENOME000624	99.5
clu_174	1	M174	Coprobacillus cateniformis M174	Bacteria	Firmicutes	Bacilli	Erysipelotrichales	Erysipelatoclostridiaceae	Coprobacillus	Coprobacillus cateniformis	GUT_GENOME096262	Coprobacillus cateniformis_GUT_GENOME096262	98.8
clu_175	1	M175	Massiliomicrobiota sp. M175	Bacteria	Firmicutes	Bacilli	Erysipelotrichales	Erysipelatoclostridiaceae	Massiliomicrobiota	Unknown	GUT_GENOME095083	Massiliomicrobiota timonensis_GUT_GENOME095083	96.4
clu_176	10	M176	Erysipelatoclostridium ramosum M176	Bacteria	Firmicutes	Bacilli	Erysipelotrichales	Erysipelatoclostridiaceae	Erysipelatoclostridium	Erysipelatoclostridium ramosum	GUT_GENOME096257	Erysipelatoclostridium ramosum_GUT_GENOME096257	99
clu_177	1	M177	Erysipelatoclostridium sp. M177	Bacteria	Firmicutes	Bacilli	Erysipelotrichales	Erysipelatoclostridiaceae	Erysipelatoclostridium	Unknown	GUT_GENOME095977	Erysipelatoclostridium spiroforme_GUT_GENOME095977	96.8
clu_178	2	M178	Longicatena dolichum M178	Bacteria	Firmicutes	Bacilli	Erysipelotrichales	Erysipelotrichaceae	Longicatena	Longicatena dolichum	GUT_GENOME095962	Absiella dolichum_GUT_GENOME095962	98.6
clu_179	1	M179	Longicatena sp. M179	Bacteria	Firmicutes	Bacilli	Erysipelotrichales	Erysipelotrichaceae	Longicatena	Unknown	GUT_GENOME001340	Absiella_GUT_GENOME001340	99.5
clu_180	1	M180	Longicatena caecimuris M180	Bacteria	Firmicutes	Bacilli	Erysipelotrichales	Erysipelotrichaceae	Longicatena	Longicatena caecimuris	GUT_GENOME096253	Absiella sp000163515_GUT_GENOME096253	98.8
clu_181	12	M181	Klebsiella pneumoniae M181	Bacteria	Proteobacteria	Gammaproteobacteria	Enterobacterales	Enterobacteriaceae	Klebsiella	Klebsiella pneumoniae	GUT_GENOME147598	Klebsiella pneumoniae_GUT_GENOME147598	98.9
clu_182	1	M182	Klebsiella aerogenes M182	Bacteria	Proteobacteria	Gammaproteobacteria	Enterobacterales	Enterobacteriaceae	Klebsiella	Klebsiella aerogenes	GUT_GENOME143727	Klebsiella_B aerogenes_GUT_GENOME143727	96.4
clu_183	35	M183	Escherichia flexneri M183	Bacteria	Proteobacteria	Gammaproteobacteria	Enterobacterales	Enterobacteriaceae	Escherichia	Escherichia flexneri	GUT_GENOME144544	Escherichia coli_D_GUT_GENOME144544	96.6
clu_184	2	M184	Enterobacter roggenkampii M184	Bacteria	Proteobacteria	Gammaproteobacteria	Enterobacterales	Enterobacteriaceae	Enterobacter	Enterobacter roggenkampii	GUT_GENOME143746	Enterobacter nimipressuralis_GUT_GENOME143746	98
clu_185	1	M185	Citrobacter portucalensis M185	Bacteria	Proteobacteria	Gammaproteobacteria	Enterobacterales	Enterobacteriaceae	Citrobacter	Citrobacter portucalensis	GUT_GENOME103766	Citrobacter portucalensis_GUT_GENOME103766	98.5
clu_186	1	M186	Citrobacter freundii M186	Bacteria	Proteobacteria	Gammaproteobacteria	Enterobacterales	Enterobacteriaceae	Citrobacter	Citrobacter freundii	GUT_GENOME000563	Citrobacter freundii_GUT_GENOME000563	98.7
clu_187	2	M187	UBA1191 sp. M187	Bacteria	Firmicutes	Clostridia	Peptostreptococcales	Anaerovoracaceae	UBA1191	Unknown	GUT_GENOME186087	UBA1191_GUT_GENOME186087	98.7
clu_188	4	M188	UBA1191 sp. M188	Bacteria	Firmicutes	Clostridia	Peptostreptococcales	Anaerovoracaceae	UBA1191	Unknown	GUT_GENOME253944	UBA1191_GUT_GENOME253944	97.6
clu_189	1	M189	UBA1191 sp. M189	Bacteria	Firmicutes	Clostridia	Peptostreptococcales	Anaerovoracaceae	UBA1191	Unknown	GUT_GENOME000159	UBA1191 sp900066305_GUT_GENOME000159	97.5
clu_190	1	M190	UBA1191 sp. M190	Bacteria	Firmicutes	Clostridia	Peptostreptococcales	Anaerovoracaceae	UBA1191	Unknown	GUT_GENOME100857	UBA1191_GUT_GENOME100857	99.5
clu_191	1	M191	Anaerovoracaceae sp. M191	Bacteria	Firmicutes	Clostridia	Peptostreptococcales	Anaerovoracaceae	Unknown	Unknown	GUT_GENOME258449	Anaerovoracaceae_GUT_GENOME258449	98.6
clu_192	1	M192	Mesosutterella multiformis M192	Bacteria	Proteobacteria	Gammaproteobacteria	Burkholderiales	Burkholderiaceae	Mesosutterella	Mesosutterella multiformis	GUT_GENOME143188	Dakarella_GUT_GENOME143188	98.8
clu_193	3	M193	Ruminococcus callidus M193	Bacteria	Firmicutes	Clostridia	Oscillospirales	Ruminococcaceae	Ruminococcus	Ruminococcus callidus	GUT_GENOME140311	Ruminococcus_C callidus_GUT_GENOME140311	97.1
clu_194	1	M194	Ruminococcus sp. M194	Bacteria	Firmicutes	Clostridia	Oscillospirales	Ruminococcaceae	Ruminococcus	Unknown	GUT_GENOME066545	Ruminococcus_C sp000980705_GUT_GENOME066545	98.4
clu_195	2	M195	Eubacterium sp. M195	Bacteria	Firmicutes	Clostridia	Peptostreptococcales	Anaerovoracaceae	Eubacterium	Unknown	GUT_GENOME031326	Eubacterium_M_GUT_GENOME031326	96.4
clu_196	1	M196	CAG-145 sp. M196	Bacteria	Firmicutes	Clostridia	Peptostreptococcales	Anaerovoracaceae	CAG-145	Unknown	GUT_GENOME175986	CAG-145 sp000435715_GUT_GENOME175986	97.8
clu_197	1	M197	Dialister succinatiphilus M197	Bacteria	Firmicutes	Negativicutes	Veillonellales	Dialisteraceae	Dialister	Dialister succinatiphilus	GUT_GENOME096252	Dialister succinatiphilus_GUT_GENOME096252	96.6
clu_198	1	M198	Ochrobactrum anthropi M198	Bacteria	Proteobacteria	Alphaproteobacteria	Rhizobiales	Rhizobiaceae	Ochrobactrum	Ochrobactrum anthropi	GUT_GENOME000122	Bacteroides finegoldii_GUT_GENOME000122	70.4
clu_199	2	M199	Anaeroglobus micronuciformis M199	Bacteria	Firmicutes	Negativicutes	Veillonellales	Megasphaeraceae	Anaeroglobus	Anaeroglobus micronuciformis	GUT_GENOME263950	Anaeroglobus micronuciformis_GUT_GENOME263950	97.1
clu_200	1	M200	Megasphaera sp. M200	Bacteria	Firmicutes	Negativicutes	Veillonellales	Megasphaeraceae	Megasphaera	Unknown	GUT_GENOME141145	Megasphaera sp000417505_GUT_GENOME141145	73.7
clu_201	1	M201	Megasphaera sp. M201	Bacteria	Firmicutes	Negativicutes	Veillonellales	Megasphaeraceae	Megasphaera	Unknown	GUT_GENOME141145	Megasphaera sp000417505_GUT_GENOME141145	98.8
clu_202	6	M202	Akkermansia muciniphila M202	Bacteria	Verrucomicrobia	Verrucomicrobiae	Verrucomicrobiales	Akkermansiaceae	Akkermansia	Akkermansia muciniphila	GUT_GENOME143211	Akkermansia muciniphila_GUT_GENOME143211	99.2
clu_203	2	M203	Akkermansia muciniphila M203	Bacteria	Verrucomicrobia	Verrucomicrobiae	Verrucomicrobiales	Akkermansiaceae	Akkermansia	Akkermansia muciniphila	GUT_GENOME143197	Akkermansia muciniphila_C_GUT_GENOME143197	98.7
clu_204	5	M204	Akkermansia muciniphila M204	Bacteria	Verrucomicrobia	Verrucomicrobiae	Verrucomicrobiales	Akkermansiaceae	Akkermansia	Akkermansia muciniphila	GUT_GENOME143202	Akkermansia muciniphila_B_GUT_GENOME143202	98.6
clu_205	4	M205	UBA1691 sp. M205	Bacteria	Firmicutes	Clostridia	Oscillospirales	Acutalibacteraceae	UBA1691	Unknown	GUT_GENOME252930	UBA1691_GUT_GENOME252930	99.1
clu_206	2	M206	CAG-180 sp. M206	Bacteria	Firmicutes	Clostridia	Oscillospirales	Acutalibacteraceae	CAG-180	Unknown	GUT_GENOME266586	CAG-180 sp000432435_GUT_GENOME266586	97.7
clu_207	3	M207	CAG-177 sp. M207	Bacteria	Firmicutes	Clostridia	Oscillospirales	Acutalibacteraceae	CAG-177	Unknown	GUT_GENOME025676	CAG-177 sp003514385_GUT_GENOME025676	97.5
clu_208	1	M208	CAG-177 sp. M208	Bacteria	Firmicutes	Clostridia	Oscillospirales	Acutalibacteraceae	CAG-177	Unknown	GUT_GENOME261446	CAG-177 sp003538135_GUT_GENOME261446	98
clu_209	1	M209	Tardiphaga sp. M209	Bacteria	Proteobacteria	Alphaproteobacteria	Rhizobiales	Xanthobacteraceae	Tardiphaga	Unknown	GUT_GENOME207869	Bradyrhizobium sp000015165_GUT_GENOME207869	81.3
clu_210	1	M210	Mesorhizobium sp. M210	Bacteria	Proteobacteria	Alphaproteobacteria	Rhizobiales	Rhizobiaceae	Mesorhizobium	Unknown	GUT_GENOME095287	Methylobacterium sp002778835_GUT_GENOME095287	73.7
clu_211	3	M211	Rothia mucilaginosa M211	Bacteria	Actinobacteria	Actinomycetia	Actinomycetales	Micrococcaceae	Rothia	Rothia mucilaginosa	GUT_GENOME207489	Rothia mucilaginosa_A_GUT_GENOME207489	96.3
clu_212	2	M212	Rothia mucilaginosa M212	Bacteria	Actinobacteria	Actinomycetia	Actinomycetales	Micrococcaceae	Rothia	Rothia mucilaginosa	GUT_GENOME095336	Rothia mucilaginosa_B_GUT_GENOME095336	96.2
clu_213	3	M213	Pauljensenia sp. M213	Bacteria	Actinobacteria	Actinomycetia	Actinomycetales	Actinomycetaceae	Pauljensenia	Unknown	GUT_GENOME095650	Pauljensenia_GUT_GENOME095650	90.7
clu_214	1	M214	Pauljensenia bouchesdurhonensis M214	Bacteria	Actinobacteria	Actinomycetia	Actinomycetales	Actinomycetaceae	Pauljensenia	Pauljensenia bouchesdurhonensis	GUT_GENOME262065	Pauljensenia bouchesdurhonensis_GUT_GENOME262065	96.3
clu_215	1	M215	Pauljensenia sp. M215	Bacteria	Actinobacteria	Actinomycetia	Actinomycetales	Actinomycetaceae	Pauljensenia	Unknown	GUT_GENOME207226	Pauljensenia sp001838165_GUT_GENOME207226	93.4
clu_216	1	M216	Pauljensenia sp. M216	Bacteria	Actinobacteria	Actinomycetia	Actinomycetales	Actinomycetaceae	Pauljensenia	Unknown	GUT_GENOME096378	Pauljensenia sp000411415_GUT_GENOME096378	93.6
clu_217	1	M217	Pauljensenia sp. M217	Bacteria	Actinobacteria	Actinomycetia	Actinomycetales	Actinomycetaceae	Pauljensenia	Unknown	GUT_GENOME065370	Pauljensenia sp000278725_GUT_GENOME065370	96.4
clu_218	1	M218	Olsenella sp. M218	Bacteria	Actinobacteria	Coriobacteriia	Coriobacteriales	Atopobiaceae	Olsenella	Unknown	GUT_GENOME285133	Olsenella_E provencensis_GUT_GENOME285133	96.6
clu_219	1	M219	Olsenella sp. M219	Bacteria	Actinobacteria	Coriobacteriia	Coriobacteriales	Atopobiaceae	Olsenella	Unknown	GUT_GENOME142589	Olsenella_E sp900119915_GUT_GENOME142589	98
clu_220	1	M220	Olsenella sp. M220	Bacteria	Actinobacteria	Coriobacteriia	Coriobacteriales	Atopobiaceae	Olsenella	Unknown	GUT_GENOME143191	Olsenella_E_GUT_GENOME143191	95.8
clu_221	2	M221	Olsenella sp. M221	Bacteria	Actinobacteria	Coriobacteriia	Coriobacteriales	Atopobiaceae	Olsenella	Unknown	GUT_GENOME001638	Olsenella_B sp000752675_GUT_GENOME001638	98.8
clu_222	1	M222	Olsenella sp. M222	Bacteria	Actinobacteria	Coriobacteriia	Coriobacteriales	Atopobiaceae	Olsenella	Unknown	GUT_GENOME034446	Atopobiaceae_GUT_GENOME034446	93.1
clu_223	5	M223	Collinsella sp. M223	Bacteria	Actinobacteria	Coriobacteriia	Coriobacteriales	Coriobacteriaceae	Collinsella	Unknown	GUT_GENOME239815	Collinsella_GUT_GENOME239815	98.2
clu_224	3	M224	Collinsella sp. M224	Bacteria	Actinobacteria	Coriobacteriia	Coriobacteriales	Coriobacteriaceae	Collinsella	Unknown	GUT_GENOME001122	Collinsella_GUT_GENOME001122	97.1
clu_225	26	M225	Collinsella sp. M225	Bacteria	Actinobacteria	Coriobacteriia	Coriobacteriales	Coriobacteriaceae	Collinsella	Unknown	GUT_GENOME001245	Collinsella_GUT_GENOME001245	96.3
clu_226	1	M226	Collinsella sp. M226	Bacteria	Actinobacteria	Coriobacteriia	Coriobacteriales	Coriobacteriaceae	Collinsella	Unknown	GUT_GENOME001681	Collinsella_GUT_GENOME001681	95.9
clu_227	1	M227	Collinsella aerofaciens M227	Bacteria	Actinobacteria	Coriobacteriia	Coriobacteriales	Coriobacteriaceae	Collinsella	Collinsella aerofaciens	GUT_GENOME218496	Collinsella_GUT_GENOME218496	95.8
clu_228	1	M228	Collinsella sp. M228	Bacteria	Actinobacteria	Coriobacteriia	Coriobacteriales	Coriobacteriaceae	Collinsella	Unknown	GUT_GENOME090402	Collinsella sp002391315_GUT_GENOME090402	97
clu_229	1	M229	Collinsella bouchesdurhonensis M229	Bacteria	Actinobacteria	Coriobacteriia	Coriobacteriales	Coriobacteriaceae	Collinsella	Collinsella bouchesdurhonensis	GUT_GENOME094042	Collinsella bouchesdurhonensis_GUT_GENOME094042	95.6
clu_230	2	M230	Collinsella sp. M230	Bacteria	Actinobacteria	Coriobacteriia	Coriobacteriales	Coriobacteriaceae	Collinsella	Unknown	GUT_GENOME138463	Collinsella_GUT_GENOME138463	96.8
clu_231	6	M231	Enorma massiliensis M231	Bacteria	Actinobacteria	Coriobacteriia	Coriobacteriales	Coriobacteriaceae	Enorma	Enorma massiliensis	GUT_GENOME096284	Enorma massiliensis_GUT_GENOME096284	95.4
clu_232	7	M232	Collinsella intestinalis M232	Bacteria	Actinobacteria	Coriobacteriia	Coriobacteriales	Coriobacteriaceae	Collinsella	Collinsella intestinalis	GUT_GENOME001538	Collinsella intestinalis_GUT_GENOME001538	95.2
clu_233	1	M233	Collinsella tanakaei M233	Bacteria	Actinobacteria	Coriobacteriia	Coriobacteriales	Coriobacteriaceae	Collinsella	Collinsella tanakaei	GUT_GENOME096217	Collinsella tanakaei_GUT_GENOME096217	97
clu_234	1	M234	AM07-15 sp. M234	Bacteria	Firmicutes	Clostridia	Oscillospirales	Butyricicoccaceae	AM07-15	Unknown	GUT_GENOME001315	Butyricicoccaceae_GUT_GENOME001315	95.7
clu_235	6	M235	CAG-1427 sp. M235	Bacteria	Actinobacteria	Coriobacteriia	Coriobacteriales	Eggerthellaceae	CAG-1427	Unknown	GUT_GENOME058829	CAG-1427 sp000435475_GUT_GENOME058829	95.5
clu_236	1	M236	CAG-1427 sp. M236	Bacteria	Actinobacteria	Coriobacteriia	Coriobacteriales	Eggerthellaceae	CAG-1427	Unknown	GUT_GENOME089175	CAG-1427 sp000436075_GUT_GENOME089175	97
clu_237	5	M237	Bifidobacterium animalis M237	Bacteria	Actinobacteria	Actinomycetia	Actinomycetales	Bifidobacteriaceae	Bifidobacterium	Bifidobacterium animalis	GUT_GENOME143348	Bifidobacterium animalis_GUT_GENOME143348	100
clu_238	1	M238	Bifidobacterium globosum M238	Bacteria	Actinobacteria	Actinomycetia	Actinomycetales	Bifidobacteriaceae	Bifidobacterium	Bifidobacterium globosum	GUT_GENOME142015	Bifidobacterium pseudolongum_A_GUT_GENOME142015	97.6
clu_239	6	M239	Bifidobacterium dentium M239	Bacteria	Actinobacteria	Actinomycetia	Actinomycetales	Bifidobacteriaceae	Bifidobacterium	Bifidobacterium dentium	GUT_GENOME096132	Bifidobacterium dentium_GUT_GENOME096132	98.5
clu_240	18	M240	Bifidobacterium pseudocatenulatum M240	Bacteria	Actinobacteria	Actinomycetia	Actinomycetales	Bifidobacteriaceae	Bifidobacterium	Bifidobacterium pseudocatenulatum	GUT_GENOME239670	Bifidobacterium pseudocatenulatum_GUT_GENOME239670	98.2
clu_241	9	M241	Bifidobacterium adolescentis M241	Bacteria	Actinobacteria	Actinomycetia	Actinomycetales	Bifidobacteriaceae	Bifidobacterium	Bifidobacterium adolescentis	GUT_GENOME142522	Bifidobacterium adolescentis_GUT_GENOME142522	98.5
clu_242	6	M242	Bifidobacterium bifidum M242	Bacteria	Actinobacteria	Actinomycetia	Actinomycetales	Bifidobacteriaceae	Bifidobacterium	Bifidobacterium bifidum	GUT_GENOME142525	Bifidobacterium bifidum_GUT_GENOME142525	98.7
clu_243	3	M243	Bifidobacterium breve M243	Bacteria	Actinobacteria	Actinomycetia	Actinomycetales	Bifidobacteriaceae	Bifidobacterium	Bifidobacterium breve	GUT_GENOME143483	Bifidobacterium breve_GUT_GENOME143483	98
clu_244	57	M244	Bifidobacterium longum M244	Bacteria	Actinobacteria	Actinomycetia	Actinomycetales	Bifidobacteriaceae	Bifidobacterium	Bifidobacterium longum	GUT_GENOME095938	Bifidobacterium infantis_GUT_GENOME095938	95.3
clu_245	3	M245	CAG-1427 sp. M245	Bacteria	Actinobacteria	Coriobacteriia	Coriobacteriales	Eggerthellaceae	CAG-1427	Unknown	GUT_GENOME049425	CAG-1427_GUT_GENOME049425	97.1
clu_246	12	M246	Raoultibacter timonensis M246	Bacteria	Actinobacteria	Coriobacteriia	Coriobacteriales	Eggerthellaceae	Raoultibacter	Raoultibacter timonensis	GUT_GENOME142593	Gordonibacter massiliensis_GUT_GENOME142593	78
clu_247	2	M247	Raoultibacter massiliensis M247	Bacteria	Actinobacteria	Coriobacteriia	Coriobacteriales	Eggerthellaceae	Raoultibacter	Raoultibacter massiliensis	GUT_GENOME147673	Eggerthella lenta_GUT_GENOME147673	80.3
clu_248	2	M248	UMGS124 sp. M248	Bacteria	Actinobacteria	Coriobacteriia	Coriobacteriales	UMGS124	UMGS124	Unknown	GUT_GENOME143514	Adlercreutzia equolifaciens_GUT_GENOME143514	75.6
clu_249	1	M249	UMGS124 sp. M249	Bacteria	Actinobacteria	Coriobacteriia	Coriobacteriales	UMGS124	UMGS124	Unknown	GUT_GENOME180129	Coriobacteriales_GUT_GENOME180129	77
clu_250	1	M250	UMGS124 sp. M250	Bacteria	Actinobacteria	Coriobacteriia	Coriobacteriales	UMGS124	UMGS124	Unknown	GUT_GENOME017973	Coriobacteriales_GUT_GENOME017973	78
clu_251	2	M251	QAMH01 sp. M251	Bacteria	Actinobacteria	Coriobacteriia	Coriobacteriales	QAMH01	QAMH01	Unknown	GUT_GENOME125939	QAMH01_GUT_GENOME125939	96.7
clu_252	2	M252	Senegalimassilia sp. M252	Bacteria	Actinobacteria	Coriobacteriia	Coriobacteriales	Eggerthellaceae	Senegalimassilia	Unknown	GUT_GENOME018678	Senegalimassilia_GUT_GENOME018678	97.3
clu_253	3	M253	Senegalimassilia anaerobia M253	Bacteria	Actinobacteria	Coriobacteriia	Coriobacteriales	Eggerthellaceae	Senegalimassilia	Senegalimassilia anaerobia	GUT_GENOME096234	Senegalimassilia anaerobia_GUT_GENOME096234	95.5
clu_254	1	M254	UMGS1773 sp. M254	Bacteria	Actinobacteria	Coriobacteriia	Coriobacteriales	Eggerthellaceae	UMGS1773	Unknown	GUT_GENOME254562	Eggerthellaceae_GUT_GENOME254562	96.5
clu_255	1	M255	Slackia equolifaciens M255	Bacteria	Actinobacteria	Coriobacteriia	Coriobacteriales	Eggerthellaceae	Slackia	Slackia equolifaciens	GUT_GENOME018318	Senegalimassilia_GUT_GENOME018318	78.9
clu_256	28	M256	Adlercreutzia equolifaciens M256	Bacteria	Actinobacteria	Coriobacteriia	Coriobacteriales	Eggerthellaceae	Adlercreutzia	Adlercreutzia equolifaciens	GUT_GENOME143514	Adlercreutzia equolifaciens_GUT_GENOME143514	96.2
clu_257	2	M257	Eggerthellaceae sp. M257	Bacteria	Actinobacteria	Coriobacteriia	Coriobacteriales	Eggerthellaceae	Unknown	Unknown	GUT_GENOME097845	Eggerthellaceae_GUT_GENOME097845	97.1
clu_258	1	M258	Eggerthellaceae sp. M258	Bacteria	Actinobacteria	Coriobacteriia	Coriobacteriales	Eggerthellaceae	Unknown	Unknown	GUT_GENOME256614	Eggerthellaceae_GUT_GENOME256614	97.2
clu_259	33	M259	Eggerthella lenta M259	Bacteria	Actinobacteria	Coriobacteriia	Coriobacteriales	Eggerthellaceae	Eggerthella	Eggerthella lenta	GUT_GENOME147673	Eggerthella lenta_GUT_GENOME147673	98.8
clu_260	7	M260	Gordonibacter pamelaeae M260	Bacteria	Actinobacteria	Coriobacteriia	Coriobacteriales	Eggerthellaceae	Gordonibacter	Gordonibacter pamelaeae	GUT_GENOME143632	Gordonibacter pamelaeae_GUT_GENOME143632	99.3
clu_261	2	M261	Gordonibacter massiliensis M261	Bacteria	Actinobacteria	Coriobacteriia	Coriobacteriales	Eggerthellaceae	Gordonibacter	Gordonibacter massiliensis	GUT_GENOME142593	Gordonibacter massiliensis_GUT_GENOME142593	97
clu_262	1	M262	Gordonibacter sp. M262	Bacteria	Actinobacteria	Coriobacteriia	Coriobacteriales	Eggerthellaceae	Gordonibacter	Unknown	GUT_GENOME143140	Gordonibacter_GUT_GENOME143140	96.6
clu_263	2	M263	Eggerthellaceae sp. M263	Bacteria	Actinobacteria	Coriobacteriia	Coriobacteriales	Eggerthellaceae	Unknown	Unknown	GUT_GENOME121668	Eggerthellaceae_GUT_GENOME121668	96.2
clu_264	7	M264	UMGS1293 sp. M264	Bacteria	Actinobacteria	Coriobacteriia	Coriobacteriales	Eggerthellaceae	UMGS1293	Unknown	GUT_GENOME018196	Eggerthellaceae_GUT_GENOME018196	97.6
clu_265	1	M265	D16-34 sp. M265	Bacteria	Actinobacteria	Coriobacteriia	Coriobacteriales	Eggerthellaceae	D16-34	Unknown	GUT_GENOME143514	Adlercreutzia equolifaciens_GUT_GENOME143514	80.8
clu_266	4	M266	Slackia piriformis M266	Bacteria	Actinobacteria	Coriobacteriia	Coriobacteriales	Eggerthellaceae	Slackia	Slackia piriformis	GUT_GENOME096274	Slackia_A piriformis_GUT_GENOME096274	96.6
clu_267	1	M267	Slackia sp. M267	Bacteria	Actinobacteria	Coriobacteriia	Coriobacteriales	Eggerthellaceae	Slackia	Unknown	GUT_GENOME100215	Slackia_A_GUT_GENOME100215	99.1
clu_268	1	M268	Slackia isoflavoniconvertens M268	Bacteria	Actinobacteria	Coriobacteriia	Coriobacteriales	Eggerthellaceae	Slackia	Slackia isoflavoniconvertens	GUT_GENOME145587	Slackia_A_GUT_GENOME145587	96.5
clu_269	1	M269	Alloscardovia omnicolens M269	Bacteria	Actinobacteria	Actinomycetia	Actinomycetales	Bifidobacteriaceae	Alloscardovia	Alloscardovia omnicolens	GUT_GENOME207408	Alloscardovia omnicolens_GUT_GENOME207408	98.5
clu_270	4	M270	CAG-115 sp. M270	Bacteria	Firmicutes	Clostridia	Oscillospirales	Ruminococcaceae	CAG-115	Unknown	GUT_GENOME007797	CAG-115 sp003531585_GUT_GENOME007797	98.5
clu_271	21	M271	Agathobaculum butyriciproducens M271	Bacteria	Firmicutes	Clostridia	Oscillospirales	Butyricicoccaceae	Agathobaculum	Agathobaculum butyriciproducens	GUT_GENOME001016	Agathobaculum butyriciproducens_GUT_GENOME001016	95.9
clu_272	7	M272	Agathobaculum sp. M272	Bacteria	Firmicutes	Clostridia	Oscillospirales	Butyricicoccaceae	Agathobaculum	Unknown	GUT_GENOME140268	Agathobaculum_GUT_GENOME140268	97.2
clu_273	1	M273	Agathobaculum sp. M273	Bacteria	Firmicutes	Clostridia	Oscillospirales	Butyricicoccaceae	Agathobaculum	Unknown	GUT_GENOME082932	Agathobaculum_GUT_GENOME082932	97.8
clu_274	1	M274	Agathobaculum sp. M274	Bacteria	Firmicutes	Clostridia	Oscillospirales	Butyricicoccaceae	Agathobaculum	Unknown	GUT_GENOME000266	Agathobaculum sp900291975_GUT_GENOME000266	98.4
clu_275	5	M275	UMGS1590 sp. M275	Bacteria	Firmicutes	Peptococcia	Peptococcales	Peptococcaceae	UMGS1590	Unknown	GUT_GENOME066597	Peptococcaceae_GUT_GENOME066597	96.8
clu_276	1	M276	CAG-45 sp. M276	Bacteria	Firmicutes	Clostridia	Lachnospirales	Lachnospiraceae	CAG-45	Unknown	GUT_GENOME000732	CAG-45 sp000438375_GUT_GENOME000732	98.5
clu_277	8	M277	Clostridium leptum M277	Bacteria	Firmicutes	Clostridia	Oscillospirales	Acutalibacteraceae	Clostridium	Clostridium leptum	GUT_GENOME000268	Clostridium_A leptum_GUT_GENOME000268	98.5
clu_278	2	M278	Acutalibacter sp. M278	Bacteria	Firmicutes	Clostridia	Oscillospirales	Acutalibacteraceae	Acutalibacter	Unknown	GUT_GENOME257098	Acutalibacter sp000435395_GUT_GENOME257098	98
clu_279	1	M279	Acutalibacter sp. M279	Bacteria	Firmicutes	Clostridia	Oscillospirales	Acutalibacteraceae	Acutalibacter	Unknown	GUT_GENOME139568	Acutalibacter_GUT_GENOME139568	98.1
clu_280	13	M280	CAG-217 sp. M280	Bacteria	Firmicutes	Clostridia	Oscillospirales	Acutalibacteraceae	CAG-217	Unknown	GUT_GENOME067489	CAG-217 sp000436335_GUT_GENOME067489	97
clu_281	2	M281	Blautia hydrogenotrophica M281	Bacteria	Firmicutes	Clostridia	Lachnospirales	Lachnospiraceae	Blautia	Blautia hydrogenotrophica	GUT_GENOME000139	Blautia_A hydrogenotrophica_GUT_GENOME000139	99.3
clu_282	5	M282	Roseburia hominis M282	Bacteria	Firmicutes	Clostridia	Lachnospirales	Lachnospiraceae	Roseburia	Roseburia hominis	GUT_GENOME145985	Roseburia hominis_GUT_GENOME145985	97.2
clu_283	1	M283	Lachnospira sp. M283	Bacteria	Firmicutes	Clostridia	Lachnospirales	Lachnospiraceae	Lachnospira	Unknown	GUT_GENOME017394	Lachnospira sp000437735_GUT_GENOME017394	98.2
clu_284	4	M284	Ruthenibacterium sp. M284	Bacteria	Firmicutes	Clostridia	Oscillospirales	Ruminococcaceae	Ruthenibacterium	Unknown	GUT_GENOME131908	Ruthenibacterium_GUT_GENOME131908	98.7
clu_285	27	M285	Ruthenibacterium lactatiformans M285	Bacteria	Firmicutes	Clostridia	Oscillospirales	Ruminococcaceae	Ruthenibacterium	Ruthenibacterium lactatiformans	GUT_GENOME239663	Ruthenibacterium lactatiformans_GUT_GENOME239663	97.8
clu_286	1	M286	Eubacterium sp. M286	Bacteria	Firmicutes	Clostridia	Lachnospirales	Lachnospiraceae	Eubacterium	Unknown	GUT_GENOME001241	Eubacterium_F sp003491505_GUT_GENOME001241	97.9
clu_287	1	M287	GCA-900066135 sp. M287	Bacteria	Firmicutes	Clostridia	Lachnospirales	Lachnospiraceae	GCA-900066135	Unknown	GUT_GENOME226927	GCA-900066135_GUT_GENOME226927	98.4
clu_288	1	M288	CAG-74 sp. M288	Bacteria	Firmicutes	Clostridia	Christensenellales	CAG-74	Unknown	Unknown	GUT_GENOME121384	CAG-74_GUT_GENOME121384	85.4
clu_289	2	M289	ER4 sp. M289	Bacteria	Firmicutes	Clostridia	Oscillospirales	Oscillospiraceae	ER4	Unknown	GUT_GENOME159035	ER4 sp900317525_GUT_GENOME159035	97.1
clu_290	2	M290	ER4 sp. M290	Bacteria	Firmicutes	Clostridia	Oscillospirales	Oscillospiraceae	ER4	Unknown	GUT_GENOME262636	ER4_GUT_GENOME262636	97.5
clu_291	8	M291	ER4 sp. M291	Bacteria	Firmicutes	Clostridia	Oscillospirales	Oscillospiraceae	ER4	Unknown	GUT_GENOME239684	ER4 sp000765235_GUT_GENOME239684	97.1
clu_292	4	M292	CAG-110 sp. M292	Bacteria	Firmicutes	Clostridia	Oscillospirales	Oscillospiraceae	CAG-110	Unknown	GUT_GENOME125250	CAG-110 sp003525905_GUT_GENOME125250	98.3
clu_293	1	M293	CAG-170 sp. M293	Bacteria	Firmicutes	Clostridia	Oscillospirales	Oscillospiraceae	CAG-170	Unknown	GUT_GENOME020571	CAG-170 sp002404795_GUT_GENOME020571	97.9
clu_294	1	M294	CAG-170 sp. M294	Bacteria	Firmicutes	Clostridia	Oscillospirales	Oscillospiraceae	CAG-170	Unknown	GUT_GENOME192801	CAG-170 sp000432135_GUT_GENOME192801	97.6
clu_295	1	M295	CAG-170 sp. M295	Bacteria	Firmicutes	Clostridia	Oscillospirales	Oscillospiraceae	CAG-170	Unknown	GUT_GENOME122482	CAG-170_GUT_GENOME122482	98.5
clu_296	2	M296	CAG-103 sp. M296	Bacteria	Firmicutes	Clostridia	Oscillospirales	Oscillospiraceae	CAG-103	Unknown	GUT_GENOME084706	CAG-103_GUT_GENOME084706	97.1
clu_297	2	M297	CAG-103 sp. M297	Bacteria	Firmicutes	Clostridia	Oscillospirales	Oscillospiraceae	CAG-103	Unknown	GUT_GENOME096701	CAG-103 sp900317855_GUT_GENOME096701	97.1
clu_298	5	M298	CAG-103 sp. M298	Bacteria	Firmicutes	Clostridia	Oscillospirales	Oscillospiraceae	CAG-103	Unknown	GUT_GENOME280620	CAG-103 sp000432375_GUT_GENOME280620	98.7
clu_299	2	M299	CAG-103 sp. M299	Bacteria	Firmicutes	Clostridia	Oscillospirales	Oscillospiraceae	CAG-103	Unknown	GUT_GENOME043942	CAG-103 sp900317855_GUT_GENOME043942	97.9
clu_300	3	M300	UBA738 sp. M300	Bacteria	Firmicutes	Clostridia	Oscillospirales	Oscillospiraceae	UBA738	Unknown	GUT_GENOME257298	UBA738 sp003522945_GUT_GENOME257298	97.6
clu_301	1	M301	UBA1777 sp. M301	Bacteria	Firmicutes	Clostridia	Oscillospirales	Oscillospiraceae	UBA1777	Unknown	GUT_GENOME255258	UBA1777 sp003150355_GUT_GENOME255258	97.4
clu_302	3	M302	CAG-83 sp. M302	Bacteria	Firmicutes	Clostridia	Oscillospirales	Oscillospiraceae	CAG-83	Unknown	GUT_GENOME255646	CAG-83_GUT_GENOME255646	98.4
clu_303	1	M303	CAG-83 sp. M303	Bacteria	Firmicutes	Clostridia	Oscillospirales	Oscillospiraceae	CAG-83	Unknown	GUT_GENOME277106	CAG-83_GUT_GENOME277106	98.2
clu_304	1	M304	CAG-83 sp. M304	Bacteria	Firmicutes	Clostridia	Oscillospirales	Oscillospiraceae	CAG-83	Unknown	GUT_GENOME130774	CAG-83_GUT_GENOME130774	97.8
clu_305	2	M305	CAG-83 sp. M305	Bacteria	Firmicutes	Clostridia	Oscillospirales	Oscillospiraceae	CAG-83	Unknown	GUT_GENOME159485	CAG-83 sp000435555_GUT_GENOME159485	96.9
clu_306	1	M306	CAG-83 sp. M306	Bacteria	Firmicutes	Clostridia	Oscillospirales	Oscillospiraceae	CAG-83	Unknown	GUT_GENOME130814	CAG-83_GUT_GENOME130814	97.7
clu_307	7	M307	CAG-83 sp. M307	Bacteria	Firmicutes	Clostridia	Oscillospirales	Oscillospiraceae	CAG-83	Unknown	GUT_GENOME180274	CAG-83 sp000431575_GUT_GENOME180274	97.4
clu_308	7	M308	CAG-83 sp. M308	Bacteria	Firmicutes	Clostridia	Oscillospirales	Oscillospiraceae	CAG-83	Unknown	GUT_GENOME259135	CAG-83 sp001916855_GUT_GENOME259135	97.7
clu_309	1	M309	CAG-83 sp. M309	Bacteria	Firmicutes	Clostridia	Oscillospirales	Oscillospiraceae	CAG-83	Unknown	GUT_GENOME176098	CAG-83 sp000435975_GUT_GENOME176098	99.4
clu_310	1	M310	CAG-83 sp. M310	Bacteria	Firmicutes	Clostridia	Oscillospirales	Oscillospiraceae	CAG-83	Unknown	GUT_GENOME276106	CAG-83_GUT_GENOME276106	97
clu_311	8	M311	Oscillibacter welbionis M311	Bacteria	Firmicutes	Clostridia	Oscillospirales	Oscillospiraceae	Oscillibacter	Oscillibacter welbionis	GUT_GENOME141047	Oscillibacter sp900066435_GUT_GENOME141047	98.1
clu_312	2	M312	Lawsonibacter sp. M312	Bacteria	Firmicutes	Clostridia	Oscillospirales	Oscillospiraceae	Lawsonibacter	Unknown	GUT_GENOME096144	Lawsonibacter sp000177015_GUT_GENOME096144	96.2
clu_313	1	M313	Lawsonibacter sp. M313	Bacteria	Firmicutes	Clostridia	Oscillospirales	Oscillospiraceae	Lawsonibacter	Unknown	GUT_GENOME000269	Lawsonibacter sp900066825_GUT_GENOME000269	97.6
clu_314	10	M314	Flavonifractor plautii M314	Bacteria	Firmicutes	Clostridia	Oscillospirales	Oscillospiraceae	Flavonifractor	Flavonifractor plautii	GUT_GENOME000518	Flavonifractor plautii_GUT_GENOME000518	98.2
clu_315	1	M315	Intestinimonas butyriciproducens M315	Bacteria	Firmicutes	Clostridia	Oscillospirales	Oscillospiraceae	Intestinimonas	Intestinimonas butyriciproducens	GUT_GENOME141226	Intestinimonas butyriciproducens_GUT_GENOME141226	98.4
clu_316	6	M316	Evtepia sp. M316	Bacteria	Firmicutes	Clostridia	Oscillospirales	Oscillospiraceae	Evtepia	Unknown	GUT_GENOME093609	Ruminiclostridium_C_GUT_GENOME093609	96.9
clu_317	16	M317	Evtepia gabavorous M317	Bacteria	Firmicutes	Clostridia	Oscillospirales	Oscillospiraceae	Evtepia	Evtepia gabavorous	GUT_GENOME143189	Ruminiclostridium_C sp000435295_GUT_GENOME143189	99
clu_318	2	M318	Evtepia sp. M318	Bacteria	Firmicutes	Clostridia	Oscillospirales	Oscillospiraceae	Evtepia	Unknown	GUT_GENOME258247	Ruminiclostridium_C_GUT_GENOME258247	86.1
clu_319	3	M319	Evtepia sp. M319	Bacteria	Firmicutes	Clostridia	Oscillospirales	Oscillospiraceae	Evtepia	Unknown	GUT_GENOME258247	Ruminiclostridium_C_GUT_GENOME258247	98
clu_320	1	M320	CAG-81 sp. M320	Bacteria	Firmicutes	Clostridia	Lachnospirales	Lachnospiraceae	CAG-81	Unknown	GUT_GENOME092065	Lachnospiraceae_GUT_GENOME092065	97.4
clu_321	1	M321	UMGS1603 sp. M321	Bacteria	Firmicutes	Clostridia	Christensenellales	CAG-74	UMGS1603	Unknown	GUT_GENOME111334	CAG-74_GUT_GENOME111334	98.2
clu_322	5	M322	Ruminococcus sp. M322	Bacteria	Firmicutes	Clostridia	Oscillospirales	Acutalibacteraceae	Ruminococcus	Unknown	GUT_GENOME238522	UBA1417 sp003531055_GUT_GENOME238522	97.6
clu_323	3	M323	Ruminococcus sp. M323	Bacteria	Firmicutes	Clostridia	Oscillospirales	Acutalibacteraceae	Ruminococcus	Unknown	GUT_GENOME197527	UBA1417_GUT_GENOME197527	97
clu_324	8	M324	Ruminococcus bicirculans M324	Bacteria	Firmicutes	Clostridia	Oscillospirales	Ruminococcaceae	Ruminococcus	Ruminococcus bicirculans	GUT_GENOME140786	Ruminococcus_D bicirculans_GUT_GENOME140786	97.2
clu_325	1	M325	Ruminococcus sp. M325	Bacteria	Firmicutes	Clostridia	Oscillospirales	Ruminococcaceae	Ruminococcus	Unknown	GUT_GENOME263370	Ruminococcus_D sp000434695_GUT_GENOME263370	97.9
clu_326	1	M326	Catabacter hongkongensis M326	Bacteria	Firmicutes	Clostridia	Christensenellales	Christensenellaceae	Catabacter	Catabacter hongkongensis	GUT_GENOME097725	Catabacter hongkongensis_GUT_GENOME097725	99.6
clu_327	1	M327	UMGS1338 sp. M327	Bacteria	Firmicutes	Clostridia	Christensenellales	QALW01	UMGS1338	Unknown	GUT_GENOME251968	QALW01_GUT_GENOME251968	98.5
clu_328	1	M328	CAG-353 sp. M328	Bacteria	Firmicutes	Clostridia	Oscillospirales	Ruminococcaceae	CAG-353	Unknown	GUT_GENOME000448	CAG-353 sp900066885_GUT_GENOME000448	98.2
clu_329	1	M329	NK3B98 sp. M329	Bacteria	Firmicutes	Clostridia	Oscillospirales	Oscillospiraceae	NK3B98	Unknown	GUT_GENOME261291	NK3B98_GUT_GENOME261291	98.1
clu_330	7	M330	Faecalibacterium prausnitzii M330	Bacteria	Firmicutes	Clostridia	Oscillospirales	Ruminococcaceae	Faecalibacterium	Faecalibacterium prausnitzii	GUT_GENOME095967	Faecalibacterium prausnitzii_K_GUT_GENOME095967	97.2
clu_331	12	M331	Faecalibacterium sp. M331	Bacteria	Firmicutes	Clostridia	Oscillospirales	Ruminococcaceae	Faecalibacterium	Unknown	GUT_GENOME247791	Faecalibacterium_GUT_GENOME247791	98
clu_332	13	M332	Faecalibacterium prausnitzii M332	Bacteria	Firmicutes	Clostridia	Oscillospirales	Ruminococcaceae	Faecalibacterium	Faecalibacterium prausnitzii	GUT_GENOME140074	Faecalibacterium prausnitzii_D_GUT_GENOME140074	97
clu_333	3	M333	Faecalibacterium prausnitzii M333	Bacteria	Firmicutes	Clostridia	Oscillospirales	Ruminococcaceae	Faecalibacterium	Faecalibacterium prausnitzii	GUT_GENOME001115	Faecalibacterium prausnitzii_E_GUT_GENOME001115	98
clu_334	11	M334	Faecalibacterium prausnitzii M334	Bacteria	Firmicutes	Clostridia	Oscillospirales	Ruminococcaceae	Faecalibacterium	Faecalibacterium prausnitzii	GUT_GENOME000092	Faecalibacterium prausnitzii_C_GUT_GENOME000092	96
clu_335	3	M335	Faecalibacterium prausnitzii M335	Bacteria	Firmicutes	Clostridia	Oscillospirales	Ruminococcaceae	Faecalibacterium	Faecalibacterium prausnitzii	GUT_GENOME140078	Faecalibacterium prausnitzii_I_GUT_GENOME140078	97.8
clu_336	28	M336	Faecalibacterium prausnitzii M336	Bacteria	Firmicutes	Clostridia	Oscillospirales	Ruminococcaceae	Faecalibacterium	Faecalibacterium prausnitzii	GUT_GENOME147678	Faecalibacterium prausnitzii_G_GUT_GENOME147678	96.8
clu_337	14	M337	Gemmiger sp. M337	Bacteria	Firmicutes	Clostridia	Oscillospirales	Ruminococcaceae	Gemmiger	Unknown	GUT_GENOME098909	Gemmiger_GUT_GENOME098909	98.1
clu_338	22	M338	Gemmiger formicilis M338	Bacteria	Firmicutes	Clostridia	Oscillospirales	Ruminococcaceae	Gemmiger	Gemmiger formicilis	GUT_GENOME000367	Gemmiger formicilis_GUT_GENOME000367	97.2
clu_339	2	M339	Gemmiger sp. M339	Bacteria	Firmicutes	Clostridia	Oscillospirales	Ruminococcaceae	Gemmiger	Unknown	GUT_GENOME087442	Gemmiger_GUT_GENOME087442	97.3
clu_340	8	M340	Gemmiger sp. M340	Bacteria	Firmicutes	Clostridia	Oscillospirales	Ruminococcaceae	Gemmiger	Unknown	GUT_GENOME250439	Gemmiger_GUT_GENOME250439	95.5
clu_341	41	M341	Gemmiger qucibialis M341	Bacteria	Firmicutes	Clostridia	Oscillospirales	Ruminococcaceae	Gemmiger	Gemmiger qucibialis	GUT_GENOME251083	Gemmiger sp003476825_GUT_GENOME251083	98.3
clu_342	1	M342	Gemmiger sp. M342	Bacteria	Firmicutes	Clostridia	Oscillospirales	Ruminococcaceae	Gemmiger	Unknown	GUT_GENOME107146	Gemmiger_GUT_GENOME107146	87.2
clu_343	2	M343	Mitsuokella multacida M343	Bacteria	Firmicutes	Negativicutes	Selenomonadales	Selenomonadaceae	Mitsuokella	Mitsuokella multacida	GUT_GENOME095994	Mitsuokella multacida_GUT_GENOME095994	96.4
clu_344	1	M344	Angelakisella sp. M344	Bacteria	Firmicutes	Clostridia	Oscillospirales	Ruminococcaceae	Angelakisella	Unknown	GUT_GENOME256593	Angelakisella_GUT_GENOME256593	97.4
clu_345	1	M345	Cloacibacillus evryensis M345	Bacteria	Synergistetes	Synergistia	Synergistales	Synergistaceae	Cloacibacillus	Cloacibacillus evryensis	GUT_GENOME096236	Cloacibacillus evryensis_GUT_GENOME096236	98.3
clu_346	1	M346	Cloacibacillus porcorum M346	Bacteria	Synergistetes	Synergistia	Synergistales	Synergistaceae	Cloacibacillus	Cloacibacillus porcorum	GUT_GENOME098156	Cloacibacillus porcorum_GUT_GENOME098156	98.7
clu_347	3	M347	Phascolarctobacterium succinatutens M347	Bacteria	Firmicutes	Negativicutes	Acidaminococcales	Acidaminococcaceae	Phascolarctobacterium	Phascolarctobacterium succinatutens	GUT_GENOME096175	Phascolarctobacterium_A succinatutens_GUT_GENOME096175	95.2
clu_348	1	M348	Phascolarctobacterium sp. M348	Bacteria	Firmicutes	Negativicutes	Acidaminococcales	Acidaminococcaceae	Phascolarctobacterium	Unknown	GUT_GENOME014854	Phascolarctobacterium_A_GUT_GENOME014854	97.1
clu_349	13	M349	Phascolarctobacterium faecium M349	Bacteria	Firmicutes	Negativicutes	Acidaminococcales	Acidaminococcaceae	Phascolarctobacterium	Phascolarctobacterium faecium	GUT_GENOME233517	Phascolarctobacterium faecium_GUT_GENOME233517	98.1
clu_350	23	M350	Bilophila wadsworthia M350	Bacteria	Desulfobacterota	Desulfovibrionia	Desulfovibrionales	Desulfovibrionaceae	Bilophila	Bilophila wadsworthia	GUT_GENOME096166	Bilophila wadsworthia_GUT_GENOME096166	97
clu_351	9	M351	Desulfovibrio sp. M351	Bacteria	Desulfobacterota	Desulfovibrionia	Desulfovibrionales	Desulfovibrionaceae	Desulfovibrio	Unknown	GUT_GENOME096004	Desulfovibrio piger_GUT_GENOME096004	95.7
clu_352	1	M352	Desulfovibrio legallii M352	Bacteria	Desulfobacterota	Desulfovibrionia	Desulfovibrionales	Desulfovibrionaceae	Desulfovibrio	Desulfovibrio legallii	GUT_GENOME001443	Desulfovibrio_GUT_GENOME001443	99.5
clu_353	1	M353	SFMI01 sp. M353	Bacteria	Firmicutes	Clostridia	Christensenellales	CAG-74	SFMI01	Unknown	GUT_GENOME254918	CAG-74_GUT_GENOME254918	98.2
clu_354	1	M354	Oscillospirales sp. M354	Bacteria	Firmicutes	Clostridia	Oscillospirales	Unknown	Unknown	Unknown	GUT_GENOME014039	Faecalibacterium_GUT_GENOME014039	78
clu_355	4	M355	Firm-11 sp. M355	Bacteria	Firmicutes	Clostridia	Christensenellales	CAG-74	Firm-11	Unknown	GUT_GENOME246789	CAG-74_GUT_GENOME246789	98.1
clu_356	1	M356	Firm-11 sp. M356	Bacteria	Firmicutes	Clostridia	Christensenellales	CAG-74	Firm-11	Unknown	GUT_GENOME127776	CAG-74_GUT_GENOME127776	97.8
clu_357	4	M357	SFFH01 sp. M357	Bacteria	Firmicutes	Clostridia	Christensenellales	CAG-74	SFFH01	Unknown	GUT_GENOME215193	CAG-74_GUT_GENOME215193	98.4
clu_358	6	M358	SFFH01 sp. M358	Bacteria	Firmicutes	Clostridia	Christensenellales	CAG-74	SFFH01	Unknown	GUT_GENOME125875	CAG-74_GUT_GENOME125875	97.2
clu_359	7	M359	UBA11524 sp. M359	Bacteria	Firmicutes	Clostridia	Christensenellales	CAG-74	UBA11524	Unknown	GUT_GENOME247421	UBA11524 sp000437595_GUT_GENOME247421	97.6
clu_360	1	M360	D5 sp. M360	Bacteria	Firmicutes	Clostridia	Oscillospirales	Ruminococcaceae	D5	Unknown	GUT_GENOME093693	D5 sp900113995_GUT_GENOME093693	99.1
clu_361	2	M361	Parasutterella sp. M361	Bacteria	Proteobacteria	Gammaproteobacteria	Burkholderiales	Burkholderiaceae	Parasutterella	Unknown	GUT_GENOME195667	Parasutterella sp000980495_GUT_GENOME195667	98.7
clu_362	1	M362	Parasutterella excrementihominis M362	Bacteria	Proteobacteria	Gammaproteobacteria	Burkholderiales	Burkholderiaceae	Parasutterella	Parasutterella excrementihominis	GUT_GENOME095941	Parasutterella excrementihominis_GUT_GENOME095941	98.6
clu_363	5	M363	Prevotella copri M363	Bacteria	Bacteroidetes	Bacteroidia	Bacteroidales	Bacteroidaceae	Prevotella	Prevotella copri	GUT_GENOME140299	Prevotella copri_GUT_GENOME140299	96
clu_364	1	M364	Prevotella copri M364	Bacteria	Bacteroidetes	Bacteroidia	Bacteroidales	Bacteroidaceae	Prevotella	Prevotella copri	GUT_GENOME239747	Prevotella copri_A_GUT_GENOME239747	97.1
clu_365	3	M365	Prevotella stercorea M365	Bacteria	Bacteroidetes	Bacteroidia	Bacteroidales	Bacteroidaceae	Prevotella	Prevotella stercorea	GUT_GENOME001282	Prevotella stercorea_GUT_GENOME001282	96.9
clu_366	1	M366	Prevotellamassilia sp. M366	Bacteria	Bacteroidetes	Bacteroidia	Bacteroidales	Bacteroidaceae	Prevotellamassilia	Unknown	GUT_GENOME181333	Prevotellamassilia_GUT_GENOME181333	97.9
clu_367	1	M367	Prevotella bivia M367	Bacteria	Bacteroidetes	Bacteroidia	Bacteroidales	Bacteroidaceae	Prevotella	Prevotella bivia	GUT_GENOME231503	Prevotella bivia_GUT_GENOME231503	98.7
clu_368	1	M368	RC9 sp. M368	Bacteria	Bacteroidetes	Bacteroidia	Bacteroidales	UBA932	RC9	Unknown	GUT_GENOME018576	RC9 sp000433355_GUT_GENOME018576	98
clu_369	1	M369	RC9 sp. M369	Bacteria	Bacteroidetes	Bacteroidia	Bacteroidales	UBA932	RC9	Unknown	GUT_GENOME017944	RC9_GUT_GENOME017944	97.8
clu_370	2	M370	Alistipes ihumii M370	Bacteria	Bacteroidetes	Bacteroidia	Bacteroidales	Rikenellaceae	Alistipes	Alistipes ihumii	GUT_GENOME096301	Alistipes_A ihumii_GUT_GENOME096301	98
clu_371	5	M371	Alistipes sp. M371	Bacteria	Bacteroidetes	Bacteroidia	Bacteroidales	Rikenellaceae	Alistipes	Unknown	GUT_GENOME000899	Alistipes_A sp900240235_GUT_GENOME000899	98.5
clu_372	18	M372	Alistipes putredinis M372	Bacteria	Bacteroidetes	Bacteroidia	Bacteroidales	Rikenellaceae	Alistipes	Alistipes putredinis	GUT_GENOME095971	Alistipes putredinis_GUT_GENOME095971	98.8
clu_373	6	M373	Alistipes shahii M373	Bacteria	Bacteroidetes	Bacteroidia	Bacteroidales	Rikenellaceae	Alistipes	Alistipes shahii	GUT_GENOME000008	Alistipes shahii_GUT_GENOME000008	98.1
clu_374	4	M374	Alistipes finegoldii M374	Bacteria	Bacteroidetes	Bacteroidia	Bacteroidales	Rikenellaceae	Alistipes	Alistipes finegoldii	GUT_GENOME111543	Alistipes finegoldii_GUT_GENOME111543	97.2
clu_375	6	M375	Alistipes onderdonkii M375	Bacteria	Bacteroidetes	Bacteroidia	Bacteroidales	Rikenellaceae	Alistipes	Alistipes onderdonkii	GUT_GENOME000285	Alistipes onderdonkii_GUT_GENOME000285	97.8
clu_376	1	M376	Alistipes obesi M376	Bacteria	Bacteroidetes	Bacteroidia	Bacteroidales	Rikenellaceae	Alistipes	Alistipes obesi	GUT_GENOME096286	Alistipes obesi_GUT_GENOME096286	98.6
clu_377	3	M377	Paraprevotella clara M377	Bacteria	Bacteroidetes	Bacteroidia	Bacteroidales	Bacteroidaceae	Paraprevotella	Paraprevotella clara	GUT_GENOME147612	Paraprevotella clara_GUT_GENOME147612	97.7
clu_378	1	M378	Paraprevotella xylaniphila M378	Bacteria	Bacteroidetes	Bacteroidia	Bacteroidales	Bacteroidaceae	Paraprevotella	Paraprevotella xylaniphila	GUT_GENOME096191	Paraprevotella xylaniphila_GUT_GENOME096191	98.3
clu_379	12	M379	Parabacteroides distasonis M379	Bacteria	Bacteroidetes	Bacteroidia	Bacteroidales	Tannerellaceae	Parabacteroides	Parabacteroides distasonis	GUT_GENOME143131	Parabacteroides distasonis_GUT_GENOME143131	98.8
clu_380	2	M380	Parabacteroides goldsteinii M380	Bacteria	Bacteroidetes	Bacteroidia	Bacteroidales	Tannerellaceae	Parabacteroides	Parabacteroides goldsteinii	GUT_GENOME096473	Parabacteroides goldsteinii_GUT_GENOME096473	98.2
clu_381	7	M381	Parabacteroides merdae M381	Bacteria	Bacteroidetes	Bacteroidia	Bacteroidales	Tannerellaceae	Parabacteroides	Parabacteroides merdae	GUT_GENOME000192	Parabacteroides merdae_GUT_GENOME000192	97.8
clu_382	4	M382	CAG-279 sp. M382	Bacteria	Bacteroidetes	Bacteroidia	Bacteroidales	Muribaculaceae	CAG-279	Unknown	GUT_GENOME148897	CAG-279 sp000437795_GUT_GENOME148897	98.1
clu_383	1	M383	CAG-873 sp. M383	Bacteria	Bacteroidetes	Bacteroidia	Bacteroidales	Muribaculaceae	CAG-873	Unknown	GUT_GENOME274864	CAG-873_GUT_GENOME274864	98
clu_384	1	M384	CAG-279 sp. M384	Bacteria	Bacteroidetes	Bacteroidia	Bacteroidales	Muribaculaceae	CAG-279	Unknown	GUT_GENOME017597	CAG-279_GUT_GENOME017597	98.1
clu_385	1	M385	CAG-1031 sp. M385	Bacteria	Bacteroidetes	Bacteroidia	Bacteroidales	Muribaculaceae	CAG-1031	Unknown	GUT_GENOME049084	CAG-1031 sp000431215_GUT_GENOME049084	97.9
clu_386	3	M386	Barnesiella intestinihominis M386	Bacteria	Bacteroidetes	Bacteroidia	Bacteroidales	Barnesiellaceae	Barnesiella	Barnesiella intestinihominis	GUT_GENOME000682	Barnesiella intestinihominis_GUT_GENOME000682	97.5
clu_387	1	M387	Tidjanibacter inops M387	Bacteria	Bacteroidetes	Bacteroidia	Bacteroidales	Rikenellaceae	Tidjanibacter	Tidjanibacter inops	GUT_GENOME142390	Tidjanibacter inops_GUT_GENOME142390	98.8
clu_388	5	M388	Phocaeicola sp. M388	Bacteria	Bacteroidetes	Bacteroidia	Bacteroidales	Bacteroidaceae	Phocaeicola	Unknown	GUT_GENOME095979	Bacteroides_A coprocola_GUT_GENOME095979	97.2
clu_389	7	M389	Phocaeicola plebeius M389	Bacteria	Bacteroidetes	Bacteroidia	Bacteroidales	Bacteroidaceae	Phocaeicola	Phocaeicola plebeius	GUT_GENOME239725	Bacteroides_A plebeius_A_GUT_GENOME239725	97.5
clu_390	1	M390	Phocaeicola barnesiae M390	Bacteria	Bacteroidetes	Bacteroidia	Bacteroidales	Bacteroidaceae	Phocaeicola	Phocaeicola barnesiae	GUT_GENOME205656	Bacteroides_A barnesiae_GUT_GENOME205656	97.9
clu_391	1	M391	Phocaeicola coprophilus M391	Bacteria	Bacteroidetes	Bacteroidia	Bacteroidales	Bacteroidaceae	Phocaeicola	Phocaeicola coprophilus	GUT_GENOME001778	Bacteroides_A coprophilus_GUT_GENOME001778	98.6
clu_392	6	M392	Bacteroides fragilis M392	Bacteria	Bacteroidetes	Bacteroidia	Bacteroidales	Bacteroidaceae	Bacteroides	Bacteroides fragilis	GUT_GENOME096063	Bacteroides fragilis_GUT_GENOME096063	98.7
clu_393	1	M393	Bacteroides fragilis M393	Bacteria	Bacteroidetes	Bacteroidia	Bacteroidales	Bacteroidaceae	Bacteroides	Bacteroides fragilis	GUT_GENOME001418	Bacteroides fragilis_A_GUT_GENOME001418	98
clu_394	2	M394	Bacteroides thetaiotaomicron M394	Bacteria	Bacteroidetes	Bacteroidia	Bacteroidales	Bacteroidaceae	Bacteroides	Bacteroides thetaiotaomicron	GUT_GENOME001120	Bacteroides thetaiotaomicron_GUT_GENOME001120	98.5
clu_395	1	M395	Bacteroides faecis M395	Bacteria	Bacteroidetes	Bacteroidia	Bacteroidales	Bacteroidaceae	Bacteroides	Bacteroides faecis	GUT_GENOME140240	Bacteroides faecis_GUT_GENOME140240	99.5
clu_396	3	M396	Bacteroides caccae M396	Bacteria	Bacteroidetes	Bacteroidia	Bacteroidales	Bacteroidaceae	Bacteroides	Bacteroides caccae	GUT_GENOME147854	Bacteroides caccae_GUT_GENOME147854	98.2
clu_397	3	M397	Bacteroides ovatus M397	Bacteria	Bacteroidetes	Bacteroidia	Bacteroidales	Bacteroidaceae	Bacteroides	Bacteroides ovatus	GUT_GENOME096203	Bacteroides ovatus_GUT_GENOME096203	97.1
clu_398	1	M398	Bacteroides sp. M398	Bacteria	Bacteroidetes	Bacteroidia	Bacteroidales	Bacteroidaceae	Bacteroides	Unknown	GUT_GENOME096203	Bacteroides ovatus_GUT_GENOME096203	95.1
clu_399	3	M399	Phocaeicola dorei M399	Bacteria	Bacteroidetes	Bacteroidia	Bacteroidales	Bacteroidaceae	Phocaeicola	Phocaeicola dorei	GUT_GENOME143505	Bacteroides_B dorei_GUT_GENOME143505	98.6
clu_400	10	M400	Phocaeicola vulgatus M400	Bacteria	Bacteroidetes	Bacteroidia	Bacteroidales	Bacteroidaceae	Phocaeicola	Phocaeicola vulgatus	GUT_GENOME143505	Bacteroides_B dorei_GUT_GENOME143505	94.5
clu_401	1	M401	Phocaeicola sartorii M401	Bacteria	Bacteroidetes	Bacteroidia	Bacteroidales	Bacteroidaceae	Phocaeicola	Phocaeicola sartorii	GUT_GENOME102353	Bacteroides_B sartorii_GUT_GENOME102353	98.3
clu_402	1	M402	Phocaeicola massiliensis M402	Bacteria	Bacteroidetes	Bacteroidia	Bacteroidales	Bacteroidaceae	Phocaeicola	Phocaeicola massiliensis	GUT_GENOME001488	Bacteroides_B massiliensis_GUT_GENOME001488	98.7
clu_403	22	M403	Bacteroides uniformis M403	Bacteria	Bacteroidetes	Bacteroidia	Bacteroidales	Bacteroidaceae	Bacteroides	Bacteroides uniformis	GUT_GENOME096083	Bacteroides uniformis_GUT_GENOME096083	98.1
clu_404	6	M404	Bacteroides stercoris M404	Bacteria	Bacteroidetes	Bacteroidia	Bacteroidales	Bacteroidaceae	Bacteroides	Bacteroides stercoris	GUT_GENOME239662	Bacteroides stercoris_GUT_GENOME239662	97.9
clu_405	1	M405	Bacteroides ndongoniae M405	Bacteria	Bacteroidetes	Bacteroidia	Bacteroidales	Bacteroidaceae	Bacteroides	Bacteroides ndongoniae	GUT_GENOME155674	Bacteroides ndongoniae_GUT_GENOME155674	97.7
clu_406	1	M406	Desulfovibrio sp. M406	Bacteria	Desulfobacterota	Desulfovibrionia	Desulfovibrionales	Desulfovibrionaceae	Desulfovibrio	Unknown	GUT_GENOME186342	Desulfovibrio sp900319575_GUT_GENOME186342	98.2
