# Supplementary material for: Deep metagenomic characterization of gut microbial community and function in preeclampsia
Source: Front Cell Infect Microbiol. 2022 Sep 14;12:933523. doi: 10.3389/fcimb.2022.933523 (PMC9515455; doi:10.3389/fcimb.2022.933523)
Supplement: Supplementary file 4 [file Table_4.xlsx]

## Sheet: ST4
Table S4| Detailed information of 74 PE-associated species.
Species ID	Species name	Avg. abundance in healthy controls	Avg. abundance in PE patients	P-value	q	Fold change	Enriched in	Phylum	Family	Genus	Species
M023	Sporosarcina sp. M023	0.00463912	5.68842e-06	0.0289287	0.0878203	815.539	CN	Firmicutes	Planococcaceae	Sporosarcina	Sporosarcina sp.
M075	Anaerostipes caccae M075	0.00318322	0.00211065	0.00694547	0.0374839	1.50817	CN	Firmicutes	Lachnospiraceae	Anaerostipes	Anaerostipes caccae
M130	Phil1 sp. M130	0.000608722	0.000239058	0.00839054	0.0407545	2.54634	CN	Firmicutes	CAG-138	Phil1	Phil1 sp.
M134	CAG-274 sp. M134	0.000540312	0.000128351	0.0192187	0.0669805	4.20963	CN	Firmicutes	CAG-274	CAG-274	CAG-274 sp.
M195	Eubacterium sp. M195	0.000311941	1.8757e-05	0.0469467	0.122023	16.6307	CN	Firmicutes	Anaerovoracaceae	Eubacterium	Eubacterium sp.
M200	Megasphaera sp. M200	0.000225153	1.22782e-06	0.00359753	0.0276032	183.376	CN	Firmicutes	Megasphaeraceae	Megasphaera	Megasphaera sp.
M201	Megasphaera sp. M201	0.000268001	6.69365e-05	0.0107079	0.0452752	4.00381	CN	Firmicutes	Megasphaeraceae	Megasphaera	Megasphaera sp.
M202	Akkermansia muciniphila M202	0.0128729	0.00283061	0.0389589	0.107099	4.54775	CN	Verrucomicrobia	Akkermansiaceae	Akkermansia	Akkermansia muciniphila
M285	Ruthenibacterium lactatiformans M285	0.00797047	0.00242377	0.0435989	0.115917	3.28846	CN	Firmicutes	Ruminococcaceae	Ruthenibacterium	Ruthenibacterium lactatiformans
M311	Oscillibacter welbionis M311	0.00245436	0.000841639	0.00763781	0.039137	2.91617	CN	Firmicutes	Oscillospiraceae	Oscillibacter	Oscillibacter welbionis
M313	Lawsonibacter sp. M313	0.000383981	0.000136858	0.00788179	0.0396805	2.80569	CN	Firmicutes	Oscillospiraceae	Lawsonibacter	Lawsonibacter sp.
M314	Flavonifractor plautii M314	0.00256287	0.000799986	4.00918e-05	0.00259645	3.20364	CN	Firmicutes	Oscillospiraceae	Flavonifractor	Flavonifractor plautii
M349	Phascolarctobacterium faecium M349	0.00339551	0.0015576	0.0111211	0.0459724	2.17996	CN	Firmicutes	Acidaminococcaceae	Phascolarctobacterium	Phascolarctobacterium faecium
M350	Bilophila wadsworthia M350	0.00565586	0.00339194	0.0097913	0.0436346	1.66744	CN	Desulfobacterota	Desulfovibrionaceae	Bilophila	Bilophila wadsworthia
M351	Desulfovibrio sp. M351	0.00153268	0.000367623	0.000178066	0.00739056	4.16917	CN	Desulfobacterota	Desulfovibrionaceae	Desulfovibrio	Desulfovibrio sp.
M360	D5 sp. M360	0.000113824	4.12097e-05	0.0365553	0.102819	2.76206	CN	Firmicutes	Ruminococcaceae	D5	D5 sp.
M367	Prevotella bivia M367	0.000166852	4.55133e-05	0.0027199	0.02616	3.66601	CN	Bacteroidetes	Bacteroidaceae	Prevotella	Prevotella bivia
M368	RC9 sp. M368	0.00311489	0.000381605	0.00554195	0.0340125	8.1626	CN	Bacteroidetes	UBA932	RC9	RC9 sp.
M373	Alistipes shahii M373	0.00198007	0.00126053	0.0132218	0.0519195	1.57082	CN	Bacteroidetes	Rikenellaceae	Alistipes	Alistipes shahii
M376	Alistipes obesi M376	0.000674867	0.000362282	0.00591459	0.0350238	1.86282	CN	Bacteroidetes	Rikenellaceae	Alistipes	Alistipes obesi
M377	Paraprevotella clara M377	0.00137112	0.000359519	0.00358918	0.0275922	3.81377	CN	Bacteroidetes	Bacteroidaceae	Paraprevotella	Paraprevotella clara
M380	Parabacteroides goldsteinii M380	0.00105843	0.000165237	0.000736579	0.0165877	6.40557	CN	Bacteroidetes	Tannerellaceae	Parabacteroides	Parabacteroides goldsteinii
M381	Parabacteroides merdae M381	0.0026884	0.00143711	0.0140218	0.0540306	1.87071	CN	Bacteroidetes	Tannerellaceae	Parabacteroides	Parabacteroides merdae
M386	Barnesiella intestinihominis M386	0.00057625	0.000107415	0.00276609	0.0262539	5.36469	CN	Bacteroidetes	Barnesiellaceae	Barnesiella	Barnesiella intestinihominis
M389	Phocaeicola plebeius M389	0.00482928	0.00205498	0.00839054	0.0407545	2.35003	CN	Bacteroidetes	Bacteroidaceae	Phocaeicola	Phocaeicola plebeius
M390	Phocaeicola barnesiae M390	0.000170675	2.35642e-05	0.000479394	0.0130693	7.24299	CN	Bacteroidetes	Bacteroidaceae	Phocaeicola	Phocaeicola barnesiae
M394	Bacteroides thetaiotaomicron M394	0.00398848	0.00249382	0.00136423	0.0215668	1.59935	CN	Bacteroidetes	Bacteroidaceae	Bacteroides	Bacteroides thetaiotaomicron
M396	Bacteroides caccae M396	0.00487799	0.00254317	0.0100949	0.0441973	1.91807	CN	Bacteroidetes	Bacteroidaceae	Bacteroides	Bacteroides caccae
M397	Bacteroides ovatus M397	0.0136376	0.00514537	0.00358918	0.0275922	2.65047	CN	Bacteroidetes	Bacteroidaceae	Bacteroides	Bacteroides ovatus
M398	Bacteroides sp. M398	0.00609174	0.0019919	0.00439691	0.030386	3.05826	CN	Bacteroidetes	Bacteroidaceae	Bacteroides	Bacteroides sp.
M399	Phocaeicola dorei M399	0.010883	0.00402664	0.00190219	0.0239531	2.70275	CN	Bacteroidetes	Bacteroidaceae	Phocaeicola	Phocaeicola dorei
M400	Phocaeicola vulgatus M400	0.0217065	0.00596893	0.00117302	0.0203957	3.63659	CN	Bacteroidetes	Bacteroidaceae	Phocaeicola	Phocaeicola vulgatus
M403	Bacteroides uniformis M403	0.0214019	0.00562712	3.81751e-05	0.00259645	3.80335	CN	Bacteroidetes	Bacteroidaceae	Bacteroides	Bacteroides uniformis
M404	Bacteroides stercoris M404	0.00402644	0.00118844	0.00358918	0.0275922	3.388	CN	Bacteroidetes	Bacteroidaceae	Bacteroides	Bacteroides stercoris
M405	Bacteroides ndongoniae M405	0.000230257	6.68072e-05	0.000211702	0.00807927	3.4466	CN	Bacteroidetes	Bacteroidaceae	Bacteroides	Bacteroides ndongoniae
M024	Fusobacterium ulcerans M024	3.34046e-05	0.000132061	0.0203239	0.0696586	3.9534	PE	Firmicutes	Fusobacteriaceae	Fusobacterium	Fusobacterium ulcerans
M045	Fusicatenibacter saccharivorans M045	0.00780357	0.0243858	0.0414795	0.111905	3.12495	PE	Firmicutes	Lachnospiraceae	Fusicatenibacter	Fusicatenibacter saccharivorans
M046	UBA7160 sp. M046	0.000378882	0.00107353	0.0097913	0.0436346	2.83341	PE	Firmicutes	Lachnospiraceae	UBA7160	UBA7160 sp.
M059	Faecalimonas nexilis M059	0.00157609	0.00238513	0.0136167	0.0529715	1.51332	PE	Firmicutes	Lachnospiraceae	Faecalimonas	Faecalimonas nexilis
M067	Eubacterium ramulus M067	0.00193237	0.0024161	0.0107271	0.0453078	1.25033	PE	Firmicutes	Lachnospiraceae	Eubacterium	Eubacterium ramulus
M070	Dorea formicigenerans M070	0.00206423	0.00329966	0.0162088	0.0594183	1.5985	PE	Firmicutes	Lachnospiraceae	Dorea	Dorea formicigenerans
M071	Bariatricus comes M071	0.00315213	0.00524407	0.0100949	0.0441973	1.66366	PE	Firmicutes	Lachnospiraceae	Bariatricus	Bariatricus comes
M074	Ruminococcus gnavus M074	0.00473164	0.0203296	0.0208968	0.071012	4.29652	PE	Firmicutes	Lachnospiraceae	Ruminococcus	Ruminococcus gnavus
M081	Blautia sp. M081	0.00192874	0.00440146	0.0157491	0.0583299	2.28204	PE	Firmicutes	Lachnospiraceae	Blautia	Blautia sp.
M083	Blautia sp. M083	0.00358108	0.00697139	0.00371378	0.0277517	1.94673	PE	Firmicutes	Lachnospiraceae	Blautia	Blautia sp.
M085	Blautia sp. M085	0.000217609	0.000847106	0.0065154	0.0365127	3.89279	PE	Firmicutes	Lachnospiraceae	Blautia	Blautia sp.
M086	Blautia sp. M086	0.0165092	0.0358763	0.0260005	0.0821246	2.17311	PE	Firmicutes	Lachnospiraceae	Blautia	Blautia sp.
M087	Blautia sp. M087	0.0368907	0.0707868	0.0171631	0.0617517	1.91882	PE	Firmicutes	Lachnospiraceae	Blautia	Blautia sp.
M090	Blautia sp. M090	0.0013197	0.00401516	0.0026258	0.0259606	3.04249	PE	Firmicutes	Lachnospiraceae	Blautia	Blautia sp.
M093	Ruminococcus sp. M093	0.000267256	0.000631083	0.0365553	0.102819	2.36134	PE	Firmicutes	Lachnospiraceae	Ruminococcus	Ruminococcus sp.
M094	Ruminococcus sp. M094	0.00130739	0.00167324	0.00028631	0.00927111	1.27983	PE	Firmicutes	Lachnospiraceae	Ruminococcus	Ruminococcus sp.
M095	Ruminococcus sp. M095	0.00150665	0.00209964	0.00158341	0.0226724	1.39358	PE	Firmicutes	Lachnospiraceae	Ruminococcus	Ruminococcus sp.
M101	Blautia sp. M101	0.000570511	0.00134269	0.00470025	0.0314329	2.35348	PE	Firmicutes	Lachnospiraceae	Blautia	Blautia sp.
M140	Ruminococcus sp. M140	0.000647597	0.00207946	0.0394471	0.107945	3.21104	PE	Firmicutes	Acutalibacteraceae	Ruminococcus	Ruminococcus sp.
M206	CAG-180 sp. M206	0.00109504	0.00168512	0.00291728	0.0265449	1.53886	PE	Firmicutes	Acutalibacteraceae	CAG-180	CAG-180 sp.
M213	Pauljensenia sp. M213	0.000755996	0.0027255	0.00591459	0.0350238	3.60518	PE	Actinobacteria	Actinomycetaceae	Pauljensenia	Pauljensenia sp.
M214	Pauljensenia bouchesdurhonensis M214	0.000307581	0.000761312	0.00519036	0.0329884	2.47516	PE	Actinobacteria	Actinomycetaceae	Pauljensenia	Pauljensenia bouchesdurhonensis
M215	Pauljensenia sp. M215	0.000819195	0.001294	0.0321326	0.0944016	1.5796	PE	Actinobacteria	Actinomycetaceae	Pauljensenia	Pauljensenia sp.
M216	Pauljensenia sp. M216	0.000433215	0.000745597	0.0338441	0.0977463	1.72108	PE	Actinobacteria	Actinomycetaceae	Pauljensenia	Pauljensenia sp.
M217	Pauljensenia sp. M217	0.000977068	0.00209541	0.035632	0.101121	2.14459	PE	Actinobacteria	Actinomycetaceae	Pauljensenia	Pauljensenia sp.
M220	Olsenella sp. M220	3.14734e-05	0.000252539	1.53857e-05	0.00259645	8.02387	PE	Actinobacteria	Atopobiaceae	Olsenella	Olsenella sp.
M226	Collinsella sp. M226	0.00187013	0.00614661	0.0274313	0.0849642	3.28674	PE	Actinobacteria	Coriobacteriaceae	Collinsella	Collinsella sp.
M227	Collinsella aerofaciens M227	0.00162004	0.00788957	0.00672738	0.0370006	4.86998	PE	Actinobacteria	Coriobacteriaceae	Collinsella	Collinsella aerofaciens
M253	Senegalimassilia anaerobia M253	8.36262e-05	0.00123225	0.0492952	0.126145	14.7352	PE	Actinobacteria	Eggerthellaceae	Senegalimassilia	Senegalimassilia anaerobia
M254	UMGS1773 sp. M254	7.04654e-05	0.000336506	0.0220842	0.0737455	4.77547	PE	Actinobacteria	Eggerthellaceae	UMGS1773	UMGS1773 sp.
M276	CAG-45 sp. M276	6.96494e-05	0.000323553	0.0153008	0.0572465	4.64545	PE	Firmicutes	Lachnospiraceae	CAG-45	CAG-45 sp.
M319	Evtepia sp. M319	0.000226472	0.00127282	0.0233292	0.0765113	5.6202	PE	Firmicutes	Oscillospiraceae	Evtepia	Evtepia sp.
M369	RC9 sp. M369	0.000218832	0.000693513	0.00100656	0.0191675	3.16916	PE	Bacteroidetes	UBA932	RC9	RC9 sp.
M378	Paraprevotella xylaniphila M378	0.000230437	0.000364461	0.00630937	0.0360204	1.58161	PE	Bacteroidetes	Bacteroidaceae	Paraprevotella	Paraprevotella xylaniphila
M384	CAG-279 sp. M384	1.92848e-05	0.000104332	0.0015258	0.0224025	5.41005	PE	Bacteroidetes	Muribaculaceae	CAG-279	CAG-279 sp.
M385	CAG-1031 sp. M385	0.000425694	0.000757457	0.0026258	0.0259606	1.77935	PE	Bacteroidetes	Muribaculaceae	CAG-1031	CAG-1031 sp.
M391	Phocaeicola coprophilus M391	0.000227041	0.000715909	0.00219792	0.024893	3.15321	PE	Bacteroidetes	Bacteroidaceae	Phocaeicola	Phocaeicola coprophilus
M395	Bacteroides faecis M395	0.000442954	0.000664892	0.0289287	0.0878203	1.50104	PE	Bacteroidetes	Bacteroidaceae	Bacteroides	Bacteroides faecis
M401	Phocaeicola sartorii M401	0.00129775	0.00160977	0.00291728	0.0265449	1.24043	PE	Bacteroidetes	Bacteroidaceae	Phocaeicola	Phocaeicola sartorii
