# Supplementary material for: Deep metagenomic characterization of gut microbial community and function in preeclampsia
Source: Front Cell Infect Microbiol. 2022 Sep 14;12:933523. doi: 10.3389/fcimb.2022.933523 (PMC9515455; doi:10.3389/fcimb.2022.933523)
Supplement: Supplementary file 5 [file Table_5.xlsx]

## Sheet: ST5
Table S5| Detailed information of 618 PE-associated KEGG orthologs.
KO ID	Enriched in	P-value	q	Fold change	Pathway level B	Description
K00318	CN	0.00425191	0.0427929	3.74038	Amino acid metabolism	PRODH, fadM, putB; proline dehydrogenase [EC:1.5.5.2]
K01968	CN	7.72427e-06	0.0112549	3.73195	Amino acid metabolism	E6.4.1.4A; 3-methylcrotonyl-CoA carboxylase alpha subunit [EC:6.4.1.4]
K00819	CN	9.00824e-05	0.0130132	3.46167	Amino acid metabolism	rocD, OAT; ornithine--oxo-acid transaminase [EC:2.6.1.13]
K15789	CN	8.20832e-05	0.0127977	2.52458	Amino acid metabolism	TDH; threonine 3-dehydrogenase [EC:1.1.1.103]
K16165	CN	6.80312e-05	0.012323	2.26758	Amino acid metabolism	nagK; fumarylpyruvate hydrolase [EC:3.7.1.20]
K00603	CN	0.00411121	0.0418651	2.01384	Amino acid metabolism	fctD; glutamate formiminotransferase / 5-formyltetrahydrofolate cyclo-ligase [EC:2.1.2.5 6.3.3.2]
K01798	CN	0.000828893	0.0219468	1.99979	Amino acid metabolism	alr-murF; Alr-MurF fusion protein [EC:5.1.1.1 6.3.2.10]
K01843	CN	0.00346835	0.0379822	1.89114	Amino acid metabolism	kamA; lysine 2,3-aminomutase [EC:5.4.3.2]
K12524	CN	0.00117302	0.0239861	1.83171	Amino acid metabolism	thrA; bifunctional aspartokinase / homoserine dehydrogenase 1 [EC:2.7.2.4 1.1.1.3]
K01438	CN	0.000311714	0.0172644	1.82752	Amino acid metabolism	argE; acetylornithine deacetylase [EC:3.5.1.16]
K01425	CN	0.000274339	0.0169474	1.82173	Amino acid metabolism	glsA, GLS; glutaminase [EC:3.5.1.2]
K00639	CN	0.00164298	0.0264005	1.80725	Amino acid metabolism	kbl, GCAT; glycine C-acetyltransferase [EC:2.3.1.29]
K01712	CN	0.0027199	0.0334897	1.71202	Amino acid metabolism	hutU, UROC1; urocanate hydratase [EC:4.2.1.49]
K01468	CN	0.0026258	0.0329027	1.7094	Amino acid metabolism	hutI, AMDHD1; imidazolonepropionase [EC:3.5.2.7]
K01089	CN	0.00183412	0.0275243	1.70368	Amino acid metabolism	hisB; imidazoleglycerol-phosphate dehydratase / histidinol-phosphatase [EC:4.2.1.19 3.1.3.15]
K01745	CN	0.00244636	0.0317238	1.5812	Amino acid metabolism	hutH, HAL; histidine ammonia-lyase [EC:4.3.1.3]
K00772	CN	0.00312746	0.0358132	1.5739	Amino acid metabolism	mtaP, MTAP; 5'-methylthioadenosine phosphorylase [EC:2.4.2.28]
K08968	CN	0.00281703	0.0340746	1.53209	Amino acid metabolism	msrC; L-methionine (R)-S-oxide reductase [EC:1.8.4.14]
K00812	CN	0.00536359	0.0494593	1.3688	Amino acid metabolism	aspB; aspartate aminotransferase [EC:2.6.1.1]
K02614	CN	0.00470025	0.0456101	1.33218	Amino acid metabolism	paaI; acyl-CoA thioesterase [EC:3.1.2.-]
K19200	CN	0.000142153	0.0148348	2.72805	Biosynthesis of other secondary metabolites	IAL; isopenicillin-N N-acyltransferase like protein
K19974	CN	0.00536359	0.0494593	1.74371	Biosynthesis of other secondary metabolites	acbO; 2-epi-5-epi-valiolone 7-phosphate 2-epimerase [EC:5.1.3.35]
K10046	CN	0.000736579	0.0214211	6.40557	Carbohydrate metabolism	GME; GDP-D-mannose 3', 5'-epimerase [EC:5.1.3.18 5.1.3.-]
K05304	CN	0.00358918	0.0387063	3.81377	Carbohydrate metabolism	NANS, SAS; sialic acid synthase [EC:2.5.1.56 2.5.1.57 2.5.1.132]
K15919	CN	0.000298762	0.0171622	3.52098	Carbohydrate metabolism	HPR2_3; glyoxylate/hydroxypyruvate reductase [EC:1.1.1.79 1.1.1.81]
K01965	CN	6.18794e-05	0.0123081	3.32388	Carbohydrate metabolism	PCCA, pccA; propionyl-CoA carboxylase alpha chain [EC:6.4.1.3]
K12453	CN	2.98117e-05	0.0121339	3.30891	Carbohydrate metabolism	rfbS; CDP-paratose synthetase [EC:1.1.1.342]
K15855	CN	8.20832e-05	0.0127977	3.23651	Carbohydrate metabolism	csxA; exo-1,4-beta-D-glucosaminidase [EC:3.2.1.165]
K01654	CN	0.00190219	0.0279423	3.17689	Carbohydrate metabolism	neuB, nnaB; N-acetylneuraminate synthase [EC:2.5.1.56]
K01640	CN	0.00253465	0.0323139	3.05675	Carbohydrate metabolism	E4.1.3.4, HMGCL, hmgL; hydroxymethylglutaryl-CoA lyase [EC:4.1.3.4]
K17818	CN	0.000241145	0.0165975	3.02864	Carbohydrate metabolism	ARD1; D-arabinitol dehydrogenase (NADP+) [EC:1.1.1.287]
K22934	CN	0.000202653	0.0160765	2.99611	Carbohydrate metabolism	E3.2.1.28; alpha,alpha-trehalase [EC:3.2.1.28]
K03103	CN	0.000162543	0.0153324	2.96504	Carbohydrate metabolism	MINPP1; multiple inositol-polyphosphate phosphatase / 2,3-bisphosphoglycerate 3-phosphatase [EC:3.1.3.62 3.1.3.80]
K19668	CN	0.00017761	0.0156427	2.95739	Carbohydrate metabolism	CBH2, cbhA; cellulose 1,4-beta-cellobiosidase [EC:3.2.1.91]
K01236	CN	6.48873e-05	0.0123157	2.78942	Carbohydrate metabolism	treZ, glgZ; maltooligosyltrehalose trehalohydrolase [EC:3.2.1.141]
K01729	CN	0.00291728	0.0346571	2.76175	Carbohydrate metabolism	algL; poly(beta-D-mannuronate) lyase [EC:4.2.2.3]
K01432	CN	0.00017761	0.0156427	2.66036	Carbohydrate metabolism	AFMID; arylformamidase [EC:3.5.1.9]
K00696	CN	0.00358918	0.0387063	2.65047	Carbohydrate metabolism	E2.4.1.14; sucrose-phosphate synthase [EC:2.4.1.14]
K23003	CN	0.000828893	0.0219468	2.53871	Carbohydrate metabolism	lgaA; L-galactose dehydrogenase [EC:1.1.1.-]
K15912	CN	0.00411121	0.0418651	2.53454	Carbohydrate metabolism	pglF; UDP-N-acetylglucosamine 4,6-dehydratase [EC:4.2.1.135]
K23004	CN	0.00141627	0.025121	2.45389	Carbohydrate metabolism	lgaB; L-galactono-1,5-lactonase [EC:3.1.1.-]
K00066	CN	0.00147011	0.0254437	2.43416	Carbohydrate metabolism	algD; GDP-mannose 6-dehydrogenase [EC:1.1.1.132]
K07102	CN	0.00244636	0.0317238	2.41973	Carbohydrate metabolism	amgK; N-acetylmuramate 1-kinase [EC:2.7.1.221]
K22214	CN	0.000298762	0.0171622	2.40114	Carbohydrate metabolism	scpC; propionyl-CoA:succinyl-CoA transferase [EC:2.8.3.-]
K19517	CN	0.0026258	0.0329027	2.36288	Carbohydrate metabolism	MIK; 1D-myo-inositol 3-kinase [EC:2.7.1.64]
K21574	CN	0.000492694	0.0193602	2.34294	Carbohydrate metabolism	susB; glucan 1,4-alpha-glucosidase [EC:3.2.1.3]
K01847	CN	0.000155463	0.0151708	2.32977	Carbohydrate metabolism	MUT; methylmalonyl-CoA mutase [EC:5.4.99.2]
K01787	CN	0.000325181	0.0173631	2.27652	Carbohydrate metabolism	RENBP; N-acylglucosamine 2-epimerase [EC:5.1.3.8]
K07405	CN	0.00176828	0.0271024	2.21952	Carbohydrate metabolism	E3.2.1.1A; alpha-amylase [EC:3.2.1.1]
K02473	CN	0.0015258	0.0257613	2.19267	Carbohydrate metabolism	wbpP; UDP-N-acetylglucosamine/UDP-N-acetylgalactosamine 4-epimerase [EC:5.1.3.7 5.1.3.-]
K09011	CN	0.000368875	0.0176397	2.19158	Carbohydrate metabolism	cimA; (R)-citramalate synthase [EC:2.3.1.182]
K18676	CN	4.86958e-05	0.0122638	2.17705	Carbohydrate metabolism	gspK; glucosamine kinase [EC:2.7.1.8]
K18335	CN	0.00043557	0.0186495	2.17345	Carbohydrate metabolism	K18335; 2-keto-3-deoxy-L-fuconate dehydrogenase [EC:1.1.1.-]
K18930	CN	0.0027199	0.0334897	2.14326	Carbohydrate metabolism	dld; D-lactate dehydrogenase
K16055	CN	0.00190219	0.0279423	2.09862	Carbohydrate metabolism	TPS; trehalose 6-phosphate synthase/phosphatase [EC:2.4.1.15 3.1.3.12]
K16153	CN	0.000653775	0.0208532	2.09792	Carbohydrate metabolism	K16153; glycogen phosphorylase/synthase [EC:2.4.1.1 2.4.1.11]
K01960	CN	0.00244636	0.0317238	2.05048	Carbohydrate metabolism	pycB; pyruvate carboxylase subunit B [EC:6.4.1.1]
K00992	CN	0.00384225	0.0402397	2.04819	Carbohydrate metabolism	murU; N-acetyl-alpha-D-muramate 1-phosphate uridylyltransferase [EC:2.7.7.99]
K01573	CN	0.00104602	0.0232438	2.01164	Carbohydrate metabolism	oadG; oxaloacetate decarboxylase (Na+ extruding) subunit gamma
K18118	CN	0.00176828	0.0271024	1.99632	Carbohydrate metabolism	aarC, cat1; succinyl-CoA:acetate CoA-transferase [EC:2.8.3.18]
K00281	CN	0.00136423	0.0249043	1.98041	Carbohydrate metabolism	GLDC, gcvP; glycine dehydrogenase [EC:1.4.4.2]
K01053	CN	0.000241145	0.0165975	1.95966	Carbohydrate metabolism	gnl, RGN; gluconolactonase [EC:3.1.1.17]
K05305	CN	0.00164298	0.0264005	1.93032	Carbohydrate metabolism	FUK; fucokinase [EC:2.7.1.52]
K12373	CN	0.000353743	0.0175507	1.90024	Carbohydrate metabolism	HEXA_B; hexosaminidase [EC:3.2.1.52]
K01730	CN	0.00335118	0.0372584	1.89874	Carbohydrate metabolism	ogl; oligogalacturonide lyase [EC:4.2.2.6]
K00029	CN	0.000579594	0.0202421	1.84106	Carbohydrate metabolism	E1.1.1.40, maeB; malate dehydrogenase (oxaloacetate-decarboxylating)(NADP+) [EC:1.1.1.40]
K05606	CN	0.000339185	0.0174585	1.82395	Carbohydrate metabolism	MCEE, epi; methylmalonyl-CoA/ethylmalonyl-CoA epimerase [EC:5.1.99.1]
K01849	CN	0.000680376	0.0210472	1.81588	Carbohydrate metabolism	E5.4.99.2B, mcmA2; methylmalonyl-CoA mutase, C-terminal domain [EC:5.4.99.2]
K01711	CN	0.000241145	0.0165975	1.81078	Carbohydrate metabolism	gmd, GMDS; GDPmannose 4,6-dehydratase [EC:4.2.1.47]
K02377	CN	0.000353743	0.0175507	1.80481	Carbohydrate metabolism	TSTA3, fcl; GDP-L-fucose synthase [EC:1.1.1.271]
K00024	CN	0.000124161	0.0142988	1.78454	Carbohydrate metabolism	mdh; malate dehydrogenase [EC:1.1.1.37]
K01007	CN	0.000368875	0.0176397	1.75939	Carbohydrate metabolism	pps, ppsA; pyruvate, water dikinase [EC:2.7.9.2]
K22994	CN	0.00371378	0.0394302	1.73925	Carbohydrate metabolism	pelX; pectate disaccharide-lyase [EC:4.2.2.9]
K01848	CN	0.00108688	0.0234963	1.72991	Carbohydrate metabolism	E5.4.99.2A, mcmA1; methylmalonyl-CoA mutase, N-terminal domain [EC:5.4.99.2]
K18429	CN	0.00170459	0.0267433	1.72783	Carbohydrate metabolism	legG, neuC2; GDP/UDP-N,N'-diacetylbacillosamine 2-epimerase (hydrolysing) [EC:3.2.1.184]
K01676	CN	0.00183412	0.0275243	1.71873	Carbohydrate metabolism	E4.2.1.2A, fumA, fumB; fumarate hydratase, class I [EC:4.2.1.2]
K01580	CN	0.0026258	0.0329027	1.71278	Carbohydrate metabolism	E4.1.1.15, gadB, gadA, GAD; glutamate decarboxylase [EC:4.1.1.15]
K00844	CN	0.000653775	0.0208532	1.70381	Carbohydrate metabolism	HK; hexokinase [EC:2.7.1.1]
K00175	CN	0.00439691	0.0437267	1.68641	Carbohydrate metabolism	korB, oorB, oforB; 2-oxoglutarate/2-oxoacid ferredoxin oxidoreductase subunit beta [EC:1.2.7.3 1.2.7.11]
K00174	CN	0.00384225	0.0402397	1.68565	Carbohydrate metabolism	korA, oorA, oforA; 2-oxoglutarate/2-oxoacid ferredoxin oxidoreductase subunit alpha [EC:1.2.7.3 1.2.7.11]
K19355	CN	0.00536359	0.0494593	1.67239	Carbohydrate metabolism	MAN; mannan endo-1,4-beta-mannosidase [EC:3.2.1.78]
K01433	CN	0.00519036	0.0484915	1.60861	Carbohydrate metabolism	purU; formyltetrahydrofolate deformylase [EC:3.5.1.10]
K02775	CN	0.000861944	0.0221128	1.60069	Carbohydrate metabolism	gatC, sgcC; galactitol PTS system EIIC component
K00971	CN	0.00253465	0.0323139	1.56985	Carbohydrate metabolism	manC, cpsB; mannose-1-phosphate guanylyltransferase [EC:2.7.7.13]
K00241	CN	0.00170459	0.0267433	1.56885	Carbohydrate metabolism	sdhC, frdC; succinate dehydrogenase / fumarate reductase, cytochrome b subunit
K01895	CN	0.00291728	0.0346571	1.47353	Carbohydrate metabolism	ACSS1_2, acs; acetyl-CoA synthetase [EC:6.2.1.1]
K01840	CN	0.00346835	0.0379822	1.43185	Carbohydrate metabolism	manB; phosphomannomutase [EC:5.4.2.8]
K07106	CN	0.0027199	0.0334897	1.37144	Carbohydrate metabolism	murQ; N-acetylmuramic acid 6-phosphate etherase [EC:4.2.1.126]
K17724	CN	0.00358918	0.0387063	1.3332	Carbohydrate metabolism	IRG1; aconitate decarboxylase [EC:4.1.1.6]
K01207	CN	0.000339185	0.0174585	1.32132	Carbohydrate metabolism	nagZ; beta-N-acetylhexosaminidase [EC:3.2.1.52]
K00012	CN	0.000298762	0.0171622	1.29476	Carbohydrate metabolism	UGDH, ugd; UDPglucose 6-dehydrogenase [EC:1.1.1.22]
K00382	CN	0.00536359	0.0494593	1.29235	Carbohydrate metabolism	DLD, lpd, pdhD; dihydrolipoamide dehydrogenase [EC:1.8.1.4]
K02564	CN	0.00253465	0.0323139	1.20757	Carbohydrate metabolism	nagB, GNPDA; glucosamine-6-phosphate deaminase [EC:3.5.99.6]
K01173	CN	0.00100656	0.0230276	1.94301	Cell growth and death	ENDOG; endonuclease G, mitochondrial
K03590	CN	0.000861944	0.0221128	1.63058	Cell growth and death	ftsA; cell division protein FtsA
K20527	CN	0.00439691	0.0437267	3.89742	Cellular community - prokaryotes	trbB; type IV secretion system protein TrbB [EC:7.4.2.8]
K20530	CN	0.00502215	0.0475271	3.7329	Cellular community - prokaryotes	trbE; type IV secretion system protein TrbE [EC:7.4.2.8]
K20531	CN	0.00502215	0.0475271	3.7329	Cellular community - prokaryotes	trbF; type IV secretion system protein TrbF
K20532	CN	0.00502215	0.0475271	3.7329	Cellular community - prokaryotes	trbG; type IV secretion system protein TrbG
K20533	CN	0.00502215	0.0475271	3.7329	Cellular community - prokaryotes	trbI; type IV secretion system protein TrbI
K20948	CN	0.00117302	0.0239861	3.63659	Cellular community - prokaryotes	vpsJ; polysaccharide biosynthesis protein VpsJ
K18139	CN	0.000339185	0.0174585	2.14104	Cellular community - prokaryotes	oprM, emhC, ttgC, cusC, adeK, smeF, mtrE, cmeC, gesC; outer membrane protein, multidrug efflux system
K06204	CN	0.000124161	0.0142988	1.92598	Cellular community - prokaryotes	dksA; DnaK suppressor protein
K21001	CN	0.00190219	0.0279423	1.70838	Cellular community - prokaryotes	pslH; polysaccharide biosynthesis protein PslH
K11936	CN	0.00281703	0.0340746	1.66329	Cellular community - prokaryotes	pgaC, icaA; poly-beta-1,6-N-acetyl-D-glucosamine synthase [EC:2.4.1.-]
K01278	CN	9.43489e-05	0.0131156	1.96433	Digestive system	DPP4, CD26; dipeptidyl-peptidase 4 [EC:3.4.14.5]
K03585	CN	4.00918e-05	0.0122195	2.1172	Drug resistance: antimicrobial	acrA, mexA, adeI, smeD, mtrC, cmeA; membrane fusion protein, multidrug efflux system
K08218	CN	0.000221125	0.016345	2.01686	Drug resistance: antimicrobial	ampG; MFS transporter, PAT family, beta-lactamase induction signal transducer AmpG
K06079	CN	0.0015258	0.0257613	1.83354	Drug resistance: antimicrobial	cutF, nlpE; copper homeostasis protein (lipoprotein)
K18138	CN	0.000736579	0.0214211	1.7878	Drug resistance: antimicrobial	acrB, mexB, adeJ, smeE, mtrD, cmeB; multidrug efflux pump
K00531	CN	0.00359753	0.0387555	183.376	Energy metabolism	anfG; nitrogenase delta subunit [EC:1.18.6.1]
K20035	CN	0.000707966	0.0212366	2.07709	Energy metabolism	dmdC; 3-(methylthio)propanoyl-CoA dehydrogenase [EC:1.3.8.-]
K00380	CN	0.000766247	0.021601	1.99991	Energy metabolism	cysJ; sulfite reductase (NADPH) flavoprotein alpha-component [EC:1.8.1.2]
K05576	CN	0.00183412	0.0275243	1.80358	Energy metabolism	ndhE; NAD(P)H-quinone oxidoreductase subunit 4L [EC:7.1.1.2]
K00339	CN	0.000828893	0.0219468	1.77922	Energy metabolism	nuoJ; NADH-quinone oxidoreductase subunit J [EC:7.1.1.2]
K00338	CN	0.00136423	0.0249043	1.72858	Energy metabolism	nuoI; NADH-quinone oxidoreductase subunit I [EC:7.1.1.2]
K01082	CN	0.00147011	0.0254437	1.71155	Energy metabolism	cysQ, MET22, BPNT1; 3'(2'), 5'-bisphosphate nucleotidase [EC:3.1.3.7]
K00342	CN	0.00141627	0.025121	1.70691	Energy metabolism	nuoM; NADH-quinone oxidoreductase subunit M [EC:7.1.1.2]
K00341	CN	0.00136423	0.0249043	1.6991	Energy metabolism	nuoL; NADH-quinone oxidoreductase subunit L [EC:7.1.1.2]
K00337	CN	0.00170459	0.0267433	1.6965	Energy metabolism	nuoH; NADH-quinone oxidoreductase subunit H [EC:7.1.1.2]
K13378	CN	0.0027199	0.0334897	1.69169	Energy metabolism	nuoCD; NADH-quinone oxidoreductase subunit C/D [EC:7.1.1.2]
K00340	CN	0.00485882	0.0465664	1.69144	Energy metabolism	nuoK; NADH-quinone oxidoreductase subunit K [EC:7.1.1.2]
K00343	CN	0.00197253	0.0283561	1.68716	Energy metabolism	nuoN; NADH-quinone oxidoreductase subunit N [EC:7.1.1.2]
K15876	CN	0.00411121	0.0418651	1.68645	Energy metabolism	nrfH; cytochrome c nitrite reductase small subunit
K03885	CN	0.00519036	0.0484915	1.67551	Energy metabolism	ndh; NADH:ubiquinone reductase (H+-translocating) [EC:7.1.1.2]
K00331	CN	0.00212033	0.0293569	1.67088	Energy metabolism	nuoB; NADH-quinone oxidoreductase subunit B [EC:7.1.1.2]
K00330	CN	0.00219792	0.0299488	1.66448	Energy metabolism	nuoA; NADH-quinone oxidoreductase subunit A [EC:7.1.1.2]
K00425	CN	0.00358918	0.0387063	1.42666	Energy metabolism	cydA; cytochrome bd ubiquinol oxidase subunit I [EC:7.1.1.7]
K00426	CN	0.00335118	0.0372584	1.41707	Energy metabolism	cydB; cytochrome bd ubiquinol oxidase subunit II [EC:7.1.1.7]
K01673	CN	0.00219792	0.0299488	1.32039	Energy metabolism	cynT, can; carbonic anhydrase [EC:4.2.1.1]
K12613	CN	0.000100296	0.0133892	4.7036	Folding, sorting and degradation	DCP2; mRNA-decapping enzyme subunit 2 [EC:3.6.1.62]
K12604	CN	0.00454632	0.0446659	2.33603	Folding, sorting and degradation	CNOT1, NOT1; CCR4-NOT transcription complex subunit 1
K21379	CN	0.0027199	0.0334897	3.66601	Glycan biosynthesis and metabolism	vioB; dTDP-4-amino-4,6-dideoxy-D-glucose acyltransferase [EC:2.3.1.209]
K19872	CN	0.00358918	0.0387063	3.388	Glycan biosynthesis and metabolism	FKTN; fukutin [EC:2.7.8.-]
K24301	CN	0.00126534	0.0244554	2.89354	Glycan biosynthesis and metabolism	lea1; UDP-N-acetylglucosamine 4,6-dehydratase [EC:4.2.1.135]
K20883	CN	0.00253465	0.0323139	2.89101	Glycan biosynthesis and metabolism	wbgN; O55-antigen biosynthesis alpha-1,2-colitosyltransferase [EC:2.4.1.341]
K12983	CN	7.83366e-05	0.0126845	2.86533	Glycan biosynthesis and metabolism	waaV; UDP-glucose:(glucosyl)LPS beta-1,3-glucosyltransferase [EC:2.4.1.-]
K01205	CN	0.00100656	0.0230276	2.43941	Glycan biosynthesis and metabolism	NAGLU; alpha-N-acetylglucosaminidase [EC:3.2.1.50]
K09949	CN	0.00302073	0.0352367	2.36194	Glycan biosynthesis and metabolism	lpxI; UDP-2,3-diacylglucosamine hydrolase [EC:3.6.1.54]
K10532	CN	0.000968461	0.0228064	2.30931	Glycan biosynthesis and metabolism	HGSNAT; heparan-alpha-glucosaminide N-acetyltransferase [EC:2.3.1.78]
K01136	CN	0.00158341	0.026074	2.23644	Glycan biosynthesis and metabolism	IDS; iduronate 2-sulfatase [EC:3.1.6.13]
K01197	CN	0.000513217	0.0195878	2.05538	Glycan biosynthesis and metabolism	hya; hyaluronoglucosaminidase [EC:3.2.1.35]
K00677	CN	0.000211702	0.0162128	1.99274	Glycan biosynthesis and metabolism	lpxA; UDP-N-acetylglucosamine acyltransferase [EC:2.3.1.129]
K00912	CN	0.000193963	0.0159361	1.95643	Glycan biosynthesis and metabolism	lpxK; tetraacyldisaccharide 4'-kinase [EC:2.7.1.130]
K02527	CN	0.000707966	0.0212366	1.93428	Glycan biosynthesis and metabolism	kdtA, waaA; 3-deoxy-D-manno-octulosonic-acid transferase [EC:2.4.99.12 2.4.99.13 2.4.99.14 2.4.99.15]
K02536	CN	0.000211702	0.0162128	1.89769	Glycan biosynthesis and metabolism	lpxD; UDP-3-O-[3-hydroxymyristoyl] glucosamine N-acyltransferase [EC:2.3.1.191]
K01627	CN	0.000135903	0.0146604	1.89228	Glycan biosynthesis and metabolism	kdsA; 2-dehydro-3-deoxyphosphooctonate aldolase (KDO 8-P synthase) [EC:2.5.1.55]
K03760	CN	0.000736579	0.0214211	1.88981	Glycan biosynthesis and metabolism	eptA, pmrC; lipid A ethanolaminephosphotransferase [EC:2.7.8.43]
K20429	CN	0.00397469	0.0410515	1.8842	Glycan biosynthesis and metabolism	vioA; dTDP-4-amino-4,6-dideoxy-D-glucose transaminase [EC:2.6.1.33]
K23102	CN	0.00411121	0.0418651	1.86469	Glycan biosynthesis and metabolism	wekW; O18-antigen biosynthesis alpha-1,3-galactosyltransferase [EC:2.4.1.-]
K00748	CN	0.000534523	0.0198107	1.84223	Glycan biosynthesis and metabolism	lpxB; lipid-A-disaccharide synthase [EC:2.4.1.182]
K03814	CN	0.00104602	0.0232438	1.83177	Glycan biosynthesis and metabolism	mtgA; monofunctional glycosyltransferase [EC:2.4.1.129]
K03273	CN	0.00244636	0.0317238	1.78519	Glycan biosynthesis and metabolism	gmhB; D-glycero-D-manno-heptose 1,7-bisphosphate phosphatase [EC:3.1.3.82 3.1.3.83]
K03269	CN	0.00108688	0.0234963	1.77078	Glycan biosynthesis and metabolism	lpxH; UDP-2,3-diacylglucosamine hydrolase [EC:3.6.1.54]
K02517	CN	0.000707966	0.0212366	1.75071	Glycan biosynthesis and metabolism	lpxL, htrB; Kdo2-lipid IVA lauroyltransferase/acyltransferase [EC:2.3.1.241 2.3.1.-]
K06041	CN	0.000311714	0.0172644	1.71865	Glycan biosynthesis and metabolism	kdsD, kpsF; arabinose-5-phosphate isomerase [EC:5.3.1.13]
K02847	CN	0.00281703	0.0340746	1.68738	Glycan biosynthesis and metabolism	waaL, rfaL; O-antigen ligase [EC:2.4.1.-]
K00979	CN	0.00141627	0.025121	1.63403	Glycan biosynthesis and metabolism	kdsB; 3-deoxy-manno-octulosonate cytidylyltransferase (CMP-KDO synthetase) [EC:2.7.7.38]
K03276	CN	0.000653775	0.0208532	1.60522	Glycan biosynthesis and metabolism	waaR, waaT, rfaJ; UDP-glucose/galactose:(glucosyl)LPS alpha-1,2-glucosyl/galactosyltransferase [EC:2.4.1.-]
K02841	CN	0.00197253	0.0283561	1.55274	Glycan biosynthesis and metabolism	waaC, rfaC; heptosyltransferase I [EC:2.4.-.-]
K21344	CN	0.00158341	0.026074	1.54866	Glycan biosynthesis and metabolism	rfaE1; D-glycero-beta-D-manno-heptose-7-phosphate kinase [EC:2.7.1.167]
K23073	CN	0.00176828	0.0271024	1.38667	Glycan biosynthesis and metabolism	wbbK; O16-antigen biosynthesis glucosyltransferase
K18671	CN	0.000178066	0.0156515	4.16917	Immune system	HDAC10; histone deacetylase 10 [EC:3.5.1.98]
K23475	CN	0.00158341	0.026074	2.04538	Infectious disease: bacterial	yopB, popB, aopB; transloator
K00227	CN	0.0027199	0.0334897	3.66601	Lipid metabolism	SC5DL, ERG3; Delta7-sterol 5-desaturase [EC:1.14.19.20]
K12344	CN	0.00212033	0.0293569	2.64904	Lipid metabolism	SRD5A2; 3-oxo-5-alpha-steroid 4-dehydrogenase 2 [EC:1.3.1.22]
K01134	CN	0.00411121	0.0418651	2.39456	Lipid metabolism	ARSA; arylsulfatase A [EC:3.1.6.8]
K16363	CN	0.000828893	0.0219468	2.33748	Lipid metabolism	lpxC-fabZ; UDP-3-O-[3-hydroxymyristoyl] N-acetylglucosamine deacetylase / 3-hydroxyacyl-[acyl-carrier-protein] dehydratase [EC:3.5.1.108 4.2.1.59]
K01186	CN	0.00197253	0.0283561	2.32561	Lipid metabolism	NEU1; sialidase-1 [EC:3.2.1.18]
K00208	CN	6.18794e-05	0.0123081	2.01596	Lipid metabolism	fabI; enoyl-[acyl-carrier protein] reductase I [EC:1.3.1.9 1.3.1.10]
K17717	CN	0.00371378	0.0394302	1.9705	Lipid metabolism	pld; phospholipase D [EC:3.1.4.4]
K12343	CN	0.00136423	0.0249043	1.92806	Lipid metabolism	SRD5A1; 3-oxo-5-alpha-steroid 4-dehydrogenase 1 [EC:1.3.1.22]
K00647	CN	0.00183412	0.0275243	1.92048	Lipid metabolism	fabB; 3-oxoacyl-[acyl-carrier-protein] synthase I [EC:2.3.1.41]
K18575	CN	0.000896196	0.022349	1.88729	Lipid metabolism	TMEM86B; alkenylglycerophosphocholine hydrolase [EC:3.3.2.2]
K01095	CN	0.00170459	0.0267433	1.71117	Lipid metabolism	pgpA; phosphatidylglycerophosphatase A [EC:3.1.3.27]
K11003	CN	0.00302073	0.0352367	2.09876	Membrane transport	hlyD, cyaD; membrane fusion protein, hemolysin D
K12340	CN	0.000251773	0.0167179	2.07466	Membrane transport	tolC, bepC, cyaE, raxC, sapF, rsaF, hasF; outer membrane protein
K03222	CN	0.00136423	0.0249043	2.07418	Membrane transport	yscJ, sctJ, hrcJ, ssaJ; type III secretion protein J
K03223	CN	0.00136423	0.0249043	2.07418	Membrane transport	yscL, sctL; type III secretion protein L
K03224	CN	0.00136423	0.0249043	2.07418	Membrane transport	yscN, sctN, hrcN, ssaN; ATP synthase in type III secretion protein N [EC:7.4.2.8]
K03225	CN	0.00136423	0.0249043	2.07418	Membrane transport	yscQ, sctQ, hrcQ, ssaQ, spaO; type III secretion protein Q
K03226	CN	0.00136423	0.0249043	2.07418	Membrane transport	yscR, sctR, hrcR, ssaR; type III secretion protein R
K03227	CN	0.00136423	0.0249043	2.07418	Membrane transport	yscS, sctS, hrcS, ssaS; type III secretion protein S
K03228	CN	0.00136423	0.0249043	2.07418	Membrane transport	yscT, sctT, hrcT, ssaT; type III secretion protein T
K03229	CN	0.00136423	0.0249043	2.07418	Membrane transport	yscU, sctU, hrcU, ssaU; type III secretion protein U
K03219	CN	0.00158341	0.026074	2.04538	Membrane transport	yscC, sctC, ssaC; type III secretion protein C
K04056	CN	0.00158341	0.026074	2.04538	Membrane transport	yscO, sctO; type III secretion protein O
K04058	CN	0.00158341	0.026074	2.04538	Membrane transport	yscW, sctW; type III secretion protein W
K04059	CN	0.00158341	0.026074	2.04538	Membrane transport	yscX, sctX; type III secretion protein X
K11085	CN	0.000262832	0.0168345	1.93563	Membrane transport	msbA; ATP-binding cassette, subfamily B, bacterial MsbA [EC:7.5.2.6]
K02002	CN	0.00291728	0.0346571	1.92199	Membrane transport	proX; glycine betaine/proline transport system substrate-binding protein
K02067	CN	0.000298762	0.0171622	1.85175	Membrane transport	mlaD, linM; phospholipid/cholesterol/gamma-HCH transport system substrate-binding protein
K06861	CN	0.000339185	0.0174585	1.8496	Membrane transport	lptB; lipopolysaccharide export system ATP-binding protein [EC:7.5.2.5]
K02065	CN	0.000274339	0.0169474	1.84537	Membrane transport	mlaF, linL, mkl; phospholipid/cholesterol/gamma-HCH transport system ATP-binding protein
K02066	CN	0.000274339	0.0169474	1.84509	Membrane transport	mlaE, linK; phospholipid/cholesterol/gamma-HCH transport system permease protein
K03230	CN	0.00176828	0.0271024	1.84346	Membrane transport	yscV, sctV, hrcV, ssaV, invA; type III secretion protein V
K07091	CN	0.000896196	0.022349	1.8273	Membrane transport	lptF; lipopolysaccharide export system permease protein
K05776	CN	0.00104602	0.0232438	1.8241	Membrane transport	modF; molybdate transport system ATP-binding protein
K11720	CN	0.000492694	0.0193602	1.80502	Membrane transport	lptG; lipopolysaccharide export system permease protein
K09808	CN	0.000861944	0.0221128	1.77278	Membrane transport	lolC_E; lipoprotein-releasing system permease protein
K03221	CN	0.00384225	0.0402397	1.71962	Membrane transport	yscF, sctF, ssaG, prgI; type III secretion protein F
K05369	CN	4.86958e-05	0.0122638	3.21941	Metabolism of cofactors and vitamins	pebA; 15,16-dihydrobiliverdin:ferredoxin oxidoreductase [EC:1.3.7.2]
K03404	CN	7.47499e-05	0.0125677	3.1142	Metabolism of cofactors and vitamins	chlD, bchD; magnesium chelatase subunit D [EC:6.6.1.1]
K15734	CN	0.00197253	0.0283561	2.95891	Metabolism of cofactors and vitamins	SDR16C5; all-trans-retinol dehydrogenase (NAD+) [EC:1.1.1.105]
K21479	CN	0.000339185	0.0174585	2.90047	Metabolism of cofactors and vitamins	cbiH60; cobalt-factor III methyltransferase [EC:2.1.1.272]
K13541	CN	0.000736579	0.0214211	2.77077	Metabolism of cofactors and vitamins	cbiGH-cobJ; cobalt-precorrin 5A hydrolase / cobalt-factor III methyltransferase / precorrin-3B C17-methyltransferase [EC:3.7.1.12 2.1.1.272 2.1.1.131]
K09680	CN	6.18794e-05	0.0123081	2.66495	Metabolism of cofactors and vitamins	PANK1_2_3, CAB1, coaW; type II pantothenate kinase [EC:2.7.1.33]
K11153	CN	0.000453896	0.018891	2.55281	Metabolism of cofactors and vitamins	RDH12; retinol dehydrogenase 12 [EC:1.1.1.300]
K14379	CN	0.000579594	0.0202421	2.44645	Metabolism of cofactors and vitamins	ACP5; tartrate-resistant acid phosphatase type 5 [EC:3.1.3.2]
K09789	CN	0.000556639	0.0200288	2.35279	Metabolism of cofactors and vitamins	bioG; pimeloyl-[acyl-carrier protein] methyl ester esterase [EC:3.1.1.85]
K21063	CN	0.00204522	0.0287655	2.19035	Metabolism of cofactors and vitamins	K21063; 5-amino-6-(5-phospho-D-ribitylamino)uracil phosphatase [EC:3.1.3.104]
K00652	CN	0.000155463	0.0151708	1.90737	Metabolism of cofactors and vitamins	bioF; 8-amino-7-oxononanoate synthase [EC:2.3.1.47]
K09474	CN	0.00147011	0.0254437	1.87388	Metabolism of cofactors and vitamins	phoN; acid phosphatase (class A) [EC:3.1.3.2]
K00950	CN	0.000108304	0.0137251	1.84661	Metabolism of cofactors and vitamins	folK; 2-amino-4-hydroxy-6-hydroxymethyldihydropteridine diphosphokinase [EC:2.7.6.3]
K03474	CN	0.000766247	0.021601	1.84066	Metabolism of cofactors and vitamins	pdxJ; pyridoxine 5-phosphate synthase [EC:2.6.99.2]
K02230	CN	0.00439691	0.0437267	1.83107	Metabolism of cofactors and vitamins	cobN; cobaltochelatase CobN [EC:6.6.1.2]
K00097	CN	0.00302073	0.0352367	1.77479	Metabolism of cofactors and vitamins	pdxA; 4-hydroxythreonine-4-phosphate dehydrogenase [EC:1.1.1.262]
K02169	CN	0.000534523	0.0198107	1.77285	Metabolism of cofactors and vitamins	bioC; malonyl-CoA O-methyltransferase [EC:2.1.1.197]
K03644	CN	0.000556639	0.0200288	1.75027	Metabolism of cofactors and vitamins	lipA, LIAS, LIP1, LIP5; lipoyl synthase [EC:2.8.1.8]
K01719	CN	0.0027199	0.0334897	1.70021	Metabolism of cofactors and vitamins	hemD, UROS; uroporphyrinogen-III synthase [EC:4.2.1.75]
K01911	CN	0.00312746	0.0358132	1.69865	Metabolism of cofactors and vitamins	menE; o-succinylbenzoate---CoA ligase [EC:6.2.1.26]
K00946	CN	0.000556639	0.0200288	1.68004	Metabolism of cofactors and vitamins	thiL; thiamine-monophosphate kinase [EC:2.7.4.16]
K03801	CN	0.00302073	0.0352367	1.678	Metabolism of cofactors and vitamins	lipB; lipoyl(octanoyl) transferase [EC:2.3.1.181]
K03473	CN	0.00204522	0.0287655	1.66318	Metabolism of cofactors and vitamins	pdxB; erythronate-4-phosphate dehydrogenase [EC:1.1.1.290]
K04719	CN	0.00141627	0.025121	1.6446	Metabolism of cofactors and vitamins	bluB; 5,6-dimethylbenzimidazole synthase [EC:1.13.11.79]
K00275	CN	0.000368875	0.0176397	1.62916	Metabolism of cofactors and vitamins	pdxH, PNPO; pyridoxamine 5'-phosphate oxidase [EC:1.4.3.5]
K02619	CN	0.00131394	0.0246824	1.55997	Metabolism of cofactors and vitamins	pabC; 4-amino-4-deoxychorismate lyase [EC:4.1.3.38]
K01077	CN	0.000202653	0.0160765	1.4965	Metabolism of cofactors and vitamins	E3.1.3.1, phoA, phoB; alkaline phosphatase [EC:3.1.3.1]
K01665	CN	0.00253465	0.0323139	1.4907	Metabolism of cofactors and vitamins	pabB; para-aminobenzoate synthetase component I [EC:2.6.1.85]
K06920	CN	0.000492694	0.0193602	1.41064	Metabolism of cofactors and vitamins	queC; 7-cyano-7-deazaguanine synthase [EC:6.3.4.20]
K10026	CN	0.00411121	0.0418651	1.36328	Metabolism of cofactors and vitamins	queE; 7-carboxy-7-deazaguanine synthase [EC:4.3.99.3]
K01737	CN	0.00323759	0.0365352	1.33826	Metabolism of cofactors and vitamins	queD, ptpS, PTS; 6-pyruvoyltetrahydropterin/6-carboxytetrahydropterin synthase [EC:4.2.3.12 4.1.2.50]
K18285	CN	0.00371378	0.0394302	1.2171	Metabolism of cofactors and vitamins	mqnE; aminodeoxyfutalosine synthase [EC:2.5.1.120]
K03851	CN	0.000968461	0.0228064	2.64284	Metabolism of other amino acids	tpa; taurine-pyruvate aminotransferase [EC:2.6.1.77]
K05306	CN	0.00371378	0.0394302	1.62692	Metabolism of other amino acids	phnX; phosphonoacetaldehyde hydrolase [EC:3.11.1.1]
K09591	CN	0.00276609	0.0337704	5.36469	Metabolism of terpenoids and polyketides	DET2; steroid 5-alpha-reductase [EC:1.3.1.22]
K15661	CN	0.000680376	0.0210472	2.64321	Metabolism of terpenoids and polyketides	ituA, mycA, bmyA; iturin family lipopeptide synthetase A
K02523	CN	0.00136423	0.0249043	1.77159	Metabolism of terpenoids and polyketides	ispB; octaprenyl-diphosphate synthase [EC:2.5.1.90]
K13700	CN	0.00335118	0.0372584	1.6872	Nervous system	ABHD6; abhydrolase domain-containing protein 6 [EC:3.1.1.23]
K13985	CN	0.00121838	0.0242233	1.60183	Nervous system	NAPEPLD; N-acyl-phosphatidylethanolamine-hydrolysing phospholipase D [EC:3.1.4.54]
K17680	CN	0.000453896	0.018891	2.44454	Neurodegenerative disease	PEO1; twinkle protein [EC:3.6.4.12]
K01241	CN	0.000274339	0.0169474	2.07075	Nucleotide metabolism	amn; AMP nucleosidase [EC:3.2.2.4]
K08723	CN	0.00470025	0.0456101	1.75071	Nucleotide metabolism	yjjG; 5'-nucleotidase [EC:3.1.3.5]
K03787	CN	0.00170459	0.0267433	1.64305	Nucleotide metabolism	surE; 5'-nucleotidase [EC:3.1.3.5]
K03651	CN	0.000453896	0.018891	1.61597	Nucleotide metabolism	cpdA; 3',5'-cyclic-AMP phosphodiesterase [EC:3.1.4.53]
K01119	CN	0.000680376	0.0210472	1.5624	Nucleotide metabolism	cpdB; 2',3'-cyclic-nucleotide 2'-phosphodiesterase / 3'-nucleotidase [EC:3.1.4.16 3.1.3.6]
K01081	CN	0.00190219	0.0279423	1.52141	Nucleotide metabolism	E3.1.3.5; 5'-nucleotidase [EC:3.1.3.5]
K07022	CN	0.00176828	0.0271024	2.91926	Poorly characterized	K07022; uncharacterized protein
K09957	CN	0.00131394	0.0246824	2.68261	Poorly characterized	K09957; uncharacterized protein
K09764	CN	0.00371378	0.0394302	2.61087	Poorly characterized	K09764; uncharacterized protein
K07059	CN	0.00158341	0.026074	2.55266	Poorly characterized	K07059; uncharacterized protein
K09992	CN	0.00281703	0.0340746	2.46919	Poorly characterized	K09992; uncharacterized protein
K09922	CN	0.00136423	0.0249043	2.33126	Poorly characterized	K09922; uncharacterized protein
K09964	CN	0.00227808	0.0305408	2.25875	Poorly characterized	K09964; uncharacterized protein
K09939	CN	0.00190219	0.0279423	2.18218	Poorly characterized	K09939; uncharacterized protein
K09797	CN	0.000707966	0.0212366	2.12625	Poorly characterized	K09797; uncharacterized protein
K21741	CN	0.000368875	0.0176397	2.04718	Poorly characterized	rclC; reactive chlorine resistance protein C
K07148	CN	0.000251773	0.0167179	2.02419	Poorly characterized	K07148; uncharacterized protein
K09702	CN	0.00100656	0.0230276	1.95963	Poorly characterized	K09702; uncharacterized protein
K06882	CN	0.00236087	0.0311326	1.87848	Poorly characterized	K06882; uncharacterized protein
K06885	CN	0.00335118	0.0372584	1.84058	Poorly characterized	K06885; uncharacterized protein
K03931	CN	0.0026258	0.0329027	1.74825	Poorly characterized	ygjK; putative isomerase
K07078	CN	0.00454632	0.0446659	1.70504	Poorly characterized	K07078; uncharacterized protein
K06884	CN	0.00164298	0.0264005	1.69146	Poorly characterized	K06884; uncharacterized protein
K02426	CN	0.00104602	0.0232438	1.6895	Poorly characterized	sufE; cysteine desulfuration protein SufE
K09973	CN	0.00108688	0.0234963	1.6857	Poorly characterized	K09973; uncharacterized protein
K09003	CN	0.00291728	0.0346571	1.6563	Poorly characterized	K09003; uncharacterized protein
K03558	CN	0.00227808	0.0305408	1.63367	Poorly characterized	cvpA; membrane protein required for colicin V production
K06975	CN	0.00136423	0.0249043	1.57525	Poorly characterized	K06975; uncharacterized protein
K15505	CN	0.000479394	0.0192054	7.24299	Protein families: genetic information processing	RAD5; DNA repair protein RAD5 [EC:3.6.4.-]
K21564	CN	1.7064e-05	0.0118913	3.70316	Protein families: genetic information processing	nnrR; CRP/FNR family transcriptional regulator, nitrogen oxide reductase regulator
K06184	CN	0.00117302	0.0239861	3.63659	Protein families: genetic information processing	ABCF1; ATP-binding cassette, subfamily F, member 1
K00670	CN	4.00918e-05	0.0122195	3.20364	Protein families: genetic information processing	NAA30, MAK3; N-alpha-acetyltransferase 30 [EC:2.3.1.256]
K18754	CN	0.00176828	0.0271024	2.91926	Protein families: genetic information processing	LIN28; protein lin-28
K19360	CN	0.00291728	0.0346571	2.76175	Protein families: genetic information processing	NPHP3; nephrocystin-3
K19036	CN	0.000628132	0.0206543	2.39798	Protein families: genetic information processing	IGHMBP2; ATP-dependent RNA/DNA helicase IGHMBP2 [EC:3.6.4.12 3.6.4.13]
K13195	CN	0.00100656	0.0230276	2.39045	Protein families: genetic information processing	CIRBP; cold-inducible RNA-binding protein
K21557	CN	0.000513217	0.0195878	2.38113	Protein families: genetic information processing	susR; HTH-type transcriptional regulator, polysaccharide utilization system transcription regulator
K17081	CN	0.00141627	0.025121	2.381	Protein families: genetic information processing	PHB2; prohibitin 2
K07050	CN	0.000828893	0.0219468	2.26208	Protein families: genetic information processing	AARSD1, ALAX; misacylated tRNA(Ala) deacylase [EC:3.1.1.-]
K21556	CN	0.000680376	0.0210472	2.25802	Protein families: genetic information processing	malR; CRP/FNR family transcriptional regulator, polysaccharide utilization system transcription regulator
K07735	CN	0.0015258	0.0257613	2.18714	Protein families: genetic information processing	algH; putative transcriptional regulator
K01551	CN	0.00236087	0.0311326	2.15731	Protein families: genetic information processing	arsA, ASNA1, GET3; arsenite/tail-anchored protein-transporting ATPase [EC:7.3.2.7 7.3.-.-]
K13652	CN	0.000861944	0.0221128	2.14831	Protein families: genetic information processing	K13652; AraC family transcriptional regulator
K03773	CN	0.000325181	0.0173631	2.00366	Protein families: genetic information processing	fklB; FKBP-type peptidyl-prolyl cis-trans isomerase FklB [EC:5.2.1.8]
K02508	CN	0.00141627	0.025121	1.97377	Protein families: genetic information processing	hpaA; AraC family transcriptional regulator, 4-hydroxyphenylacetate 3-monooxygenase operon regulatory protein
K03771	CN	0.000262832	0.0168345	1.96972	Protein families: genetic information processing	surA; peptidyl-prolyl cis-trans isomerase SurA [EC:5.2.1.8]
K07277	CN	0.000251773	0.0167179	1.90329	Protein families: genetic information processing	SAM50, TOB55, bamA; outer membrane protein insertion porin family
K00561	CN	0.00519036	0.0484915	1.88759	Protein families: genetic information processing	ermC, ermA; 23S rRNA (adenine-N6)-dimethyltransferase [EC:2.1.1.184]
K18954	CN	0.00236087	0.0311326	1.88131	Protein families: genetic information processing	pobR; AraC family transcriptional regulator, transcriptional activator of pobA
K05801	CN	0.00121838	0.0242233	1.87931	Protein families: genetic information processing	djlA; DnaJ like chaperone protein
K02199	CN	0.000113367	0.0139204	1.87167	Protein families: genetic information processing	ccmG, dsbE; cytochrome c biogenesis protein CcmG, thiol:disulfide interchange protein DsbE
K21562	CN	0.000828893	0.0219468	1.83201	Protein families: genetic information processing	flp; CRP/FNR family transcriptional regulator, anaerobic regulatory protein
K15338	CN	0.00136423	0.0249043	1.82928	Protein families: genetic information processing	GEN1, GEN; flap endonuclease GEN [EC:3.1.-.-]
K04084	CN	0.0011292	0.0237438	1.80472	Protein families: genetic information processing	dsbD, dipZ; thioredoxin:protein disulfide reductase [EC:1.8.4.16]
K03694	CN	0.00236087	0.0311326	1.79499	Protein families: genetic information processing	clpA; ATP-dependent Clp protease ATP-binding subunit ClpA
K18997	CN	0.00227808	0.0305408	1.77117	Protein families: genetic information processing	cbpM; chaperone modulatory protein CbpM
K03770	CN	0.000828893	0.0219468	1.76093	Protein families: genetic information processing	ppiD; peptidyl-prolyl cis-trans isomerase D [EC:5.2.1.8]
K15461	CN	0.0011292	0.0237438	1.74238	Protein families: genetic information processing	mnmC; tRNA 5-methylaminomethyl-2-thiouridine biosynthesis bifunctional protein [EC:2.1.1.61 1.5.-.-]
K22108	CN	0.000492694	0.0193602	1.68137	Protein families: genetic information processing	kstR2; TetR/AcrR family transcriptional regulator, cholesterol catabolism regulator
K15545	CN	0.00183412	0.0275243	1.65583	Protein families: genetic information processing	mlc; transcriptional regulator of PTS gene
K02622	CN	0.000653775	0.0208532	1.64765	Protein families: genetic information processing	parE; topoisomerase IV subunit B [EC:5.6.2.2]
K03772	CN	0.00227808	0.0305408	1.63269	Protein families: genetic information processing	fkpA; FKBP-type peptidyl-prolyl cis-trans isomerase FkpA [EC:5.2.1.8]
K02621	CN	0.000766247	0.021601	1.59702	Protein families: genetic information processing	parC; topoisomerase IV subunit A [EC:5.6.2.2]
K04762	CN	0.00236087	0.0311326	1.59626	Protein families: genetic information processing	hslR; ribosome-associated heat shock protein Hsp15
K03775	CN	0.00470025	0.0456101	1.57669	Protein families: genetic information processing	slyD; FKBP-type peptidyl-prolyl cis-trans isomerase SlyD [EC:5.2.1.8]
K03803	CN	0.00358918	0.0387063	1.52845	Protein families: genetic information processing	rseC; sigma-E factor negative regulatory protein RseC
K21826	CN	0.00454632	0.0446659	1.38092	Protein families: genetic information processing	gbdR; AraC family transcriptional regulator, glycine betaine-responsive activator
K04763	CN	0.00425191	0.0427929	1.32747	Protein families: genetic information processing	xerD; integrase/recombinase XerD
K17609	CN	0.00485882	0.0465664	4.5829	Protein families: metabolism	NXN; nucleoredoxin [EC:1.8.1.8]
K24655	CN	0.00358918	0.0387063	3.81377	Protein families: metabolism	wbpX; O-antigen biosynthesis alpha-1,2-rhamnosyltransferase [EC:2.4.1.-]
K21364	CN	0.00197253	0.0283561	2.96412	Protein families: metabolism	wfeD; UDP-Gal:alpha-D-GlcNAc-diphosphoundecaprenol beta-1,4-galactosyltransferase [EC:2.4.1.304]
K13002	CN	0.000931688	0.0225802	2.89381	Protein families: metabolism	wbyL; glycosyltransferase [EC:2.4.1.-]
K13005	CN	0.00358918	0.0387063	2.65047	Protein families: metabolism	rfbV; abequosyltransferase [EC:2.4.1.60]
K08587	CN	0.000556639	0.0200288	2.63961	Protein families: metabolism	cloSI; clostripain [EC:3.4.22.8]
K14213	CN	0.00485882	0.0465664	2.57283	Protein families: metabolism	PEPD; Xaa-Pro dipeptidase [EC:3.4.13.9]
K00683	CN	0.00190219	0.0279423	2.40268	Protein families: metabolism	QPCT; glutaminyl-peptide cyclotransferase [EC:2.3.2.5]
K08676	CN	0.00136423	0.0249043	2.36557	Protein families: metabolism	tri; tricorn protease [EC:3.4.21.-]
K12994	CN	0.00117302	0.0239861	2.2114	Protein families: metabolism	wbdB, mtfB; O-antigen biosynthesis alpha-1,3-mannosyltransferase [EC:2.4.1.349 2.4.1.-]
K19702	CN	0.00312746	0.0358132	2.1976	Protein families: metabolism	E3.4.11.24; aminopeptidase S [EC:3.4.11.24]
K19694	CN	0.000368875	0.0176397	2.16047	Protein families: metabolism	chiS; two-component system, sensor histidine kinase ChiS
K01277	CN	0.000968461	0.0228064	2.15644	Protein families: metabolism	DPP3; dipeptidyl-peptidase III [EC:3.4.14.4]
K07263	CN	0.000185619	0.0157915	2.14516	Protein families: metabolism	pqqL; zinc protease [EC:3.4.24.-]
K09650	CN	0.000797007	0.0217762	2.13531	Protein families: metabolism	PARL, PSARL, PCP1; rhomboid-like protein [EC:3.4.21.105]
K13683	CN	0.000155463	0.0151708	2.08514	Protein families: metabolism	wcaE; putative colanic acid biosynthesis glycosyltransferase [EC:2.4.-.-]
K08307	CN	0.000311714	0.0172644	1.91837	Protein families: metabolism	mltD, dniR; membrane-bound lytic murein transglycosylase D [EC:4.2.2.-]
K01284	CN	0.00104602	0.0232438	1.87864	Protein families: metabolism	dcp; peptidyl-dipeptidase Dcp [EC:3.4.15.5]
K23424	CN	0.00176828	0.0271024	1.83932	Protein families: metabolism	TMTC; protein O-mannosyl-transferase [EC:2.4.1.-]
K01302	CN	0.00227808	0.0305408	1.83088	Protein families: metabolism	CPQ; carboxypeptidase Q [EC:3.4.17.-]
K18691	CN	0.000797007	0.0217762	1.78543	Protein families: metabolism	mltF; membrane-bound lytic murein transglycosylase F [EC:4.2.2.-]
K07387	CN	0.000828893	0.0219468	1.77633	Protein families: metabolism	K07387; metalloprotease [EC:3.4.24.-]
K13684	CN	0.000931688	0.0225802	1.76468	Protein families: metabolism	wcaC; putative colanic acid biosynthesis glycosyltransferase [EC:2.4.-.-]
K13694	CN	0.00397469	0.0410515	1.71692	Protein families: metabolism	mepS, spr; murein DD-endopeptidase / murein LD-carboxypeptidase [EC:3.4.-.- 3.4.17.13]
K19304	CN	0.000472929	0.0191279	1.70641	Protein families: metabolism	mepM; murein DD-endopeptidase [EC:3.4.24.-]
K24847	CN	0.0015258	0.0257613	1.69482	Protein families: metabolism	rlhA; 23S rRNA 5-hydroxycytidine C2501 synthase
K17732	CN	0.00323759	0.0365352	1.58955	Protein families: metabolism	PMPCB, MAS1; mitochondrial-processing peptidase subunit beta [EC:3.4.24.64]
K02478	CN	0.000603415	0.0204506	1.5793	Protein families: metabolism	K02478; two-component system, LytTR family, sensor kinase [EC:2.7.13.3]
K01295	CN	0.00470025	0.0456101	1.57232	Protein families: metabolism	cpg; glutamate carboxypeptidase [EC:3.4.17.11]
K12940	CN	0.00236087	0.0311326	1.5098	Protein families: metabolism	abgA; aminobenzoyl-glutamate utilization protein A
K03592	CN	0.00439691	0.0437267	1.48441	Protein families: metabolism	pmbA; PmbA protein
K04773	CN	0.00384225	0.0402397	1.46092	Protein families: metabolism	sppA; protease IV [EC:3.4.21.-]
K02480	CN	0.00358918	0.0387063	1.43149	Protein families: metabolism	K02480; two-component system, NarL family, sensor kinase [EC:2.7.13.3]
K24657	CN	0.00502215	0.0475271	1.3861	Protein families: metabolism	wbpZ; O-antigen biosynthesis rhamnosyltransferase [EC:2.4.1.-]
K19136	CN	0.000178066	0.0156515	4.16917	Protein families: signaling and cellular processes	csx17; CRISPR-associated protein Csx17
K18298	CN	5.9002e-05	0.0123001	3.40348	Protein families: signaling and cellular processes	mexE; membrane fusion protein, multidrug efflux system
K18904	CN	0.000797007	0.0217762	2.77717	Protein families: signaling and cellular processes	nodT, ameC; outer membrane protein, multidrug efflux system
K12282	CN	0.00203845	0.0287281	2.75549	Protein families: signaling and cellular processes	mshL; MSHA biogenesis protein MshL
K07221	CN	0.00485882	0.0465664	2.65956	Protein families: signaling and cellular processes	oprO_P; phosphate-selective porin OprO and OprP
K19418	CN	0.000579594	0.0202421	2.57759	Protein families: signaling and cellular processes	epsK; membrane protein EpsK
K11021	CN	0.000828893	0.0219468	2.56039	Protein families: signaling and cellular processes	tccC; insecticidal toxin complex protein TccC
K08222	CN	0.00212033	0.0293569	2.51055	Protein families: signaling and cellular processes	yqgE; MFS transporter, YQGE family, putative transporter
K15725	CN	0.0026258	0.0329027	2.49467	Protein families: signaling and cellular processes	czcC, cusC, cnrC; outer membrane protein, heavy metal efflux system
K15727	CN	0.00204522	0.0287655	2.40416	Protein families: signaling and cellular processes	czcB, cusB, cnrB; membrane fusion protein, heavy metal efflux system
K21573	CN	0.000736579	0.0214211	2.3784	Protein families: signaling and cellular processes	susC; TonB-dependent starch-binding outer membrane protein SusC
K21572	CN	0.000707966	0.0212366	2.36601	Protein families: signaling and cellular processes	susD; starch-binding outer membrane protein, SusD/RagB family
K02481	CN	0.000707966	0.0212366	2.33659	Protein families: signaling and cellular processes	flgR; two-component system, NtrC family, response regulator
K16327	CN	0.000680376	0.0210472	2.30594	Protein families: signaling and cellular processes	K16327; putative LysE/RhtB family amino acid efflux pump
K11015	CN	0.00302073	0.0352367	2.28899	Protein families: signaling and cellular processes	cdtC; cytolethal distending toxin subunit C
K21137	CN	0.00411121	0.0418651	2.28774	Protein families: signaling and cellular processes	triB; membrane fusion protein, multidrug efflux system
K15726	CN	0.00397469	0.0410515	2.20921	Protein families: signaling and cellular processes	czcA, cusA, cnrA; heavy metal efflux system protein
K21134	CN	0.000736579	0.0214211	2.13996	Protein families: signaling and cellular processes	triC; multidrug efflux pump
K03561	CN	0.000142153	0.0148348	2.13193	Protein families: signaling and cellular processes	exbB; biopolymer transport protein ExbB
K03559	CN	0.00136423	0.0249043	2.08968	Protein families: signaling and cellular processes	exbD; biopolymer transport protein ExbD
K16089	CN	0.000353743	0.0175507	2.07586	Protein families: signaling and cellular processes	TC.FEV.OM2, cirA, cfrA, hmuR; outer membrane receptor for ferrienterochelin and colicins
K16092	CN	0.00043557	0.0186495	2.06118	Protein families: signaling and cellular processes	btuB; vitamin B12 transporter
K03220	CN	0.00158341	0.026074	2.04538	Protein families: signaling and cellular processes	yscD, sctD, ssaD; type III secretion protein D
K04054	CN	0.00158341	0.026074	2.04538	Protein families: signaling and cellular processes	yscK, sctK; type III secretion protein K
K04060	CN	0.00158341	0.026074	2.04538	Protein families: signaling and cellular processes	yscY, sctY; type III secretion protein Y
K02856	CN	0.000628132	0.0206543	1.99413	Protein families: signaling and cellular processes	rhaT; L-rhamnose-H+ transport protein
K00638	CN	0.000931688	0.0225802	1.97706	Protein families: signaling and cellular processes	catB; chloramphenicol O-acetyltransferase type B [EC:2.3.1.28]
K02014	CN	0.000896196	0.022349	1.97116	Protein families: signaling and cellular processes	TC.FEV.OM; iron complex outermembrane recepter protein
K03832	CN	0.000417928	0.0184035	1.95657	Protein families: signaling and cellular processes	tonB; periplasmic protein TonB
K08717	CN	0.000968461	0.0228064	1.94944	Protein families: signaling and cellular processes	utp; urea transporter
K03286	CN	0.000417928	0.0184035	1.9171	Protein families: signaling and cellular processes	TC.OOP; OmpA-OmpF porin, OOP family
K02429	CN	4.41985e-05	0.0122427	1.88843	Protein families: signaling and cellular processes	fucP; MFS transporter, FHS family, L-fucose permease
K14726	CN	0.00204522	0.0287655	1.87994	Protein families: signaling and cellular processes	SLC9A10_11; solute carrier family 9 (sodium/hydrogen exchanger), member 10/11
K24846	CN	0.00197253	0.0283561	1.87971	Protein families: signaling and cellular processes	pglK; ATP-binding cassette, subfamily B, bacterial PglK [EC:7.5.2.-]
K02666	CN	0.0011292	0.0237438	1.87398	Protein families: signaling and cellular processes	pilQ; type IV pilus assembly protein PilQ
K04744	CN	0.000603415	0.0204506	1.86804	Protein families: signaling and cellular processes	lptD, imp, ostA; LPS-assembly protein
K16695	CN	0.00158341	0.026074	1.81885	Protein families: signaling and cellular processes	wzxC; lipopolysaccharide exporter
K07791	CN	0.00204522	0.0287655	1.80862	Protein families: signaling and cellular processes	dcuA; anaerobic C4-dicarboxylate transporter DcuA
K06076	CN	0.0015258	0.0257613	1.76367	Protein families: signaling and cellular processes	fadL; long-chain fatty acid transport protein
K08138	CN	0.00100656	0.0230276	1.75605	Protein families: signaling and cellular processes	xylE; MFS transporter, SP family, xylose:H+ symportor
K05807	CN	0.00121838	0.0242233	1.7549	Protein families: signaling and cellular processes	bamD; outer membrane protein assembly factor BamD
K18302	CN	0.00302073	0.0352367	1.74583	Protein families: signaling and cellular processes	mexJ; membrane fusion protein, multidrug efflux system
K16053	CN	0.00126534	0.0244554	1.73846	Protein families: signaling and cellular processes	ybdG, mscM; miniconductance mechanosensitive channel
K18303	CN	0.00100656	0.0230276	1.7307	Protein families: signaling and cellular processes	mexK; multidrug efflux pump
K03560	CN	0.00204522	0.0287655	1.71708	Protein families: signaling and cellular processes	tolR; biopolymer transport protein TolR
K08191	CN	0.00164298	0.0264005	1.67422	Protein families: signaling and cellular processes	exuT; MFS transporter, ACS family, hexuronate transporter
K24730	CN	0.00104602	0.0232438	1.66959	Protein families: signaling and cellular processes	CIAO1, CIA1; cytosolic iron-sulfur protein assembly protein CIAO1
K11537	CN	0.00502215	0.0475271	1.65627	Protein families: signaling and cellular processes	xapB; MFS transporter, NHS family, xanthosine permease
K05595	CN	0.00323759	0.0365352	1.63389	Protein families: signaling and cellular processes	marC; multiple antibiotic resistance protein
K08223	CN	0.000861944	0.0221128	1.57722	Protein families: signaling and cellular processes	fsr; MFS transporter, FSR family, fosmidomycin resistance protein
K02100	CN	0.00176828	0.0271024	1.57544	Protein families: signaling and cellular processes	araE; MFS transporter, SP family, arabinose:H+ symporter
K18234	CN	0.00176828	0.0271024	1.51742	Protein families: signaling and cellular processes	vat; virginiamycin A acetyltransferase [EC:2.3.1.-]
K03327	CN	0.000653775	0.0208532	1.40865	Protein families: signaling and cellular processes	TC.MATE, SLC47A, norM, mdtK, dinF; multidrug resistance protein, MATE family
K07114	CN	0.00244636	0.0317238	1.35558	Protein families: signaling and cellular processes	yfbK; Ca-activated chloride channel homolog
K10848	CN	0.00502215	0.0475271	3.8232	Replication and repair	ERCC4, XPF; DNA excision repair protein ERCC-4 [EC:3.1.-.-]
K10742	CN	0.00136423	0.0249043	2.25141	Replication and repair	DNA2; DNA replication ATP-dependent helicase Dna2 [EC:3.6.4.12]
K04990	CN	9.00824e-05	0.0130132	3.16386	Sensory system	PKD2L1; polycystin 2L1
K19692	CN	0.00190219	0.0279423	4.88097	Signal transduction	TCSA; osomolarity two-component system, sensor histidine kinase TcsA [EC:2.7.13.3]
K07691	CN	0.00197253	0.0283561	2.96412	Signal transduction	comA; two-component system, NarL family, competent response regulator ComA
K14979	CN	0.00104602	0.0232438	2.71125	Signal transduction	ssrB; two-component system, LuxR family, secretion system response regulator SsrB
K07672	CN	0.000968461	0.0228064	2.51396	Signal transduction	trcR; two-component system, OmpR family, response regulator TrcR
K10909	CN	0.00028631	0.0170566	2.36613	Signal transduction	luxQ; two-component system, autoinducer 2 sensor kinase/phosphatase LuxQ [EC:2.7.13.3 3.1.3.-]
K11383	CN	0.000400946	0.0181531	2.36272	Signal transduction	kinB; two-component system, NtrC family, sensor histidine kinase KinB [EC:2.7.13.3]
K07165	CN	0.000797007	0.0217762	2.36125	Signal transduction	fecR; transmembrane sensor
K13598	CN	0.00147011	0.0254437	2.32052	Signal transduction	ntrY; two-component system, NtrC family, nitrogen regulation sensor histidine kinase NtrY [EC:2.7.13.3]
K18353	CN	0.000556639	0.0200288	2.31408	Signal transduction	vanJ; vancomycin resistance protein VanJ
K07648	CN	0.000353743	0.0175507	2.22263	Signal transduction	arcB; two-component system, OmpR family, aerobic respiration control sensor histidine kinase ArcB [EC:2.7.13.3]
K11443	CN	0.0011292	0.0237438	2.20312	Signal transduction	divK; two-component system, cell cycle response regulator DivK
K08082	CN	0.000513217	0.0195878	2.15802	Signal transduction	algZ; two-component system, LytTR family, sensor histidine kinase AlgZ [EC:2.7.13.3]
K07716	CN	0.000579594	0.0202421	2.1319	Signal transduction	pleC; two-component system, cell cycle sensor histidine kinase PleC [EC:2.7.13.3]
K11688	CN	0.00204522	0.0287655	2.12411	Signal transduction	dctP; C4-dicarboxylate-binding protein DctP
K01991	CN	0.000162543	0.0153324	2.10935	Signal transduction	wza, gfcE; polysaccharide biosynthesis/export protein
K10941	CN	0.00100656	0.0230276	2.04617	Signal transduction	flrA, fleQ, flaK; sigma-54 dependent transcriptional regulator, flagellar regulatory protein
K19611	CN	0.000453896	0.018891	2.00428	Signal transduction	fepA, pfeA, iroN, pirA; ferric enterobactin receptor
K07787	CN	0.000492694	0.0193602	1.96145	Signal transduction	cusA, silA; copper/silver efflux system protein
K08738	CN	0.00291728	0.0346571	1.94819	Signal transduction	CYC; cytochrome c
K16692	CN	0.000353743	0.0175507	1.89776	Signal transduction	etk-wzc; tyrosine-protein kinase Etk/Wzc [EC:2.7.10.-]
K07713	CN	0.0027199	0.0334897	1.76716	Signal transduction	zraR, hydG; two-component system, NtrC family, response regulator HydG
K02106	CN	0.00312746	0.0358132	1.72026	Signal transduction	atoE; short-chain fatty acids transporter
K07645	CN	0.00164298	0.0264005	1.71192	Signal transduction	qseC; two-component system, OmpR family, sensor histidine kinase QseC [EC:2.7.13.3]
K03092	CN	2.69745e-05	0.0120991	1.65851	Signal transduction	rpoN; RNA polymerase sigma-54 factor
K07783	CN	0.00358918	0.0387063	1.57403	Signal transduction	uhpC; MFS transporter, OPA family, sugar phosphate sensor protein UhpC
K03413	CN	0.00335118	0.0372584	1.338	Signal transduction	cheY; two-component system, chemotaxis family, chemotaxis protein CheY
K13098	CN	3.81751e-05	0.0122069	3.80335	Transcription	TLS, FUS; RNA-binding protein FUS
K03538	CN	0.00017761	0.0156427	3.10989	Translation	POP4, RPP29; ribonuclease P protein subunit POP4 [EC:3.1.26.5]
K03113	CN	0.0015258	0.0257613	1.68633	Translation	EIF1, SUI1; translation initiation factor 1
K15368	CN	0.000178066	0.0156515	4.16917	Unclassified: genetic information processing	sscA; secretion system chaperone SscA
K07488	CN	0.00121838	0.0242233	3.09841	Unclassified: genetic information processing	K07488; transposase
K07392	CN	0.000400946	0.0181531	2.71054	Unclassified: genetic information processing	PRS2; AAA family ATPase
K03668	CN	0.000861944	0.0221128	1.68473	Unclassified: genetic information processing	hslJ; heat shock protein HslJ
K01219	CN	0.000736579	0.0214211	6.40557	Unclassified: metabolism	E3.2.1.81; beta-agarase [EC:3.2.1.81]
K20757	CN	4.41985e-05	0.0122427	5.35236	Unclassified: metabolism	dthadh; threo-3-hydroxy-D-aspartate ammonia-lyase [EC:4.3.1.27]
K00810	CN	3.81751e-05	0.0122069	3.80335	Unclassified: metabolism	UBIAD1; menadiol prenyltransferase [EC:2.5.1.-]
K19296	CN	3.81751e-05	0.0122069	3.80335	Unclassified: metabolism	algF; alginate O-acetyltransferase complex protein AlgF
K07057	CN	1.79662e-05	0.0119193	3.55787	Unclassified: metabolism	bpsA; N4-bis(aminopropyl)spermidine synthase [EC:2.5.1.128]
K21420	CN	0.000142153	0.0148348	3.52442	Unclassified: metabolism	bpt; leucyl-tRNA---protein transferase [EC:2.3.2.29]
K01829	CN	0.00371378	0.0394302	3.48059	Unclassified: metabolism	E5.3.4.1; protein disulfide-isomerase [EC:5.3.4.1]
K16706	CN	0.000861944	0.0221128	3.29498	Unclassified: metabolism	tuaF; teichuronic acid biosynthesis protein TuaF
K01216	CN	0.000556639	0.0200288	2.92187	Unclassified: metabolism	E3.2.1.73; licheninase [EC:3.2.1.73]
K19052	CN	0.000230934	0.0164732	2.75534	Unclassified: metabolism	hepC; heparan-sulfate lyase [EC:4.2.2.8]
K15924	CN	0.00164298	0.0264005	2.73451	Unclassified: metabolism	xynC; glucuronoarabinoxylan endo-1,4-beta-xylanase [EC:3.2.1.136]
K22723	CN	0.000628132	0.0206543	2.70675	Unclassified: metabolism	AUR1; inositol phosphorylceramide synthase catalytic subunit [EC:2.7.1.227]
K20847	CN	0.00291728	0.0346571	2.66761	Unclassified: metabolism	g2d; glucan 1,6-alpha-isomaltosidase [EC:3.2.1.94]
K08961	CN	9.00824e-05	0.0130132	2.5618	Unclassified: metabolism	K08961; chondroitin-sulfate-ABC endolyase/exolyase [EC:4.2.2.20 4.2.2.21]
K01133	CN	0.000680376	0.0210472	2.49111	Unclassified: metabolism	betC; choline-sulfatase [EC:3.1.6.6]
K19050	CN	0.000828893	0.0219468	2.48526	Unclassified: metabolism	hepA; heparin lyase [EC:4.2.2.7]
K04768	CN	0.00291728	0.0346571	2.4752	Unclassified: metabolism	acuC; acetoin utilization protein AcuC
K22078	CN	0.000680376	0.0210472	2.46936	Unclassified: metabolism	PGGHG, ATHL1; protein-glucosylgalactosylhydroxylysine glucosidase [EC:3.2.1.107]
K21375	CN	0.00470025	0.0456101	2.46858	Unclassified: metabolism	albA; albonoursin synthase [EC:1.3.3.13]
K19181	CN	3.81751e-05	0.0122069	2.41513	Unclassified: metabolism	afr; 1,5-anhydro-D-fructose reductase (1,5-anhydro-D-mannitol-forming) [EC:1.1.1.292]
K07037	CN	0.000325181	0.0173631	2.39385	Unclassified: metabolism	pgpH; cyclic-di-AMP phosphodiesterase PgpH [EC:3.1.4.-]
K21575	CN	0.000384603	0.0178985	2.35691	Unclassified: metabolism	susA; neopullulanase [EC:3.2.1.135]
K21065	CN	0.00043557	0.0186495	2.33762	Unclassified: metabolism	E3.2.1.197; beta-1,2-mannosidase [EC:3.2.1.197]
K22721	CN	0.00028631	0.0170566	2.31445	Unclassified: metabolism	CSG1, SUR1, CSH1; inositol phosphorylceramide mannosyltransferase catalytic subunit [EC:2.4.1.370]
K16705	CN	0.000828893	0.0219468	2.24711	Unclassified: metabolism	tuaE; teichuronic acid biosynthesis protein TuaE
K13043	CN	0.000368875	0.0176397	2.23012	Unclassified: metabolism	argF; N-succinyl-L-ornithine transcarbamylase [EC:2.1.3.11]
K18398	CN	0.00183412	0.0275243	2.19683	Unclassified: metabolism	ENPP5; ectonucleotide pyrophosphatase/phosphodiesterase family member 5 [EC:3.1.-.-]
K07588	CN	0.000193963	0.0159361	2.19658	Unclassified: metabolism	argK; LAO/AO transport system kinase [EC:2.7.-.-]
K22905	CN	0.00212033	0.0293569	2.19382	Unclassified: metabolism	stf3; omega-hydroxy-beta-dihydromenaquinone-9 sulfotransferase [EC:2.8.2.-]
K00118	CN	0.00136423	0.0249043	2.16945	Unclassified: metabolism	gfo; glucose-fructose oxidoreductase [EC:1.1.99.28]
K18577	CN	0.00244636	0.0317238	2.1511	Unclassified: metabolism	EBM; mannosylglycoprotein endo-beta-mannosidase [EC:3.2.1.152]
K15538	CN	0.00358918	0.0387063	2.14954	Unclassified: metabolism	MANEA; glycoprotein endo-alpha-1,2-mannosidase [EC:3.2.1.130]
K18578	CN	0.0015258	0.0257613	2.1495	Unclassified: metabolism	CEL74A; xyloglucan-specific exo-beta-1,4-glucanase [EC:3.2.1.155]
K19430	CN	0.000368875	0.0176397	2.02874	Unclassified: metabolism	epsN; pyridoxal phosphate-dependent aminotransferase EpsN [EC:2.6.1.-]
K17948	CN	0.000797007	0.0217762	2.01967	Unclassified: metabolism	nanM; N-acetylneuraminate epimerase [EC:5.1.3.24]
K21132	CN	0.00323759	0.0365352	1.99348	Unclassified: metabolism	K21132; alpha-mannan endo-1,2-alpha-mannanase / glycoprotein endo-alpha-1,2-mannosidase [EC:3.2.1.198 3.2.1.130]
K22347	CN	0.00141627	0.025121	1.97297	Unclassified: metabolism	nox; 4,4'-dithiodibutanoate disulfide reductase [EC:1.8.1.20]
K00684	CN	0.000896196	0.022349	1.95628	Unclassified: metabolism	aat; leucyl/phenylalanyl-tRNA---protein transferase [EC:2.3.2.6]
K00347	CN	0.000896196	0.022349	1.94434	Unclassified: metabolism	nqrB; Na+-transporting NADH:ubiquinone oxidoreductase subunit B [EC:7.2.1.1]
K00348	CN	0.000896196	0.022349	1.93573	Unclassified: metabolism	nqrC; Na+-transporting NADH:ubiquinone oxidoreductase subunit C [EC:7.2.1.1]
K03818	CN	0.00170459	0.0267433	1.93202	Unclassified: metabolism	wcaF; putative colanic acid biosynthesis acetyltransferase WcaF [EC:2.3.1.-]
K00349	CN	0.00104602	0.0232438	1.92518	Unclassified: metabolism	nqrD; Na+-transporting NADH:ubiquinone oxidoreductase subunit D [EC:7.2.1.1]
K00350	CN	0.00104602	0.0232438	1.92518	Unclassified: metabolism	nqrE; Na+-transporting NADH:ubiquinone oxidoreductase subunit E [EC:7.2.1.1]
K00534	CN	0.00358918	0.0387063	1.91322	Unclassified: metabolism	E1.12.7.2S; ferredoxin hydrogenase small subunit [EC:1.12.7.2]
K00351	CN	0.000861944	0.0221128	1.90886	Unclassified: metabolism	nqrF; Na+-transporting NADH:ubiquinone oxidoreductase subunit F [EC:7.2.1.1]
K22843	CN	0.00536359	0.0494593	1.87152	Unclassified: metabolism	ETFBKMT, METTL20; ETFB lysine methyltransferase [EC:2.1.1.-]
K01144	CN	0.00335118	0.0372584	1.86176	Unclassified: metabolism	E3.1.11.5; exodeoxyribonuclease V [EC:3.1.11.5]
K00346	CN	0.00197253	0.0283561	1.86128	Unclassified: metabolism	nqrA; Na+-transporting NADH:ubiquinone oxidoreductase subunit A [EC:7.2.1.1]
K03387	CN	0.00312746	0.0358132	1.74392	Unclassified: metabolism	ahpF; NADH-dependent peroxiredoxin subunit F [EC:1.8.1.-]
K03824	CN	0.000828893	0.0219468	1.67011	Unclassified: metabolism	yhbS; putative acetyltransferase [EC:2.3.1.-]
K06911	CN	0.00190219	0.0279423	1.64764	Unclassified: metabolism	PIR; quercetin 2,3-dioxygenase [EC:1.13.11.24]
K12942	CN	0.00219792	0.0299488	1.64645	Unclassified: metabolism	abgT; aminobenzoyl-glutamate transport protein
K18929	CN	0.00470025	0.0456101	1.56334	Unclassified: metabolism	lldF; L-lactate dehydrogenase complex protein LldF
K03828	CN	0.00164298	0.0264005	1.53241	Unclassified: metabolism	yjgM; putative acetyltransferase [EC:2.3.1.-]
K24119	CN	0.00219792	0.0299488	1.46441	Unclassified: metabolism	ahpC; NADH-dependent peroxiredoxin subunit C [EC:1.11.1.26]
K18702	CN	0.00411121	0.0418651	1.4513	Unclassified: metabolism	uctC; CoA:oxalate CoA-transferase [EC:2.8.3.19]
K03827	CN	0.00470025	0.0456101	1.42202	Unclassified: metabolism	yjaB; putative acetyltransferase [EC:2.3.1.-]
K21936	CN	0.0011292	0.0237438	1.39305	Unclassified: metabolism	chuW; anaerobilin synthase [EC:2.1.1.342]
K21571	CN	0.00126534	0.0244554	2.36354	Unclassified: signaling and cellular processes	susE_F; starch-binding outer membrane protein SusE/F
K07257	CN	0.00121838	0.0242233	2.28118	Unclassified: signaling and cellular processes	spsF; spore coat polysaccharide biosynthesis protein SpsF
K06142	CN	0.000241145	0.0165975	1.952	Unclassified: signaling and cellular processes	hlpA, ompH; outer membrane protein
K01993	CN	0.00011865	0.0141117	1.92622	Unclassified: signaling and cellular processes	ABC-2.TX; HlyD family secretion protein
K07085	CN	0.000339185	0.0174585	1.9172	Unclassified: signaling and cellular processes	K07085; putative transport protein
K07322	CN	0.000142153	0.0148348	1.90466	Unclassified: signaling and cellular processes	ytfE, scdA; regulator of cell morphogenesis and NO signaling
K03296	CN	0.00104602	0.0232438	1.77686	Unclassified: signaling and cellular processes	TC.HAE1; hydrophobic/amphiphilic exporter-1 (mainly G- bacteria), HAE1 family
K07227	CN	0.00519036	0.0484915	1.73247	Unclassified: signaling and cellular processes	chuX; heme iron utilization protein
K07217	CN	0.00335118	0.0372584	1.54769	Unclassified: signaling and cellular processes	K07217; Mn-containing catalase
K03307	CN	0.00281703	0.0340746	1.5356	Unclassified: signaling and cellular processes	TC.SSS; solute:Na+ symporter, SSS family
K03305	CN	0.00104602	0.0232438	1.52428	Unclassified: signaling and cellular processes	TC.POT; proton-dependent oligopeptide transporter, POT family
K03455	CN	0.00371378	0.0394302	1.36452	Unclassified: signaling and cellular processes	TC.KEF; monovalent cation:H+ antiporter-2, CPA2 family
K22476	PE	0.00253465	0.0323139	1.97212	Amino acid metabolism	K22476; N-acetylglutamate synthase [EC:2.3.1.1]
K09065	PE	0.00136423	0.0249043	1.47905	Amino acid metabolism	argF; N-acetylornithine carbamoyltransferase [EC:2.1.3.9]
K00797	PE	0.00312746	0.0358132	1.21316	Amino acid metabolism	speE, SRM, SPE3; spermidine synthase [EC:2.5.1.16]
K00003	PE	0.000241145	0.0165975	1.21055	Amino acid metabolism	hom; homoserine dehydrogenase [EC:1.1.1.3]
K18572	PE	0.00164298	0.0264005	1.47536	Biosynthesis of other secondary metabolites	cmmT, thnT; putative pantetheine hydrolase [EC:3.5.1.-]
K15895	PE	0.00204522	0.0287655	2.53024	Carbohydrate metabolism	pseC; UDP-4-amino-4,6-dideoxy-L-N-acetyl-beta-L-altrosamine transaminase [EC:2.6.1.92]
K13954	PE	1.24984e-06	0.00747097	1.51903	Carbohydrate metabolism	yiaY; alcohol dehydrogenase [EC:1.1.1.1]
K00005	PE	0.00126534	0.0244554	1.42998	Carbohydrate metabolism	gldA; glycerol dehydrogenase [EC:1.1.1.6]
K00975	PE	4.63962e-05	0.0122535	1.31635	Carbohydrate metabolism	glgC; glucose-1-phosphate adenylyltransferase [EC:2.7.7.27]
K01571	PE	0.00425191	0.0427929	1.23451	Carbohydrate metabolism	oadA; oxaloacetate decarboxylase (Na+ extruding) subunit alpha [EC:7.2.4.2]
K01854	PE	0.00204522	0.0287655	1.21988	Carbohydrate metabolism	glf; UDP-galactopyranose mutase [EC:5.4.99.9]
K03431	PE	0.000797007	0.0217762	1.20352	Carbohydrate metabolism	glmM; phosphoglucosamine mutase [EC:5.4.2.10]
K20331	PE	0.00411121	0.0418651	3.18799	Cellular community - prokaryotes	toxA; toxoflavin synthase [EC:2.1.1.349]
K20964	PE	0.0026258	0.0329027	3.04249	Cellular community - prokaryotes	cdpA; c-di-GMP phosphodiesterase [EC:3.1.4.52]
K15023	PE	0.00371378	0.0394302	1.92397	Energy metabolism	acsE; 5-methyltetrahydrofolate corrinoid/iron sulfur protein methyltransferase [EC:2.1.1.258]
K03388	PE	0.000766247	0.021601	1.35173	Energy metabolism	hdrA2; heterodisulfide reductase subunit A2 [EC:1.8.7.3 1.8.98.4 1.8.98.5 1.8.98.6]
K00926	PE	0.00425191	0.0427929	1.25909	Energy metabolism	arcC; carbamate kinase [EC:2.7.2.2]
K22311	PE	0.00236087	0.0311326	2.6867	Glycan biosynthesis and metabolism	ptfP1; phosphatidylinositol dimannoside acyltransferase [EC:2.3.1.265]
K01227	PE	0.00470025	0.0456101	2.35348	Glycan biosynthesis and metabolism	ENGASE; mannosyl-glycoprotein endo-beta-N-acetylglucosaminidase [EC:3.2.1.96]
K05362	PE	0.000298762	0.0171622	1.76068	Glycan biosynthesis and metabolism	murE; UDP-N-acetylmuramoyl-L-alanyl-D-glutamate-L-lysine ligase [EC:6.3.2.7]
K07258	PE	0.00346835	0.0379822	1.25958	Glycan biosynthesis and metabolism	dacC, dacA, dacD; serine-type D-Ala-D-Ala carboxypeptidase (penicillin-binding protein 5/6) [EC:3.4.16.4]
K03429	PE	0.00346835	0.0379822	1.34773	Lipid metabolism	ugtP; processive 1,2-diacylglycerol beta-glucosyltransferase [EC:2.4.1.315]
K00864	PE	0.00454632	0.0446659	1.22546	Lipid metabolism	glpK, GK; glycerol kinase [EC:2.7.1.30]
K08591	PE	0.00425191	0.0427929	1.21987	Lipid metabolism	plsY; acyl phosphate:glycerol-3-phosphate acyltransferase [EC:2.3.1.275]
K19309	PE	4.20984e-05	0.0122314	2.35246	Membrane transport	bcrA; bacitracin transport system ATP-binding protein
K10560	PE	0.00126534	0.0244554	1.78165	Membrane transport	rhaP; rhamnose transport system permease protein
K10561	PE	0.00126534	0.0244554	1.77732	Membrane transport	rhaQ; rhamnose transport system permease protein
K10562	PE	0.00183412	0.0275243	1.74694	Membrane transport	rhaT; rhamnose transport system ATP-binding protein [EC:7.5.2.-]
K09696	PE	0.00384225	0.0402397	1.70686	Membrane transport	natB; sodium transport system permease protein
K20492	PE	0.00104602	0.0232438	1.70655	Membrane transport	nisG, spaG, cprC; lantibiotic transport system permease protein
K20491	PE	0.00126534	0.0244554	1.69968	Membrane transport	nisE, spaE, cprB, epiE; lantibiotic transport system permease protein
K17074	PE	0.000325181	0.0173631	1.6524	Membrane transport	lysX2; putative lysine transport system permease protein
K20490	PE	0.00302073	0.0352367	1.63126	Membrane transport	nisF, spaF, cprA, epiF; lantibiotic transport system ATP-binding protein
K10559	PE	0.00253465	0.0323139	1.61291	Membrane transport	rhaS; rhamnose transport system substrate-binding protein
K15772	PE	0.00141627	0.025121	1.55965	Membrane transport	ganQ; arabinogalactan oligomer / maltooligosaccharide transport system permease protein
K15771	PE	0.00170459	0.0267433	1.55567	Membrane transport	ganP; arabinogalactan oligomer / maltooligosaccharide transport system permease protein
K17076	PE	0.00136423	0.0249043	1.54742	Membrane transport	lysY; putative lysine transport system ATP-binding protein
K17073	PE	0.00158341	0.026074	1.54144	Membrane transport	lysX1; putative lysine transport system substrate-binding protein
K14699	PE	0.00302073	0.0352367	1.42783	Membrane transport	irtB, ybtQ; ATP-binding cassette, subfamily B, bacterial IrtB/YbtQ [EC:7.-.-.-]
K15770	PE	7.47499e-05	0.0125677	1.4143	Membrane transport	cycB, ganO; arabinogalactan oligomer / maltooligosaccharide transport system substrate-binding protein
K02006	PE	0.00183412	0.0275243	1.3874	Membrane transport	cbiO; cobalt/nickel transport system ATP-binding protein
K02017	PE	0.000861944	0.0221128	1.28875	Membrane transport	modC; molybdate transport system ATP-binding protein [EC:7.3.2.5]
K02020	PE	0.000339185	0.0174585	1.28347	Membrane transport	modA; molybdate transport system substrate-binding protein
K02018	PE	0.00108688	0.0234963	1.26799	Membrane transport	modB; molybdate transport system permease protein
K02784	PE	0.00117302	0.0239861	1.26502	Membrane transport	ptsH; phosphocarrier protein HPr
K18888	PE	6.18794e-05	0.0123081	1.22407	Membrane transport	efrB, efrF; ATP-binding cassette, subfamily B, multidrug efflux pump
K18887	PE	5.11016e-05	0.0122735	1.22141	Membrane transport	efrA, efrE; ATP-binding cassette, subfamily B, multidrug efflux pump
K16785	PE	0.00411121	0.0418651	1.22003	Membrane transport	ecfT; energy-coupling factor transport system permease protein
K09516	PE	0.00219792	0.0299488	2.07938	Metabolism of cofactors and vitamins	RETSAT; all-trans-retinol 13,14-reductase [EC:1.3.99.23]
K03752	PE	0.00170459	0.0267433	1.61657	Metabolism of cofactors and vitamins	mobA; molybdenum cofactor guanylyltransferase [EC:2.7.7.77]
K05934	PE	0.000534523	0.0198107	1.36428	Metabolism of cofactors and vitamins	cobJ, cbiH; precorrin-3B C17-methyltransferase / cobalt-factor III methyltransferase [EC:2.1.1.131 2.1.1.272]
K05936	PE	0.000653775	0.0208532	1.35151	Metabolism of cofactors and vitamins	cobM, cbiF; precorrin-4/cobalt-precorrin-4 C11-methyltransferase [EC:2.1.1.133 2.1.1.271]
K02189	PE	0.000766247	0.021601	1.34751	Metabolism of cofactors and vitamins	cbiG; cobalt-precorrin 5A hydrolase [EC:3.7.1.12]
K20861	PE	0.00136423	0.0249043	1.33881	Metabolism of cofactors and vitamins	ybjI; FMN hydrolase / 5-amino-6-(5-phospho-D-ribitylamino)uracil phosphatase [EC:3.1.3.102 3.1.3.104]
K06042	PE	0.00131394	0.0246824	1.32023	Metabolism of cofactors and vitamins	cobH-cbiC; precorrin-8X/cobalt-precorrin-8 methylmutase [EC:5.4.99.61 5.4.99.60]
K03637	PE	6.80312e-05	0.012323	1.31948	Metabolism of cofactors and vitamins	moaC, CNX3; cyclic pyranopterin monophosphate synthase [EC:4.6.1.17]
K03831	PE	0.00141627	0.025121	1.31344	Metabolism of cofactors and vitamins	mogA; molybdopterin adenylyltransferase [EC:2.7.7.75]
K19221	PE	0.00236087	0.0311326	1.22645	Metabolism of cofactors and vitamins	cobA, btuR; cob(I)alamin adenosyltransferase [EC:2.5.1.17]
K12527	PE	0.00131394	0.0246824	1.48273	Metabolism of other amino acids	ygfK; putative selenate reductase [EC:1.97.1.9]
K12529	PE	0.000472929	0.0191279	1.40338	Metabolism of other amino acids	ygfM; putative selenate reductase FAD-binding subunit
K12528	PE	0.000828893	0.0219468	1.39728	Metabolism of other amino acids	xdhD; putative selenate reductase molybdopterin-binding subunit
K14596	PE	0.00358918	0.0387063	2.33902	Metabolism of terpenoids and polyketides	crtX; zeaxanthin glucosyltransferase [EC:2.4.1.276]
K13484	PE	0.00219792	0.0299488	3.15321	Nucleotide metabolism	TTHL; 5-hydroxyisourate hydrolase / 2-oxo-4-hydroxy-4-carboxy-5-ureidoimidazoline decarboxylase [EC:3.5.2.17 4.1.1.97]
K01486	PE	0.00170459	0.0267433	1.33117	Nucleotide metabolism	ade; adenine deaminase [EC:3.5.4.2]
K07150	PE	0.00117302	0.0239861	1.34586	Poorly characterized	K07150; uncharacterized protein
K07015	PE	0.00158341	0.026074	1.28492	Poorly characterized	K07015; uncharacterized protein
K03576	PE	0.00384225	0.0402397	2.25594	Protein families: genetic information processing	metR; LysR family transcriptional regulator, regulator for metE and metH
K02525	PE	0.0011292	0.0237438	2.24285	Protein families: genetic information processing	kdgR; LacI family transcriptional regulator, kdg operon repressor
K15984	PE	9.43489e-05	0.0131156	1.67679	Protein families: genetic information processing	rsmJ; 16S rRNA (guanine1516-N2)-methyltransferase [EC:2.1.1.242]
K04749	PE	0.00302073	0.0352367	1.57601	Protein families: genetic information processing	rsbV; anti-sigma B factor antagonist
K03833	PE	0.00536359	0.0494593	1.46618	Protein families: genetic information processing	selB, EEFSEC; selenocysteine-specific elongation factor
K02855	PE	0.00335118	0.0372584	1.45718	Protein families: genetic information processing	rhaS; AraC family transcriptional regulator, L-rhamnose operon regulatory protein RhaS
K02019	PE	0.00302073	0.0352367	1.29395	Protein families: genetic information processing	modE; molybdate transport system regulatory protein
K09681	PE	0.00411121	0.0418651	1.29226	Protein families: genetic information processing	gltC; LysR family transcriptional regulator, transcription activator of glutamate synthase operon
K07727	PE	0.00028631	0.0170566	1.24922	Protein families: genetic information processing	K07727; putative transcriptional regulator
K00375	PE	0.00141627	0.025121	1.24884	Protein families: genetic information processing	K00375; GntR family transcriptional regulator / MocR family aminotransferase
K18422	PE	0.00291728	0.0346571	1.24043	Protein families: genetic information processing	MOV10; helicase MOV-10 [EC:3.6.4.13]
K14743	PE	0.00439691	0.0437267	2.26094	Protein families: metabolism	mycP; membrane-anchored mycosin MYCP [EC:3.4.21.-]
K13048	PE	0.000707966	0.0212366	1.69922	Protein families: metabolism	cps; carboxypeptidase Ss1 [EC:3.4.17.-]
K08869	PE	0.00291728	0.0346571	1.53886	Protein families: metabolism	ADCK, ABC1; aarF domain-containing kinase
K04757	PE	0.00126534	0.0244554	1.47756	Protein families: metabolism	rsbW; serine/threonine-protein kinase RsbW [EC:2.7.11.1]
K20444	PE	0.00227808	0.0305408	1.39958	Protein families: metabolism	rfbC; O-antigen biosynthesis protein [EC:2.4.1.-]
K06972	PE	0.00302073	0.0352367	1.35138	Protein families: metabolism	PITRM1, PreP, CYM1; presequence protease [EC:3.4.24.-]
K00903	PE	0.00158341	0.026074	1.30908	Protein families: metabolism	epsB; protein-tyrosine kinase [EC:2.7.10.2]
K02803	PE	0.00397469	0.0410515	2.51316	Protein families: signaling and cellular processes	nagEb; N-acetylglucosamine PTS system EIIB component [EC:2.7.1.193]
K09820	PE	0.00425191	0.0427929	2.23966	Protein families: signaling and cellular processes	ABC.MN.A; manganese/iron transport system ATP-binding protein
K06979	PE	0.00439691	0.0437267	2.23684	Protein families: signaling and cellular processes	mph; macrolide phosphotransferase
K09819	PE	0.00519036	0.0484915	2.11461	Protein families: signaling and cellular processes	ABC.MN.P; manganese/iron transport system permease protein
K02526	PE	6.18794e-05	0.0123081	1.8528	Protein families: signaling and cellular processes	kdgT; 2-keto-3-deoxygluconate permease
K06296	PE	0.00323759	0.0365352	1.732	Protein families: signaling and cellular processes	gerKB; spore germination protein KB
K12511	PE	6.5621e-06	0.0110633	1.68935	Protein families: signaling and cellular processes	tadC; tight adherence protein C
K16248	PE	0.00470025	0.0456101	1.57845	Protein families: signaling and cellular processes	gutA, gutP; probable glucitol transport protein GutA
K16924	PE	0.000680376	0.0210472	1.5462	Protein families: signaling and cellular processes	mtsT; energy-coupling factor transport system substrate-specific component
K09000	PE	0.00312746	0.0358132	1.43141	Protein families: signaling and cellular processes	cmr4; CRISPR-associated protein Cmr4
K19076	PE	0.00312746	0.0358132	1.43141	Protein families: signaling and cellular processes	cmr2, cas10; CRISPR-associated protein Cmr2
K02283	PE	0.00384225	0.0402397	1.35207	Protein families: signaling and cellular processes	cpaF, tadA; pilus assembly protein CpaF [EC:7.4.2.8]
K06148	PE	0.00371378	0.0394302	1.32795	Protein families: signaling and cellular processes	ABCC-BAC; ATP-binding cassette, subfamily C, bacterial
K02028	PE	0.000492694	0.0193602	1.25128	Protein families: signaling and cellular processes	ABC.PA.A; polar amino acid transport system ATP-binding protein [EC:7.4.2.1]
K02029	PE	0.00454632	0.0446659	1.24354	Protein families: signaling and cellular processes	ABC.PA.P; polar amino acid transport system permease protein
K02483	PE	0.00281703	0.0340746	1.22604	Protein families: signaling and cellular processes	K02483; two-component system, OmpR family, response regulator
K02030	PE	0.00485882	0.0465664	1.21171	Protein families: signaling and cellular processes	ABC.PA.S; polar amino acid transport system substrate-binding protein
K08737	PE	0.00291728	0.0346571	1.24043	Replication and repair	MSH6; DNA mismatch repair protein MSH6
K04961	PE	0.00100656	0.0230276	3.16916	Signal transduction	RYR1; ryanodine receptor 1
K07708	PE	0.00312746	0.0358132	1.8911	Signal transduction	glnL, ntrB; two-component system, NtrC family, nitrogen regulation sensor histidine kinase GlnL [EC:2.7.13.3]
K20487	PE	0.00244636	0.0317238	1.33057	Signal transduction	nisK, spaK; two-component system, OmpR family, lantibiotic biosynthesis sensor histidine kinase NisK/SpaK [EC:2.7.13.3]
K03187	PE	6.80312e-05	0.012323	1.82391	Unclassified: genetic information processing	ureE; urease accessory protein
K07402	PE	0.000492694	0.0193602	1.41538	Unclassified: genetic information processing	xdhC; xanthine dehydrogenase accessory factor
K07491	PE	0.00100656	0.0230276	1.3766	Unclassified: genetic information processing	K07491; putative transposase
K11165	PE	0.00219792	0.0299488	3.15321	Unclassified: metabolism	DHRS7; dehydrogenase/reductase SDR family member 7 [EC:1.1.-.-]
K04104	PE	5.36181e-05	0.0122828	1.64368	Unclassified: metabolism	accD3; acyl-CoA carboxylase subunit beta [EC:6.4.1.-]
K07469	PE	0.000931688	0.0225802	1.57698	Unclassified: metabolism	mop; aldehyde oxidoreductase [EC:1.2.99.7]
K01751	PE	0.000142153	0.0148348	1.57369	Unclassified: metabolism	E4.3.1.15; diaminopropionate ammonia-lyase [EC:4.3.1.15]
K22405	PE	0.000155463	0.0151708	1.48661	Unclassified: metabolism	fprA1_2; NADH oxidase (H2O-forming) [EC:1.6.3.4]
K09121	PE	0.00323759	0.0365352	1.35467	Unclassified: metabolism	larC; pyridinium-3,5-bisthiocarboxylic acid mononucleotide nickel chelatase [EC:4.99.1.12]
K00537	PE	0.000736579	0.0214211	1.22129	Unclassified: metabolism	arsC; arsenate reductase (glutaredoxin) [EC:1.20.4.1]
